# Supplementary material for: Interspecies RNA Interactome of Pathogen and Host in a Heritable Defensive Strategy
Source: Front Microbiol. 2021 Jul 21;12:649858. doi: 10.3389/fmicb.2021.649858 (PMC8334366; doi:10.3389/fmicb.2021.649858)
Supplement: Supplementary File 1 — All putative interactions of microRNA-sized host-induced sRNAs with C. elegans mRNAs downregulated during interaction with P. aeruginosa PAO1. [file Data_Sheet_1.xlsx]

## Sheet: sRNAs of interaction miRNA-size
File S1. All interactions by microRNA-sized induced sRNAs from bacteria
Sequence ID	Wormbase ID	Gene Name	Query Start	Query End	Bacterial TP ID	Bacteria TP start	Bacteria TP end	overall interaction energy	Sequence	dot-bracket notation
F12E12.11.1	WBGene00044811	F12E12.11	340	347	PAO_13118	14	21	-14.91	CGAUCCUC&GAGGAUCG	((((((((&))))))))
C01B10.11.1	WBGene00044294	C01B10.11	1001	1022	PAO_13118	2	21	-21.2	CUUUUCUCCUUCCCCCUCCACU&GGUGGAGCCAAGGAGGAUCG	(..((((((((....(((((((&)))))))..))))))))..)
K02E11.10.1	WBGene00044109	K02E11.10	14	38	PAO_13118	3	21	-14.87	UGAUCUUAGCCUGCCUUGUCUCCAC&GUGGAGCCAAGGAGGAUCG	(((((((......(((((.((((((&)))))).))))))))))))
F43C1.7.1	WBGene00023423	F43C1.7	10	30	PAO_13118	1	21	-14.84	CGAUUUUUCUAGGAUUUUCCA&UGGUGGAGCCAAGGAGGAUCG	((((((((((.((.(((.(((&))).))).)).))))))))))
F54D7.7.1	WBGene00023068	rpl-41.2	198	222	PAO_13118	2	22	-18.99	UCGUCUCCUUGUUACCUACUCCAUC&GGUGGAGCCAAGGAGGAUCGA	(((((((((((.......(((((((&))))))).))))))))..)))
ZK697.14.1	WBGene00022809	ZK697.14	538	546	PAO_13118	13	22	-11.15	UCAUUCUCC&GGAGGAUCGA	(((((((((&))))))).))
ZK652.2.1	WBGene00022783	tomm-7	138	157	PAO_13118	1	20	-23	GAUCCUCCCUCUUUCCGCCA&UGGUGGAGCCAAGGAGGAUC	((((((((....((((((((&))))))))....))))))))
ZC97.1a.1	WBGene00022516	mtx-2	120	141	PAO_13118	2	21	-13.45	CGAUUUUGCUGAUUGCCUCGCC&GGUGGAGCCAAGGAGGAUCG	(((((((.((....((.(((((&))))).))..)).)))))))
Y82E9BR.18.1	WBGene00022350	Y82E9BR.18	2509	2538	PAO_13118	1	22	-19.61	UCGAUUCUUACAACACUUACGGCUCAGCCA&UGGUGGAGCCAAGGAGGAUCGA	(((((((((......(((..(((((.((((&)))).)))))))))))))))))
Y73C8C.2.1	WBGene00022261	clec-210	522	543	PAO_13118	1	21	-18.91	UGCUCCUUCUACUUCUUUACCA&UGGUGGAGCCAAGGAGGAUCG	((.(((((((....((((((((&))))))))...))))))).))
Y73C8B.1.1	WBGene00022258	Y73C8B.1	63	82	PAO_13118	1	19	-11.07	AUUUUCCAUCCUACCCGCCA&UGGUGGAGCCAAGGAGGAU	(((((((.......((((((&))))))......)))))))
Y58A7A.5.1	WBGene00021979	Y58A7A.5	873	890	PAO_13118	4	22	-12.54	UCGAUCUUGCUGCCUUCA&UGGAGCCAAGGAGGAUCGA	((((((((.(((.(((((&))))).)).).))))))))
Y54F10AM.5.1	WBGene00021849	Y54F10AM.5	87	107	PAO_13118	1	16	-15.58	CUCCAUGGCUCAAAUCCAUCG&UGGUGGAGCCAAGGAG	((((.((((.....(((((((&))))))))))).))))
Y54E10A.17a.1	WBGene00021835	Y54E10A.17	510	527	PAO_13118	1	17	-16.63	UCUCUUUUGCUCACUCCA&UGGUGGAGCCAAGGAGG	(((((((.((((.(.(((&))).))))).)))))))
Y53G8B.2.1	WBGene00021818	Y53G8B.2	755	767	PAO_13118	3	16	-14.48	CUCACGGCUCCGC&GUGGAGCCAAGGAG	(((..((((((((&))))))))...)))
Y50D4B.2a.1	WBGene00021741	Y50D4B.2	221	241	PAO_13118	1	21	-16.3	UGAUUCUCUGGGGUGCUAUCA&UGGUGGAGCCAAGGAGGAUCG	(((((((((..(((.((((((&)))))).)))..)))))))))
Y49C4A.8a.1	WBGene00021709	ugt-29	969	986	PAO_13118	2	20	-15.43	GACAAUUUUGGCUUCAUC&GGUGGAGCCAAGGAGGAUC	(((..(((((((((((((&)))))))))))))..).))
Y48G8AL.5a.1	WBGene00021686	nsun-2	527	544	PAO_13118	2	17	-17.37	CUUCUUUUGGCUCCAACU&GGUGGAGCCAAGGAGG	(((((((.(((((((.((&))))))))))))))))
Y46H3D.6a.1	WBGene00021610	nhr-237	670	689	PAO_13118	1	17	-14.65	CCAUACUGGAGGCUUCACCA&UGGUGGAGCCAAGGAGG	((...((...((((((((((&)))))))))).))..))
Y22D7AL.10.1	WBGene00021248	Y22D7AL.10	492	510	PAO_13118	2	18	-17.28	UUUUCCUUGAUUUUUCGCC&GGUGGAGCCAAGGAGGA	(((((((((...(((((((&))))))).)))))))))
W10D9.5b.1	WBGene00021133	tomm-22	251	274	PAO_13118	2	22	-11.61	UUGAUCUUUUCCUAGAUUUUCCCC&GGUGGAGCCAAGGAGGAUCGA	(((((((..((((.(...((((((&)).)))).).)))))))))))
W03G1.5.1	WBGene00021011	W03G1.5	613	631	PAO_13118	2	20	-16.1	GAUCUUCCCGAUCUCCAUC&GGUGGAGCCAAGGAGGAUC	((((((((....(((((((&)))))))....))))))))
W02F12.2.1	WBGene00020947	W02F12.2	773	789	PAO_13118	3	22	-16.6	UCGAUCUUCUCGUUCCC&GUGGAGCCAAGGAGGAUCGA	((((((((((.((((((&).)))))...))))))))))
R151.9.1	WBGene00020112	pfd-5	529	548	PAO_13118	2	23	-13.68	UUCGAUUUUAAUACUACACC&GGUGGAGCCAAGGAGGAUCGAA	(((((((((..(.((.((((&)))).))...)..)))))))))
R08F11.3.1	WBGene00019967	cyp-33C8	1494	1512	PAO_13118	3	21	-20.38	CGGUCUUCCAUCGCUCGAC&GUGGAGCCAAGGAGGAUCG	(((((((((.(.((((.((&)).)))).).)))))))))
R02E12.6.1	WBGene00019830	hrg-1	736	758	PAO_13118	1	21	-17.85	CGCUCUUGGCCGCCGCUCCACCA&UGGUGGAGCCAAGGAGGAUCG	((.((((..((...(((((((((&)))))))))...)))))).))
M60.7.1	WBGene00019782	M60.7	1464	1484	PAO_13118	1	21	-19.46	UGUUUUUCUUUGAAUCCAUCA&UGGUGGAGCCAAGGAGGAUCG	((.(((((((((..(((((((&)))))))..))))))))).))
M04F3.4b.1	WBGene00019770	M04F3.4	656	678	PAO_13118	3	22	-16.08	UCUUUCCUCCUCGGAUUCUUCGC&GUGGAGCCAAGGAGGAUCGA	((..(((((((.((...((((((&)))))))).)))))))..))
K11G9.1.1	WBGene00019652	cest-34	1503	1518	PAO_13118	2	22	-14.13	UCGAUCCGGCCCGUCC&GGUGGAGCCAAGGAGGAUCGA	(((((((((((((.((&))))).))).....)))))))
K09F6.10.1	WBGene00019593	K09F6.10	2234	2256	PAO_13118	1	23	-18.61	UUCAUCUUCCUCAUCCUCUUCCA&UGGUGGAGCCAAGGAGGAUCGAA	(((((((((((....((((.(((&))).))))...)))))))).)))
K08D9.4a.1	WBGene00019525	K08D9.4	73	92	PAO_13118	1	19	-13.72	AUUUUCCACGCUACCCGCCA&UGGUGGAGCCAAGGAGGAU	(((((((..(((..((((((&)))))))))...)))))))
K06A5.6.1	WBGene00019433	acdh-3	5	22	PAO_13118	2	19	-19.17	GUCUUCCUUGUCUCGGUC&GGUGGAGCCAAGGAGGAU	((((((((((.(((.(((&))).))).))))))))))
K02F2.2.1	WBGene00019322	ahcy-1	247	271	PAO_13118	2	19	-19.01	GUCUUCCUGCAACAUCUUCUCCACC&GGUGGAGCCAAGGAGGAU	((((((((..........(((((((&)))))))...))))))))
H06H21.6.1	WBGene00019163	ubxn-6	1176	1196	PAO_13118	2	19	-11.16	AUCUGCAUCGUUGGCUCAACU&GGUGGAGCCAAGGAGGAU	((((...((.(((((((.(((&))).))))))).))))))
F59B1.8.1	WBGene00019100	F59B1.8	555	578	PAO_13118	4	23	-11.31	UUUGAAGGCUCUUGCAAGGCUCCA&UGGAGCCAAGGAGGAUCGAA	(((((....((((.(..(((((((&)))))))..).)))))))))
F58F9.7.1	WBGene00019060	acox-3	253	271	PAO_13118	3	21	-12.12	CGAUCUUGAAAACUUCCAU&GUGGAGCCAAGGAGGAUCG	(((((((......((((((&))))))......)))))))
F57B10.3a.1	WBGene00019001	ipgm-1	1372	1390	PAO_13118	1	19	-16.84	GUGCAACUUUGCUCCACCA&UGGUGGAGCCAAGGAGGAU	((.(..(((.(((((((((&))))))))).)))..).))
F56C11.6a.1	WBGene00018958	cest-27	1336	1356	PAO_13118	3	18	-19.3	UCUUCCGUUUUUGGGCUCCAC&GUGGAGCCAAGGAGGA	((((((.......((((((((&))))))))..))))))
F54D11.1.1	WBGene00018811	pmt-2	1471	1490	PAO_13118	1	18	-16.31	UCUUCCUUGCCCAAAAACCA&UGGUGGAGCCAAGGAGGA	((((((((((((....((((&)))))).)).))))))))
F54A5.2a.1	WBGene00018787	cutl-20	1096	1121	PAO_13118	1	23	-19.15	UUCGUCUUCUUCUUCUUCUUCUGCCA&UGGUGGAGCCAAGGAGGAUCGAA	((((..((((((((....((((((((&))))))))..)))))))).))))
F53C3.6a.1	WBGene00018750	F53C3.6	835	861	PAO_13118	1	23	-18.45	UUCGAUCUUUCAACCGGUUUUAAAUCA&UGGUGGAGCCAAGGAGGAUCGAA	(((((((((((....((((((..((((&))))))))))..)))))))))))
F52E4.5.1	WBGene00018702	F52E4.5	721	733	PAO_13118	1	19	-9.78	GUUCUCUUCCCCA&UGGUGGAGCCAAGGAGGAU	(((((((((((((&))).))).....)))))))
F44E7.8a.1	WBGene00018430	nhr-142	645	653	PAO_13118	1	9	-15.46	GCUCCACCA&UGGUGGAGC	(((((((((&)))))))))
F44C8.1.1	WBGene00018413	cyp-33C4	1227	1243	PAO_13118	1	19	-9.49	AUCUUCCCAGACCCCUA&UGGUGGAGCCAAGGAGGAU	(((((((..(.((((((&))).)).).)..)))))))
F41G3.10.1	WBGene00018303	F41G3.10	396	416	PAO_13118	1	22	-9.74	UCGAUUUGACAAACCCAACCA&UGGUGGAGCCAAGGAGGAUCGA	(((((((..(...(((.((((&)))))).)....)..)))))))
F41C3.5.1	WBGene00018271	ctsa-1.1	217	235	PAO_13118	2	20	-11.75	GCUCUUCCUUGGACGGACU&GGUGGAGCCAAGGAGGAUC	(.((((((((((.(..(((&)))...))))))))))).)
F41B5.4.1	WBGene00018262	cyp-33C3	201	223	PAO_13118	1	20	-19.4	GAUCCUUUUAUUGGUUUUCACCG&UGGUGGAGCCAAGGAGGAUC	((((((((..(((((.(((((((&))))))))))))))))))))
F28C10.3.1	WBGene00017898	F28C10.3	327	345	PAO_13118	3	20	-18.79	GAUCCUCACCACAAUCCAC&GUGGAGCCAAGGAGGAUC	(((((((.......(((((&)))))......)))))))
F28A12.4.1	WBGene00017881	asp-13	785	800	PAO_13118	6	20	-18.09	GAUUUUCUCUUGGCUC&GAGCCAAGGAGGAUC	(((((((.((((((((&)))))))))))))))
F28A10.6.1	WBGene00017874	acdh-9	1332	1340	PAO_13118	12	20	-12.75	GAUUUUCCU&AGGAGGAUC	(((((((((&)))))))))
F22A3.6c.1	WBGene00017691	ilys-5	67	89	PAO_13118	2	21	-15.97	CGUUUCCGCCGACUGCCUCCACU&GGUGGAGCCAAGGAGGAUCG	((..(((.((...((.(((((((&))))))).)).)).))).))
F21F8.11.1	WBGene00017681	slc-17.5	873	891	PAO_13118	1	18	-17.58	UCCUCCAAAACAUCCAUCA&UGGUGGAGCCAAGGAGGA	((((((......(((((((&))))))).....))))))
F18E3.11.1	WBGene00017567	F18E3.11	111	129	PAO_13118	1	18	-15.82	UUCUGCUUCGUCUUCAUCA&UGGUGGAGCCAAGGAGGA	((((.(((.(.((((((((&))))))))).))).))))
F16B4.9.1	WBGene00017510	nhr-178	411	430	PAO_13118	1	20	-15.98	GACCUACCUUCACUUCAUCA&UGGUGGAGCCAAGGAGGAUC	(((((.((((..((((((((&))))))))..))))))).))
F15E6.6.1	WBGene00017487	F15E6.6	977	990	PAO_13118	3	19	-18.39	AUUCUCCUCUCCAC&GUGGAGCCAAGGAGGAU	((((((((((((((&))))))...))))))))
F14F9.4.1	WBGene00017467	F14F9.4	24	43	PAO_13118	2	22	-20.6	UCGUCUUCUUUGGAACCAUC&GGUGGAGCCAAGGAGGAUCGA	(((((((((((((..(((((&)))))..)))))))))).)))
F13C5.1.1	WBGene00017422	F13C5.1	750	769	PAO_13118	1	22	-19.73	UCAUCCUCCUCAUCUACACA&UGGUGGAGCCAAGGAGGAUCGA	((((((((((..(((((.((&)))))))....)))))))).))
F10E7.8a.1	WBGene00017349	farl-11	1416	1436	PAO_13118	1	20	-23.78	GAUUCUCCAGGCGCUUCAUCA&UGGUGGAGCCAAGGAGGAUC	((((((((..(.(((((((((&))))))))))..))))))))
F09F7.8.1	WBGene00017305	nspb-12	112	131	PAO_13118	2	22	-17.62	UCGGCCGCCUAUGUUCCAUC&GGUGGAGCCAAGGAGGAUCGA	((((((.(((..((((((((&))))))))..))).)).))))
F09E5.3.1	WBGene00017283	F09E5.3	858	874	PAO_13118	3	19	-20.46	AUCCUCACUUGUUCCGC&GUGGAGCCAAGGAGGAU	((((((.((((((((((&))))))).)))))))))
F07F6.8.1	WBGene00017220	F07F6.8	982	1005	PAO_13118	1	23	-18.28	UUUGAAUUUUUCUGGGUUUCACUA&UGGUGGAGCCAAGGAGGAUCGAA	(((((.(((((((.((((((((((&)))))))))).))))))))))))
DC2.5a.1	WBGene00017082	DC2.5	656	675	PAO_13118	1	23	-20.66	UUCGAUCGUCAGCUCCAUCA&UGGUGGAGCCAAGGAGGAUCGAA	(((((((.((.(((((((((&)))))))))....)).)))))))
D2096.8.1	WBGene00017075	nap-1	801	817	PAO_13118	1	16	-16.03	UUCCUUGAGCUCGACUA&UGGUGGAGCCAAGGAG	(((((((.((((.((((&)))).)))))))))))
D2063.1.1	WBGene00017060	D2063.1	14	36	PAO_13118	2	19	-12.85	AUCUUCUCAACAAUGGUUUCAUC&GGUGGAGCCAAGGAGGAU	(((((((......((((((((((&)))))))))).)))))))
CD4.7b.1	WBGene00016992	zhit-1	514	520	PAO_13118	11	17	-9.99	CCUCCUU&AAGGAGG	(((((((&)))))))
C54G7.2.1	WBGene00016934	mboa-3	775	798	PAO_13118	2	23	-12.8	UUCCAUUCUUCCAGUGGUUCUUCU&GGUGGAGCCAAGGAGGAUCGAA	(((.(((((((...(((((((.((&)).))))))).))))))).)))
C49G7.3.1	WBGene00016781	C49G7.3	59	80	PAO_13118	3	22	-21.37	UUGAUUGCUUUUCUGGCUCCAC&GUGGAGCCAAGGAGGAUCGA	((((((.(((((.(((((((((&))))))))))))))))))))
C49A9.8.1	WBGene00016762	ugt-24	1060	1081	PAO_13118	3	23	-21.34	UUCAUUUCUUCUUGGCUGCCAC&GUGGAGCCAAGGAGGAUCGAA	(((..((((((((((((.((((&))))))))))))))))..)))
C44B7.10.1	WBGene00016630	acer-1	388	414	PAO_13118	2	23	-14.93	UUCAUGCUUCUUGUACGAAGUUCCACU&GGUGGAGCCAAGGAGGAUCGAA	(((((.(((((((......((((((((&))))))))))))))).)).)))
C37H5.3a.1	WBGene00016507	abhd-5.2	783	799	PAO_13118	4	21	-19.05	CGAUCCUUGGGGCUUCA&UGGAGCCAAGGAGGAUCG	((((((((..(((((((&)))))))...))))))))
C35B1.2a.1	WBGene00016432	C35B1.2	981	989	PAO_13118	13	21	-15.05	CGAUCCUCU&GGAGGAUCG	(((((((((&)))))))))
C29F5.1.1	WBGene00016210	C29F5.1	798	818	PAO_13118	1	20	-12.33	GAUAAAUCUGAAGUUCUGCCA&UGGUGGAGCCAAGGAGGAUC	(((...(((...(((((((((&)))))))))...)))..)))
C23H5.8b.1	WBGene00016027	C23H5.8	565	582	PAO_13118	2	18	-13.53	UCCUACUGUAUCUCUACC&GGUGGAGCCAAGGAGGA	((((.((....(((((((&)))))))....))))))
C17C3.1b.1	WBGene00015887	C17C3.1	11	40	PAO_13118	1	23	-17.58	UUCGAUACUCUUUUCCUUGUUUUCUCAUCA&UGGUGGAGCCAAGGAGGAUCGAA	(((((.....(((((((((..(((.(((((&)))))))).))))))))))))))
C15B12.8.1	WBGene00015788	C15B12.8	878	898	PAO_13118	1	21	-16.19	CGAUCCCAGGAAGCUUUAUCA&UGGUGGAGCCAAGGAGGAUCG	(((((((.....(((((((((&)))))))))....).))))))
C12D5.7.1	WBGene00015709	cyp-33A1	306	323	PAO_13118	1	18	-23.09	UUCUCCUAUCCUCCACCA&UGGUGGAGCCAAGGAGGA	(((((((...((((((((&))))))))...)))))))
C10H11.4.1	WBGene00015693	ugt-28	801	823	PAO_13118	1	23	-17.53	UUCAAUUUUCUUUGUCAACGCCA&UGGUGGAGCCAAGGAGGAUCGAA	(((.((((((((((.(..(((((&)))))..).)))))))))).)))
C07G3.2.1	WBGene00015574	irg-1	96	107	PAO_13118	4	17	-11.51	CCUCCGGCUUUG&UGGAGCCAAGGAGG	((((((((((((&)))))))..)))))
C07D10.2a.1	WBGene00015567	bath-44	1386	1414	PAO_13118	2	23	-18.42	UUCGACCUCUUUUUCAUUUUCUGCCCAUC&GGUGGAGCCAAGGAGGAUCGAA	((((((((((((..........(((((((&))))).)).))))))).)))))
C06E7.1a.1	WBGene00015538	sams-3	120	137	PAO_13118	6	22	-14.97	UUGAUGCUCAUUUGGCUC&GAGCCAAGGAGGAUCGA	(((((.(((.((((((((&))))))))))).)))))
C06A8.1b.1	WBGene00015512	mthf-1	134	149	PAO_13118	3	22	-15.83	UCGAUUCUCUGUCCAC&GUGGAGCCAAGGAGGAUCGA	((((((((((((((((&))))).)...))))))))))
C01B12.3.1	WBGene00015286	best-3	1895	1912	PAO_13118	2	20	-10.69	GAUCCCUUUCAUUUCAUU&GGUGGAGCCAAGGAGGAUC	(((((((((..(((((((&)))))))..)))).)))))
B0361.8.1	WBGene00015162	algn-11	469	491	PAO_13118	1	22	-14.09	UCGAUUCAAUGGGAUAUCCACUA&UGGUGGAGCCAAGGAGGAUCGA	(((((((....((...(((((((&))))))).)).....)))))))
B0205.6.1	WBGene00015021	nfs-1	1012	1027	PAO_13118	4	17	-16.58	CCUUCUGAUGGCUCUA&UGGAGCCAAGGAGG	((((((..((((((((&))))))))))))))
K08E5.1b.1	WBGene00014801	K08E5.1	648	654	PAO_13118	13	19	-8.95	GUCCUUC&GGAGGAU	(((((((&)))))))
ZK1320.4.1	WBGene00014254	cyp-13A10	1149	1168	PAO_13118	2	23	-16	UUCGAUACAACUGCUCUAUC&GGUGGAGCCAAGGAGGAUCGAA	((((((.(..((((((((((&))))))))..))..).))))))
ZK896.5.1	WBGene00014136	ZK896.5	1103	1120	PAO_13118	1	20	-21.18	GAUUCUUCUCCUCCGCCA&UGGUGGAGCCAAGGAGGAUC	(((((((((.((((((((&))))))))...)))))))))
ZK822.5a.1	WBGene00014092	ZK822.5	539	562	PAO_13118	3	23	-21.74	UUUGGUUUUAAUCUUUGGCUGCAC&GUGGAGCCAAGGAGGAUCGAA	((((((((...(((((((((.(((&))).)))))))))))))))))
ZK632.3.1	WBGene00014012	riok-3	1628	1653	PAO_13118	2	23	-14.33	UUUUUUGCUCCUUUGGUUUGUUUACU&GGUGGAGCCAAGGAGGAUCGAA	(((..(.((((.(((((((...((((&))))))))))))))).)..)))
ZK617.2.1	WBGene00014009	lips-6	706	727	PAO_13118	1	20	-16.57	GCAUUCAACUUGGCAUCCACUG&UGGUGGAGCCAAGGAGGAUC	(.((((..((((((.(((((((&)))))))))))))..)))))
ZC376.7a.1	WBGene00013878	atfs-1	1683	1705	PAO_13118	1	23	-15.53	UUCGAUCCCAAAUUUCCCAUCCA&UGGUGGAGCCAAGGAGGAUCGAA	(((((((((.......(((.(((&)))))).......).))))))))
Y73F4A.2.1	WBGene00013515	Y73F4A.2	69	92	PAO_13118	1	23	-15.37	UUCUUUUUGCCUUUGCAUCCGCCA&UGGUGGAGCCAAGGAGGAUCGAA	(((..(((.((((.((.(((((((&))))))))).)))).)))..)))
Y60A3A.7.1	WBGene00013358	abhd-3.1	1113	1123	PAO_13118	13	23	-15.23	UUUGAUCUUCC&GGAGGAUCGAA	(((((((((((&)))))))))))
Y57G11C.34.1	WBGene00013324	mrps-7	714	735	PAO_13118	1	22	-13.82	UCGUUUCUCUUUUGUUUUGUUA&UGGUGGAGCCAAGGAGGAUCGA	(((.((((((((.(((((((((&))))))))).)))))))).)))
Y57A10C.6.1	WBGene00013284	daf-22	576	596	PAO_13118	1	19	-10.59	AUCCAAAAUCCCAGUUCACCA&UGGUGGAGCCAAGGAGGAU	((((....(((...(((((((&))))))).....)))))))
Y51A2D.9b.1	WBGene00013077	ttr-24	19	35	PAO_13118	2	22	-11.82	UCGAUUCCCGGUCGACU&GGUGGAGCCAAGGAGGAUCGA	(((((((((((((.(((&))).)).))..)).)))))))
Y46G5A.18a.1	WBGene00012908	Y46G5A.18	543	561	PAO_13118	3	21	-16.08	CGACUUCAUCCGGCUCCGC&GUGGAGCCAAGGAGGAUCG	(((.(((.(((((((((((&))))))))..)))))))))
Y38F1A.6.1	WBGene00012608	hphd-1	963	989	PAO_13118	2	23	-15.19	UUCGUCCACUUUAUCAAGGUUCCAACC&GGUGGAGCCAAGGAGGAUCGAA	(((((((.((((.....(((((((.((&))))))))))))).))).))))
W09H1.5.1	WBGene00012375	mecr-1	424	437	PAO_13118	1	16	-18.18	CUCGGGCUCCACCA&UGGUGGAGCCAAGGAG	(((.((((((((((&))))))))))...)))
R107.5a.1	WBGene00011300	R107.5	709	725	PAO_13118	1	16	-18.73	CUCCAAUGGCUUCGCCA&UGGUGGAGCCAAGGAG	((((..(((((((((((&))))))))))).))))
R53.4.1	WBGene00011273	R53.4	396	427	PAO_13118	1	22	-21.17	UCGUUCCUCAAUUGGCUCGUCAAGUCUCACCG&UGGUGGAGCCAAGGAGGAUCGA	(((.(((((..(((((((.........(((((&)))))))))))).))))).)))
R11A5.4a.1	WBGene00011232	pck-2	108	139	PAO_13118	1	23	-17.49	UUCGUCUCUUCUUUCCGUGUGCUCUUAAACCA&UGGUGGAGCCAAGGAGGAUCGAA	((((..(((((((....((.(((((...((((&)))))))))))))))))).))))
R07E5.2.1	WBGene00011110	prdx-3	205	225	PAO_13118	2	23	-19.15	UUCUAUCCACUUGACUUCACC&GGUGGAGCCAAGGAGGAUCGAA	(((.((((.((((.(((((((&))))))).))))..)))).)))
R07E3.1a.1	WBGene00011102	R07E3.1	871	898	PAO_13118	1	22	-20.85	UCGAUCUUCCAUAUGUAGCUCAUCGCCA&UGGUGGAGCCAAGGAGGAUCGA	((((((((((...((..((((..(((((&))))))))))).))))))))))
R04B5.6.1	WBGene00011004	R04B5.6	340	360	PAO_13118	1	21	-13.49	CGUUUUUUCGCUACUCCACCA&UGGUGGAGCCAAGGAGGAUCG	((.((((((....((((((((&))))))))....)))))).))
R03D7.1.1	WBGene00010988	metr-1	699	715	PAO_13118	1	17	-17.34	UUUCCUUGUGUCCACCA&UGGUGGAGCCAAGGAGG	((((((((..(((((((&)))))))..))))))))
M88.1.1	WBGene00010904	ugt-62	782	791	PAO_13118	12	21	-13.97	CGAUCUUCCU&AGGAGGAUCG	((((((((((&))))))))))
M05D6.6.2	WBGene00010879	taap-1	46	67	PAO_13118	1	19	-18.03	AUCUUCCUUUAGGUUCUUGCUA&UGGUGGAGCCAAGGAGGAU	(((((((((..(((((.(((((&)))))))))))))))))))
K12G11.3.1	WBGene00010790	sodh-1	869	878	PAO_13118	13	22	-15.81	UCGGUCUUCC&GGAGGAUCGA	((((((((((&))))))))))
K09A9.1.1	WBGene00010700	nipi-3	1113	1131	PAO_13118	4	21	-14.63	CGUUCCAUUCAUGGCUCCG&UGGAGCCAAGGAGGAUCG	((.(((.(((.((((((((&)))))))).)))))).))
K07C5.4.1	WBGene00010627	nol-56	619	640	PAO_13118	1	18	-14.78	UCUUCCGUCUGGCUCCAGAUCA&UGGUGGAGCCAAGGAGGA	((((((...((((((((..(((&))))))))))).))))))
K02A11.3.1	WBGene00010488	endu-1	470	485	PAO_13118	3	17	-10.34	CAACUUUGGUUUUCAC&GUGGAGCCAAGGAGG	(..((((((((.((((&))))))))))))..)
K01D12.10.1	WBGene00010469	K01D12.10	64	72	PAO_13118	1	9	-13.24	GCUCCAUCA&UGGUGGAGC	(((((((((&)))))))))
F59A2.3.1	WBGene00010303	cri-3	559	575	PAO_13118	3	22	-15.54	UCGAUCCAGACCUCCAC&GUGGAGCCAAGGAGGAUCGA	(((((((...(((((((&))))))....)..)))))))
F54D5.12.1	WBGene00010055	F54D5.12	566	579	PAO_13118	6	19	-15.07	AUCUUCUCGGGCUC&GAGCCAAGGAGGAU	(((((((..(((((&)))))..)))))))
F53F4.10.1	WBGene00009992	F53F4.10	213	230	PAO_13118	2	21	-11.27	UGGUGCUCUUAUUCCACU&GGUGGAGCCAAGGAGGAUCG	((((.(((((.(((((((&)))))))...))))).))))
F53A2.7.1	WBGene00009952	acaa-2	1290	1300	PAO_13118	13	23	-11.43	UUCCAUCUUCC&GGAGGAUCGAA	(((.(((((((&))))))).)))
F49E12.9a.1	WBGene00009902	drd-1	794	814	PAO_13118	1	21	-15.96	CGGUUCUUUUAGGUCCAACUA&UGGUGGAGCCAAGGAGGAUCG	((((((((((.(((((.((((&))))))).)).))))))))))
F44G3.2.1	WBGene00009706	argk-1	911	923	PAO_13118	2	14	-14.72	CCUUGGUUCAACU&GGUGGAGCCAAGG	(((((((((.(((&))).)))))))))
F44A6.5.1	WBGene00009677	F44A6.5	623	640	PAO_13118	1	19	-17.43	AUCCUGCUGCCUCCGCUG&UGGUGGAGCCAAGGAGGAU	(((((.(((.((((((((&)))))))).).)).)))))
F32D8.12a.1	WBGene00009334	F32D8.12	1183	1189	PAO_13118	13	19	-11.64	AUCCUCC&GGAGGAU	(((((((&)))))))
F28F8.2.1	WBGene00009221	acs-2	599	625	PAO_13118	1	19	-15.41	AUCCCAUGACAUCCCAGAGCUCCGCCA&UGGUGGAGCCAAGGAGGAU	((((.......(((..(.(((((((((&))))))))))..)))))))
F27D4.1.1	WBGene00009187	F27D4.1	268	292	PAO_13118	2	19	-13.27	AUCUUCCAGAACGAGUGGCUCCAGU&GGUGGAGCCAAGGAGGAU	(((((((........((((((((.(&).)))))))).)))))))
F22B5.4.1	WBGene00009042	F22B5.4	256	274	PAO_13118	1	19	-13.24	AUCAAUUCCUUGUCCGCCG&UGGUGGAGCCAAGGAGGAU	(((..((((((((((((((&)))))))..))))))))))
F14F7.3.1	WBGene00008810	cyp-13A12	1098	1115	PAO_13118	2	18	-18.86	UCCUCCUGGCAACUCACC&GGUGGAGCCAAGGAGGA	((((((((((...(((((&))))).))).)))))))
F11C1.5a.1	WBGene00008694	vwa-8	1257	1281	PAO_13118	3	22	-16.32	UCGAGAAUCCUUGGCGAACUUUCAC&GUGGAGCCAAGGAGGAUCGA	((((...((((((((.....(((((&)))))))))))))...))))
F09F3.6.1	WBGene00008628	ttr-21	240	255	PAO_13118	1	19	-18.46	AUGCUCCUCUCCAUCA&UGGUGGAGCCAAGGAGGAU	((.(((((((((((((&))))))))...))))).))
F09B12.3.1	WBGene00008607	F09B12.3	602	616	PAO_13118	2	17	-16.74	CCUACGAGCUUCACC&GGUGGAGCCAAGGAGG	(((.(..((((((((&))))))))...).)))
F08H9.6.1	WBGene00008594	clec-57	1203	1234	PAO_13118	1	23	-14.21	UUCAAUCUUCCAACUUGAUCUUAAUACCACCA&UGGUGGAGCCAAGGAGGAUCGAA	(((.(((((((...(((..((.....((((((&)))))))).)))))))))).)))
F08A8.3.1	WBGene00008566	acox-1.3	1854	1871	PAO_13118	2	20	-15.27	GAUCUGUUCUUGGCCGCC&GGUGGAGCCAAGGAGGAUC	(((((.((((((((((((&))))..)))))))))))))
F02A9.4.1	WBGene00008514	mrpl-44	1553	1572	PAO_13118	5	22	-20.27	UUUGUCCUCCCAUCGGCUCC&GGAGCCAAGGAGGAUCGA	((.(((((((....((((((&))))))..))))))).))
E03H4.7.1	WBGene00008475	oac-13	771	790	PAO_13118	2	21	-19.5	CUUUCCUCUGAAGCUUCAUC&GGUGGAGCCAAGGAGGAUCG	(..((((((...((((((((&))))))))...))))))..)
DH11.2.1	WBGene00008436	DH11.2	825	847	PAO_13118	1	22	-13.03	UCGAUAAACGAAAAGCUUCACCG&UGGUGGAGCCAAGGAGGAUCGA	(((((...(.....(((((((((&)))))))))...)....)))))
D1025.4.1	WBGene00008356	nspc-20	46	69	PAO_13118	2	23	-14.26	UUCGCAUCCUUGCUGCUCUCUGCU&GGUGGAGCCAAGGAGGAUCGAA	((((.((((((.((...(((((((&)))))))...))))))))))))
C55A6.5.1	WBGene00008334	sdz-8	464	485	PAO_13118	1	22	-21.91	UCAUCUGGACUUGGUUCCAUCA&UGGUGGAGCCAAGGAGGAUCGA	((((((...(((((((((((((&)))))))))))))..)))).))
C54D10.1.1	WBGene00008296	cdr-2	360	374	PAO_13118	1	19	-12.48	AUCCCAUCUCUACCA&UGGUGGAGCCAAGGAGGAU	(((((..((((((((&)))))))).....).))))
C52G5.2.1	WBGene00008260	C52G5.2	375	395	PAO_13118	1	22	-12.89	UUGAUCCAGUUGGAAACGCCA&UGGUGGAGCCAAGGAGGAUCGA	(((((((..((((...(((((&)))))...))))...)))))))
C47E12.4a.1	WBGene00008149	pyp-1	1334	1353	PAO_13118	1	18	-19.08	UUCUUUUUGGUUUACCACCA&UGGUGGAGCCAAGGAGGA	((((((((((((..((((((&))))))))))))))))))
C37A5.1.1	WBGene00007988	best-8	1286	1298	PAO_13118	3	15	-17.83	UCCAUGGCUCCAC&GUGGAGCCAAGGA	(((.(((((((((&))))))))).)))
C36A4.9b.1	WBGene00007969	acs-19	79	101	PAO_13118	2	23	-20.35	UUCAGAUUUUCCUCCCUCCAGCC&GGUGGAGCCAAGGAGGAUCGAA	(((.(((((((((..(((((.((&)))))))...))))))))))))
C34C12.8.1	WBGene00007927	C34C12.8	726	745	PAO_13118	5	23	-14.02	UUUAAUUUUCCUCUGGUUUU&GGAGCCAAGGAGGAUCGAA	(((.((((((((.(((((((&))))))))))))))).)))
C33A12.3a.1	WBGene00007882	C33A12.3	239	261	PAO_13118	1	22	-18.65	UCGAUCCACCAGGAAUAACACCA&UGGUGGAGCCAAGGAGGAUCGA	(((((((.((.((.....(((((&)))))...))..)).)))))))
C31E10.7.1	WBGene00007848	cytb-5.1	353	373	PAO_13118	2	23	-15.48	UUCGCCCUUCUUGCUGUCAUU&GGUGGAGCCAAGGAGGAUCGAA	((((.((((((((((.(((((&)))))))).)))))))..))))
C30H6.7a.1	WBGene00007824	dlat-2	922	942	PAO_13118	2	21	-17.9	CGAUUCCUUCUUCACUUCUCC&GGUGGAGCCAAGGAGGAUCG	((((.(((((((..((((.((&)).))))..)))))))))))
C29F7.2a.1	WBGene00007811	C29F7.2	772	787	PAO_13118	3	20	-13.72	GAUCUUUGGGCCCCAC&GUGGAGCCAAGGAGGAUC	(((((((.(((.((((&)))).)))...)))))))
C27A7.5d.1	WBGene00007756	C27A7.5	77	95	PAO_13118	2	21	-18.07	CCAUUCUUUUGGCCCCGCC&GGUGGAGCCAAGGAGGAUCG	(.(((((((((((.(((((&))))).)))).))))))).)
C15C8.3a.1	WBGene00007605	hrg-7	580	600	PAO_13118	1	22	-14.2	UUGAUACUUUCUGUUUCACUA&UGGUGGAGCCAAGGAGGAUCGA	(((((.(((((((((((((((&)))))))))..)))))))))))
C14C10.3a.1	WBGene00007586	ril-2	1335	1354	PAO_13118	4	22	-15.94	UCUAUUUUCUCUGUGCUCUA&UGGAGCCAAGGAGGAUCGA	((.(((((((.((.((((((&)))))))).))))))).))
C14B1.3.1	WBGene00007574	C14B1.3	15	37	PAO_13118	2	23	-12.85	UUCCAUUCUCUGCGUCUCUCUCC&GGUGGAGCCAAGGAGGAUCGAA	(((.(((((((..(.((((..((&)).)))).)..))))))).)))
C14A4.14.1	WBGene00007564	mrps-22	533	558	PAO_13118	1	21	-15.77	CGAAUCGUUCUGUGAAUCCUCCACCA&UGGUGGAGCCAAGGAGGAUCG	(((.((.((((.((....((((((((&)))))))).)))))).)))))
C06H2.1.1	WBGene00007385	atp-5	615	641	PAO_13118	1	22	-20.56	UCGUUCUUCCUUAUCGCUCUCCUACCA&UGGUGGAGCCAAGGAGGAUCGA	(((.((((((((...(((((...((((&))))))))).)))))))).)))
C05C10.4.1	WBGene00007331	pho-11	418	438	PAO_13118	2	22	-15.88	UCCCCACUCACUUGGUUCCCU&GGUGGAGCCAAGGAGGAUCGA	((....(((.(((((((((((&)).))))))))))))....))
C01A2.4.1	WBGene00007216	C01A2.4	460	476	PAO_13118	5	22	-12.5	UCGAUUCUCGACGCACC&GGAGCCAAGGAGGAUCGA	(((((((((...((.((&)).))....)))))))))
B0564.1a.1	WBGene00007201	exos-4.1	509	521	PAO_13118	5	17	-17.31	CUUCUUUGGCUCU&GGAGCCAAGGAGG	(((((((((((((&)))))))))))))
B0457.6.1	WBGene00007180	B0457.6	426	446	PAO_13118	1	20	-23.65	GACUUCCUUGGUCUUCCACCA&UGGUGGAGCCAAGGAGGAUC	((((((((((((..(((((((&))))))))))))))))).))
B0399.2.1	WBGene00007177	oac-1	879	897	PAO_13118	2	20	-21.88	GAUGCUGUUUGGCUCCGCC&GGUGGAGCCAAGGAGGAUC	(((.((.((((((((((((&)))))))))))).)).)))
B0285.4.1	WBGene00007137	lcmt-1	739	760	PAO_13118	1	21	-17.81	CGAACUUCUGAUGCAUUCACCA&UGGUGGAGCCAAGGAGGAUCG	(((.(((((...((.(((((((&)))))))))...))))).)))
B0272.3.1	WBGene00007129	B0272.3	429	443	PAO_13118	2	16	-14.49	CUUCUUCACUUCGCC&GGUGGAGCCAAGGAG	((((((..(((((((&)))))))..))))))
C16A3.7.1	WBGene00007048	nfx-1	319	342	PAO_13118	1	23	-25.06	UUCGAUCCAUCUGUGCCUCCACCG&UGGUGGAGCCAAGGAGGAUCGAA	((((((((.(((.((.((((((((&)))))))).)).)))))))))))
W01A8.1b.1	WBGene00007024	plin-1	1299	1318	PAO_13118	2	23	-24.81	UUCCCCUCCUUCGCACCACC&GGUGGAGCCAAGGAGGAUCGAA	(((.(((((((.((.(((((&))))).)).)))))))...)))
K07E3.8.1	WBGene00006890	vem-1	116	130	PAO_13118	1	16	-19.53	CUCCCAGCUCCACCA&UGGUGGAGCCAAGGAG	((((..(((((((((&)))))))))...))))
C01G6.6a.1	WBGene00006510	mtrr-1	276	296	PAO_13118	1	21	-14.88	CGUUCUUCUCGGUCUCGGCGA&UGGUGGAGCCAAGGAGGAUCG	(((((((((.((.(((.((.(&).)).))))).))))))).))
E02H1.3.1	WBGene00006473	tag-124	875	883	PAO_13118	13	21	-15.93	CGAUCCUUC&GGAGGAUCG	(((((((((&)))))))))
C31C9.1a.1	WBGene00006404	tag-10	798	813	PAO_13118	5	20	-13.74	GAUCCUUCUUCACUCC&GGAGCCAAGGAGGAUC	((((((((((..((((&))))..))))))))))
K11D12.3a.1	WBGene00005655	srr-4	830	851	PAO_13118	1	21	-15.95	CUUUUCUGCUUCUUCUCCAUCA&UGGUGGAGCCAAGGAGGAUCG	(..((((.(((...((((((((&))))))))..))).))))..)
C27B7.1b.1	WBGene00005007	spr-2	1027	1057	PAO_13118	2	22	-13.16	UCGAUCCCGUUUUUGUAAGUAUUUAUUCACU&GGUGGAGCCAAGGAGGAUCGA	(((((((..((((((..........((((((&))))))..)))))))))))))
C54G6.5.1	WBGene00005002	spp-17	27	46	PAO_13118	2	22	-17.45	UCGUCCUUCUGCUCGUCGCC&GGUGGAGCCAAGGAGGAUCGA	((((((((((((((..((((&))))))))..))))))).)))
C28C12.7a.1	WBGene00004995	spp-10	594	611	PAO_13118	3	21	-14.62	CCAUUCUCCAAGAUCCAC&GUGGAGCCAAGGAGGAUCG	(.(((((((....(((((&))))).....))))))).)
Y71F9B.4.1	WBGene00004920	snr-7	92	112	PAO_13118	1	19	-17.1	AUCCUCCGCGGUUUCGAUCCA&UGGUGGAGCCAAGGAGGAU	(((((((..(((((((..(((&))))))))))..)))))))
F56E10.4.1	WBGene00004496	rps-27	164	182	PAO_13118	1	19	-15.94	GUCUUCUCGCACGCCACCA&UGGUGGAGCCAAGGAGGAU	(((((((.((...((((((&)))))).))...)))))))
C27A2.2a.1	WBGene00004434	rpl-22	297	314	PAO_13118	4	17	-14.16	CCUCCGUGAUUGGCUCCG&UGGAGCCAAGGAGG	(((((....(((((((((&))))))))))))))
C12D8.11.1	WBGene00004405	rop-1	1428	1444	PAO_13118	5	21	-20.81	CGAUACUGCUUGGCUCU&GGAGCCAAGGAGGAUCG	((((.((.(((((((((&))))))))).)).))))
D2023.2a.1	WBGene00004258	pyc-1	17	37	PAO_13118	1	21	-18.45	CGGUUCUCCCGCAUCCCACCG&UGGUGGAGCCAAGGAGGAUCG	(((((((((.((...((((((&)))))).))...)))))))))
Y37E3.9.1	WBGene00004014	phb-1	313	332	PAO_13118	2	22	-16.85	UCGUCUUCCAAACAUCUACC&GGUGGAGCCAAGGAGGAUCGA	(((((((((.....((((((&)))))).....))))))).))
F22E10.3.1	WBGene00004008	pgp-14	421	439	PAO_13118	1	17	-20.57	CCUUCUUGUCUAUCCACCA&UGGUGGAGCCAAGGAGG	((((((((....(((((((&)))))))..))))))))
C47A10.1.1	WBGene00004003	pgp-9	2936	2957	PAO_13118	2	23	-18.09	UUCAUUCUCCUUUGGUACUAUU&GGUGGAGCCAAGGAGGAUCGAA	((((((((((((.(((.(((((&))))).)))))))))))).)))
C05A9.1b.1	WBGene00003999	pgp-5	22	41	PAO_13118	3	22	-19.84	UUUUUCCUUGUUGGCUUUGC&GUGGAGCCAAGGAGGAUCGA	((..(((((.((((((((((&)))))))))).)))))..))
F42E11.1a.1	WBGene00003998	pgp-4	2393	2413	PAO_13118	2	23	-19.47	UUCGUUCUUCUGGCUGUUACC&GGUGGAGCCAAGGAGGAUCGAA	(((((((((((((((.(((((&))))))))).))))))).))))
K08E7.9.1	WBGene00003995	pgp-1	2527	2546	PAO_13118	1	23	-14.08	UUGGAUUCUUCGAUUCACCA&UGGUGGAGCCAAGGAGGAUCGAA	((.((((((((..(((((((&))))))).....)))))))).))
F54C1.7.1	WBGene00003934	pat-10	33	39	PAO_13118	2	8	-9.62	CUCCGCC&GGUGGAG	(((((((&)))))))
M117.2a.2	WBGene00003920	par-5	890	909	PAO_13118	4	23	-17.06	UUCGGUCUUCAAGUGCUCUA&UGGAGCCAAGGAGGAUCGAA	((((((((((....((((((&))))))....))))))))))
C52B9.7a.1	WBGene00003907	paf-2	247	264	PAO_13118	1	19	-15.37	AUCCAUUAUGGCUUCCUA&UGGUGGAGCCAAGGAGGAU	((((.((.((((((((((&))).))))))).)).))))
K11C4.4.1	WBGene00003844	odc-1	726	746	PAO_13118	2	20	-17.71	GAUCCUCCGCAUUGCUGUAUC&GGUGGAGCCAAGGAGGAUC	((((((((.....(((.((((&)))).)))...))))))))
C15H11.3.1	WBGene00003834	nxf-1	1962	1988	PAO_13118	1	23	-16.46	UUCCCCUCUUUCGAACUAGCUCCUCCA&UGGUGGAGCCAAGGAGGAUCGAA	(((.(((((((.(.....(((((.(((&))).)))))))))))))...)))
VC5.5.1	WBGene00003725	nhr-135	87	101	PAO_13118	4	19	-14.12	GUCACUUUGGCUCUA&UGGAGCCAAGGAGGAU	(((.(((((((((((&)))))))))))..)))
C06G3.1a.1	WBGene00003695	nhr-105	610	626	PAO_13118	1	19	-14.34	GUCCUCCAUCAAUACCA&UGGUGGAGCCAAGGAGGAU	(((((((.....(((((&))))).......)))))))
H12C20.3a.1	WBGene00003658	nhr-68	2	20	PAO_13118	1	21	-11.4	CGGUUCUAAUCCUCCGUCA&UGGUGGAGCCAAGGAGGAUCG	(((((((..(.((((((((&))))))))...)..)))))))
ZC155.1.1	WBGene00003588	nex-1	122	144	PAO_13118	1	22	-13.7	UCGAUCUCCAACGCUCAGCGCCA&UGGUGGAGCCAAGGAGGAUCGA	(((((((((...((((..(((((&)))))))))...)).)))))))
F57C12.4.1	WBGene00003408	mrp-2	3703	3719	PAO_13118	5	21	-15.17	UGAUUCUCCUGGACUCU&GGAGCCAAGGAGGAUCG	((((((((((((.((((&))))))).)))))))))
C05D11.11a.1	WBGene00003214	mel-32	200	218	PAO_13118	3	22	-17.97	UGGAUGCUCUUGGCUCGGC&GUGGAGCCAAGGAGGAUCGA	(.(((.((((((((((.((&)).))))))).))).))).)
F58B3.1.1	WBGene00003093	lys-4	82	102	PAO_13118	2	20	-13.05	GUUCUUCGUCUCGGCUUUGCU&GGUGGAGCCAAGGAGGAUC	(.(((((.(...(((((((((&))))))))).).))))).)
W02D3.5.1	WBGene00002258	lbp-6	332	348	PAO_13118	4	19	-13.31	AUCACCCGUUGGCUCGA&UGGAGCCAAGGAGGAU	(((..((.(((((((.(&).)))))))))..)))
F40F4.4a.1	WBGene00002255	lbp-3	372	392	PAO_13118	2	22	-14.26	UCGAUUCUUCAUACAUUUACU&GGUGGAGCCAAGGAGGAUCGA	((((((((((.....((((((&)))))).....))))))))))
C25A1.7.1	WBGene00002153	iars-2	2477	2496	PAO_13118	1	21	-16.37	CAAUCCUUCCGCAUUUAUCA&UGGUGGAGCCAAGGAGGAUCG	(.(((((((.((.(((((((&)))))))))...))))))).)
K02E2.4.1	WBGene00002118	ins-35	42	67	PAO_13118	1	18	-14.69	UCCUCGCAAUAAUCUUGGCGUCGCCA&UGGUGGAGCCAAGGAGGA	((((........(((((((.((((((&)))))).)))))))))))
F57B9.6a.1	WBGene00002083	inf-1	1344	1361	PAO_13118	2	22	-18.58	UCUGUUUUCUCCUCCACC&GGUGGAGCCAAGGAGGAUCGA	((.(((((((.(((((((&)))))))....))))))).))
F37B4.2.1	WBGene00002055	ifc-1	1185	1206	PAO_13118	1	21	-20.42	CGAUCCUCCACCCACGUCGCCA&UGGUGGAGCCAAGGAGGAUCG	(((((((((.....(.((((((&)))))).)....)))))))))
C12C8.1.1	WBGene00002026	hsp-70	1130	1146	PAO_13118	1	17	-15.21	CCUCAACUGCUCCAUUA&UGGUGGAGCCAAGGAGG	((((....(((((((((&)))))))))....))))
Y46H3A.2.1	WBGene00002018	hsp-16.41	134	155	PAO_13118	2	22	-13.77	UUGAUCAUUUCUUGGACGAACU&GGUGGAGCCAAGGAGGAUCGA	((((((.((((((((.(..(((&)))...)))))))))))))))
F38E11.1.1	WBGene00002012	hsp-12.3	383	405	PAO_13118	3	23	-12.38	UUGGAGAAUUCCUUGAGAUCCAC&GUGGAGCCAAGGAGGAUCGAA	((.((...(((((((.(.(((((&))))).))))))))..)).))
E04A4.4a.1	WBGene00001983	hoe-1	1219	1237	PAO_13118	2	23	-20.8	UUCGAUCAAUUGCUCCAUC&GGUGGAGCCAAGGAGGAUCGAA	(((((((..((((((((((&))))))).)))....)))))))
Y50E8A.16.1	WBGene00001817	haf-7	1202	1222	PAO_13118	2	23	-22.97	UUCAUGCUCUUUGGCUCGGCU&GGUGGAGCCAAGGAGGAUCGAA	(((((.(((((((((((.(((&))).))))))))))).)).)))
F43E2.4.1	WBGene00001812	haf-2	953	976	PAO_13118	1	21	-18.34	CGAUCUCUUCUACAGUUUCUACCA&UGGUGGAGCCAAGGAGGAUCG	(((((.(((((...(.((((((((&)))))))).).))))))))))
Y53F4B.33.1	WBGene00001787	gst-39	413	429	PAO_13118	5	20	-10.41	GAUUCUCAAUGGGCUUC&GGAGCCAAGGAGGAUC	(((((((....((((((&))))))...)))))))
C02A12.1.1	WBGene00001781	gst-33	698	710	PAO_13118	7	19	-13.26	AUUUUUUUUGGCU&AGCCAAGGAGGAU	(((((((((((((&)))))))))))))
F11G11.2.1	WBGene00001755	gst-7	553	568	PAO_13118	4	20	-11.63	GAUCUUCUGGCUGCCA&UGGAGCCAAGGAGGAUC	((((((((((((.(((&)))))))..))))))))
C05E4.9a.1	WBGene00001564	icl-1	249	264	PAO_13118	1	16	-22.19	CUCCGAGGCUCCAUCG&UGGUGGAGCCAAGGAG	((((..((((((((((&))))))))))..))))
W08D2.4b.1	WBGene00001395	fat-3	29	49	PAO_13118	2	22	-19.94	UCGAUGGCAAAUGGCUCUACC&GGUGGAGCCAAGGAGGAUCGA	(((((......((((((((((&))))))))))......)))))
K10D2.6.1	WBGene00001262	emb-8	1011	1035	PAO_13118	2	23	-14.02	UUCGAUCCUGAUCACGCAUUCCGUC&GGUGGAGCCAAGGAGGAUCGAA	(((((((((......((..((((((&)))))))).....)))))))))
Y105E8A.4.1	WBGene00001156	ech-7	593	600	PAO_13118	12	19	-9.49	AUUCUCCU&AGGAGGAU	((((((((&))))))))
F56B3.5.1	WBGene00001154	ech-5	28	43	PAO_13118	2	17	-15.49	CCUCCGUGCCUUCGCC&GGUGGAGCCAAGGAGG	(((((.((.(((((((&))))))).)).)))))
F49E8.5.1	WBGene00000996	dif-1	227	246	PAO_13118	2	16	-12.67	CUUGUUGGUGUUUCUCCACU&GGUGGAGCCAAGGAG	(((.((((.....(((((((&))))))))))).)))
C45B11.3.1	WBGene00000981	dhs-18	823	839	PAO_13118	4	20	-13.86	GAUCCUCACUUAUUCCA&UGGAGCCAAGGAGGAUC	(((((((.(((.(((((&)))))..))))))))))
R05D8.8.1	WBGene00000977	dhs-14	86	95	PAO_13118	13	22	-14.76	UCGAUUCUCU&GGAGGAUCGA	((((((((((&))))))))))
C17G10.8.1	WBGene00000970	dhs-6	1156	1172	PAO_13118	2	20	-11.69	GAACAUUUCGCUCCACU&GGUGGAGCCAAGGAGGAUC	((.(.((((((((((((&))))))))...))))).))
F40E10.3.1	WBGene00000822	csq-1	1268	1279	PAO_13118	12	23	-11.93	UUUGAUCUACCU&AGGAGGAUCGAA	((((((((.(((&))).))))))))
W07B8.5.1	WBGene00000785	cpr-5	101	121	PAO_13118	2	19	-13.75	AUUCUUCUCGUGGCUGCUGCC&GGUGGAGCCAAGGAGGAU	((((((((..(((((.(((((&))))))))))))))))))
F44C4.3.1	WBGene00000784	cpr-4	453	474	PAO_13118	2	20	-14.5	GUUCUUUCUUGCUGCUCCAACU&GGUGGAGCCAAGGAGGAUC	(.(((((((((..(((((.(((&))))))))))))))))).)
C52E4.1.1	WBGene00000781	cpr-1	330	339	PAO_13118	14	23	-13.88	UUCGAUUCUC&GAGGAUCGAA	((((((((((&))))))))))
F49D11.8.1	WBGene00000780	cpn-4	286	305	PAO_13118	1	22	-15.63	UCAAUUUUCCACUGCCGCCA&UGGUGGAGCCAAGGAGGAUCGA	((.(((((((.((.((((((&))))))))....))))))).))
F14H8.6b.1	WBGene00000562	cng-1	488	508	PAO_13118	1	23	-22.55	UUCGCAUCUUCUUCUCCAUCA&UGGUGGAGCCAAGGAGGAUCGAA	((((.((((((((((((((((&))))))))...))))))))))))
K01C8.10.1	WBGene00000379	cct-4	1660	1674	PAO_13118	1	17	-19.73	CUUCCUGCUCUACCG&UGGUGGAGCCAAGGAGG	(((((((((((((((&)))))))))..))))))
F08F3.7.1	WBGene00000373	cyp-14A5	1574	1597	PAO_13118	1	23	-19.38	UUUGAUUUUCAGUGCGCUCAUCCA&UGGUGGAGCCAAGGAGGAUCGAA	((((((((((..((.((((..(((&)))..))))))..))))))))))
C34E10.6.1	WBGene00000229	atp-2	1231	1250	PAO_13118	2	22	-28.77	UCGAUCCACUUGACUCCACC&GGUGGAGCCAAGGAGGAUCGA	(((((((.((((.(((((((&))))))).))))..)))))))
F26D10.9a.1	WBGene00000224	atgp-1	578	596	PAO_13118	1	20	-17.12	GAUCUCCCUGUGUCUACCA&UGGUGGAGCCAAGGAGGAUC	(((((((.((..(((((((&)))))))..)).))).))))
ZK455.4.1	WBGene00000212	asm-2	1015	1032	PAO_13118	3	20	-15.56	GGUCCUCAGUGGUUGUAU&GUGGAGCCAAGGAGGAUC	(((((((..(((((.(((&))).)))))..)))))))
K07A12.3.1	WBGene00000209	asg-1	127	136	PAO_13118	2	11	-14.15	UGGCUCCACC&GGUGGAGCCA	((((((((((&))))))))))
F54D8.3a.1	WBGene00000107	alh-1	45	61	PAO_13118	1	17	-19.08	CCUCCGGUGUUCCACCA&UGGUGGAGCCAAGGAGG	(((((...(((((((((&)))))))))...)))))
F12E12.11.1	WBGene00044811	F12E12.11	619	642	PAO_14838	1	21	-12.05	GGGAGGAGUCUACACAGGAUUCGG&UCGAAUCCAGCCGCCCCUGCC	((.(((.((...(...((((((((&)))))))).)..)).))).))
B0205.13.1	WBGene00044644	B0205.13	116	137	PAO_14838	1	22	-15.5	UGGUGUUGGCUAUUGGAUUGGA&UCGAAUCCAGCCGCCCCUGCCA	(((((..(((..(((((((.((&)).)))))))..)))..)))))
C01B10.11.1	WBGene00044294	C01B10.11	441	449	PAO_14838	3	11	-17.63	GCUGGAUUC&GAAUCCAGC	(((((((((&)))))))))
K02E11.10.1	WBGene00044109	K02E11.10	283	305	PAO_14838	1	21	-15.92	GGUGGAGGACUCGGAGGAUUUGG&UCGAAUCCAGCCGCCCCUGCC	(((((.((...(((.((((((((&))))))))..))).)))))))
ZK697.14.1	WBGene00022809	ZK697.14	591	612	PAO_14838	3	21	-11.76	GGCAAUGUGUCCUGGUUGGGUC&GAAUCCAGCCGCCCCUGCC	((((..(.((...(((((((((&)).))))))))))..))))
ZK652.2.1	WBGene00022783	tomm-7	191	213	PAO_14838	2	20	-16.37	GCAGCCGGGUGGCCGUUGGAUCG&CGAAUCCAGCCGCCCCUGC	((((..(((((((...(((((((&))).)))))))))))))))
Y82E9BR.18.1	WBGene00022350	Y82E9BR.18	2209	2223	PAO_14838	10	21	-14.82	GAGCAGCUGGGCGGU&GCCGCCCCUGCC	(.((((..(((((((&))))))))))))
Y73C8C.2.1	WBGene00022261	clec-210	450	487	PAO_14838	2	23	-12.49	GUGGCAGACCCGGGAUGAUCAGGAUGAGCUGGCAUUCG&CGAAUCCAGCCGCCCCUGCCAU	(((((((....(((..........((.(((((.(((((&))))))))))))))))))))))
Y73C8B.1.1	WBGene00022258	Y73C8B.1	640	657	PAO_14838	1	20	-15.31	GCCGUGGCGGUUAUUCGA&UCGAAUCCAGCCGCCCCUGC	((.(.(((((((((((((&))))))..))))))).).))
Y58A7A.5.1	WBGene00021979	Y58A7A.5	168	180	PAO_14838	6	20	-15.05	GCAGAUGGCUGGG&UCCAGCCGCCCCUGC	((((.((((((((&))))))))...))))
Y54E10A.17b.1	WBGene00021835	Y54E10A.17	99	117	PAO_14838	6	23	-18.67	GUGGCAGGUUGUGGAUGGA&UCCAGCCGCCCCUGCCAU	((((((((..((((.((((&)))).)))).))))))))
Y53G8B.2.1	WBGene00021818	Y53G8B.2	643	663	PAO_14838	2	22	-13.42	UGGCAUCAAGAAAGGGAUUUG&CGAAUCCAGCCGCCCCUGCCA	(((((.........(((((((&))))))).........)))))
Y50D4B.2a.1	WBGene00021741	Y50D4B.2	478	499	PAO_14838	3	23	-18.87	AUGGCAGCUAGUGGUUGUGUUC&GAAUCCAGCCGCCCCUGCCAU	(((((((...(((((((.((((&)))).)))))))..)))))))
Y49C4A.8a.1	WBGene00021709	ugt-29	728	754	PAO_14838	1	23	-15.98	GUGAAGAGGGAGUUACGCUGGAUGAGG&UCGAAUCCAGCCGCCCCUGCCAU	(((...((((.((...(((((((..((&))..))))))).))))))..)))
Y48G8AL.5a.1	WBGene00021686	nsun-2	500	521	PAO_14838	3	19	-15.21	CAGGAGGCGGUUUCAAUGAUUC&GAAUCCAGCCGCCCCUG	((((.(((((((.....(((((&))))).)))))))))))
Y46H3D.6b.1	WBGene00021610	nhr-237	63	70	PAO_14838	8	15	-14.12	GGUGGCUG&CAGCCGCC	((((((((&))))))))
W03G1.5.1	WBGene00021011	W03G1.5	186	198	PAO_14838	1	11	-11.78	GCUAAAGAUUCGA&UCGAAUCCAGC	(((...(((((((&))))))).)))
W02F12.2.1	WBGene00020947	W02F12.2	188	200	PAO_14838	3	15	-11.33	GGUGGUUUGAUUU&GAAUCCAGCCGCC	(((((((.(((((&))))).)))))))
R151.9.1	WBGene00020112	pfd-5	2	8	PAO_14838	17	23	-10.45	AUGGCAG&CUGCCAU	(((((((&)))))))
R08F11.4.1	WBGene00019968	R08F11.4	539	561	PAO_14838	3	23	-19.94	AUGUCGGGUGUGGGGGUGGAUUC&GAAUCCAGCCGCCCCUGCCAU	(((.((((.(.(.((.(((((((&))))))).)).)))))).)))
R02E12.6.1	WBGene00019830	hrg-1	356	374	PAO_14838	6	21	-21.98	GGCAGGUGUGAUGGCUGGA&UCCAGCCGCCCCUGCC	((((((.(.(.((((((((&))))))))))))))))
M04F3.4b.1	WBGene00019770	M04F3.4	606	626	PAO_14838	4	23	-10.56	GUGUGUUCAAUCGUCUGGGUU&AAUCCAGCCGCCCCUGCCAU	(((.((.....((.(((((((&))))))).)).....)))))
K11G9.1.1	WBGene00019652	cest-34	369	390	PAO_14838	1	23	-21.62	AUGUGCACGGUGGUGGAUUUGA&UCGAAUCCAGCCGCCCCUGCCAU	(((.(((.((((((((((((((&))))))))).)))))..))))))
K09F6.10.1	WBGene00019593	K09F6.10	1488	1521	PAO_14838	1	21	-14.49	GGCUGGAUUGCGACCGCGAAGAACAUGGAUUCGA&UCGAAUCCAGCCGCCCCUGCC	(((.((...(((...((........(((((((((&)))))))))))))).)).)))
K08D9.4a.1	WBGene00019525	K08D9.4	619	628	PAO_14838	3	12	-14.75	GGUUGGAUUC&GAAUCCAGCC	((((((((((&))))))))))
K06A5.6.1	WBGene00019433	acdh-3	1112	1133	PAO_14838	3	23	-16.17	AUGGCUUGGAGGAGUUGGAUUC&GAAUCCAGCCGCCCCUGCCAU	(((((..((..(.(((((((((&))))))))))..))..)))))
K02F2.2.1	WBGene00019322	ahcy-1	664	687	PAO_14838	1	21	-12.58	GGUAGCCGUUGUCGCUGGAUACGG&UCGAAUCCAGCCGCCCCUGCC	(((((..((....(((((((.(((&))).))))))).))..)))))
H06H21.6.1	WBGene00019163	ubxn-6	679	690	PAO_14838	3	14	-10.21	GCUGUUGGAUUU&GAAUCCAGCCGC	((.(((((((((&))))))))).))
F59B1.8.1	WBGene00019100	F59B1.8	33	50	PAO_14838	4	20	-13.72	GCAGCCAGGUACUGGAUU&AAUCCAGCCGCCCCUGC	((((...(((.(((((((&)))))))..))).))))
F58F9.7.1	WBGene00019060	acox-3	710	735	PAO_14838	5	22	-28	UGGCAGGGAGUAGAAAAUGGCUGGAU&AUCCAGCCGCCCCUGCCA	((((((((.((.......((((((((&))))))))))))))))))
F57B10.3a.1	WBGene00019001	ipgm-1	661	676	PAO_14838	3	19	-12.92	CAGUGGAGUUGGAUUC&GAAUCCAGCCGCCCCUG	(((.((.(((((((((&)))))))))..)).)))
F57B9.1.1	WBGene00018996	F57B9.1	595	612	PAO_14838	1	17	-11.27	GGGGUGGAUAUCAUUUGA&UCGAAUCCAGCCGCCCC	(((((((.....((((((&))))))....)))))))
F56C11.6a.1	WBGene00018958	cest-27	193	212	PAO_14838	4	23	-18.87	AUGGACGGAGCCGCUGGAUU&AAUCCAGCCGCCCCUGCCAU	((((..((.((.((((((((&)))))))).)).))..))))
F55F8.5.1	WBGene00018893	wdr-12	203	223	PAO_14838	1	23	-18.91	AUGGAAAGAGCGGCGAUUCGA&UCGAAUCCAGCCGCCCCUGCCAU	((((...(.((((((((((((&)))))))..))))).)...))))
F54D11.1.1	WBGene00018811	pmt-2	861	883	PAO_14838	1	21	-13.15	GGACAGACAAUGCUGGAUAUUGG&UCGAAUCCAGCCGCCCCUGCC	((.(((.....(((((((.((((&))))))))))).....)))))
F54A5.2a.1	WBGene00018787	cutl-20	116	134	PAO_14838	3	22	-12.74	UGGUCGGUGGUUGUGGUGC&GAAUCCAGCCGCCCCUGCCA	((((.((((((((.(((.(&).)))))))))))...))))
F53C3.6a.1	WBGene00018750	F53C3.6	174	193	PAO_14838	3	23	-20.37	GUGGCGGCGGCGGCGGCUUC&GAAUCCAGCCGCCCCUGCCAU	(((((((.((((((((.(((&))).)).)))))).)))))))
F52E4.5.1	WBGene00018702	F52E4.5	306	320	PAO_14838	3	17	-10.56	GGAGCAAUUGGAUUC&GAAUCCAGCCGCCCC	((.((..((((((((&))))))))..)).))
F44E7.8a.1	WBGene00018430	nhr-142	951	973	PAO_14838	1	22	-11.99	UGGCAAGUGUCACAGAGAUUCGA&UCGAAUCCAGCCGCCCCUGCCA	(((((.(.((..(.(.(((((((&)))))))).)..)).).)))))
F44C8.1.1	WBGene00018413	cyp-33C4	1016	1030	PAO_14838	1	15	-13.68	GGUGGUUGGUAGUGA&UCGAAUCCAGCCGCC	(((((((((...(((&)))...)))))))))
F43E2.3a.1	WBGene00018392	insc-1	1236	1255	PAO_14838	1	20	-15.9	GCAAGGAGGCUUGGAUUUGG&UCGAAUCCAGCCGCCCCUGC	(((.((.((((.((((((((&))))))))))))..)).)))
F41C3.5.1	WBGene00018271	ctsa-1.1	62	68	PAO_14838	2	8	-8.17	GGAUUUG&CGAAUCC	(((((((&)))))))
F41B5.3a.1	WBGene00018261	cyp-33C5	1012	1026	PAO_14838	1	15	-16.96	GGUGGUUGGAAGUGA&UCGAAUCCAGCCGCC	((((((((((..(((&)))..))))))))))
F28C10.3.1	WBGene00017898	F28C10.3	715	732	PAO_14838	3	22	-10.31	UGGUGGGCUGUUGGAAUC&GAAUCCAGCCGCCCCUGCCA	((((((((.((((((.((&)).)))))).)..)))))))
F28A12.4.1	WBGene00017881	asp-13	1135	1155	PAO_14838	3	21	-15.29	GGACAGAAACGUGUUGGAUUC&GAAUCCAGCCGCCCCUGCC	((.(((...((.(((((((((&)))))))))))...)))))
F28A10.6.1	WBGene00017874	acdh-9	1087	1101	PAO_14838	3	15	-14.67	GGUGGCUACGGAUUC&GAAUCCAGCCGCC	(((((((..((((((&)))))))))))))
F22A3.6a.1	WBGene00017691	ilys-5	248	265	PAO_14838	1	19	-12.15	CAAAGAAGGCUGGAGAGA&UCGAAUCCAGCCGCCCCUG	((..(..(((((((..((&))...)))))))..)..))
F21F8.11.1	WBGene00017681	slc-17.5	771	791	PAO_14838	3	22	-11.41	UGGAAUCUCGUGGUUGGUUUU&GAAUCCAGCCGCCCCUGCCA	(((......((((((((.(((&))).)))))))).....)))
F18E3.7a.1	WBGene00017565	ddo-2	359	377	PAO_14838	6	23	-17.04	AUGAUAGAGAACGGCUGGA&UCCAGCCGCCCCUGCCAU	(((.(((.(..((((((((&))))))))..)))).)))
F16B4.9.1	WBGene00017510	nhr-178	692	698	PAO_14838	7	13	-8.62	UGGCUGG&CCAGCCG	(((((((&)))))))
F15E6.6.1	WBGene00017487	F15E6.6	511	535	PAO_14838	1	20	-18.78	GUGGGGGUAAAAAAGCUGGAGCAGG&UCGAAUCCAGCCGCCCCUGC	((((((((......((((((...((&))...)))))).))))))))
F14F9.3.1	WBGene00017466	F14F9.3	383	406	PAO_14838	1	22	-15.31	UGGCAGGAGCACCAGAAAAUUUGA&UCGAAUCCAGCCGCCCCUGCCA	(((((((.((..(.(...((((((&)))))).).)..)).)))))))
F13C5.1.1	WBGene00017422	F13C5.1	25	32	PAO_14838	3	10	-8.7	CUGGAUUU&GAAUCCAG	((((((((&))))))))
F10E7.8a.1	WBGene00017349	farl-11	1142	1155	PAO_14838	6	20	-10.89	GCUUGGAGGUUGGG&UCCAGCCGCCCCUGC	((..((.(((((((&)))))))..))..))
F09F7.4b.1	WBGene00017301	hach-1	81	87	PAO_14838	9	15	-8.75	GGUGGUU&AGCCGCC	(((((((&)))))))
F09E5.3.1	WBGene00017283	F09E5.3	754	772	PAO_14838	3	22	-15.88	UGGAAAGAAGGUUGGAUUC&GAAUCCAGCCGCCCCUGCCA	(((......((((((((((&)))))))))).......)))
F07F6.8.1	WBGene00017220	F07F6.8	225	237	PAO_14838	1	11	-11.94	GCUGGAUAAUUGG&UCGAAUCCAGC	(((((((..((((&)))))))))))
DC2.5a.1	WBGene00017082	DC2.5	1168	1175	PAO_14838	3	10	-11.46	CUGGAUUU&GAAUCCAG	((((((((&))))))))
D2063.1.1	WBGene00017060	D2063.1	571	588	PAO_14838	3	22	-18.77	UGGUGGUGGGCUGGGAUC&GAAUCCAGCCGCCCCUGCCA	((((((.((((((((.((&)).))))))).).)).))))
CD4.7b.1	WBGene00016992	zhit-1	191	207	PAO_14838	5	21	-9.95	GGAAUCGACAGCUGGAU&AUCCAGCCGCCCCUGCC	((....(.(.(((((((&))))))).).)....))
C55B7.4a.1	WBGene00016943	acdh-1	1151	1172	PAO_14838	3	23	-22.25	AUGGCUCGGUGGUGUUGGAUUC&GAAUCCAGCCGCCCCUGCCAU	(((((..((.((((((((((((&)))))))).)))))).)))))
C54G7.2.1	WBGene00016934	mboa-3	1145	1155	PAO_14838	3	15	-12.04	GGUGGCUGCUC&GAAUCCAGCCGCC	((((((((.((&))...))))))))
C49G7.5.1	WBGene00016783	irg-2	676	700	PAO_14838	1	23	-9.35	AUGAAAGAAGCAGUUUUUGAUUUGA&UCGAAUCCAGCCGCCCCUGCCAU	(((..((..((.(((...(((((((&))))))).))).))..))..)))
C49A9.8.1	WBGene00016762	ugt-24	819	828	PAO_14838	3	13	-9.43	CGGUGGAUUC&GAAUCCAGCCG	((((((((((&))))))).)))
C44B7.10.1	WBGene00016630	acer-1	631	645	PAO_14838	1	15	-16.47	GGCUGACGGAUUCGA&UCGAAUCCAGCCGCC	(((.(..((((((((&))))))))..).)))
C37H5.13a.1	WBGene00016511	C37H5.13	973	993	PAO_14838	3	20	-14.01	GCACUUGCGAUGAUUGGAUUC&GAAUCCAGCCGCCCCUGC	(((...(((..(.((((((((&))))))))))))...)))
C35B1.2a.1	WBGene00016432	C35B1.2	1627	1645	PAO_14838	2	18	-17.72	AGAAGCUUGGCUGGAAUCG&CGAAUCCAGCCGCCCCU	((..((..(((((((.(((&))).)))))))))..))
C29F5.1.1	WBGene00016210	C29F5.1	917	929	PAO_14838	3	18	-14.62	AGGAGCUGGAUUC&GAAUCCAGCCGCCCCU	(((.(((((((((&)))))))))....)))
C23H5.8b.1	WBGene00016027	C23H5.8	601	607	PAO_14838	6	12	-10.85	GGCUGGG&UCCAGCC	(((((((&)))))))
C17C3.1a.1	WBGene00015887	C17C3.1	745	760	PAO_14838	1	20	-10.47	GCACGAGGCGAUUUGA&UCGAAUCCAGCCGCCCCUGC	(((.(.((((((((((&))))))).....)))).)))
C15B12.8.1	WBGene00015788	C15B12.8	275	281	PAO_14838	10	16	-16.21	GGGCGGC&GCCGCCC	(((((((&)))))))
C10H11.4.1	WBGene00015693	ugt-28	509	523	PAO_14838	2	14	-12.45	GUGGACUUGGAUUCG&CGAAUCCAGCCGC	((((.((.(((((((&)))))))))))))
C07D10.2a.1	WBGene00015567	bath-44	460	472	PAO_14838	1	11	-8.53	GCUGAUGAUUUGA&UCGAAUCCAGC	((((..(((((((&)))))))))))
C06E7.1a.1	WBGene00015538	sams-3	287	294	PAO_14838	1	8	-11.26	GGAUUCGA&UCGAAUCC	((((((((&))))))))
C06A8.1b.1	WBGene00015512	mthf-1	339	349	PAO_14838	1	14	-10.57	GCGGUUGUCGA&UCGAAUCCAGCCGC	(((((((((((&))))...)))))))
C01B12.3.1	WBGene00015286	best-3	1290	1310	PAO_14838	1	23	-13.02	GUGGUAGGAAACUGAGUGAGA&UCGAAUCCAGCCGCCCCUGCCAU	((((((((...(((.((..((&))..)).))).....))))))))
B0361.8.1	WBGene00015162	algn-11	115	125	PAO_14838	1	10	-11.09	CUGGAUUCCGA&UCGAAUCCAG	((((((((.((&))))))))))
K08E5.1b.1	WBGene00014801	K08E5.1	440	464	PAO_14838	1	21	-17.57	GGAGGAGAAGAUGGCUGAGGUUCGA&UCGAAUCCAGCCGCCCCUGCC	(((((.(....((((((.(((((((&)))))))))))))).))).))
ZK1320.4.1	WBGene00014254	cyp-13A10	460	466	PAO_14838	17	23	-8.32	AUGGUAG&CUGCCAU	(((((((&)))))))
ZK896.5.1	WBGene00014136	ZK896.5	730	742	PAO_14838	3	14	-9.95	GCGGUUGUCCUUC&GAAUCCAGCCGC	(((((((...(((&)))..)))))))
ZK822.5a.1	WBGene00014092	ZK822.5	318	333	PAO_14838	1	17	-19.08	GGGGUGGCGUCAUCGA&UCGAAUCCAGCCGCCCC	((((((((....((((&)))).....))))))))
ZK632.3.1	WBGene00014012	riok-3	326	347	PAO_14838	1	20	-12.11	GCUCGUGCUGUUGGAUCUUCGA&UCGAAUCCAGCCGCCCCUGC	((..(.((.(((((((..((((&))))))))))).)).)..))
ZC376.7a.2	WBGene00013878	atfs-1	1	20	PAO_14838	1	21	-18.15	GUGCGAUGUGGUUGGUUCGA&UCGAAUCCAGCCGCCCCUGCC	(.(((..(((((((((((((&))))).))))))))...))))
Y73F4A.2.1	WBGene00013515	Y73F4A.2	203	213	PAO_14838	1	11	-10.94	GUUGGGUUUGG&UCGAAUCCAGC	(((((((((((&)))))))))))
Y60A3A.7.1	WBGene00013358	abhd-3.1	275	296	PAO_14838	1	23	-22.13	AUGGCGGUGCUGCUGGAAUCGA&UCGAAUCCAGCCGCCCCUGCCAU	(((((((.((.((((((.((((&)))).)))))).))..)))))))
Y57G11C.34.1	WBGene00013324	mrps-7	132	141	PAO_14838	1	10	-9.98	UUGGAUUCGG&UCGAAUCCAG	((((((((((&))))))))))
Y57A10C.6.1	WBGene00013284	daf-22	1008	1024	PAO_14838	8	23	-14.49	AUGGCGGGAAAUGGGUG&CAGCCGCCCCUGCCAU	((((((((...(((.((&)).)))..))))))))
Y51A2D.9b.1	WBGene00013077	ttr-24	7	14	PAO_14838	3	10	-9.28	CUGGAUUU&GAAUCCAG	((((((((&))))))))
Y46G5A.18b.1	WBGene00012908	Y46G5A.18	1434	1449	PAO_14838	1	16	-12.16	GGACGGCGAGAUUUGG&UCGAAUCCAGCCGCCC	((.((((..(((((((&)))))))..)))).))
Y38F1A.6.1	WBGene00012608	hphd-1	1253	1269	PAO_14838	1	20	-15.54	GCAGUGGCUGAUUUCGA&UCGAAUCCAGCCGCCCCUGC	((((((((((..(((((&)))))..)))))))...)))
W09H1.5.1	WBGene00012375	mecr-1	306	332	PAO_14838	1	21	-18.09	GGCGGUUGGUGGAAAUGAAGGAUUUGG&UCGAAUCCAGCCGCCCCUGCC	(((((..(((((.......((((((((&))))))))..))))).)))))
R107.5b.1	WBGene00011300	R107.5	381	402	PAO_14838	1	21	-15.44	GGCAGUAGCCAAAAAGAUUCGA&UCGAAUCCAGCCGCCCCUGCC	(((((..((......(((((((&))))))).....))..)))))
R11A5.4a.1	WBGene00011232	pck-2	1936	1950	PAO_14838	1	14	-11.78	GUGGCCAGGAUUCGG&UCGAAUCCAGCCGC	(((((..((((((((&)))))))).)))))
R07E5.13.1	WBGene00011119	mpc-1	105	139	PAO_14838	1	19	-9.13	CUGGGGACUUCCGUUGGCUGCUCUUGGAGAUUUGA&UCGAAUCCAGCCGCCCCUG	(.((((........((((((........(((((((&))))))))))))))))).)
R07E3.1a.1	WBGene00011102	R07E3.1	1022	1032	PAO_14838	3	15	-12.21	GGCGGUUAUUC&GAAUCCAGCCGCC	(((((((((((&))))..)))))))
R04B5.6.1	WBGene00011004	R04B5.6	743	764	PAO_14838	1	19	-12.81	CAGGGGUCCAGCCGUGUGUCGA&UCGAAUCCAGCCGCCCCUG	(((((((...((.(.(..((((&))))..)).)).)))))))
R03D7.1.1	WBGene00010988	metr-1	1541	1557	PAO_14838	3	19	-13.04	CGGAAGAGGUUGGAUUC&GAAUCCAGCCGCCCCUG	(((..(.((((((((((&)))))))))).)..)))
M88.1.1	WBGene00010904	ugt-62	821	844	PAO_14838	1	22	-14.03	UGGAGGAUUAGGAGUUGGAUUUGA&UCGAAUCCAGCCGCCCCUGCCA	((((((....((.(((((((((((&)))))))))))..))))).)))
M05D6.6.3	WBGene00010879	taap-1	189	196	PAO_14838	9	16	-12.25	GGGCGGUU&AGCCGCCC	((((((((&))))))))
K12G11.3.1	WBGene00010790	sodh-1	420	428	PAO_14838	1	9	-12.2	UGGGUUCGA&UCGAAUCCA	(((((((((&)))))))))
K07C5.4.1	WBGene00010627	nol-56	1457	1468	PAO_14838	1	12	-15.59	GGCUGGAGACGA&UCGAAUCCAGCC	(((((((..(((&)))..)))))))
K02A11.3.1	WBGene00010488	endu-1	456	469	PAO_14838	1	15	-10.1	GGUUCUGGAUUGGA&UCGAAUCCAGCCGCC	(((.(((((((.((&)).)))))))..)))
K01D12.10.1	WBGene00010469	K01D12.10	539	560	PAO_14838	1	23	-20.44	GUGGUAGUGGGACUGGAAACGG&UCGAAUCCAGCCGCCCCUGCCAU	(((((((.(((.(((((..(((&)))..)))))...))))))))))
F59A2.3.1	WBGene00010303	cri-3	324	331	PAO_14838	1	8	-9.36	GGAUUCGA&UCGAAUCC	((((((((&))))))))
F54D5.12.1	WBGene00010055	F54D5.12	528	546	PAO_14838	1	18	-16.98	AGGGAUUCGGUUGAUUCGA&UCGAAUCCAGCCGCCCCU	((((...((((((((((((&))))))).))))).))))
F54B8.4a.1	WBGene00010019	F54B8.4	130	140	PAO_14838	3	14	-9.52	GCUAUGGAUUU&GAAUCCAGCCGC	((..(((((((&)))))))...))
F53F4.10.1	WBGene00009992	F53F4.10	82	100	PAO_14838	1	21	-16.36	GGCGGAGCUACUGGAUUGA&UCGAAUCCAGCCGCCCCUGCC	(((((.((..(((((((((&)).)))))))..)).)).)))
F53A2.7.1	WBGene00009952	acaa-2	645	663	PAO_14838	1	18	-20.06	AGGGGCGCAAGGGAGAAGA&UCGAAUCCAGCCGCCCCU	(((((((....(((...((&))...)))...)))))))
F49E12.9a.1	WBGene00009902	drd-1	961	985	PAO_14838	3	21	-8.78	GGCACAGGACUUCUUGAUUGGAUUC&GAAUCCAGCCGCCCCUGCC	((((..((......((.((((((((&)))))))).))))..))))
F44G3.2.1	WBGene00009706	argk-1	885	899	PAO_14838	3	16	-16	GGGUGGCUGACGUUC&GAAUCCAGCCGCCC	(((((((((..((((&)))).)))))))))
F32D8.12a.1	WBGene00009334	F32D8.12	410	416	PAO_14838	4	10	-8.34	CUGGAUU&AAUCCAG	(((((((&)))))))
F28F8.2.1	WBGene00009221	acs-2	1517	1527	PAO_14838	6	16	-13.68	GGGUGGUGAGA&UCCAGCCGCCC	(((((((..((&))..)))))))
F27D4.1.1	WBGene00009187	F27D4.1	868	875	PAO_14838	6	13	-13.27	UGGCUGGA&UCCAGCCG	((((((((&))))))))
F14F7.3.1	WBGene00008810	cyp-13A12	1055	1065	PAO_14838	1	11	-19.33	GCUGGAUUCGA&UCGAAUCCAGC	(((((((((((&)))))))))))
F11C1.5a.1	WBGene00008694	vwa-8	4292	4311	PAO_14838	1	22	-23.08	UGGAGGGGCGGAUGAUGAGA&UCGAAUCCAGCCGCCCCUGCCA	(((((((((((..(((..((&))..)))...)))))))).)))
F09F3.9.1	WBGene00008629	cpt-5	1300	1314	PAO_14838	6	21	-17.92	GGUGGGGCUACUGGA&UCCAGCCGCCCCUGCC	((((((((..(((((&)))))..).)))))))
F09B12.3.1	WBGene00008607	F09B12.3	1361	1386	PAO_14838	2	23	-12.91	AUGGCAAUGUUCACGACUUGGAUUCG&CGAAUCCAGCCGCCCCUGCCAU	((((((.......((.((.(((((((&))))))))).))....))))))
F08H9.6.1	WBGene00008594	clec-57	736	751	PAO_14838	1	22	-14.02	UGGCUCGGGGAUUUGA&UCGAAUCCAGCCGCCCCUGCCA	((((..((((((((((&)))))))......)))..))))
F08A8.3.1	WBGene00008566	acox-1.3	397	418	PAO_14838	1	20	-19.54	GCAGGAGAAGUGGUUGGGGAGA&UCGAAUCCAGCCGCCCCUGC	(((((.(..(((((((((..((&))...)))))))))))))))
F02A9.4.1	WBGene00008514	mrpl-44	1063	1076	PAO_14838	1	14	-9.09	GUGGUUGAUGCAGA&UCGAAUCCAGCCGC	(((((((((...((&))..)).)))))))
E03H4.8.1	WBGene00008476	E03H4.8	1092	1100	PAO_14838	11	19	-16.07	CAGGGGUGG&CCGCCCCUG	(((((((((&)))))))))
DH11.2.1	WBGene00008436	DH11.2	623	631	PAO_14838	3	11	-15.86	GCUGGAUUC&GAAUCCAGC	(((((((((&)))))))))
C55A6.5.1	WBGene00008334	sdz-8	232	252	PAO_14838	1	22	-11.66	UGGAGAAAUUGUUGGAUCUGA&UCGAAUCCAGCCGCCCCUGCCA	(((((.....(((((((.(((&))).))))))).....)).)))
C54D10.1.1	WBGene00008296	cdr-2	42	59	PAO_14838	3	20	-11	GUUGGAGCCGUUGGGUUU&GAAUCCAGCCGCCCCUGC	((.((.((.(((((((((&))))))))).)).)).))
C52G5.2.1	WBGene00008260	C52G5.2	408	424	PAO_14838	3	19	-15.48	CAGGAAACAAUGGAUUC&GAAUCCAGCCGCCCCUG	((((......(((((((&)))))))......))))
C37A5.1.1	WBGene00007988	best-8	73	98	PAO_14838	1	23	-21.32	AUGGCGGGGCUCCGUCUGGAAGUCGA&UCGAAUCCAGCCGCCCCUGCCAU	(((((((((...((.(((((..((((&)))).))))).)).)))))))))
C36A4.9a.1	WBGene00007969	acs-19	856	873	PAO_14838	3	21	-15.39	GGUAGAAUGGAUGGAUUC&GAAUCCAGCCGCCCCUGCC	(((((..(((.(((((((&))))))).)))...)))))
C34C12.8.1	WBGene00007927	C34C12.8	850	868	PAO_14838	1	14	-11.16	GCCGUUUUAUAGGAUUCGA&UCGAAUCCAGCCGC	((.(((.....((((((((&))))))))))).))
C33A12.3b.1	WBGene00007882	C33A12.3	57	74	PAO_14838	3	21	-18.69	GGCAGGGGAAAAUGAUUU&GAAUCCAGCCGCCCCUGCC	((((((((.....(((((&)))))......))))))))
C31E10.7.1	WBGene00007848	cytb-5.1	142	154	PAO_14838	6	22	-14.21	UGAGCAGGCUGGA&UCCAGCCGCCCCUGCCA	((.((((((((((&))))))).....)))))
C30H6.7a.1	WBGene00007824	dlat-2	204	210	PAO_14838	9	15	-11.6	GGUGGCU&AGCCGCC	(((((((&)))))))
C29F7.2a.1	WBGene00007811	C29F7.2	585	602	PAO_14838	7	22	-9.81	UGUGUUGGAAAUGGCUGG&CCAGCCGCCCCUGCCA	((.((.((...(((((((&)))))))..)).))))
C27H6.4b.1	WBGene00007786	rmd-2	62	73	PAO_14838	8	19	-16.82	CAGGUGCGGCUG&CAGCCGCCCCUG	((((.(((((((&))))))).))))
C27A7.5a.1	WBGene00007756	C27A7.5	1803	1814	PAO_14838	3	14	-11.51	GCUGGUGGAUUC&GAAUCCAGCCGC	((.(.(((((((&))))))).).))
C15C8.3a.1	WBGene00007605	hrg-7	873	885	PAO_14838	3	15	-8.77	GUCGACUGGGUUC&GAAUCCAGCCGCC	(.((.((((((((&)))))))).)).)
C14C10.3a.1	WBGene00007586	ril-2	153	173	PAO_14838	1	20	-13.57	GCACACGGAUGGCCGAUUUGA&UCGAAUCCAGCCGCCCCUGC	(((...((.((((.(((((((&)))))))..)))).)).)))
C14B1.3.1	WBGene00007574	C14B1.3	544	569	PAO_14838	1	23	-11.64	AUGGCAGUGGAAUCCACAUGGAAAGA&UCGAAUCCAGCCGCCCCUGCCAU	(((((((.((........((((..((&))...))))....)).)))))))
C14A4.14.1	WBGene00007564	mrps-22	1202	1226	PAO_14838	2	23	-14.07	GUGGUGGAAAAGGACGAUGGAGAAG&CGAAUCCAGCCGCCCCUGCCAU	(((((((....((.((.((((...(&)...))))..)).)))))))))
C08F8.2b.1	WBGene00007444	C08F8.2	863	876	PAO_14838	1	14	-12.79	GUGGCUGGGCAUGG&UCGAAUCCAGCCGC	(((((((((..(((&)))..)))))))))
C05C10.3.1	WBGene00007330	C05C10.3	1263	1282	PAO_14838	6	21	-16.85	GGAAUGGGCGGUGCAAUGGA&UCCAGCCGCCCCUGCC	((...(((((((....((((&)))))))))))...))
B0399.2.1	WBGene00007177	oac-1	1543	1551	PAO_14838	5	13	-14.7	CGGCUGGAU&AUCCAGCCG	(((((((((&)))))))))
B0285.4.1	WBGene00007137	lcmt-1	563	583	PAO_14838	3	21	-15.88	GGCAGGCUAAUGAGUUGGAUC&GAAUCCAGCCGCCCCUGCC	((((((....((.((((((((&).)))))))))..))))))
B0272.3.1	WBGene00007129	B0272.3	737	746	PAO_14838	5	15	-11.91	GGUGCUGGAU&AUCCAGCCGCC	((((((((((&))))))).)))
C16A3.7.1	WBGene00007048	nfx-1	3165	3178	PAO_14838	10	21	-17.52	GGAAGAAGGGUGGC&GCCGCCCCUGCC	((.((..(((((((&))))))))).))
K07E3.8.1	WBGene00006890	vem-1	501	524	PAO_14838	1	23	-10.03	GUGGAGCCGAGUCUUUGGAUUCGA&UCGAAUCCAGCCGCCCCUGCCAU	((((((..(.((..((((((((((&))))))))))..)).))).))))
C01G6.6a.1	WBGene00006510	mtrr-1	1574	1581	PAO_14838	6	13	-11.67	CGGCUGGA&UCCAGCCG	((((((((&))))))))
E02H1.3.1	WBGene00006473	tag-124	1276	1304	PAO_14838	1	23	-14.11	AUGGCAGAAAAGAAGAAAAAUGGAGAAGA&UCGAAUCCAGCCGCCCCUGCCAU	(((((((....(........((((...((&))...))))..)....)))))))
C31C9.1a.1	WBGene00006404	tag-10	154	168	PAO_14838	6	23	-16.18	GUGGCAGGACCUGGA&UCCAGCCGCCCCUGCCAU	((((((((..(((((&))))).....))))))))
C47E12.1.1	WBGene00005663	sars-1	163	179	PAO_14838	8	21	-11.41	GGAGAGAUUUGUGGCUG&CAGCCGCCCCUGCC	((((.(....(((((((&)))))))).)).))
K11D12.3b.1	WBGene00005655	srr-4	200	216	PAO_14838	6	21	-17.42	GGCUUGUGCGGCUGCGA&UCCAGCCGCCCCUGCC	(((..(.(((((((.((&))))))))).)..)))
C27B7.1a.1	WBGene00005007	spr-2	362	372	PAO_14838	3	20	-10.44	GCAGUGGAUUC&GAAUCCAGCCGCCCCUGC	(((((((((((&))))))).......))))
C28C12.7a.1	WBGene00004995	spp-10	532	551	PAO_14838	1	19	-11.7	CAGAGGAUUCUGCGAUUUGG&UCGAAUCCAGCCGCCCCUG	(((.((...(((.(((((((&))))))))))...)).)))
D2023.2a.1	WBGene00004258	pyc-1	2230	2243	PAO_14838	1	12	-13.69	GGCUGGAGUUCUGA&UCGAAUCCAGCC	(((((((.(((.((&))))))))))))
F22E10.2.1	WBGene00004007	pgp-13	2868	2893	PAO_14838	2	20	-16.17	GUUGGGAUUCAUUAUGGCUGGAUUGG&CGAAUCCAGCCGCCCCUGC	((.(((........((((((((((.(&).)))))))))).))).))
C47A10.1.1	WBGene00004003	pgp-9	1005	1025	PAO_14838	6	23	-23.38	AUGGCACUUGGGCAGGCUGGA&UCCAGCCGCCCCUGCCAU	((((((...((((.(((((((&))))))))))).))))))
C05A9.1a.1	WBGene00003999	pgp-5	1609	1619	PAO_14838	6	16	-14.31	GGGUGGCCAGA&UCCAGCCGCCC	(((((((..((&))..)))))))
F42E11.1a.1	WBGene00003998	pgp-4	1661	1673	PAO_14838	10	20	-15	GCAGGGGCUGUGC&GCCGCCCCUGC	((((((((.(.((&)))))))))))
K08E7.9.1	WBGene00003995	pgp-1	3777	3787	PAO_14838	2	14	-12.84	GCGCUGGAUCG&CGAAUCCAGCCGC	(((((((((((&)).))))))).))
M117.2a.3	WBGene00003920	par-5	647	653	PAO_14838	2	8	-8.68	GGAUUCG&CGAAUCC	(((((((&)))))))
C52B9.7a.1	WBGene00003907	paf-2	863	871	PAO_14838	5	13	-13.99	UGGCUGGAU&AUCCAGCCG	(((((((((&)))))))))
K11C4.4.1	WBGene00003844	odc-1	972	990	PAO_14838	3	22	-14.91	UGAUAUGGGUGGUGGAUUU&GAAUCCAGCCGCCCCUGCCA	((.((.(((((((((((((&))))))).)))))).)).))
C15H11.3.1	WBGene00003834	nxf-1	1525	1544	PAO_14838	1	19	-14.37	CAGUUGCCUCGUUGGAUCGA&UCGAAUCCAGCCGCCCCUG	(((..((...((((((((((&))).))))))).))..)))
VC5.5.1	WBGene00003725	nhr-135	250	258	PAO_14838	7	20	-8.48	GCUGGCUGG&CCAGCCGCCCCUGC	(((((((((&))))))).....))
H12C20.3a.1	WBGene00003658	nhr-68	1002	1024	PAO_14838	6	23	-15.09	AUGGUACAGAAGGACGGGUUGGA&UCCAGCCGCCCCUGCCAU	(((((.....(((...(((((((&)))))))...))))))))
ZC155.1.1	WBGene00003588	nex-1	644	660	PAO_14838	1	20	-9.1	GCUGGUGGCUCUAUCGA&UCGAAUCCAGCCGCCCCUGC	((.(((((((...((((&))))....)))))))...))
F57C12.4.1	WBGene00003408	mrp-2	2000	2015	PAO_14838	1	17	-13.79	GGGAAAGUUGGAUCGG&UCGAAUCCAGCCGCCCC	(((...((((((((((&))).)))))))...)))
C05D11.11a.1	WBGene00003214	mel-32	1326	1332	PAO_14838	6	12	-14.96	GGCUGGA&UCCAGCC	(((((((&)))))))
C02A12.4.1	WBGene00003096	lys-7	425	443	PAO_14838	3	21	-9.94	GUCAGAGCAAUCUGGAUUC&GAAUCCAGCCGCCCCUGCC	(.(((.((...((((((((&))))))))..))..))).)
F58B3.1.1	WBGene00003093	lys-4	530	552	PAO_14838	1	22	-12.85	UGGCAAGAUAUUGUUGGAUUGGA&UCGAAUCCAGCCGCCCCUGCCA	(((((.(.....((((((((.((&)).))))))))....).)))))
W02D3.5.1	WBGene00002258	lbp-6	76	90	PAO_14838	1	15	-15.81	GGAGGUUGGAGUUGG&UCGAAUCCAGCCGCC	((.(((((((.((((&)))).))))))).))
F40F4.4a.1	WBGene00002255	lbp-3	442	456	PAO_14838	9	23	-18.44	AUGGCUGAGGCGGCU&AGCCGCCCCUGCCAU	(((((.(.(((((((&))))))).).)))))
C25A1.7.1	WBGene00002153	iars-2	1762	1781	PAO_14838	3	23	-17.86	AUGGAUGUAUGGCUGGAUUC&GAAUCCAGCCGCCCCUGCCAU	((((.....(((((((((((&)))))))))))......))))
F37B4.2.1	WBGene00002055	ifc-1	1249	1259	PAO_14838	3	13	-13.98	CGGCUGGAGGC&GAAUCCAGCCG	((((((((..(&)..))))))))
C12C8.1.1	WBGene00002026	hsp-70	951	964	PAO_14838	1	13	-10.28	CGUGCAAGAUUCGA&UCGAAUCCAGCCG	((.((..(((((((&)))))))..))))
Y22D7AL.5a.1	WBGene00002025	hsp-60	1691	1712	PAO_14838	1	22	-21.07	UGGAAUGGGCGGUAUGGGAGGA&UCGAAUCCAGCCGCCCCUGCCA	(((...(((((((.((((..((&))...)))))))))))...)))
Y46H3A.2.1	WBGene00002018	hsp-16.41	595	605	PAO_14838	1	10	-10.2	UUGUGAUUCGA&UCGAAUCCAG	(((.(((((((&))))))))))
F38E11.1.1	WBGene00002012	hsp-12.3	515	524	PAO_14838	15	23	-9.39	AUGGCAGCGG&CCCUGCCAU	(((((((.((&)))))))))
Y50E8A.16.1	WBGene00001817	haf-7	2281	2292	PAO_14838	3	15	-14.36	GGCGCUGGAUUC&GAAUCCAGCCGCC	((((((((((((&))))))))).)))
Y53F4B.33.1	WBGene00001787	gst-39	445	452	PAO_14838	3	10	-10.42	CUGGAUUC&GAAUCCAG	((((((((&))))))))
F11G11.2.1	WBGene00001755	gst-7	482	494	PAO_14838	1	13	-14.39	CGGCUGGAUCCGG&UCGAAUCCAGCCG	(((((((((.(((&))).)))))))))
C05E4.9a.1	WBGene00001564	icl-1	413	426	PAO_14838	8	23	-15.05	AUGGCAGGUGGCUG&CAGCCGCCCCUGCCAU	((((((((((((((&))))))))..))))))
W08D2.4a.1	WBGene00001395	fat-3	1163	1194	PAO_14838	1	22	-13.95	UGGCUUUGGGGUGGACUCAAUUAUCAGAUCGA&UCGAAUCCAGCCGCCCCUGCCA	((((...(((((((.((.........((((((&)))).)).))))))))).))))
K10D2.6.1	WBGene00001262	emb-8	1578	1584	PAO_14838	2	8	-8.77	GGAUUCG&CGAAUCC	(((((((&)))))))
Y105E8A.4.1	WBGene00001156	ech-7	546	558	PAO_14838	6	20	-13.8	GCAGUUGGUUGGG&UCCAGCCGCCCCUGC	((((.((((((((&))))))))...))))
F56B3.5.1	WBGene00001154	ech-5	273	290	PAO_14838	1	20	-19.07	GUAGUGGUGCGGAUUUGA&UCGAAUCCAGCCGCCCCUGC	((((.(((((((((((((&)))))))).).)))).))))
F49E8.5.1	WBGene00000996	dif-1	419	425	PAO_14838	5	11	-12.4	GCUGGAU&AUCCAGC	(((((((&)))))))
C45B11.3.1	WBGene00000981	dhs-18	135	146	PAO_14838	12	23	-9.93	GUGGUAGCAGCG&CGCCCCUGCCAU	(((((((..(((&)))..)))))))
R05D8.8.1	WBGene00000977	dhs-14	849	863	PAO_14838	10	23	-14.48	GUGGCAGAUGGAGGU&GCCGCCCCUGCCAU	(((((((..((.(((&))).)).)))))))
C17G10.8.1	WBGene00000970	dhs-6	1013	1021	PAO_14838	2	10	-12.77	CUGGAUUCG&CGAAUCCAG	(((((((((&)))))))))
F40E10.3.1	WBGene00000822	csq-1	115	126	PAO_14838	1	13	-10.12	CGACGGAUUCGA&UCGAAUCCAGCCG	((.(((((((((&)))))))).).))
W07B8.5.1	WBGene00000785	cpr-5	574	596	PAO_14838	2	23	-9.38	GUGGUGGGUCAAGCACGGUCUCG&CGAAUCCAGCCGCCCCUGCCAU	((((((((....((..((..(((&)))..)).))....))))))))
F44C4.3.1	WBGene00000784	cpr-4	60	72	PAO_14838	8	20	-8.86	GCCUUGGUGGCUG&CAGCCGCCCCUGC	((...((((((((&))))))))...))
C52E4.1.1	WBGene00000781	cpr-1	560	567	PAO_14838	16	23	-10.32	AUGGUGGG&CCUGCCAU	((((((((&))))))))
F49D11.8.1	WBGene00000780	cpn-4	109	121	PAO_14838	1	12	-11.14	GGAAUGGAUUCGG&UCGAAUCCAGCC	((..(((((((((&))))))))).))
F14H8.6b.1	WBGene00000562	cng-1	1636	1657	PAO_14838	1	23	-16.26	AUGGUGGUGGCGAUUAAUUUGA&UCGAAUCCAGCCGCCCCUGCCAU	(((((((.((((....((((((&)))))).....)))).)))))))
K01C8.10.1	WBGene00000379	cct-4	333	344	PAO_14838	3	13	-12.66	UGGCUGGAGCUC&GAAUCCAGCCG	((((((((..((&)).))))))))
F08F3.7.1	WBGene00000373	cyp-14A5	787	808	PAO_14838	1	23	-12.19	AUGAAGAUGCGGGAAGAUUUGA&UCGAAUCCAGCCGCCCCUGCCAU	(((.((..((((...(((((((&)))))))...))))..))..)))
C34E10.6.1	WBGene00000229	atp-2	977	988	PAO_14838	1	12	-12.79	GGCUGGAUCUGA&UCGAAUCCAGCC	((((((((.(((&))).))))))))
F26D10.9a.1	WBGene00000224	atgp-1	666	673	PAO_14838	3	10	-9.74	CUGGAUUC&GAAUCCAG	((((((((&))))))))
ZK455.4.1	WBGene00000212	asm-2	1236	1246	PAO_14838	1	11	-12.45	GCAGGAUUCGG&UCGAAUCCAGC	((.((((((((&)))))))).))
F29G9.3.1	WBGene00000159	aps-1	164	171	PAO_14838	1	8	-11.47	GGAUUUGA&UCGAAUCC	((((((((&))))))))
F54D8.3a.1	WBGene00000107	alh-1	662	670	PAO_14838	3	11	-12.71	GCUGGAUUC&GAAUCCAGC	(((((((((&)))))))))
C12D8.10a.1	WBGene00000102	akt-1	1169	1187	PAO_14838	2	22	-16.98	UGGUGGGGAGUUGGAGUUG&CGAAUCCAGCCGCCCCUGCCA	((((((((.((((((.(((&))).))))))...))))))))
F12E12.11.1	WBGene00044811	F12E12.11	340	347	PAO_14955	14	21	-14.91	CGAUCCUC&GAGGAUCG	((((((((&))))))))
C01B10.11.1	WBGene00044294	C01B10.11	1001	1022	PAO_14955	2	21	-21.2	CUUUUCUCCUUCCCCCUCCACU&GGUGGAGCCAAGGAGGAUCG	(..((((((((....(((((((&)))))))..))))))))..)
K02E11.10.1	WBGene00044109	K02E11.10	14	38	PAO_14955	3	21	-14.87	UGAUCUUAGCCUGCCUUGUCUCCAC&GUGGAGCCAAGGAGGAUCG	(((((((......(((((.((((((&)))))).))))))))))))
F43C1.7.1	WBGene00023423	F43C1.7	10	30	PAO_14955	1	21	-14.84	CGAUUUUUCUAGGAUUUUCCA&UGGUGGAGCCAAGGAGGAUCG	((((((((((.((.(((.(((&))).))).)).))))))))))
F54D7.7.1	WBGene00023068	rpl-41.2	198	222	PAO_14955	2	22	-18.99	UCGUCUCCUUGUUACCUACUCCAUC&GGUGGAGCCAAGGAGGAUCGA	(((((((((((.......(((((((&))))))).))))))))..)))
ZK697.14.1	WBGene00022809	ZK697.14	538	546	PAO_14955	13	22	-11.15	UCAUUCUCC&GGAGGAUCGA	(((((((((&))))))).))
ZK652.2.1	WBGene00022783	tomm-7	138	157	PAO_14955	1	20	-23	GAUCCUCCCUCUUUCCGCCA&UGGUGGAGCCAAGGAGGAUC	((((((((....((((((((&))))))))....))))))))
ZC97.1a.1	WBGene00022516	mtx-2	120	141	PAO_14955	2	21	-13.45	CGAUUUUGCUGAUUGCCUCGCC&GGUGGAGCCAAGGAGGAUCG	(((((((.((....((.(((((&))))).))..)).)))))))
Y82E9BR.18.1	WBGene00022350	Y82E9BR.18	2509	2538	PAO_14955	1	22	-19.61	UCGAUUCUUACAACACUUACGGCUCAGCCA&UGGUGGAGCCAAGGAGGAUCGA	(((((((((......(((..(((((.((((&)))).)))))))))))))))))
Y73C8C.2.1	WBGene00022261	clec-210	522	543	PAO_14955	1	21	-18.91	UGCUCCUUCUACUUCUUUACCA&UGGUGGAGCCAAGGAGGAUCG	((.(((((((....((((((((&))))))))...))))))).))
Y73C8B.1.1	WBGene00022258	Y73C8B.1	63	82	PAO_14955	1	19	-11.07	AUUUUCCAUCCUACCCGCCA&UGGUGGAGCCAAGGAGGAU	(((((((.......((((((&))))))......)))))))
Y58A7A.5.1	WBGene00021979	Y58A7A.5	873	890	PAO_14955	4	22	-12.54	UCGAUCUUGCUGCCUUCA&UGGAGCCAAGGAGGAUCGA	((((((((.(((.(((((&))))).)).).))))))))
Y54F10AM.5.1	WBGene00021849	Y54F10AM.5	87	107	PAO_14955	1	16	-15.58	CUCCAUGGCUCAAAUCCAUCG&UGGUGGAGCCAAGGAG	((((.((((.....(((((((&))))))))))).))))
Y54E10A.17a.1	WBGene00021835	Y54E10A.17	510	527	PAO_14955	1	17	-16.63	UCUCUUUUGCUCACUCCA&UGGUGGAGCCAAGGAGG	(((((((.((((.(.(((&))).))))).)))))))
Y53G8B.2.1	WBGene00021818	Y53G8B.2	755	767	PAO_14955	3	16	-14.48	CUCACGGCUCCGC&GUGGAGCCAAGGAG	(((..((((((((&))))))))...)))
Y50D4B.2a.1	WBGene00021741	Y50D4B.2	221	241	PAO_14955	1	21	-16.3	UGAUUCUCUGGGGUGCUAUCA&UGGUGGAGCCAAGGAGGAUCG	(((((((((..(((.((((((&)))))).)))..)))))))))
Y49C4A.8a.1	WBGene00021709	ugt-29	969	986	PAO_14955	2	20	-15.43	GACAAUUUUGGCUUCAUC&GGUGGAGCCAAGGAGGAUC	(((..(((((((((((((&)))))))))))))..).))
Y48G8AL.5a.1	WBGene00021686	nsun-2	527	544	PAO_14955	2	17	-17.37	CUUCUUUUGGCUCCAACU&GGUGGAGCCAAGGAGG	(((((((.(((((((.((&))))))))))))))))
Y46H3D.6a.1	WBGene00021610	nhr-237	670	689	PAO_14955	1	17	-14.65	CCAUACUGGAGGCUUCACCA&UGGUGGAGCCAAGGAGG	((...((...((((((((((&)))))))))).))..))
Y22D7AL.10.1	WBGene00021248	Y22D7AL.10	492	510	PAO_14955	2	18	-17.28	UUUUCCUUGAUUUUUCGCC&GGUGGAGCCAAGGAGGA	(((((((((...(((((((&))))))).)))))))))
W10D9.5b.1	WBGene00021133	tomm-22	251	274	PAO_14955	2	22	-11.61	UUGAUCUUUUCCUAGAUUUUCCCC&GGUGGAGCCAAGGAGGAUCGA	(((((((..((((.(...((((((&)).)))).).)))))))))))
W03G1.5.1	WBGene00021011	W03G1.5	613	631	PAO_14955	2	20	-16.1	GAUCUUCCCGAUCUCCAUC&GGUGGAGCCAAGGAGGAUC	((((((((....(((((((&)))))))....))))))))
W02F12.2.1	WBGene00020947	W02F12.2	773	789	PAO_14955	3	22	-16.6	UCGAUCUUCUCGUUCCC&GUGGAGCCAAGGAGGAUCGA	((((((((((.((((((&).)))))...))))))))))
R151.9.1	WBGene00020112	pfd-5	529	548	PAO_14955	2	23	-13.68	UUCGAUUUUAAUACUACACC&GGUGGAGCCAAGGAGGAUCGAA	(((((((((..(.((.((((&)))).))...)..)))))))))
R08F11.3.1	WBGene00019967	cyp-33C8	1494	1512	PAO_14955	3	21	-20.38	CGGUCUUCCAUCGCUCGAC&GUGGAGCCAAGGAGGAUCG	(((((((((.(.((((.((&)).)))).).)))))))))
R02E12.6.1	WBGene00019830	hrg-1	736	758	PAO_14955	1	21	-17.85	CGCUCUUGGCCGCCGCUCCACCA&UGGUGGAGCCAAGGAGGAUCG	((.((((..((...(((((((((&)))))))))...)))))).))
M60.7.1	WBGene00019782	M60.7	1464	1484	PAO_14955	1	21	-19.46	UGUUUUUCUUUGAAUCCAUCA&UGGUGGAGCCAAGGAGGAUCG	((.(((((((((..(((((((&)))))))..))))))))).))
M04F3.4b.1	WBGene00019770	M04F3.4	656	678	PAO_14955	3	22	-16.08	UCUUUCCUCCUCGGAUUCUUCGC&GUGGAGCCAAGGAGGAUCGA	((..(((((((.((...((((((&)))))))).)))))))..))
K11G9.1.1	WBGene00019652	cest-34	1503	1518	PAO_14955	2	22	-14.13	UCGAUCCGGCCCGUCC&GGUGGAGCCAAGGAGGAUCGA	(((((((((((((.((&))))).))).....)))))))
K09F6.10.1	WBGene00019593	K09F6.10	2234	2256	PAO_14955	1	23	-18.61	UUCAUCUUCCUCAUCCUCUUCCA&UGGUGGAGCCAAGGAGGAUCGAA	(((((((((((....((((.(((&))).))))...)))))))).)))
K08D9.4a.1	WBGene00019525	K08D9.4	73	92	PAO_14955	1	19	-13.72	AUUUUCCACGCUACCCGCCA&UGGUGGAGCCAAGGAGGAU	(((((((..(((..((((((&)))))))))...)))))))
K06A5.6.1	WBGene00019433	acdh-3	5	22	PAO_14955	2	19	-19.17	GUCUUCCUUGUCUCGGUC&GGUGGAGCCAAGGAGGAU	((((((((((.(((.(((&))).))).))))))))))
K02F2.2.1	WBGene00019322	ahcy-1	247	271	PAO_14955	2	19	-19.01	GUCUUCCUGCAACAUCUUCUCCACC&GGUGGAGCCAAGGAGGAU	((((((((..........(((((((&)))))))...))))))))
H06H21.6.1	WBGene00019163	ubxn-6	1176	1196	PAO_14955	2	19	-11.16	AUCUGCAUCGUUGGCUCAACU&GGUGGAGCCAAGGAGGAU	((((...((.(((((((.(((&))).))))))).))))))
F59B1.8.1	WBGene00019100	F59B1.8	555	578	PAO_14955	4	23	-11.31	UUUGAAGGCUCUUGCAAGGCUCCA&UGGAGCCAAGGAGGAUCGAA	(((((....((((.(..(((((((&)))))))..).)))))))))
F58F9.7.1	WBGene00019060	acox-3	253	271	PAO_14955	3	21	-12.12	CGAUCUUGAAAACUUCCAU&GUGGAGCCAAGGAGGAUCG	(((((((......((((((&))))))......)))))))
F57B10.3a.1	WBGene00019001	ipgm-1	1372	1390	PAO_14955	1	19	-16.84	GUGCAACUUUGCUCCACCA&UGGUGGAGCCAAGGAGGAU	((.(..(((.(((((((((&))))))))).)))..).))
F56C11.6a.1	WBGene00018958	cest-27	1336	1356	PAO_14955	3	18	-19.3	UCUUCCGUUUUUGGGCUCCAC&GUGGAGCCAAGGAGGA	((((((.......((((((((&))))))))..))))))
F54D11.1.1	WBGene00018811	pmt-2	1471	1490	PAO_14955	1	18	-16.31	UCUUCCUUGCCCAAAAACCA&UGGUGGAGCCAAGGAGGA	((((((((((((....((((&)))))).)).))))))))
F54A5.2a.1	WBGene00018787	cutl-20	1096	1121	PAO_14955	1	23	-19.15	UUCGUCUUCUUCUUCUUCUUCUGCCA&UGGUGGAGCCAAGGAGGAUCGAA	((((..((((((((....((((((((&))))))))..)))))))).))))
F53C3.6a.1	WBGene00018750	F53C3.6	835	861	PAO_14955	1	23	-18.45	UUCGAUCUUUCAACCGGUUUUAAAUCA&UGGUGGAGCCAAGGAGGAUCGAA	(((((((((((....((((((..((((&))))))))))..)))))))))))
F52E4.5.1	WBGene00018702	F52E4.5	721	733	PAO_14955	1	19	-9.78	GUUCUCUUCCCCA&UGGUGGAGCCAAGGAGGAU	(((((((((((((&))).))).....)))))))
F44E7.8a.1	WBGene00018430	nhr-142	645	653	PAO_14955	1	9	-15.46	GCUCCACCA&UGGUGGAGC	(((((((((&)))))))))
F44C8.1.1	WBGene00018413	cyp-33C4	1227	1243	PAO_14955	1	19	-9.49	AUCUUCCCAGACCCCUA&UGGUGGAGCCAAGGAGGAU	(((((((..(.((((((&))).)).).)..)))))))
F41G3.10.1	WBGene00018303	F41G3.10	396	416	PAO_14955	1	22	-9.74	UCGAUUUGACAAACCCAACCA&UGGUGGAGCCAAGGAGGAUCGA	(((((((..(...(((.((((&)))))).)....)..)))))))
F41C3.5.1	WBGene00018271	ctsa-1.1	217	235	PAO_14955	2	20	-11.75	GCUCUUCCUUGGACGGACU&GGUGGAGCCAAGGAGGAUC	(.((((((((((.(..(((&)))...))))))))))).)
F41B5.4.1	WBGene00018262	cyp-33C3	201	223	PAO_14955	1	20	-19.4	GAUCCUUUUAUUGGUUUUCACCG&UGGUGGAGCCAAGGAGGAUC	((((((((..(((((.(((((((&))))))))))))))))))))
F28C10.3.1	WBGene00017898	F28C10.3	327	345	PAO_14955	3	20	-18.79	GAUCCUCACCACAAUCCAC&GUGGAGCCAAGGAGGAUC	(((((((.......(((((&)))))......)))))))
F28A12.4.1	WBGene00017881	asp-13	785	800	PAO_14955	6	20	-18.09	GAUUUUCUCUUGGCUC&GAGCCAAGGAGGAUC	(((((((.((((((((&)))))))))))))))
F28A10.6.1	WBGene00017874	acdh-9	1332	1340	PAO_14955	12	20	-12.75	GAUUUUCCU&AGGAGGAUC	(((((((((&)))))))))
F22A3.6c.1	WBGene00017691	ilys-5	67	89	PAO_14955	2	21	-15.97	CGUUUCCGCCGACUGCCUCCACU&GGUGGAGCCAAGGAGGAUCG	((..(((.((...((.(((((((&))))))).)).)).))).))
F21F8.11.1	WBGene00017681	slc-17.5	873	891	PAO_14955	1	18	-17.58	UCCUCCAAAACAUCCAUCA&UGGUGGAGCCAAGGAGGA	((((((......(((((((&))))))).....))))))
F18E3.11.1	WBGene00017567	F18E3.11	111	129	PAO_14955	1	18	-15.82	UUCUGCUUCGUCUUCAUCA&UGGUGGAGCCAAGGAGGA	((((.(((.(.((((((((&))))))))).))).))))
F16B4.9.1	WBGene00017510	nhr-178	411	430	PAO_14955	1	20	-15.98	GACCUACCUUCACUUCAUCA&UGGUGGAGCCAAGGAGGAUC	(((((.((((..((((((((&))))))))..))))))).))
F15E6.6.1	WBGene00017487	F15E6.6	977	990	PAO_14955	3	19	-18.39	AUUCUCCUCUCCAC&GUGGAGCCAAGGAGGAU	((((((((((((((&))))))...))))))))
F14F9.4.1	WBGene00017467	F14F9.4	24	43	PAO_14955	2	22	-20.6	UCGUCUUCUUUGGAACCAUC&GGUGGAGCCAAGGAGGAUCGA	(((((((((((((..(((((&)))))..)))))))))).)))
F13C5.1.1	WBGene00017422	F13C5.1	750	769	PAO_14955	1	22	-19.73	UCAUCCUCCUCAUCUACACA&UGGUGGAGCCAAGGAGGAUCGA	((((((((((..(((((.((&)))))))....)))))))).))
F10E7.8a.1	WBGene00017349	farl-11	1416	1436	PAO_14955	1	20	-23.78	GAUUCUCCAGGCGCUUCAUCA&UGGUGGAGCCAAGGAGGAUC	((((((((..(.(((((((((&))))))))))..))))))))
F09F7.8.1	WBGene00017305	nspb-12	112	131	PAO_14955	2	22	-17.62	UCGGCCGCCUAUGUUCCAUC&GGUGGAGCCAAGGAGGAUCGA	((((((.(((..((((((((&))))))))..))).)).))))
F09E5.3.1	WBGene00017283	F09E5.3	858	874	PAO_14955	3	19	-20.46	AUCCUCACUUGUUCCGC&GUGGAGCCAAGGAGGAU	((((((.((((((((((&))))))).)))))))))
F07F6.8.1	WBGene00017220	F07F6.8	982	1005	PAO_14955	1	23	-18.28	UUUGAAUUUUUCUGGGUUUCACUA&UGGUGGAGCCAAGGAGGAUCGAA	(((((.(((((((.((((((((((&)))))))))).))))))))))))
DC2.5a.1	WBGene00017082	DC2.5	656	675	PAO_14955	1	23	-20.66	UUCGAUCGUCAGCUCCAUCA&UGGUGGAGCCAAGGAGGAUCGAA	(((((((.((.(((((((((&)))))))))....)).)))))))
D2096.8.1	WBGene00017075	nap-1	801	817	PAO_14955	1	16	-16.03	UUCCUUGAGCUCGACUA&UGGUGGAGCCAAGGAG	(((((((.((((.((((&)))).)))))))))))
D2063.1.1	WBGene00017060	D2063.1	14	36	PAO_14955	2	19	-12.85	AUCUUCUCAACAAUGGUUUCAUC&GGUGGAGCCAAGGAGGAU	(((((((......((((((((((&)))))))))).)))))))
CD4.7b.1	WBGene00016992	zhit-1	514	520	PAO_14955	11	17	-9.99	CCUCCUU&AAGGAGG	(((((((&)))))))
C54G7.2.1	WBGene00016934	mboa-3	775	798	PAO_14955	2	23	-12.8	UUCCAUUCUUCCAGUGGUUCUUCU&GGUGGAGCCAAGGAGGAUCGAA	(((.(((((((...(((((((.((&)).))))))).))))))).)))
C49G7.3.1	WBGene00016781	C49G7.3	59	80	PAO_14955	3	22	-21.37	UUGAUUGCUUUUCUGGCUCCAC&GUGGAGCCAAGGAGGAUCGA	((((((.(((((.(((((((((&))))))))))))))))))))
C49A9.8.1	WBGene00016762	ugt-24	1060	1081	PAO_14955	3	23	-21.34	UUCAUUUCUUCUUGGCUGCCAC&GUGGAGCCAAGGAGGAUCGAA	(((..((((((((((((.((((&))))))))))))))))..)))
C44B7.10.1	WBGene00016630	acer-1	388	414	PAO_14955	2	23	-14.93	UUCAUGCUUCUUGUACGAAGUUCCACU&GGUGGAGCCAAGGAGGAUCGAA	(((((.(((((((......((((((((&))))))))))))))).)).)))
C37H5.3a.1	WBGene00016507	abhd-5.2	783	799	PAO_14955	4	21	-19.05	CGAUCCUUGGGGCUUCA&UGGAGCCAAGGAGGAUCG	((((((((..(((((((&)))))))...))))))))
C35B1.2a.1	WBGene00016432	C35B1.2	981	989	PAO_14955	13	21	-15.05	CGAUCCUCU&GGAGGAUCG	(((((((((&)))))))))
C29F5.1.1	WBGene00016210	C29F5.1	798	818	PAO_14955	1	20	-12.33	GAUAAAUCUGAAGUUCUGCCA&UGGUGGAGCCAAGGAGGAUC	(((...(((...(((((((((&)))))))))...)))..)))
C23H5.8b.1	WBGene00016027	C23H5.8	565	582	PAO_14955	2	18	-13.53	UCCUACUGUAUCUCUACC&GGUGGAGCCAAGGAGGA	((((.((....(((((((&)))))))....))))))
C17C3.1b.1	WBGene00015887	C17C3.1	11	40	PAO_14955	1	23	-17.58	UUCGAUACUCUUUUCCUUGUUUUCUCAUCA&UGGUGGAGCCAAGGAGGAUCGAA	(((((.....(((((((((..(((.(((((&)))))))).))))))))))))))
C15B12.8.1	WBGene00015788	C15B12.8	878	898	PAO_14955	1	21	-16.19	CGAUCCCAGGAAGCUUUAUCA&UGGUGGAGCCAAGGAGGAUCG	(((((((.....(((((((((&)))))))))....).))))))
C12D5.7.1	WBGene00015709	cyp-33A1	306	323	PAO_14955	1	18	-23.09	UUCUCCUAUCCUCCACCA&UGGUGGAGCCAAGGAGGA	(((((((...((((((((&))))))))...)))))))
C10H11.4.1	WBGene00015693	ugt-28	801	823	PAO_14955	1	23	-17.53	UUCAAUUUUCUUUGUCAACGCCA&UGGUGGAGCCAAGGAGGAUCGAA	(((.((((((((((.(..(((((&)))))..).)))))))))).)))
C07G3.2.1	WBGene00015574	irg-1	96	107	PAO_14955	4	17	-11.51	CCUCCGGCUUUG&UGGAGCCAAGGAGG	((((((((((((&)))))))..)))))
C07D10.2a.1	WBGene00015567	bath-44	1386	1414	PAO_14955	2	23	-18.42	UUCGACCUCUUUUUCAUUUUCUGCCCAUC&GGUGGAGCCAAGGAGGAUCGAA	((((((((((((..........(((((((&))))).)).))))))).)))))
C06E7.1a.1	WBGene00015538	sams-3	120	137	PAO_14955	6	22	-14.97	UUGAUGCUCAUUUGGCUC&GAGCCAAGGAGGAUCGA	(((((.(((.((((((((&))))))))))).)))))
C06A8.1b.1	WBGene00015512	mthf-1	134	149	PAO_14955	3	22	-15.83	UCGAUUCUCUGUCCAC&GUGGAGCCAAGGAGGAUCGA	((((((((((((((((&))))).)...))))))))))
C01B12.3.1	WBGene00015286	best-3	1895	1912	PAO_14955	2	20	-10.69	GAUCCCUUUCAUUUCAUU&GGUGGAGCCAAGGAGGAUC	(((((((((..(((((((&)))))))..)))).)))))
B0361.8.1	WBGene00015162	algn-11	469	491	PAO_14955	1	22	-14.09	UCGAUUCAAUGGGAUAUCCACUA&UGGUGGAGCCAAGGAGGAUCGA	(((((((....((...(((((((&))))))).)).....)))))))
B0205.6.1	WBGene00015021	nfs-1	1012	1027	PAO_14955	4	17	-16.58	CCUUCUGAUGGCUCUA&UGGAGCCAAGGAGG	((((((..((((((((&))))))))))))))
K08E5.1b.1	WBGene00014801	K08E5.1	648	654	PAO_14955	13	19	-8.95	GUCCUUC&GGAGGAU	(((((((&)))))))
ZK1320.4.1	WBGene00014254	cyp-13A10	1149	1168	PAO_14955	2	23	-16	UUCGAUACAACUGCUCUAUC&GGUGGAGCCAAGGAGGAUCGAA	((((((.(..((((((((((&))))))))..))..).))))))
ZK896.5.1	WBGene00014136	ZK896.5	1103	1120	PAO_14955	1	20	-21.18	GAUUCUUCUCCUCCGCCA&UGGUGGAGCCAAGGAGGAUC	(((((((((.((((((((&))))))))...)))))))))
ZK822.5a.1	WBGene00014092	ZK822.5	539	562	PAO_14955	3	23	-21.74	UUUGGUUUUAAUCUUUGGCUGCAC&GUGGAGCCAAGGAGGAUCGAA	((((((((...(((((((((.(((&))).)))))))))))))))))
ZK632.3.1	WBGene00014012	riok-3	1628	1653	PAO_14955	2	23	-14.33	UUUUUUGCUCCUUUGGUUUGUUUACU&GGUGGAGCCAAGGAGGAUCGAA	(((..(.((((.(((((((...((((&))))))))))))))).)..)))
ZK617.2.1	WBGene00014009	lips-6	706	727	PAO_14955	1	20	-16.57	GCAUUCAACUUGGCAUCCACUG&UGGUGGAGCCAAGGAGGAUC	(.((((..((((((.(((((((&)))))))))))))..)))))
ZC376.7a.1	WBGene00013878	atfs-1	1683	1705	PAO_14955	1	23	-15.53	UUCGAUCCCAAAUUUCCCAUCCA&UGGUGGAGCCAAGGAGGAUCGAA	(((((((((.......(((.(((&)))))).......).))))))))
Y73F4A.2.1	WBGene00013515	Y73F4A.2	69	92	PAO_14955	1	23	-15.37	UUCUUUUUGCCUUUGCAUCCGCCA&UGGUGGAGCCAAGGAGGAUCGAA	(((..(((.((((.((.(((((((&))))))))).)))).)))..)))
Y60A3A.7.1	WBGene00013358	abhd-3.1	1113	1123	PAO_14955	13	23	-15.23	UUUGAUCUUCC&GGAGGAUCGAA	(((((((((((&)))))))))))
Y57G11C.34.1	WBGene00013324	mrps-7	714	735	PAO_14955	1	22	-13.82	UCGUUUCUCUUUUGUUUUGUUA&UGGUGGAGCCAAGGAGGAUCGA	(((.((((((((.(((((((((&))))))))).)))))))).)))
Y57A10C.6.1	WBGene00013284	daf-22	576	596	PAO_14955	1	19	-10.59	AUCCAAAAUCCCAGUUCACCA&UGGUGGAGCCAAGGAGGAU	((((....(((...(((((((&))))))).....)))))))
Y51A2D.9b.1	WBGene00013077	ttr-24	19	35	PAO_14955	2	22	-11.82	UCGAUUCCCGGUCGACU&GGUGGAGCCAAGGAGGAUCGA	(((((((((((((.(((&))).)).))..)).)))))))
Y46G5A.18a.1	WBGene00012908	Y46G5A.18	543	561	PAO_14955	3	21	-16.08	CGACUUCAUCCGGCUCCGC&GUGGAGCCAAGGAGGAUCG	(((.(((.(((((((((((&))))))))..)))))))))
Y38F1A.6.1	WBGene00012608	hphd-1	963	989	PAO_14955	2	23	-15.19	UUCGUCCACUUUAUCAAGGUUCCAACC&GGUGGAGCCAAGGAGGAUCGAA	(((((((.((((.....(((((((.((&))))))))))))).))).))))
W09H1.5.1	WBGene00012375	mecr-1	424	437	PAO_14955	1	16	-18.18	CUCGGGCUCCACCA&UGGUGGAGCCAAGGAG	(((.((((((((((&))))))))))...)))
R107.5a.1	WBGene00011300	R107.5	709	725	PAO_14955	1	16	-18.73	CUCCAAUGGCUUCGCCA&UGGUGGAGCCAAGGAG	((((..(((((((((((&))))))))))).))))
R53.4.1	WBGene00011273	R53.4	396	427	PAO_14955	1	22	-21.17	UCGUUCCUCAAUUGGCUCGUCAAGUCUCACCG&UGGUGGAGCCAAGGAGGAUCGA	(((.(((((..(((((((.........(((((&)))))))))))).))))).)))
R11A5.4a.1	WBGene00011232	pck-2	108	139	PAO_14955	1	23	-17.49	UUCGUCUCUUCUUUCCGUGUGCUCUUAAACCA&UGGUGGAGCCAAGGAGGAUCGAA	((((..(((((((....((.(((((...((((&)))))))))))))))))).))))
R07E5.2.1	WBGene00011110	prdx-3	205	225	PAO_14955	2	23	-19.15	UUCUAUCCACUUGACUUCACC&GGUGGAGCCAAGGAGGAUCGAA	(((.((((.((((.(((((((&))))))).))))..)))).)))
R07E3.1a.1	WBGene00011102	R07E3.1	871	898	PAO_14955	1	22	-20.85	UCGAUCUUCCAUAUGUAGCUCAUCGCCA&UGGUGGAGCCAAGGAGGAUCGA	((((((((((...((..((((..(((((&))))))))))).))))))))))
R04B5.6.1	WBGene00011004	R04B5.6	340	360	PAO_14955	1	21	-13.49	CGUUUUUUCGCUACUCCACCA&UGGUGGAGCCAAGGAGGAUCG	((.((((((....((((((((&))))))))....)))))).))
R03D7.1.1	WBGene00010988	metr-1	699	715	PAO_14955	1	17	-17.34	UUUCCUUGUGUCCACCA&UGGUGGAGCCAAGGAGG	((((((((..(((((((&)))))))..))))))))
M88.1.1	WBGene00010904	ugt-62	782	791	PAO_14955	12	21	-13.97	CGAUCUUCCU&AGGAGGAUCG	((((((((((&))))))))))
M05D6.6.2	WBGene00010879	taap-1	46	67	PAO_14955	1	19	-18.03	AUCUUCCUUUAGGUUCUUGCUA&UGGUGGAGCCAAGGAGGAU	(((((((((..(((((.(((((&)))))))))))))))))))
K12G11.3.1	WBGene00010790	sodh-1	869	878	PAO_14955	13	22	-15.81	UCGGUCUUCC&GGAGGAUCGA	((((((((((&))))))))))
K09A9.1.1	WBGene00010700	nipi-3	1113	1131	PAO_14955	4	21	-14.63	CGUUCCAUUCAUGGCUCCG&UGGAGCCAAGGAGGAUCG	((.(((.(((.((((((((&)))))))).)))))).))
K07C5.4.1	WBGene00010627	nol-56	619	640	PAO_14955	1	18	-14.78	UCUUCCGUCUGGCUCCAGAUCA&UGGUGGAGCCAAGGAGGA	((((((...((((((((..(((&))))))))))).))))))
K02A11.3.1	WBGene00010488	endu-1	470	485	PAO_14955	3	17	-10.34	CAACUUUGGUUUUCAC&GUGGAGCCAAGGAGG	(..((((((((.((((&))))))))))))..)
K01D12.10.1	WBGene00010469	K01D12.10	64	72	PAO_14955	1	9	-13.24	GCUCCAUCA&UGGUGGAGC	(((((((((&)))))))))
F59A2.3.1	WBGene00010303	cri-3	559	575	PAO_14955	3	22	-15.54	UCGAUCCAGACCUCCAC&GUGGAGCCAAGGAGGAUCGA	(((((((...(((((((&))))))....)..)))))))
F54D5.12.1	WBGene00010055	F54D5.12	566	579	PAO_14955	6	19	-15.07	AUCUUCUCGGGCUC&GAGCCAAGGAGGAU	(((((((..(((((&)))))..)))))))
F53F4.10.1	WBGene00009992	F53F4.10	213	230	PAO_14955	2	21	-11.27	UGGUGCUCUUAUUCCACU&GGUGGAGCCAAGGAGGAUCG	((((.(((((.(((((((&)))))))...))))).))))
F53A2.7.1	WBGene00009952	acaa-2	1290	1300	PAO_14955	13	23	-11.43	UUCCAUCUUCC&GGAGGAUCGAA	(((.(((((((&))))))).)))
F49E12.9a.1	WBGene00009902	drd-1	794	814	PAO_14955	1	21	-15.96	CGGUUCUUUUAGGUCCAACUA&UGGUGGAGCCAAGGAGGAUCG	((((((((((.(((((.((((&))))))).)).))))))))))
F44G3.2.1	WBGene00009706	argk-1	911	923	PAO_14955	2	14	-14.72	CCUUGGUUCAACU&GGUGGAGCCAAGG	(((((((((.(((&))).)))))))))
F44A6.5.1	WBGene00009677	F44A6.5	623	640	PAO_14955	1	19	-17.43	AUCCUGCUGCCUCCGCUG&UGGUGGAGCCAAGGAGGAU	(((((.(((.((((((((&)))))))).).)).)))))
F32D8.12a.1	WBGene00009334	F32D8.12	1183	1189	PAO_14955	13	19	-11.64	AUCCUCC&GGAGGAU	(((((((&)))))))
F28F8.2.1	WBGene00009221	acs-2	599	625	PAO_14955	1	19	-15.41	AUCCCAUGACAUCCCAGAGCUCCGCCA&UGGUGGAGCCAAGGAGGAU	((((.......(((..(.(((((((((&))))))))))..)))))))
F27D4.1.1	WBGene00009187	F27D4.1	268	292	PAO_14955	2	19	-13.27	AUCUUCCAGAACGAGUGGCUCCAGU&GGUGGAGCCAAGGAGGAU	(((((((........((((((((.(&).)))))))).)))))))
F22B5.4.1	WBGene00009042	F22B5.4	256	274	PAO_14955	1	19	-13.24	AUCAAUUCCUUGUCCGCCG&UGGUGGAGCCAAGGAGGAU	(((..((((((((((((((&)))))))..))))))))))
F14F7.3.1	WBGene00008810	cyp-13A12	1098	1115	PAO_14955	2	18	-18.86	UCCUCCUGGCAACUCACC&GGUGGAGCCAAGGAGGA	((((((((((...(((((&))))).))).)))))))
F11C1.5a.1	WBGene00008694	vwa-8	1257	1281	PAO_14955	3	22	-16.32	UCGAGAAUCCUUGGCGAACUUUCAC&GUGGAGCCAAGGAGGAUCGA	((((...((((((((.....(((((&)))))))))))))...))))
F09F3.6.1	WBGene00008628	ttr-21	240	255	PAO_14955	1	19	-18.46	AUGCUCCUCUCCAUCA&UGGUGGAGCCAAGGAGGAU	((.(((((((((((((&))))))))...))))).))
F09B12.3.1	WBGene00008607	F09B12.3	602	616	PAO_14955	2	17	-16.74	CCUACGAGCUUCACC&GGUGGAGCCAAGGAGG	(((.(..((((((((&))))))))...).)))
F08H9.6.1	WBGene00008594	clec-57	1203	1234	PAO_14955	1	23	-14.21	UUCAAUCUUCCAACUUGAUCUUAAUACCACCA&UGGUGGAGCCAAGGAGGAUCGAA	(((.(((((((...(((..((.....((((((&)))))))).)))))))))).)))
F08A8.3.1	WBGene00008566	acox-1.3	1854	1871	PAO_14955	2	20	-15.27	GAUCUGUUCUUGGCCGCC&GGUGGAGCCAAGGAGGAUC	(((((.((((((((((((&))))..)))))))))))))
F02A9.4.1	WBGene00008514	mrpl-44	1553	1572	PAO_14955	5	22	-20.27	UUUGUCCUCCCAUCGGCUCC&GGAGCCAAGGAGGAUCGA	((.(((((((....((((((&))))))..))))))).))
E03H4.7.1	WBGene00008475	oac-13	771	790	PAO_14955	2	21	-19.5	CUUUCCUCUGAAGCUUCAUC&GGUGGAGCCAAGGAGGAUCG	(..((((((...((((((((&))))))))...))))))..)
DH11.2.1	WBGene00008436	DH11.2	825	847	PAO_14955	1	22	-13.03	UCGAUAAACGAAAAGCUUCACCG&UGGUGGAGCCAAGGAGGAUCGA	(((((...(.....(((((((((&)))))))))...)....)))))
D1025.4.1	WBGene00008356	nspc-20	46	69	PAO_14955	2	23	-14.26	UUCGCAUCCUUGCUGCUCUCUGCU&GGUGGAGCCAAGGAGGAUCGAA	((((.((((((.((...(((((((&)))))))...))))))))))))
C55A6.5.1	WBGene00008334	sdz-8	464	485	PAO_14955	1	22	-21.91	UCAUCUGGACUUGGUUCCAUCA&UGGUGGAGCCAAGGAGGAUCGA	((((((...(((((((((((((&)))))))))))))..)))).))
C54D10.1.1	WBGene00008296	cdr-2	360	374	PAO_14955	1	19	-12.48	AUCCCAUCUCUACCA&UGGUGGAGCCAAGGAGGAU	(((((..((((((((&)))))))).....).))))
C52G5.2.1	WBGene00008260	C52G5.2	375	395	PAO_14955	1	22	-12.89	UUGAUCCAGUUGGAAACGCCA&UGGUGGAGCCAAGGAGGAUCGA	(((((((..((((...(((((&)))))...))))...)))))))
C47E12.4a.1	WBGene00008149	pyp-1	1334	1353	PAO_14955	1	18	-19.08	UUCUUUUUGGUUUACCACCA&UGGUGGAGCCAAGGAGGA	((((((((((((..((((((&))))))))))))))))))
C37A5.1.1	WBGene00007988	best-8	1286	1298	PAO_14955	3	15	-17.83	UCCAUGGCUCCAC&GUGGAGCCAAGGA	(((.(((((((((&))))))))).)))
C36A4.9b.1	WBGene00007969	acs-19	79	101	PAO_14955	2	23	-20.35	UUCAGAUUUUCCUCCCUCCAGCC&GGUGGAGCCAAGGAGGAUCGAA	(((.(((((((((..(((((.((&)))))))...))))))))))))
C34C12.8.1	WBGene00007927	C34C12.8	726	745	PAO_14955	5	23	-14.02	UUUAAUUUUCCUCUGGUUUU&GGAGCCAAGGAGGAUCGAA	(((.((((((((.(((((((&))))))))))))))).)))
C33A12.3a.1	WBGene00007882	C33A12.3	239	261	PAO_14955	1	22	-18.65	UCGAUCCACCAGGAAUAACACCA&UGGUGGAGCCAAGGAGGAUCGA	(((((((.((.((.....(((((&)))))...))..)).)))))))
C31E10.7.1	WBGene00007848	cytb-5.1	353	373	PAO_14955	2	23	-15.48	UUCGCCCUUCUUGCUGUCAUU&GGUGGAGCCAAGGAGGAUCGAA	((((.((((((((((.(((((&)))))))).)))))))..))))
C30H6.7a.1	WBGene00007824	dlat-2	922	942	PAO_14955	2	21	-17.9	CGAUUCCUUCUUCACUUCUCC&GGUGGAGCCAAGGAGGAUCG	((((.(((((((..((((.((&)).))))..)))))))))))
C29F7.2a.1	WBGene00007811	C29F7.2	772	787	PAO_14955	3	20	-13.72	GAUCUUUGGGCCCCAC&GUGGAGCCAAGGAGGAUC	(((((((.(((.((((&)))).)))...)))))))
C27A7.5d.1	WBGene00007756	C27A7.5	77	95	PAO_14955	2	21	-18.07	CCAUUCUUUUGGCCCCGCC&GGUGGAGCCAAGGAGGAUCG	(.(((((((((((.(((((&))))).)))).))))))).)
C15C8.3a.1	WBGene00007605	hrg-7	580	600	PAO_14955	1	22	-14.2	UUGAUACUUUCUGUUUCACUA&UGGUGGAGCCAAGGAGGAUCGA	(((((.(((((((((((((((&)))))))))..)))))))))))
C14C10.3a.1	WBGene00007586	ril-2	1335	1354	PAO_14955	4	22	-15.94	UCUAUUUUCUCUGUGCUCUA&UGGAGCCAAGGAGGAUCGA	((.(((((((.((.((((((&)))))))).))))))).))
C14B1.3.1	WBGene00007574	C14B1.3	15	37	PAO_14955	2	23	-12.85	UUCCAUUCUCUGCGUCUCUCUCC&GGUGGAGCCAAGGAGGAUCGAA	(((.(((((((..(.((((..((&)).)))).)..))))))).)))
C14A4.14.1	WBGene00007564	mrps-22	533	558	PAO_14955	1	21	-15.77	CGAAUCGUUCUGUGAAUCCUCCACCA&UGGUGGAGCCAAGGAGGAUCG	(((.((.((((.((....((((((((&)))))))).)))))).)))))
C06H2.1.1	WBGene00007385	atp-5	615	641	PAO_14955	1	22	-20.56	UCGUUCUUCCUUAUCGCUCUCCUACCA&UGGUGGAGCCAAGGAGGAUCGA	(((.((((((((...(((((...((((&))))))))).)))))))).)))
C05C10.4.1	WBGene00007331	pho-11	418	438	PAO_14955	2	22	-15.88	UCCCCACUCACUUGGUUCCCU&GGUGGAGCCAAGGAGGAUCGA	((....(((.(((((((((((&)).))))))))))))....))
C01A2.4.1	WBGene00007216	C01A2.4	460	476	PAO_14955	5	22	-12.5	UCGAUUCUCGACGCACC&GGAGCCAAGGAGGAUCGA	(((((((((...((.((&)).))....)))))))))
B0564.1a.1	WBGene00007201	exos-4.1	509	521	PAO_14955	5	17	-17.31	CUUCUUUGGCUCU&GGAGCCAAGGAGG	(((((((((((((&)))))))))))))
B0457.6.1	WBGene00007180	B0457.6	426	446	PAO_14955	1	20	-23.65	GACUUCCUUGGUCUUCCACCA&UGGUGGAGCCAAGGAGGAUC	((((((((((((..(((((((&))))))))))))))))).))
B0399.2.1	WBGene00007177	oac-1	879	897	PAO_14955	2	20	-21.88	GAUGCUGUUUGGCUCCGCC&GGUGGAGCCAAGGAGGAUC	(((.((.((((((((((((&)))))))))))).)).)))
B0285.4.1	WBGene00007137	lcmt-1	739	760	PAO_14955	1	21	-17.81	CGAACUUCUGAUGCAUUCACCA&UGGUGGAGCCAAGGAGGAUCG	(((.(((((...((.(((((((&)))))))))...))))).)))
B0272.3.1	WBGene00007129	B0272.3	429	443	PAO_14955	2	16	-14.49	CUUCUUCACUUCGCC&GGUGGAGCCAAGGAG	((((((..(((((((&)))))))..))))))
C16A3.7.1	WBGene00007048	nfx-1	319	342	PAO_14955	1	23	-25.06	UUCGAUCCAUCUGUGCCUCCACCG&UGGUGGAGCCAAGGAGGAUCGAA	((((((((.(((.((.((((((((&)))))))).)).)))))))))))
W01A8.1b.1	WBGene00007024	plin-1	1299	1318	PAO_14955	2	23	-24.81	UUCCCCUCCUUCGCACCACC&GGUGGAGCCAAGGAGGAUCGAA	(((.(((((((.((.(((((&))))).)).)))))))...)))
K07E3.8.1	WBGene00006890	vem-1	116	130	PAO_14955	1	16	-19.53	CUCCCAGCUCCACCA&UGGUGGAGCCAAGGAG	((((..(((((((((&)))))))))...))))
C01G6.6a.1	WBGene00006510	mtrr-1	276	296	PAO_14955	1	21	-14.88	CGUUCUUCUCGGUCUCGGCGA&UGGUGGAGCCAAGGAGGAUCG	(((((((((.((.(((.((.(&).)).))))).))))))).))
E02H1.3.1	WBGene00006473	tag-124	875	883	PAO_14955	13	21	-15.93	CGAUCCUUC&GGAGGAUCG	(((((((((&)))))))))
C31C9.1a.1	WBGene00006404	tag-10	798	813	PAO_14955	5	20	-13.74	GAUCCUUCUUCACUCC&GGAGCCAAGGAGGAUC	((((((((((..((((&))))..))))))))))
K11D12.3a.1	WBGene00005655	srr-4	830	851	PAO_14955	1	21	-15.95	CUUUUCUGCUUCUUCUCCAUCA&UGGUGGAGCCAAGGAGGAUCG	(..((((.(((...((((((((&))))))))..))).))))..)
C27B7.1b.1	WBGene00005007	spr-2	1027	1057	PAO_14955	2	22	-13.16	UCGAUCCCGUUUUUGUAAGUAUUUAUUCACU&GGUGGAGCCAAGGAGGAUCGA	(((((((..((((((..........((((((&))))))..)))))))))))))
C54G6.5.1	WBGene00005002	spp-17	27	46	PAO_14955	2	22	-17.45	UCGUCCUUCUGCUCGUCGCC&GGUGGAGCCAAGGAGGAUCGA	((((((((((((((..((((&))))))))..))))))).)))
C28C12.7a.1	WBGene00004995	spp-10	594	611	PAO_14955	3	21	-14.62	CCAUUCUCCAAGAUCCAC&GUGGAGCCAAGGAGGAUCG	(.(((((((....(((((&))))).....))))))).)
Y71F9B.4.1	WBGene00004920	snr-7	92	112	PAO_14955	1	19	-17.1	AUCCUCCGCGGUUUCGAUCCA&UGGUGGAGCCAAGGAGGAU	(((((((..(((((((..(((&))))))))))..)))))))
F56E10.4.1	WBGene00004496	rps-27	164	182	PAO_14955	1	19	-15.94	GUCUUCUCGCACGCCACCA&UGGUGGAGCCAAGGAGGAU	(((((((.((...((((((&)))))).))...)))))))
C27A2.2a.1	WBGene00004434	rpl-22	297	314	PAO_14955	4	17	-14.16	CCUCCGUGAUUGGCUCCG&UGGAGCCAAGGAGG	(((((....(((((((((&))))))))))))))
C12D8.11.1	WBGene00004405	rop-1	1428	1444	PAO_14955	5	21	-20.81	CGAUACUGCUUGGCUCU&GGAGCCAAGGAGGAUCG	((((.((.(((((((((&))))))))).)).))))
D2023.2a.1	WBGene00004258	pyc-1	17	37	PAO_14955	1	21	-18.45	CGGUUCUCCCGCAUCCCACCG&UGGUGGAGCCAAGGAGGAUCG	(((((((((.((...((((((&)))))).))...)))))))))
Y37E3.9.1	WBGene00004014	phb-1	313	332	PAO_14955	2	22	-16.85	UCGUCUUCCAAACAUCUACC&GGUGGAGCCAAGGAGGAUCGA	(((((((((.....((((((&)))))).....))))))).))
F22E10.3.1	WBGene00004008	pgp-14	421	439	PAO_14955	1	17	-20.57	CCUUCUUGUCUAUCCACCA&UGGUGGAGCCAAGGAGG	((((((((....(((((((&)))))))..))))))))
C47A10.1.1	WBGene00004003	pgp-9	2936	2957	PAO_14955	2	23	-18.09	UUCAUUCUCCUUUGGUACUAUU&GGUGGAGCCAAGGAGGAUCGAA	((((((((((((.(((.(((((&))))).)))))))))))).)))
C05A9.1b.1	WBGene00003999	pgp-5	22	41	PAO_14955	3	22	-19.84	UUUUUCCUUGUUGGCUUUGC&GUGGAGCCAAGGAGGAUCGA	((..(((((.((((((((((&)))))))))).)))))..))
F42E11.1a.1	WBGene00003998	pgp-4	2393	2413	PAO_14955	2	23	-19.47	UUCGUUCUUCUGGCUGUUACC&GGUGGAGCCAAGGAGGAUCGAA	(((((((((((((((.(((((&))))))))).))))))).))))
K08E7.9.1	WBGene00003995	pgp-1	2527	2546	PAO_14955	1	23	-14.08	UUGGAUUCUUCGAUUCACCA&UGGUGGAGCCAAGGAGGAUCGAA	((.((((((((..(((((((&))))))).....)))))))).))
F54C1.7.1	WBGene00003934	pat-10	33	39	PAO_14955	2	8	-9.62	CUCCGCC&GGUGGAG	(((((((&)))))))
M117.2a.2	WBGene00003920	par-5	890	909	PAO_14955	4	23	-17.06	UUCGGUCUUCAAGUGCUCUA&UGGAGCCAAGGAGGAUCGAA	((((((((((....((((((&))))))....))))))))))
C52B9.7a.1	WBGene00003907	paf-2	247	264	PAO_14955	1	19	-15.37	AUCCAUUAUGGCUUCCUA&UGGUGGAGCCAAGGAGGAU	((((.((.((((((((((&))).))))))).)).))))
K11C4.4.1	WBGene00003844	odc-1	726	746	PAO_14955	2	20	-17.71	GAUCCUCCGCAUUGCUGUAUC&GGUGGAGCCAAGGAGGAUC	((((((((.....(((.((((&)))).)))...))))))))
C15H11.3.1	WBGene00003834	nxf-1	1962	1988	PAO_14955	1	23	-16.46	UUCCCCUCUUUCGAACUAGCUCCUCCA&UGGUGGAGCCAAGGAGGAUCGAA	(((.(((((((.(.....(((((.(((&))).)))))))))))))...)))
VC5.5.1	WBGene00003725	nhr-135	87	101	PAO_14955	4	19	-14.12	GUCACUUUGGCUCUA&UGGAGCCAAGGAGGAU	(((.(((((((((((&)))))))))))..)))
C06G3.1a.1	WBGene00003695	nhr-105	610	626	PAO_14955	1	19	-14.34	GUCCUCCAUCAAUACCA&UGGUGGAGCCAAGGAGGAU	(((((((.....(((((&))))).......)))))))
H12C20.3a.1	WBGene00003658	nhr-68	2	20	PAO_14955	1	21	-11.4	CGGUUCUAAUCCUCCGUCA&UGGUGGAGCCAAGGAGGAUCG	(((((((..(.((((((((&))))))))...)..)))))))
ZC155.1.1	WBGene00003588	nex-1	122	144	PAO_14955	1	22	-13.7	UCGAUCUCCAACGCUCAGCGCCA&UGGUGGAGCCAAGGAGGAUCGA	(((((((((...((((..(((((&)))))))))...)).)))))))
F57C12.4.1	WBGene00003408	mrp-2	3703	3719	PAO_14955	5	21	-15.17	UGAUUCUCCUGGACUCU&GGAGCCAAGGAGGAUCG	((((((((((((.((((&))))))).)))))))))
C05D11.11a.1	WBGene00003214	mel-32	200	218	PAO_14955	3	22	-17.97	UGGAUGCUCUUGGCUCGGC&GUGGAGCCAAGGAGGAUCGA	(.(((.((((((((((.((&)).))))))).))).))).)
F58B3.1.1	WBGene00003093	lys-4	82	102	PAO_14955	2	20	-13.05	GUUCUUCGUCUCGGCUUUGCU&GGUGGAGCCAAGGAGGAUC	(.(((((.(...(((((((((&))))))))).).))))).)
W02D3.5.1	WBGene00002258	lbp-6	332	348	PAO_14955	4	19	-13.31	AUCACCCGUUGGCUCGA&UGGAGCCAAGGAGGAU	(((..((.(((((((.(&).)))))))))..)))
F40F4.4a.1	WBGene00002255	lbp-3	372	392	PAO_14955	2	22	-14.26	UCGAUUCUUCAUACAUUUACU&GGUGGAGCCAAGGAGGAUCGA	((((((((((.....((((((&)))))).....))))))))))
C25A1.7.1	WBGene00002153	iars-2	2477	2496	PAO_14955	1	21	-16.37	CAAUCCUUCCGCAUUUAUCA&UGGUGGAGCCAAGGAGGAUCG	(.(((((((.((.(((((((&)))))))))...))))))).)
K02E2.4.1	WBGene00002118	ins-35	42	67	PAO_14955	1	18	-14.69	UCCUCGCAAUAAUCUUGGCGUCGCCA&UGGUGGAGCCAAGGAGGA	((((........(((((((.((((((&)))))).)))))))))))
F57B9.6a.1	WBGene00002083	inf-1	1344	1361	PAO_14955	2	22	-18.58	UCUGUUUUCUCCUCCACC&GGUGGAGCCAAGGAGGAUCGA	((.(((((((.(((((((&)))))))....))))))).))
F37B4.2.1	WBGene00002055	ifc-1	1185	1206	PAO_14955	1	21	-20.42	CGAUCCUCCACCCACGUCGCCA&UGGUGGAGCCAAGGAGGAUCG	(((((((((.....(.((((((&)))))).)....)))))))))
C12C8.1.1	WBGene00002026	hsp-70	1130	1146	PAO_14955	1	17	-15.21	CCUCAACUGCUCCAUUA&UGGUGGAGCCAAGGAGG	((((....(((((((((&)))))))))....))))
Y46H3A.2.1	WBGene00002018	hsp-16.41	134	155	PAO_14955	2	22	-13.77	UUGAUCAUUUCUUGGACGAACU&GGUGGAGCCAAGGAGGAUCGA	((((((.((((((((.(..(((&)))...)))))))))))))))
F38E11.1.1	WBGene00002012	hsp-12.3	383	405	PAO_14955	3	23	-12.38	UUGGAGAAUUCCUUGAGAUCCAC&GUGGAGCCAAGGAGGAUCGAA	((.((...(((((((.(.(((((&))))).))))))))..)).))
E04A4.4a.1	WBGene00001983	hoe-1	1219	1237	PAO_14955	2	23	-20.8	UUCGAUCAAUUGCUCCAUC&GGUGGAGCCAAGGAGGAUCGAA	(((((((..((((((((((&))))))).)))....)))))))
Y50E8A.16.1	WBGene00001817	haf-7	1202	1222	PAO_14955	2	23	-22.97	UUCAUGCUCUUUGGCUCGGCU&GGUGGAGCCAAGGAGGAUCGAA	(((((.(((((((((((.(((&))).))))))))))).)).)))
F43E2.4.1	WBGene00001812	haf-2	953	976	PAO_14955	1	21	-18.34	CGAUCUCUUCUACAGUUUCUACCA&UGGUGGAGCCAAGGAGGAUCG	(((((.(((((...(.((((((((&)))))))).).))))))))))
Y53F4B.33.1	WBGene00001787	gst-39	413	429	PAO_14955	5	20	-10.41	GAUUCUCAAUGGGCUUC&GGAGCCAAGGAGGAUC	(((((((....((((((&))))))...)))))))
C02A12.1.1	WBGene00001781	gst-33	698	710	PAO_14955	7	19	-13.26	AUUUUUUUUGGCU&AGCCAAGGAGGAU	(((((((((((((&)))))))))))))
F11G11.2.1	WBGene00001755	gst-7	553	568	PAO_14955	4	20	-11.63	GAUCUUCUGGCUGCCA&UGGAGCCAAGGAGGAUC	((((((((((((.(((&)))))))..))))))))
C05E4.9a.1	WBGene00001564	icl-1	249	264	PAO_14955	1	16	-22.19	CUCCGAGGCUCCAUCG&UGGUGGAGCCAAGGAG	((((..((((((((((&))))))))))..))))
W08D2.4b.1	WBGene00001395	fat-3	29	49	PAO_14955	2	22	-19.94	UCGAUGGCAAAUGGCUCUACC&GGUGGAGCCAAGGAGGAUCGA	(((((......((((((((((&))))))))))......)))))
K10D2.6.1	WBGene00001262	emb-8	1011	1035	PAO_14955	2	23	-14.02	UUCGAUCCUGAUCACGCAUUCCGUC&GGUGGAGCCAAGGAGGAUCGAA	(((((((((......((..((((((&)))))))).....)))))))))
Y105E8A.4.1	WBGene00001156	ech-7	593	600	PAO_14955	12	19	-9.49	AUUCUCCU&AGGAGGAU	((((((((&))))))))
F56B3.5.1	WBGene00001154	ech-5	28	43	PAO_14955	2	17	-15.49	CCUCCGUGCCUUCGCC&GGUGGAGCCAAGGAGG	(((((.((.(((((((&))))))).)).)))))
F49E8.5.1	WBGene00000996	dif-1	227	246	PAO_14955	2	16	-12.67	CUUGUUGGUGUUUCUCCACU&GGUGGAGCCAAGGAG	(((.((((.....(((((((&))))))))))).)))
C45B11.3.1	WBGene00000981	dhs-18	823	839	PAO_14955	4	20	-13.86	GAUCCUCACUUAUUCCA&UGGAGCCAAGGAGGAUC	(((((((.(((.(((((&)))))..))))))))))
R05D8.8.1	WBGene00000977	dhs-14	86	95	PAO_14955	13	22	-14.76	UCGAUUCUCU&GGAGGAUCGA	((((((((((&))))))))))
C17G10.8.1	WBGene00000970	dhs-6	1156	1172	PAO_14955	2	20	-11.69	GAACAUUUCGCUCCACU&GGUGGAGCCAAGGAGGAUC	((.(.((((((((((((&))))))))...))))).))
F40E10.3.1	WBGene00000822	csq-1	1268	1279	PAO_14955	12	23	-11.93	UUUGAUCUACCU&AGGAGGAUCGAA	((((((((.(((&))).))))))))
W07B8.5.1	WBGene00000785	cpr-5	101	121	PAO_14955	2	19	-13.75	AUUCUUCUCGUGGCUGCUGCC&GGUGGAGCCAAGGAGGAU	((((((((..(((((.(((((&))))))))))))))))))
F44C4.3.1	WBGene00000784	cpr-4	453	474	PAO_14955	2	20	-14.5	GUUCUUUCUUGCUGCUCCAACU&GGUGGAGCCAAGGAGGAUC	(.(((((((((..(((((.(((&))))))))))))))))).)
C52E4.1.1	WBGene00000781	cpr-1	330	339	PAO_14955	14	23	-13.88	UUCGAUUCUC&GAGGAUCGAA	((((((((((&))))))))))
F49D11.8.1	WBGene00000780	cpn-4	286	305	PAO_14955	1	22	-15.63	UCAAUUUUCCACUGCCGCCA&UGGUGGAGCCAAGGAGGAUCGA	((.(((((((.((.((((((&))))))))....))))))).))
F14H8.6b.1	WBGene00000562	cng-1	488	508	PAO_14955	1	23	-22.55	UUCGCAUCUUCUUCUCCAUCA&UGGUGGAGCCAAGGAGGAUCGAA	((((.((((((((((((((((&))))))))...))))))))))))
K01C8.10.1	WBGene00000379	cct-4	1660	1674	PAO_14955	1	17	-19.73	CUUCCUGCUCUACCG&UGGUGGAGCCAAGGAGG	(((((((((((((((&)))))))))..))))))
F08F3.7.1	WBGene00000373	cyp-14A5	1574	1597	PAO_14955	1	23	-19.38	UUUGAUUUUCAGUGCGCUCAUCCA&UGGUGGAGCCAAGGAGGAUCGAA	((((((((((..((.((((..(((&)))..))))))..))))))))))
C34E10.6.1	WBGene00000229	atp-2	1231	1250	PAO_14955	2	22	-28.77	UCGAUCCACUUGACUCCACC&GGUGGAGCCAAGGAGGAUCGA	(((((((.((((.(((((((&))))))).))))..)))))))
F26D10.9a.1	WBGene00000224	atgp-1	578	596	PAO_14955	1	20	-17.12	GAUCUCCCUGUGUCUACCA&UGGUGGAGCCAAGGAGGAUC	(((((((.((..(((((((&)))))))..)).))).))))
ZK455.4.1	WBGene00000212	asm-2	1015	1032	PAO_14955	3	20	-15.56	GGUCCUCAGUGGUUGUAU&GUGGAGCCAAGGAGGAUC	(((((((..(((((.(((&))).)))))..)))))))
K07A12.3.1	WBGene00000209	asg-1	127	136	PAO_14955	2	11	-14.15	UGGCUCCACC&GGUGGAGCCA	((((((((((&))))))))))
F54D8.3a.1	WBGene00000107	alh-1	45	61	PAO_14955	1	17	-19.08	CCUCCGGUGUUCCACCA&UGGUGGAGCCAAGGAGG	(((((...(((((((((&)))))))))...)))))
F12E12.11.1	WBGene00044811	F12E12.11	340	347	PAO_17729	14	21	-14.91	CGAUCCUC&GAGGAUCG	((((((((&))))))))
C01B10.11.1	WBGene00044294	C01B10.11	1001	1022	PAO_17729	2	21	-21.2	CUUUUCUCCUUCCCCCUCCACU&GGUGGAGCCAAGGAGGAUCG	(..((((((((....(((((((&)))))))..))))))))..)
K02E11.10.1	WBGene00044109	K02E11.10	14	38	PAO_17729	3	21	-14.87	UGAUCUUAGCCUGCCUUGUCUCCAC&GUGGAGCCAAGGAGGAUCG	(((((((......(((((.((((((&)))))).))))))))))))
F43C1.7.1	WBGene00023423	F43C1.7	10	30	PAO_17729	1	21	-14.84	CGAUUUUUCUAGGAUUUUCCA&UGGUGGAGCCAAGGAGGAUCG	((((((((((.((.(((.(((&))).))).)).))))))))))
F54D7.7.1	WBGene00023068	rpl-41.2	198	222	PAO_17729	2	22	-18.99	UCGUCUCCUUGUUACCUACUCCAUC&GGUGGAGCCAAGGAGGAUCGA	(((((((((((.......(((((((&))))))).))))))))..)))
ZK697.14.1	WBGene00022809	ZK697.14	538	546	PAO_17729	13	22	-11.15	UCAUUCUCC&GGAGGAUCGA	(((((((((&))))))).))
ZK652.2.1	WBGene00022783	tomm-7	138	157	PAO_17729	1	20	-23	GAUCCUCCCUCUUUCCGCCA&UGGUGGAGCCAAGGAGGAUC	((((((((....((((((((&))))))))....))))))))
ZC97.1a.1	WBGene00022516	mtx-2	120	141	PAO_17729	2	21	-13.45	CGAUUUUGCUGAUUGCCUCGCC&GGUGGAGCCAAGGAGGAUCG	(((((((.((....((.(((((&))))).))..)).)))))))
Y82E9BR.18.1	WBGene00022350	Y82E9BR.18	2509	2538	PAO_17729	1	22	-19.61	UCGAUUCUUACAACACUUACGGCUCAGCCA&UGGUGGAGCCAAGGAGGAUCGA	(((((((((......(((..(((((.((((&)))).)))))))))))))))))
Y73C8C.2.1	WBGene00022261	clec-210	522	543	PAO_17729	1	21	-18.91	UGCUCCUUCUACUUCUUUACCA&UGGUGGAGCCAAGGAGGAUCG	((.(((((((....((((((((&))))))))...))))))).))
Y73C8B.1.1	WBGene00022258	Y73C8B.1	63	82	PAO_17729	1	19	-11.07	AUUUUCCAUCCUACCCGCCA&UGGUGGAGCCAAGGAGGAU	(((((((.......((((((&))))))......)))))))
Y58A7A.5.1	WBGene00021979	Y58A7A.5	873	890	PAO_17729	4	22	-12.54	UCGAUCUUGCUGCCUUCA&UGGAGCCAAGGAGGAUCGA	((((((((.(((.(((((&))))).)).).))))))))
Y54F10AM.5.1	WBGene00021849	Y54F10AM.5	87	107	PAO_17729	1	16	-15.58	CUCCAUGGCUCAAAUCCAUCG&UGGUGGAGCCAAGGAG	((((.((((.....(((((((&))))))))))).))))
Y54E10A.17a.1	WBGene00021835	Y54E10A.17	510	527	PAO_17729	1	17	-16.63	UCUCUUUUGCUCACUCCA&UGGUGGAGCCAAGGAGG	(((((((.((((.(.(((&))).))))).)))))))
Y53G8B.2.1	WBGene00021818	Y53G8B.2	755	767	PAO_17729	3	16	-14.48	CUCACGGCUCCGC&GUGGAGCCAAGGAG	(((..((((((((&))))))))...)))
Y50D4B.2a.1	WBGene00021741	Y50D4B.2	221	241	PAO_17729	1	21	-16.3	UGAUUCUCUGGGGUGCUAUCA&UGGUGGAGCCAAGGAGGAUCG	(((((((((..(((.((((((&)))))).)))..)))))))))
Y49C4A.8a.1	WBGene00021709	ugt-29	969	986	PAO_17729	2	20	-15.43	GACAAUUUUGGCUUCAUC&GGUGGAGCCAAGGAGGAUC	(((..(((((((((((((&)))))))))))))..).))
Y48G8AL.5a.1	WBGene00021686	nsun-2	527	544	PAO_17729	2	17	-17.37	CUUCUUUUGGCUCCAACU&GGUGGAGCCAAGGAGG	(((((((.(((((((.((&))))))))))))))))
Y46H3D.6a.1	WBGene00021610	nhr-237	670	689	PAO_17729	1	17	-14.65	CCAUACUGGAGGCUUCACCA&UGGUGGAGCCAAGGAGG	((...((...((((((((((&)))))))))).))..))
Y22D7AL.10.1	WBGene00021248	Y22D7AL.10	492	510	PAO_17729	2	18	-17.28	UUUUCCUUGAUUUUUCGCC&GGUGGAGCCAAGGAGGA	(((((((((...(((((((&))))))).)))))))))
W10D9.5b.1	WBGene00021133	tomm-22	251	274	PAO_17729	2	22	-11.61	UUGAUCUUUUCCUAGAUUUUCCCC&GGUGGAGCCAAGGAGGAUCGA	(((((((..((((.(...((((((&)).)))).).)))))))))))
W03G1.5.1	WBGene00021011	W03G1.5	613	631	PAO_17729	2	20	-16.1	GAUCUUCCCGAUCUCCAUC&GGUGGAGCCAAGGAGGAUC	((((((((....(((((((&)))))))....))))))))
W02F12.2.1	WBGene00020947	W02F12.2	773	789	PAO_17729	3	22	-16.6	UCGAUCUUCUCGUUCCC&GUGGAGCCAAGGAGGAUCGA	((((((((((.((((((&).)))))...))))))))))
R151.9.1	WBGene00020112	pfd-5	529	548	PAO_17729	2	23	-13.68	UUCGAUUUUAAUACUACACC&GGUGGAGCCAAGGAGGAUCGAA	(((((((((..(.((.((((&)))).))...)..)))))))))
R08F11.3.1	WBGene00019967	cyp-33C8	1494	1512	PAO_17729	3	21	-20.38	CGGUCUUCCAUCGCUCGAC&GUGGAGCCAAGGAGGAUCG	(((((((((.(.((((.((&)).)))).).)))))))))
R02E12.6.1	WBGene00019830	hrg-1	736	758	PAO_17729	1	21	-17.85	CGCUCUUGGCCGCCGCUCCACCA&UGGUGGAGCCAAGGAGGAUCG	((.((((..((...(((((((((&)))))))))...)))))).))
M60.7.1	WBGene00019782	M60.7	1464	1484	PAO_17729	1	21	-19.46	UGUUUUUCUUUGAAUCCAUCA&UGGUGGAGCCAAGGAGGAUCG	((.(((((((((..(((((((&)))))))..))))))))).))
M04F3.4b.1	WBGene00019770	M04F3.4	656	678	PAO_17729	3	22	-16.08	UCUUUCCUCCUCGGAUUCUUCGC&GUGGAGCCAAGGAGGAUCGA	((..(((((((.((...((((((&)))))))).)))))))..))
K11G9.1.1	WBGene00019652	cest-34	1503	1518	PAO_17729	2	22	-14.13	UCGAUCCGGCCCGUCC&GGUGGAGCCAAGGAGGAUCGA	(((((((((((((.((&))))).))).....)))))))
K09F6.10.1	WBGene00019593	K09F6.10	2234	2256	PAO_17729	1	23	-18.61	UUCAUCUUCCUCAUCCUCUUCCA&UGGUGGAGCCAAGGAGGAUCGAA	(((((((((((....((((.(((&))).))))...)))))))).)))
K08D9.4a.1	WBGene00019525	K08D9.4	73	92	PAO_17729	1	19	-13.72	AUUUUCCACGCUACCCGCCA&UGGUGGAGCCAAGGAGGAU	(((((((..(((..((((((&)))))))))...)))))))
K06A5.6.1	WBGene00019433	acdh-3	5	22	PAO_17729	2	19	-19.17	GUCUUCCUUGUCUCGGUC&GGUGGAGCCAAGGAGGAU	((((((((((.(((.(((&))).))).))))))))))
K02F2.2.1	WBGene00019322	ahcy-1	247	271	PAO_17729	2	19	-19.01	GUCUUCCUGCAACAUCUUCUCCACC&GGUGGAGCCAAGGAGGAU	((((((((..........(((((((&)))))))...))))))))
H06H21.6.1	WBGene00019163	ubxn-6	1176	1196	PAO_17729	2	19	-11.16	AUCUGCAUCGUUGGCUCAACU&GGUGGAGCCAAGGAGGAU	((((...((.(((((((.(((&))).))))))).))))))
F59B1.8.1	WBGene00019100	F59B1.8	555	578	PAO_17729	4	23	-11.31	UUUGAAGGCUCUUGCAAGGCUCCA&UGGAGCCAAGGAGGAUCGAA	(((((....((((.(..(((((((&)))))))..).)))))))))
F58F9.7.1	WBGene00019060	acox-3	253	271	PAO_17729	3	21	-12.12	CGAUCUUGAAAACUUCCAU&GUGGAGCCAAGGAGGAUCG	(((((((......((((((&))))))......)))))))
F57B10.3a.1	WBGene00019001	ipgm-1	1372	1390	PAO_17729	1	19	-16.84	GUGCAACUUUGCUCCACCA&UGGUGGAGCCAAGGAGGAU	((.(..(((.(((((((((&))))))))).)))..).))
F56C11.6a.1	WBGene00018958	cest-27	1336	1356	PAO_17729	3	18	-19.3	UCUUCCGUUUUUGGGCUCCAC&GUGGAGCCAAGGAGGA	((((((.......((((((((&))))))))..))))))
F54D11.1.1	WBGene00018811	pmt-2	1471	1490	PAO_17729	1	18	-16.31	UCUUCCUUGCCCAAAAACCA&UGGUGGAGCCAAGGAGGA	((((((((((((....((((&)))))).)).))))))))
F54A5.2a.1	WBGene00018787	cutl-20	1096	1121	PAO_17729	1	23	-19.15	UUCGUCUUCUUCUUCUUCUUCUGCCA&UGGUGGAGCCAAGGAGGAUCGAA	((((..((((((((....((((((((&))))))))..)))))))).))))
F53C3.6a.1	WBGene00018750	F53C3.6	835	861	PAO_17729	1	23	-18.45	UUCGAUCUUUCAACCGGUUUUAAAUCA&UGGUGGAGCCAAGGAGGAUCGAA	(((((((((((....((((((..((((&))))))))))..)))))))))))
F52E4.5.1	WBGene00018702	F52E4.5	721	733	PAO_17729	1	19	-9.78	GUUCUCUUCCCCA&UGGUGGAGCCAAGGAGGAU	(((((((((((((&))).))).....)))))))
F44E7.8a.1	WBGene00018430	nhr-142	645	653	PAO_17729	1	9	-15.46	GCUCCACCA&UGGUGGAGC	(((((((((&)))))))))
F44C8.1.1	WBGene00018413	cyp-33C4	1227	1243	PAO_17729	1	19	-9.49	AUCUUCCCAGACCCCUA&UGGUGGAGCCAAGGAGGAU	(((((((..(.((((((&))).)).).)..)))))))
F41G3.10.1	WBGene00018303	F41G3.10	396	416	PAO_17729	1	22	-9.74	UCGAUUUGACAAACCCAACCA&UGGUGGAGCCAAGGAGGAUCGA	(((((((..(...(((.((((&)))))).)....)..)))))))
F41C3.5.1	WBGene00018271	ctsa-1.1	217	235	PAO_17729	2	20	-11.75	GCUCUUCCUUGGACGGACU&GGUGGAGCCAAGGAGGAUC	(.((((((((((.(..(((&)))...))))))))))).)
F41B5.4.1	WBGene00018262	cyp-33C3	201	223	PAO_17729	1	20	-19.4	GAUCCUUUUAUUGGUUUUCACCG&UGGUGGAGCCAAGGAGGAUC	((((((((..(((((.(((((((&))))))))))))))))))))
F28C10.3.1	WBGene00017898	F28C10.3	327	345	PAO_17729	3	20	-18.79	GAUCCUCACCACAAUCCAC&GUGGAGCCAAGGAGGAUC	(((((((.......(((((&)))))......)))))))
F28A12.4.1	WBGene00017881	asp-13	785	800	PAO_17729	6	20	-18.09	GAUUUUCUCUUGGCUC&GAGCCAAGGAGGAUC	(((((((.((((((((&)))))))))))))))
F28A10.6.1	WBGene00017874	acdh-9	1332	1340	PAO_17729	12	20	-12.75	GAUUUUCCU&AGGAGGAUC	(((((((((&)))))))))
F22A3.6c.1	WBGene00017691	ilys-5	67	89	PAO_17729	2	21	-15.97	CGUUUCCGCCGACUGCCUCCACU&GGUGGAGCCAAGGAGGAUCG	((..(((.((...((.(((((((&))))))).)).)).))).))
F21F8.11.1	WBGene00017681	slc-17.5	873	891	PAO_17729	1	18	-17.58	UCCUCCAAAACAUCCAUCA&UGGUGGAGCCAAGGAGGA	((((((......(((((((&))))))).....))))))
F18E3.11.1	WBGene00017567	F18E3.11	111	129	PAO_17729	1	18	-15.82	UUCUGCUUCGUCUUCAUCA&UGGUGGAGCCAAGGAGGA	((((.(((.(.((((((((&))))))))).))).))))
F16B4.9.1	WBGene00017510	nhr-178	411	430	PAO_17729	1	20	-15.98	GACCUACCUUCACUUCAUCA&UGGUGGAGCCAAGGAGGAUC	(((((.((((..((((((((&))))))))..))))))).))
F15E6.6.1	WBGene00017487	F15E6.6	977	990	PAO_17729	3	19	-18.39	AUUCUCCUCUCCAC&GUGGAGCCAAGGAGGAU	((((((((((((((&))))))...))))))))
F14F9.4.1	WBGene00017467	F14F9.4	24	43	PAO_17729	2	22	-20.6	UCGUCUUCUUUGGAACCAUC&GGUGGAGCCAAGGAGGAUCGA	(((((((((((((..(((((&)))))..)))))))))).)))
F13C5.1.1	WBGene00017422	F13C5.1	750	769	PAO_17729	1	22	-19.73	UCAUCCUCCUCAUCUACACA&UGGUGGAGCCAAGGAGGAUCGA	((((((((((..(((((.((&)))))))....)))))))).))
F10E7.8a.1	WBGene00017349	farl-11	1416	1436	PAO_17729	1	20	-23.78	GAUUCUCCAGGCGCUUCAUCA&UGGUGGAGCCAAGGAGGAUC	((((((((..(.(((((((((&))))))))))..))))))))
F09F7.8.1	WBGene00017305	nspb-12	112	131	PAO_17729	2	22	-17.62	UCGGCCGCCUAUGUUCCAUC&GGUGGAGCCAAGGAGGAUCGA	((((((.(((..((((((((&))))))))..))).)).))))
F09E5.3.1	WBGene00017283	F09E5.3	858	874	PAO_17729	3	19	-20.46	AUCCUCACUUGUUCCGC&GUGGAGCCAAGGAGGAU	((((((.((((((((((&))))))).)))))))))
F07F6.8.1	WBGene00017220	F07F6.8	982	1005	PAO_17729	1	23	-18.28	UUUGAAUUUUUCUGGGUUUCACUA&UGGUGGAGCCAAGGAGGAUCGAA	(((((.(((((((.((((((((((&)))))))))).))))))))))))
DC2.5a.1	WBGene00017082	DC2.5	656	675	PAO_17729	1	23	-20.66	UUCGAUCGUCAGCUCCAUCA&UGGUGGAGCCAAGGAGGAUCGAA	(((((((.((.(((((((((&)))))))))....)).)))))))
D2096.8.1	WBGene00017075	nap-1	801	817	PAO_17729	1	16	-16.03	UUCCUUGAGCUCGACUA&UGGUGGAGCCAAGGAG	(((((((.((((.((((&)))).)))))))))))
D2063.1.1	WBGene00017060	D2063.1	14	36	PAO_17729	2	19	-12.85	AUCUUCUCAACAAUGGUUUCAUC&GGUGGAGCCAAGGAGGAU	(((((((......((((((((((&)))))))))).)))))))
CD4.7b.1	WBGene00016992	zhit-1	514	520	PAO_17729	11	17	-9.99	CCUCCUU&AAGGAGG	(((((((&)))))))
C54G7.2.1	WBGene00016934	mboa-3	775	798	PAO_17729	2	23	-12.8	UUCCAUUCUUCCAGUGGUUCUUCU&GGUGGAGCCAAGGAGGAUCGAA	(((.(((((((...(((((((.((&)).))))))).))))))).)))
C49G7.3.1	WBGene00016781	C49G7.3	59	80	PAO_17729	3	22	-21.37	UUGAUUGCUUUUCUGGCUCCAC&GUGGAGCCAAGGAGGAUCGA	((((((.(((((.(((((((((&))))))))))))))))))))
C49A9.8.1	WBGene00016762	ugt-24	1060	1081	PAO_17729	3	23	-21.34	UUCAUUUCUUCUUGGCUGCCAC&GUGGAGCCAAGGAGGAUCGAA	(((..((((((((((((.((((&))))))))))))))))..)))
C44B7.10.1	WBGene00016630	acer-1	388	414	PAO_17729	2	23	-14.93	UUCAUGCUUCUUGUACGAAGUUCCACU&GGUGGAGCCAAGGAGGAUCGAA	(((((.(((((((......((((((((&))))))))))))))).)).)))
C37H5.3a.1	WBGene00016507	abhd-5.2	783	799	PAO_17729	4	21	-19.05	CGAUCCUUGGGGCUUCA&UGGAGCCAAGGAGGAUCG	((((((((..(((((((&)))))))...))))))))
C35B1.2a.1	WBGene00016432	C35B1.2	981	989	PAO_17729	13	21	-15.05	CGAUCCUCU&GGAGGAUCG	(((((((((&)))))))))
C29F5.1.1	WBGene00016210	C29F5.1	798	818	PAO_17729	1	20	-12.33	GAUAAAUCUGAAGUUCUGCCA&UGGUGGAGCCAAGGAGGAUC	(((...(((...(((((((((&)))))))))...)))..)))
C23H5.8b.1	WBGene00016027	C23H5.8	565	582	PAO_17729	2	18	-13.53	UCCUACUGUAUCUCUACC&GGUGGAGCCAAGGAGGA	((((.((....(((((((&)))))))....))))))
C17C3.1b.1	WBGene00015887	C17C3.1	11	40	PAO_17729	1	23	-17.58	UUCGAUACUCUUUUCCUUGUUUUCUCAUCA&UGGUGGAGCCAAGGAGGAUCGAA	(((((.....(((((((((..(((.(((((&)))))))).))))))))))))))
C15B12.8.1	WBGene00015788	C15B12.8	878	898	PAO_17729	1	21	-16.19	CGAUCCCAGGAAGCUUUAUCA&UGGUGGAGCCAAGGAGGAUCG	(((((((.....(((((((((&)))))))))....).))))))
C12D5.7.1	WBGene00015709	cyp-33A1	306	323	PAO_17729	1	18	-23.09	UUCUCCUAUCCUCCACCA&UGGUGGAGCCAAGGAGGA	(((((((...((((((((&))))))))...)))))))
C10H11.4.1	WBGene00015693	ugt-28	801	823	PAO_17729	1	23	-17.53	UUCAAUUUUCUUUGUCAACGCCA&UGGUGGAGCCAAGGAGGAUCGAA	(((.((((((((((.(..(((((&)))))..).)))))))))).)))
C07G3.2.1	WBGene00015574	irg-1	96	107	PAO_17729	4	17	-11.51	CCUCCGGCUUUG&UGGAGCCAAGGAGG	((((((((((((&)))))))..)))))
C07D10.2a.1	WBGene00015567	bath-44	1386	1414	PAO_17729	2	23	-18.42	UUCGACCUCUUUUUCAUUUUCUGCCCAUC&GGUGGAGCCAAGGAGGAUCGAA	((((((((((((..........(((((((&))))).)).))))))).)))))
C06E7.1a.1	WBGene00015538	sams-3	120	137	PAO_17729	6	22	-14.97	UUGAUGCUCAUUUGGCUC&GAGCCAAGGAGGAUCGA	(((((.(((.((((((((&))))))))))).)))))
C06A8.1b.1	WBGene00015512	mthf-1	134	149	PAO_17729	3	22	-15.83	UCGAUUCUCUGUCCAC&GUGGAGCCAAGGAGGAUCGA	((((((((((((((((&))))).)...))))))))))
C01B12.3.1	WBGene00015286	best-3	1895	1912	PAO_17729	2	20	-10.69	GAUCCCUUUCAUUUCAUU&GGUGGAGCCAAGGAGGAUC	(((((((((..(((((((&)))))))..)))).)))))
B0361.8.1	WBGene00015162	algn-11	469	491	PAO_17729	1	22	-14.09	UCGAUUCAAUGGGAUAUCCACUA&UGGUGGAGCCAAGGAGGAUCGA	(((((((....((...(((((((&))))))).)).....)))))))
B0205.6.1	WBGene00015021	nfs-1	1012	1027	PAO_17729	4	17	-16.58	CCUUCUGAUGGCUCUA&UGGAGCCAAGGAGG	((((((..((((((((&))))))))))))))
K08E5.1b.1	WBGene00014801	K08E5.1	648	654	PAO_17729	13	19	-8.95	GUCCUUC&GGAGGAU	(((((((&)))))))
ZK1320.4.1	WBGene00014254	cyp-13A10	1149	1168	PAO_17729	2	23	-16	UUCGAUACAACUGCUCUAUC&GGUGGAGCCAAGGAGGAUCGAA	((((((.(..((((((((((&))))))))..))..).))))))
ZK896.5.1	WBGene00014136	ZK896.5	1103	1120	PAO_17729	1	20	-21.18	GAUUCUUCUCCUCCGCCA&UGGUGGAGCCAAGGAGGAUC	(((((((((.((((((((&))))))))...)))))))))
ZK822.5a.1	WBGene00014092	ZK822.5	539	562	PAO_17729	3	23	-21.74	UUUGGUUUUAAUCUUUGGCUGCAC&GUGGAGCCAAGGAGGAUCGAA	((((((((...(((((((((.(((&))).)))))))))))))))))
ZK632.3.1	WBGene00014012	riok-3	1628	1653	PAO_17729	2	23	-14.33	UUUUUUGCUCCUUUGGUUUGUUUACU&GGUGGAGCCAAGGAGGAUCGAA	(((..(.((((.(((((((...((((&))))))))))))))).)..)))
ZK617.2.1	WBGene00014009	lips-6	706	727	PAO_17729	1	20	-16.57	GCAUUCAACUUGGCAUCCACUG&UGGUGGAGCCAAGGAGGAUC	(.((((..((((((.(((((((&)))))))))))))..)))))
ZC376.7a.1	WBGene00013878	atfs-1	1683	1705	PAO_17729	1	23	-15.53	UUCGAUCCCAAAUUUCCCAUCCA&UGGUGGAGCCAAGGAGGAUCGAA	(((((((((.......(((.(((&)))))).......).))))))))
Y73F4A.2.1	WBGene00013515	Y73F4A.2	69	92	PAO_17729	1	23	-15.37	UUCUUUUUGCCUUUGCAUCCGCCA&UGGUGGAGCCAAGGAGGAUCGAA	(((..(((.((((.((.(((((((&))))))))).)))).)))..)))
Y60A3A.7.1	WBGene00013358	abhd-3.1	1113	1123	PAO_17729	13	23	-15.23	UUUGAUCUUCC&GGAGGAUCGAA	(((((((((((&)))))))))))
Y57G11C.34.1	WBGene00013324	mrps-7	714	735	PAO_17729	1	22	-13.82	UCGUUUCUCUUUUGUUUUGUUA&UGGUGGAGCCAAGGAGGAUCGA	(((.((((((((.(((((((((&))))))))).)))))))).)))
Y57A10C.6.1	WBGene00013284	daf-22	576	596	PAO_17729	1	19	-10.59	AUCCAAAAUCCCAGUUCACCA&UGGUGGAGCCAAGGAGGAU	((((....(((...(((((((&))))))).....)))))))
Y51A2D.9b.1	WBGene00013077	ttr-24	19	35	PAO_17729	2	22	-11.82	UCGAUUCCCGGUCGACU&GGUGGAGCCAAGGAGGAUCGA	(((((((((((((.(((&))).)).))..)).)))))))
Y46G5A.18a.1	WBGene00012908	Y46G5A.18	543	561	PAO_17729	3	21	-16.08	CGACUUCAUCCGGCUCCGC&GUGGAGCCAAGGAGGAUCG	(((.(((.(((((((((((&))))))))..)))))))))
Y38F1A.6.1	WBGene00012608	hphd-1	963	989	PAO_17729	2	23	-15.19	UUCGUCCACUUUAUCAAGGUUCCAACC&GGUGGAGCCAAGGAGGAUCGAA	(((((((.((((.....(((((((.((&))))))))))))).))).))))
W09H1.5.1	WBGene00012375	mecr-1	424	437	PAO_17729	1	16	-18.18	CUCGGGCUCCACCA&UGGUGGAGCCAAGGAG	(((.((((((((((&))))))))))...)))
R107.5a.1	WBGene00011300	R107.5	709	725	PAO_17729	1	16	-18.73	CUCCAAUGGCUUCGCCA&UGGUGGAGCCAAGGAG	((((..(((((((((((&))))))))))).))))
R53.4.1	WBGene00011273	R53.4	396	427	PAO_17729	1	22	-21.17	UCGUUCCUCAAUUGGCUCGUCAAGUCUCACCG&UGGUGGAGCCAAGGAGGAUCGA	(((.(((((..(((((((.........(((((&)))))))))))).))))).)))
R11A5.4a.1	WBGene00011232	pck-2	108	139	PAO_17729	1	23	-17.49	UUCGUCUCUUCUUUCCGUGUGCUCUUAAACCA&UGGUGGAGCCAAGGAGGAUCGAA	((((..(((((((....((.(((((...((((&)))))))))))))))))).))))
R07E5.2.1	WBGene00011110	prdx-3	205	225	PAO_17729	2	23	-19.15	UUCUAUCCACUUGACUUCACC&GGUGGAGCCAAGGAGGAUCGAA	(((.((((.((((.(((((((&))))))).))))..)))).)))
R07E3.1a.1	WBGene00011102	R07E3.1	871	898	PAO_17729	1	22	-20.85	UCGAUCUUCCAUAUGUAGCUCAUCGCCA&UGGUGGAGCCAAGGAGGAUCGA	((((((((((...((..((((..(((((&))))))))))).))))))))))
R04B5.6.1	WBGene00011004	R04B5.6	340	360	PAO_17729	1	21	-13.49	CGUUUUUUCGCUACUCCACCA&UGGUGGAGCCAAGGAGGAUCG	((.((((((....((((((((&))))))))....)))))).))
R03D7.1.1	WBGene00010988	metr-1	699	715	PAO_17729	1	17	-17.34	UUUCCUUGUGUCCACCA&UGGUGGAGCCAAGGAGG	((((((((..(((((((&)))))))..))))))))
M88.1.1	WBGene00010904	ugt-62	782	791	PAO_17729	12	21	-13.97	CGAUCUUCCU&AGGAGGAUCG	((((((((((&))))))))))
M05D6.6.2	WBGene00010879	taap-1	46	67	PAO_17729	1	19	-18.03	AUCUUCCUUUAGGUUCUUGCUA&UGGUGGAGCCAAGGAGGAU	(((((((((..(((((.(((((&)))))))))))))))))))
K12G11.3.1	WBGene00010790	sodh-1	869	878	PAO_17729	13	22	-15.81	UCGGUCUUCC&GGAGGAUCGA	((((((((((&))))))))))
K09A9.1.1	WBGene00010700	nipi-3	1113	1131	PAO_17729	4	21	-14.63	CGUUCCAUUCAUGGCUCCG&UGGAGCCAAGGAGGAUCG	((.(((.(((.((((((((&)))))))).)))))).))
K07C5.4.1	WBGene00010627	nol-56	619	640	PAO_17729	1	18	-14.78	UCUUCCGUCUGGCUCCAGAUCA&UGGUGGAGCCAAGGAGGA	((((((...((((((((..(((&))))))))))).))))))
K02A11.3.1	WBGene00010488	endu-1	470	485	PAO_17729	3	17	-10.34	CAACUUUGGUUUUCAC&GUGGAGCCAAGGAGG	(..((((((((.((((&))))))))))))..)
K01D12.10.1	WBGene00010469	K01D12.10	64	72	PAO_17729	1	9	-13.24	GCUCCAUCA&UGGUGGAGC	(((((((((&)))))))))
F59A2.3.1	WBGene00010303	cri-3	559	575	PAO_17729	3	22	-15.54	UCGAUCCAGACCUCCAC&GUGGAGCCAAGGAGGAUCGA	(((((((...(((((((&))))))....)..)))))))
F54D5.12.1	WBGene00010055	F54D5.12	566	579	PAO_17729	6	19	-15.07	AUCUUCUCGGGCUC&GAGCCAAGGAGGAU	(((((((..(((((&)))))..)))))))
F53F4.10.1	WBGene00009992	F53F4.10	213	230	PAO_17729	2	21	-11.27	UGGUGCUCUUAUUCCACU&GGUGGAGCCAAGGAGGAUCG	((((.(((((.(((((((&)))))))...))))).))))
F53A2.7.1	WBGene00009952	acaa-2	1290	1300	PAO_17729	13	23	-11.43	UUCCAUCUUCC&GGAGGAUCGAA	(((.(((((((&))))))).)))
F49E12.9a.1	WBGene00009902	drd-1	794	814	PAO_17729	1	21	-15.96	CGGUUCUUUUAGGUCCAACUA&UGGUGGAGCCAAGGAGGAUCG	((((((((((.(((((.((((&))))))).)).))))))))))
F44G3.2.1	WBGene00009706	argk-1	911	923	PAO_17729	2	14	-14.72	CCUUGGUUCAACU&GGUGGAGCCAAGG	(((((((((.(((&))).)))))))))
F44A6.5.1	WBGene00009677	F44A6.5	623	640	PAO_17729	1	19	-17.43	AUCCUGCUGCCUCCGCUG&UGGUGGAGCCAAGGAGGAU	(((((.(((.((((((((&)))))))).).)).)))))
F32D8.12a.1	WBGene00009334	F32D8.12	1183	1189	PAO_17729	13	19	-11.64	AUCCUCC&GGAGGAU	(((((((&)))))))
F28F8.2.1	WBGene00009221	acs-2	599	625	PAO_17729	1	19	-15.41	AUCCCAUGACAUCCCAGAGCUCCGCCA&UGGUGGAGCCAAGGAGGAU	((((.......(((..(.(((((((((&))))))))))..)))))))
F27D4.1.1	WBGene00009187	F27D4.1	268	292	PAO_17729	2	19	-13.27	AUCUUCCAGAACGAGUGGCUCCAGU&GGUGGAGCCAAGGAGGAU	(((((((........((((((((.(&).)))))))).)))))))
F22B5.4.1	WBGene00009042	F22B5.4	256	274	PAO_17729	1	19	-13.24	AUCAAUUCCUUGUCCGCCG&UGGUGGAGCCAAGGAGGAU	(((..((((((((((((((&)))))))..))))))))))
F14F7.3.1	WBGene00008810	cyp-13A12	1098	1115	PAO_17729	2	18	-18.86	UCCUCCUGGCAACUCACC&GGUGGAGCCAAGGAGGA	((((((((((...(((((&))))).))).)))))))
F11C1.5a.1	WBGene00008694	vwa-8	1257	1281	PAO_17729	3	22	-16.32	UCGAGAAUCCUUGGCGAACUUUCAC&GUGGAGCCAAGGAGGAUCGA	((((...((((((((.....(((((&)))))))))))))...))))
F09F3.6.1	WBGene00008628	ttr-21	240	255	PAO_17729	1	19	-18.46	AUGCUCCUCUCCAUCA&UGGUGGAGCCAAGGAGGAU	((.(((((((((((((&))))))))...))))).))
F09B12.3.1	WBGene00008607	F09B12.3	602	616	PAO_17729	2	17	-16.74	CCUACGAGCUUCACC&GGUGGAGCCAAGGAGG	(((.(..((((((((&))))))))...).)))
F08H9.6.1	WBGene00008594	clec-57	1203	1234	PAO_17729	1	23	-14.21	UUCAAUCUUCCAACUUGAUCUUAAUACCACCA&UGGUGGAGCCAAGGAGGAUCGAA	(((.(((((((...(((..((.....((((((&)))))))).)))))))))).)))
F08A8.3.1	WBGene00008566	acox-1.3	1854	1871	PAO_17729	2	20	-15.27	GAUCUGUUCUUGGCCGCC&GGUGGAGCCAAGGAGGAUC	(((((.((((((((((((&))))..)))))))))))))
F02A9.4.1	WBGene00008514	mrpl-44	1553	1572	PAO_17729	5	22	-20.27	UUUGUCCUCCCAUCGGCUCC&GGAGCCAAGGAGGAUCGA	((.(((((((....((((((&))))))..))))))).))
E03H4.7.1	WBGene00008475	oac-13	771	790	PAO_17729	2	21	-19.5	CUUUCCUCUGAAGCUUCAUC&GGUGGAGCCAAGGAGGAUCG	(..((((((...((((((((&))))))))...))))))..)
DH11.2.1	WBGene00008436	DH11.2	825	847	PAO_17729	1	22	-13.03	UCGAUAAACGAAAAGCUUCACCG&UGGUGGAGCCAAGGAGGAUCGA	(((((...(.....(((((((((&)))))))))...)....)))))
D1025.4.1	WBGene00008356	nspc-20	46	69	PAO_17729	2	23	-14.26	UUCGCAUCCUUGCUGCUCUCUGCU&GGUGGAGCCAAGGAGGAUCGAA	((((.((((((.((...(((((((&)))))))...))))))))))))
C55A6.5.1	WBGene00008334	sdz-8	464	485	PAO_17729	1	22	-21.91	UCAUCUGGACUUGGUUCCAUCA&UGGUGGAGCCAAGGAGGAUCGA	((((((...(((((((((((((&)))))))))))))..)))).))
C54D10.1.1	WBGene00008296	cdr-2	360	374	PAO_17729	1	19	-12.48	AUCCCAUCUCUACCA&UGGUGGAGCCAAGGAGGAU	(((((..((((((((&)))))))).....).))))
C52G5.2.1	WBGene00008260	C52G5.2	375	395	PAO_17729	1	22	-12.89	UUGAUCCAGUUGGAAACGCCA&UGGUGGAGCCAAGGAGGAUCGA	(((((((..((((...(((((&)))))...))))...)))))))
C47E12.4a.1	WBGene00008149	pyp-1	1334	1353	PAO_17729	1	18	-19.08	UUCUUUUUGGUUUACCACCA&UGGUGGAGCCAAGGAGGA	((((((((((((..((((((&))))))))))))))))))
C37A5.1.1	WBGene00007988	best-8	1286	1298	PAO_17729	3	15	-17.83	UCCAUGGCUCCAC&GUGGAGCCAAGGA	(((.(((((((((&))))))))).)))
C36A4.9b.1	WBGene00007969	acs-19	79	101	PAO_17729	2	23	-20.35	UUCAGAUUUUCCUCCCUCCAGCC&GGUGGAGCCAAGGAGGAUCGAA	(((.(((((((((..(((((.((&)))))))...))))))))))))
C34C12.8.1	WBGene00007927	C34C12.8	726	745	PAO_17729	5	23	-14.02	UUUAAUUUUCCUCUGGUUUU&GGAGCCAAGGAGGAUCGAA	(((.((((((((.(((((((&))))))))))))))).)))
C33A12.3a.1	WBGene00007882	C33A12.3	239	261	PAO_17729	1	22	-18.65	UCGAUCCACCAGGAAUAACACCA&UGGUGGAGCCAAGGAGGAUCGA	(((((((.((.((.....(((((&)))))...))..)).)))))))
C31E10.7.1	WBGene00007848	cytb-5.1	353	373	PAO_17729	2	23	-15.48	UUCGCCCUUCUUGCUGUCAUU&GGUGGAGCCAAGGAGGAUCGAA	((((.((((((((((.(((((&)))))))).)))))))..))))
C30H6.7a.1	WBGene00007824	dlat-2	922	942	PAO_17729	2	21	-17.9	CGAUUCCUUCUUCACUUCUCC&GGUGGAGCCAAGGAGGAUCG	((((.(((((((..((((.((&)).))))..)))))))))))
C29F7.2a.1	WBGene00007811	C29F7.2	772	787	PAO_17729	3	20	-13.72	GAUCUUUGGGCCCCAC&GUGGAGCCAAGGAGGAUC	(((((((.(((.((((&)))).)))...)))))))
C27A7.5d.1	WBGene00007756	C27A7.5	77	95	PAO_17729	2	21	-18.07	CCAUUCUUUUGGCCCCGCC&GGUGGAGCCAAGGAGGAUCG	(.(((((((((((.(((((&))))).)))).))))))).)
C15C8.3a.1	WBGene00007605	hrg-7	580	600	PAO_17729	1	22	-14.2	UUGAUACUUUCUGUUUCACUA&UGGUGGAGCCAAGGAGGAUCGA	(((((.(((((((((((((((&)))))))))..)))))))))))
C14C10.3a.1	WBGene00007586	ril-2	1335	1354	PAO_17729	4	22	-15.94	UCUAUUUUCUCUGUGCUCUA&UGGAGCCAAGGAGGAUCGA	((.(((((((.((.((((((&)))))))).))))))).))
C14B1.3.1	WBGene00007574	C14B1.3	15	37	PAO_17729	2	23	-12.85	UUCCAUUCUCUGCGUCUCUCUCC&GGUGGAGCCAAGGAGGAUCGAA	(((.(((((((..(.((((..((&)).)))).)..))))))).)))
C14A4.14.1	WBGene00007564	mrps-22	533	558	PAO_17729	1	21	-15.77	CGAAUCGUUCUGUGAAUCCUCCACCA&UGGUGGAGCCAAGGAGGAUCG	(((.((.((((.((....((((((((&)))))))).)))))).)))))
C06H2.1.1	WBGene00007385	atp-5	615	641	PAO_17729	1	22	-20.56	UCGUUCUUCCUUAUCGCUCUCCUACCA&UGGUGGAGCCAAGGAGGAUCGA	(((.((((((((...(((((...((((&))))))))).)))))))).)))
C05C10.4.1	WBGene00007331	pho-11	418	438	PAO_17729	2	22	-15.88	UCCCCACUCACUUGGUUCCCU&GGUGGAGCCAAGGAGGAUCGA	((....(((.(((((((((((&)).))))))))))))....))
C01A2.4.1	WBGene00007216	C01A2.4	460	476	PAO_17729	5	22	-12.5	UCGAUUCUCGACGCACC&GGAGCCAAGGAGGAUCGA	(((((((((...((.((&)).))....)))))))))
B0564.1a.1	WBGene00007201	exos-4.1	509	521	PAO_17729	5	17	-17.31	CUUCUUUGGCUCU&GGAGCCAAGGAGG	(((((((((((((&)))))))))))))
B0457.6.1	WBGene00007180	B0457.6	426	446	PAO_17729	1	20	-23.65	GACUUCCUUGGUCUUCCACCA&UGGUGGAGCCAAGGAGGAUC	((((((((((((..(((((((&))))))))))))))))).))
B0399.2.1	WBGene00007177	oac-1	879	897	PAO_17729	2	20	-21.88	GAUGCUGUUUGGCUCCGCC&GGUGGAGCCAAGGAGGAUC	(((.((.((((((((((((&)))))))))))).)).)))
B0285.4.1	WBGene00007137	lcmt-1	739	760	PAO_17729	1	21	-17.81	CGAACUUCUGAUGCAUUCACCA&UGGUGGAGCCAAGGAGGAUCG	(((.(((((...((.(((((((&)))))))))...))))).)))
B0272.3.1	WBGene00007129	B0272.3	429	443	PAO_17729	2	16	-14.49	CUUCUUCACUUCGCC&GGUGGAGCCAAGGAG	((((((..(((((((&)))))))..))))))
C16A3.7.1	WBGene00007048	nfx-1	319	342	PAO_17729	1	23	-25.06	UUCGAUCCAUCUGUGCCUCCACCG&UGGUGGAGCCAAGGAGGAUCGAA	((((((((.(((.((.((((((((&)))))))).)).)))))))))))
W01A8.1b.1	WBGene00007024	plin-1	1299	1318	PAO_17729	2	23	-24.81	UUCCCCUCCUUCGCACCACC&GGUGGAGCCAAGGAGGAUCGAA	(((.(((((((.((.(((((&))))).)).)))))))...)))
K07E3.8.1	WBGene00006890	vem-1	116	130	PAO_17729	1	16	-19.53	CUCCCAGCUCCACCA&UGGUGGAGCCAAGGAG	((((..(((((((((&)))))))))...))))
C01G6.6a.1	WBGene00006510	mtrr-1	276	296	PAO_17729	1	21	-14.88	CGUUCUUCUCGGUCUCGGCGA&UGGUGGAGCCAAGGAGGAUCG	(((((((((.((.(((.((.(&).)).))))).))))))).))
E02H1.3.1	WBGene00006473	tag-124	875	883	PAO_17729	13	21	-15.93	CGAUCCUUC&GGAGGAUCG	(((((((((&)))))))))
C31C9.1a.1	WBGene00006404	tag-10	798	813	PAO_17729	5	20	-13.74	GAUCCUUCUUCACUCC&GGAGCCAAGGAGGAUC	((((((((((..((((&))))..))))))))))
K11D12.3a.1	WBGene00005655	srr-4	830	851	PAO_17729	1	21	-15.95	CUUUUCUGCUUCUUCUCCAUCA&UGGUGGAGCCAAGGAGGAUCG	(..((((.(((...((((((((&))))))))..))).))))..)
C27B7.1b.1	WBGene00005007	spr-2	1027	1057	PAO_17729	2	22	-13.16	UCGAUCCCGUUUUUGUAAGUAUUUAUUCACU&GGUGGAGCCAAGGAGGAUCGA	(((((((..((((((..........((((((&))))))..)))))))))))))
C54G6.5.1	WBGene00005002	spp-17	27	46	PAO_17729	2	22	-17.45	UCGUCCUUCUGCUCGUCGCC&GGUGGAGCCAAGGAGGAUCGA	((((((((((((((..((((&))))))))..))))))).)))
C28C12.7a.1	WBGene00004995	spp-10	594	611	PAO_17729	3	21	-14.62	CCAUUCUCCAAGAUCCAC&GUGGAGCCAAGGAGGAUCG	(.(((((((....(((((&))))).....))))))).)
Y71F9B.4.1	WBGene00004920	snr-7	92	112	PAO_17729	1	19	-17.1	AUCCUCCGCGGUUUCGAUCCA&UGGUGGAGCCAAGGAGGAU	(((((((..(((((((..(((&))))))))))..)))))))
F56E10.4.1	WBGene00004496	rps-27	164	182	PAO_17729	1	19	-15.94	GUCUUCUCGCACGCCACCA&UGGUGGAGCCAAGGAGGAU	(((((((.((...((((((&)))))).))...)))))))
C27A2.2a.1	WBGene00004434	rpl-22	297	314	PAO_17729	4	17	-14.16	CCUCCGUGAUUGGCUCCG&UGGAGCCAAGGAGG	(((((....(((((((((&))))))))))))))
C12D8.11.1	WBGene00004405	rop-1	1428	1444	PAO_17729	5	21	-20.81	CGAUACUGCUUGGCUCU&GGAGCCAAGGAGGAUCG	((((.((.(((((((((&))))))))).)).))))
D2023.2a.1	WBGene00004258	pyc-1	17	37	PAO_17729	1	21	-18.45	CGGUUCUCCCGCAUCCCACCG&UGGUGGAGCCAAGGAGGAUCG	(((((((((.((...((((((&)))))).))...)))))))))
Y37E3.9.1	WBGene00004014	phb-1	313	332	PAO_17729	2	22	-16.85	UCGUCUUCCAAACAUCUACC&GGUGGAGCCAAGGAGGAUCGA	(((((((((.....((((((&)))))).....))))))).))
F22E10.3.1	WBGene00004008	pgp-14	421	439	PAO_17729	1	17	-20.57	CCUUCUUGUCUAUCCACCA&UGGUGGAGCCAAGGAGG	((((((((....(((((((&)))))))..))))))))
C47A10.1.1	WBGene00004003	pgp-9	2936	2957	PAO_17729	2	23	-18.09	UUCAUUCUCCUUUGGUACUAUU&GGUGGAGCCAAGGAGGAUCGAA	((((((((((((.(((.(((((&))))).)))))))))))).)))
C05A9.1b.1	WBGene00003999	pgp-5	22	41	PAO_17729	3	22	-19.84	UUUUUCCUUGUUGGCUUUGC&GUGGAGCCAAGGAGGAUCGA	((..(((((.((((((((((&)))))))))).)))))..))
F42E11.1a.1	WBGene00003998	pgp-4	2393	2413	PAO_17729	2	23	-19.47	UUCGUUCUUCUGGCUGUUACC&GGUGGAGCCAAGGAGGAUCGAA	(((((((((((((((.(((((&))))))))).))))))).))))
K08E7.9.1	WBGene00003995	pgp-1	2527	2546	PAO_17729	1	23	-14.08	UUGGAUUCUUCGAUUCACCA&UGGUGGAGCCAAGGAGGAUCGAA	((.((((((((..(((((((&))))))).....)))))))).))
F54C1.7.1	WBGene00003934	pat-10	33	39	PAO_17729	2	8	-9.62	CUCCGCC&GGUGGAG	(((((((&)))))))
M117.2a.2	WBGene00003920	par-5	890	909	PAO_17729	4	23	-17.06	UUCGGUCUUCAAGUGCUCUA&UGGAGCCAAGGAGGAUCGAA	((((((((((....((((((&))))))....))))))))))
C52B9.7a.1	WBGene00003907	paf-2	247	264	PAO_17729	1	19	-15.37	AUCCAUUAUGGCUUCCUA&UGGUGGAGCCAAGGAGGAU	((((.((.((((((((((&))).))))))).)).))))
K11C4.4.1	WBGene00003844	odc-1	726	746	PAO_17729	2	20	-17.71	GAUCCUCCGCAUUGCUGUAUC&GGUGGAGCCAAGGAGGAUC	((((((((.....(((.((((&)))).)))...))))))))
C15H11.3.1	WBGene00003834	nxf-1	1962	1988	PAO_17729	1	23	-16.46	UUCCCCUCUUUCGAACUAGCUCCUCCA&UGGUGGAGCCAAGGAGGAUCGAA	(((.(((((((.(.....(((((.(((&))).)))))))))))))...)))
VC5.5.1	WBGene00003725	nhr-135	87	101	PAO_17729	4	19	-14.12	GUCACUUUGGCUCUA&UGGAGCCAAGGAGGAU	(((.(((((((((((&)))))))))))..)))
C06G3.1a.1	WBGene00003695	nhr-105	610	626	PAO_17729	1	19	-14.34	GUCCUCCAUCAAUACCA&UGGUGGAGCCAAGGAGGAU	(((((((.....(((((&))))).......)))))))
H12C20.3a.1	WBGene00003658	nhr-68	2	20	PAO_17729	1	21	-11.4	CGGUUCUAAUCCUCCGUCA&UGGUGGAGCCAAGGAGGAUCG	(((((((..(.((((((((&))))))))...)..)))))))
ZC155.1.1	WBGene00003588	nex-1	122	144	PAO_17729	1	22	-13.7	UCGAUCUCCAACGCUCAGCGCCA&UGGUGGAGCCAAGGAGGAUCGA	(((((((((...((((..(((((&)))))))))...)).)))))))
F57C12.4.1	WBGene00003408	mrp-2	3703	3719	PAO_17729	5	21	-15.17	UGAUUCUCCUGGACUCU&GGAGCCAAGGAGGAUCG	((((((((((((.((((&))))))).)))))))))
C05D11.11a.1	WBGene00003214	mel-32	200	218	PAO_17729	3	22	-17.97	UGGAUGCUCUUGGCUCGGC&GUGGAGCCAAGGAGGAUCGA	(.(((.((((((((((.((&)).))))))).))).))).)
F58B3.1.1	WBGene00003093	lys-4	82	102	PAO_17729	2	20	-13.05	GUUCUUCGUCUCGGCUUUGCU&GGUGGAGCCAAGGAGGAUC	(.(((((.(...(((((((((&))))))))).).))))).)
W02D3.5.1	WBGene00002258	lbp-6	332	348	PAO_17729	4	19	-13.31	AUCACCCGUUGGCUCGA&UGGAGCCAAGGAGGAU	(((..((.(((((((.(&).)))))))))..)))
F40F4.4a.1	WBGene00002255	lbp-3	372	392	PAO_17729	2	22	-14.26	UCGAUUCUUCAUACAUUUACU&GGUGGAGCCAAGGAGGAUCGA	((((((((((.....((((((&)))))).....))))))))))
C25A1.7.1	WBGene00002153	iars-2	2477	2496	PAO_17729	1	21	-16.37	CAAUCCUUCCGCAUUUAUCA&UGGUGGAGCCAAGGAGGAUCG	(.(((((((.((.(((((((&)))))))))...))))))).)
K02E2.4.1	WBGene00002118	ins-35	42	67	PAO_17729	1	18	-14.69	UCCUCGCAAUAAUCUUGGCGUCGCCA&UGGUGGAGCCAAGGAGGA	((((........(((((((.((((((&)))))).)))))))))))
F57B9.6a.1	WBGene00002083	inf-1	1344	1361	PAO_17729	2	22	-18.58	UCUGUUUUCUCCUCCACC&GGUGGAGCCAAGGAGGAUCGA	((.(((((((.(((((((&)))))))....))))))).))
F37B4.2.1	WBGene00002055	ifc-1	1185	1206	PAO_17729	1	21	-20.42	CGAUCCUCCACCCACGUCGCCA&UGGUGGAGCCAAGGAGGAUCG	(((((((((.....(.((((((&)))))).)....)))))))))
C12C8.1.1	WBGene00002026	hsp-70	1130	1146	PAO_17729	1	17	-15.21	CCUCAACUGCUCCAUUA&UGGUGGAGCCAAGGAGG	((((....(((((((((&)))))))))....))))
Y46H3A.2.1	WBGene00002018	hsp-16.41	134	155	PAO_17729	2	22	-13.77	UUGAUCAUUUCUUGGACGAACU&GGUGGAGCCAAGGAGGAUCGA	((((((.((((((((.(..(((&)))...)))))))))))))))
F38E11.1.1	WBGene00002012	hsp-12.3	383	405	PAO_17729	3	23	-12.38	UUGGAGAAUUCCUUGAGAUCCAC&GUGGAGCCAAGGAGGAUCGAA	((.((...(((((((.(.(((((&))))).))))))))..)).))
E04A4.4a.1	WBGene00001983	hoe-1	1219	1237	PAO_17729	2	23	-20.8	UUCGAUCAAUUGCUCCAUC&GGUGGAGCCAAGGAGGAUCGAA	(((((((..((((((((((&))))))).)))....)))))))
Y50E8A.16.1	WBGene00001817	haf-7	1202	1222	PAO_17729	2	23	-22.97	UUCAUGCUCUUUGGCUCGGCU&GGUGGAGCCAAGGAGGAUCGAA	(((((.(((((((((((.(((&))).))))))))))).)).)))
F43E2.4.1	WBGene00001812	haf-2	953	976	PAO_17729	1	21	-18.34	CGAUCUCUUCUACAGUUUCUACCA&UGGUGGAGCCAAGGAGGAUCG	(((((.(((((...(.((((((((&)))))))).).))))))))))
Y53F4B.33.1	WBGene00001787	gst-39	413	429	PAO_17729	5	20	-10.41	GAUUCUCAAUGGGCUUC&GGAGCCAAGGAGGAUC	(((((((....((((((&))))))...)))))))
C02A12.1.1	WBGene00001781	gst-33	698	710	PAO_17729	7	19	-13.26	AUUUUUUUUGGCU&AGCCAAGGAGGAU	(((((((((((((&)))))))))))))
F11G11.2.1	WBGene00001755	gst-7	553	568	PAO_17729	4	20	-11.63	GAUCUUCUGGCUGCCA&UGGAGCCAAGGAGGAUC	((((((((((((.(((&)))))))..))))))))
C05E4.9a.1	WBGene00001564	icl-1	249	264	PAO_17729	1	16	-22.19	CUCCGAGGCUCCAUCG&UGGUGGAGCCAAGGAG	((((..((((((((((&))))))))))..))))
W08D2.4b.1	WBGene00001395	fat-3	29	49	PAO_17729	2	22	-19.94	UCGAUGGCAAAUGGCUCUACC&GGUGGAGCCAAGGAGGAUCGA	(((((......((((((((((&))))))))))......)))))
K10D2.6.1	WBGene00001262	emb-8	1011	1035	PAO_17729	2	23	-14.02	UUCGAUCCUGAUCACGCAUUCCGUC&GGUGGAGCCAAGGAGGAUCGAA	(((((((((......((..((((((&)))))))).....)))))))))
Y105E8A.4.1	WBGene00001156	ech-7	593	600	PAO_17729	12	19	-9.49	AUUCUCCU&AGGAGGAU	((((((((&))))))))
F56B3.5.1	WBGene00001154	ech-5	28	43	PAO_17729	2	17	-15.49	CCUCCGUGCCUUCGCC&GGUGGAGCCAAGGAGG	(((((.((.(((((((&))))))).)).)))))
F49E8.5.1	WBGene00000996	dif-1	227	246	PAO_17729	2	16	-12.67	CUUGUUGGUGUUUCUCCACU&GGUGGAGCCAAGGAG	(((.((((.....(((((((&))))))))))).)))
C45B11.3.1	WBGene00000981	dhs-18	823	839	PAO_17729	4	20	-13.86	GAUCCUCACUUAUUCCA&UGGAGCCAAGGAGGAUC	(((((((.(((.(((((&)))))..))))))))))
R05D8.8.1	WBGene00000977	dhs-14	86	95	PAO_17729	13	22	-14.76	UCGAUUCUCU&GGAGGAUCGA	((((((((((&))))))))))
C17G10.8.1	WBGene00000970	dhs-6	1156	1172	PAO_17729	2	20	-11.69	GAACAUUUCGCUCCACU&GGUGGAGCCAAGGAGGAUC	((.(.((((((((((((&))))))))...))))).))
F40E10.3.1	WBGene00000822	csq-1	1268	1279	PAO_17729	12	23	-11.93	UUUGAUCUACCU&AGGAGGAUCGAA	((((((((.(((&))).))))))))
W07B8.5.1	WBGene00000785	cpr-5	101	121	PAO_17729	2	19	-13.75	AUUCUUCUCGUGGCUGCUGCC&GGUGGAGCCAAGGAGGAU	((((((((..(((((.(((((&))))))))))))))))))
F44C4.3.1	WBGene00000784	cpr-4	453	474	PAO_17729	2	20	-14.5	GUUCUUUCUUGCUGCUCCAACU&GGUGGAGCCAAGGAGGAUC	(.(((((((((..(((((.(((&))))))))))))))))).)
C52E4.1.1	WBGene00000781	cpr-1	330	339	PAO_17729	14	23	-13.88	UUCGAUUCUC&GAGGAUCGAA	((((((((((&))))))))))
F49D11.8.1	WBGene00000780	cpn-4	286	305	PAO_17729	1	22	-15.63	UCAAUUUUCCACUGCCGCCA&UGGUGGAGCCAAGGAGGAUCGA	((.(((((((.((.((((((&))))))))....))))))).))
F14H8.6b.1	WBGene00000562	cng-1	488	508	PAO_17729	1	23	-22.55	UUCGCAUCUUCUUCUCCAUCA&UGGUGGAGCCAAGGAGGAUCGAA	((((.((((((((((((((((&))))))))...))))))))))))
K01C8.10.1	WBGene00000379	cct-4	1660	1674	PAO_17729	1	17	-19.73	CUUCCUGCUCUACCG&UGGUGGAGCCAAGGAGG	(((((((((((((((&)))))))))..))))))
F08F3.7.1	WBGene00000373	cyp-14A5	1574	1597	PAO_17729	1	23	-19.38	UUUGAUUUUCAGUGCGCUCAUCCA&UGGUGGAGCCAAGGAGGAUCGAA	((((((((((..((.((((..(((&)))..))))))..))))))))))
C34E10.6.1	WBGene00000229	atp-2	1231	1250	PAO_17729	2	22	-28.77	UCGAUCCACUUGACUCCACC&GGUGGAGCCAAGGAGGAUCGA	(((((((.((((.(((((((&))))))).))))..)))))))
F26D10.9a.1	WBGene00000224	atgp-1	578	596	PAO_17729	1	20	-17.12	GAUCUCCCUGUGUCUACCA&UGGUGGAGCCAAGGAGGAUC	(((((((.((..(((((((&)))))))..)).))).))))
ZK455.4.1	WBGene00000212	asm-2	1015	1032	PAO_17729	3	20	-15.56	GGUCCUCAGUGGUUGUAU&GUGGAGCCAAGGAGGAUC	(((((((..(((((.(((&))).)))))..)))))))
K07A12.3.1	WBGene00000209	asg-1	127	136	PAO_17729	2	11	-14.15	UGGCUCCACC&GGUGGAGCCA	((((((((((&))))))))))
F54D8.3a.1	WBGene00000107	alh-1	45	61	PAO_17729	1	17	-19.08	CCUCCGGUGUUCCACCA&UGGUGGAGCCAAGGAGG	(((((...(((((((((&)))))))))...)))))
F12E12.11.1	WBGene00044811	F12E12.11	610	625	PAO_1980	5	21	-19.26	GGUGAGCCCGGGAGGA&UCCUCCUUGGCUCCACC	((((((((.(((((((&))))))).)))).))))
C01B10.11.1	WBGene00044294	C01B10.11	689	707	PAO_1980	1	22	-10.27	UGGAAAUGGAGCUGAUCGA&UCGAUCCUCCUUGGCUCCACCA	(((...(((((((((((((&))))))......))))))))))
K02E11.10.1	WBGene00044109	K02E11.10	246	263	PAO_1980	3	22	-23	UGGCGGAGCCGGAGGAUC&GAUCCUCCUUGGCUCCACCA	(((.((((((((((((((&))))))))..)))))).)))
ZK697.14.1	WBGene00022809	ZK697.14	603	632	PAO_1980	1	22	-13.73	UGGUUGGGUCAAGACUGAUAUGGGGGGAGA&UCGAUCCUCCUUGGCUCCACCA	((((.((((((((........(((((..((&))..))))))))))))).))))
ZC97.1a.1	WBGene00022516	mtx-2	344	368	PAO_1980	1	19	-10.29	UGAGAGCUAAUAUUUCGAUGAUCGA&UCGAUCCUCCUUGGCUCCA	((.(((((((......((.((((((&)))))).)).)))))))))
Y82E9BR.18.1	WBGene00022350	Y82E9BR.18	2467	2483	PAO_1980	1	17	-18.56	GAGCCCGAGGAAGACGA&UCGAUCCUCCUUGGCUC	(((.(((((((.(((((&))).)).))))))))))
Y58A7A.3.1	WBGene00021977	Y58A7A.3	2388	2410	PAO_1980	1	20	-14.77	GUGGAGCUGCAAGAGAUGUUCGA&UCGAUCCUCCUUGGCUCCAC	(((((((..((((.((.(.((((&)))).).)))))))))))))
Y54F10AM.5.1	WBGene00021849	Y54F10AM.5	219	228	PAO_1980	11	20	-11.08	GUGGAGUCAA&UUGGCUCCAC	((((((((((&))))))))))
Y54E10A.17a.1	WBGene00021835	Y54E10A.17	236	259	PAO_1980	1	16	-8.91	AGCCAAGCCUUGUGACUGGAACGA&UCGAUCCUCCUUGGCU	(((((((..........(((.(((&))).)))..)))))))
Y53G8B.2.1	WBGene00021818	Y53G8B.2	213	229	PAO_1980	7	23	-11.93	AUGGAUUCUCCGAGGAG&CUCCUUGGCUCCACCAU	((((.....((((((((&)))))))).....))))
Y50D4B.2a.1	WBGene00021741	Y50D4B.2	384	396	PAO_1980	7	19	-13.51	UGGAUACAAGGAG&CUCCUUGGCUCCA	((((..(((((((&)))))))..))))
Y49C4A.8a.1	WBGene00021709	ugt-29	1352	1358	PAO_1980	5	11	-11.43	GGGAGGA&UCCUCCU	(((((((&)))))))
Y48G8AL.5a.1	WBGene00021686	nsun-2	149	168	PAO_1980	1	23	-23.45	AUGGUGGAGAAGGAGAAUGA&UCGAUCCUCCUUGGCUCCACCAU	(((((((((((((((.((((&)).)).))))))..)))))))))
W10D9.5b.1	WBGene00021133	tomm-22	119	138	PAO_1980	4	22	-14.76	UGGGGUGUUAAGGGAGUGGU&AUCCUCCUUGGCUCCACCA	(((((.(((((((.((.(((&)))))))))))).)).)))
W03G1.5.1	WBGene00021011	W03G1.5	652	670	PAO_1980	3	23	-13.52	GUGGUGGCCGCUCAGGAUC&GAUCCUCCUUGGCUCCACCAU	((((((((((...((((((&))))))...)))..)))))))
R151.9.1	WBGene00020112	pfd-5	258	278	PAO_1980	4	22	-13.96	UGGUGGAGAUCGGAACUGGAU&AUCCUCCUUGGCUCCACCA	((((((((...(((...((((&)))))))....))))))))
R08F11.1a.1	WBGene00019965	R08F11.1	1279	1300	PAO_1980	1	19	-15.29	UGGAAAACCGAGGAGAGUUUGA&UCGAUCCUCCUUGGCUCCA	((((...((((((((.(.((((&)))).))))))))).))))
R02E12.6.2	WBGene00019830	hrg-1	137	153	PAO_1980	1	18	-13.89	GGAGCCAUGAACAUUGA&UCGAUCCUCCUUGGCUCC	(((((((.((..(((((&)))))..))..)))))))
M60.7.1	WBGene00019782	M60.7	1038	1048	PAO_1980	9	19	-14.44	UGGAGCUAAGG&CCUUGGCUCCA	(((((((((((&)))))))))))
K11G9.1.1	WBGene00019652	cest-34	632	650	PAO_1980	3	21	-15.19	GGUGGAGCUUGCGUAGAUC&GAUCCUCCUUGGCUCCACC	(((((((((...(..((((&))))..)...)))))))))
K09F6.10.1	WBGene00019593	K09F6.10	349	365	PAO_1980	2	18	-16.47	GGAGUUGGGGAUUAUCG&CGAUCCUCCUUGGCUCC	(((((((((((..((((&))))..)))))))))))
K08D9.4a.1	WBGene00019525	K08D9.4	503	525	PAO_1980	3	17	-11.85	GGGUUGAGGAUUAAUAAAGGGUC&GAUCCUCCUUGGCUC	((((((((((........(((((&)))))))))))))))
K06A5.6.1	WBGene00019433	acdh-3	283	298	PAO_1980	3	23	-16.83	AUGGUGGACCAGGAUC&GAUCCUCCUUGGCUCCACCAU	((((((((((((((((&))))))....)).))))))))
H06H21.6.1	WBGene00019163	ubxn-6	752	775	PAO_1980	1	22	-13.87	UGGUGGAGGCUCUGGAAGCUUUGA&UCGAUCCUCCUUGGCUCCACCA	((((((((.(...((.((..((((&))))..))))..).))))))))
F59B1.8.1	WBGene00019100	F59B1.8	139	159	PAO_1980	4	23	-15.2	AUGGAGGUUAUUGGGGAGGGU&AUCCUCCUUGGCUCCACCAU	((((.((...(((((((((((&)))))))))))..)).))))
F58F9.7.1	WBGene00019060	acox-3	1765	1787	PAO_1980	3	22	-11.15	UGGUGGAAAGUUUGGAGAAGAUC&GAUCCUCCUUGGCUCCACCA	(((((((..(((.((((..((((&))))))))..))))))))))
F57B10.3a.1	WBGene00019001	ipgm-1	477	495	PAO_1980	2	22	-12.97	UGGUGGAUGCUUGCGAUCG&CGAUCCUCCUUGGCUCCACCA	(((((((.(((.(.(((((&)))))...)..))))))))))
F56C11.6a.1	WBGene00018958	cest-27	632	650	PAO_1980	3	21	-17.53	GGUGGAGCAUCUGUGGAUC&GAUCCUCCUUGGCUCCACC	((((((((....(.(((((&))))).)....))))))))
F55F8.5.1	WBGene00018893	wdr-12	1110	1120	PAO_1980	1	10	-10.05	GGAUGGGUUGA&UCGAUCCUCC	(((.(((((((&))))))))))
F54D11.1.1	WBGene00018811	pmt-2	895	915	PAO_1980	2	23	-19.95	GUGGUGGAGCUAGACAGGUUG&CGAUCCUCCUUGGCUCCACCAU	(((((((((((((..((((((&))).)))..)))))))))))))
F54A5.2b.1	WBGene00018787	cutl-20	52	61	PAO_1980	7	17	-13.22	GACCAAGGAG&CUCCUUGGCUC	((((((((((&)))))))).))
F53C3.6a.1	WBGene00018750	F53C3.6	140	156	PAO_1980	2	21	-18.32	GGUGGUGUAGGAGGACG&CGAUCCUCCUUGGCUCCACC	(((((.(((((((((((&)).)))))))..)).)))))
F52E4.5.1	WBGene00018702	F52E4.5	509	529	PAO_1980	1	19	-8.01	UGGAGCUUCUUCUACUGUCGA&UCGAUCCUCCUUGGCUCCA	(((((((.........(((((&))))).......)))))))
F44E7.8a.1	WBGene00018430	nhr-142	429	443	PAO_1980	1	16	-11.43	AGUCAAGGAUGUCGA&UCGAUCCUCCUUGGCU	(((((((((.(((((&)))).).)))))))))
F44C8.1.1	WBGene00018413	cyp-33C4	576	589	PAO_1980	5	21	-14.25	GGUGAUAAGGAGGA&UCCUCCUUGGCUCCACC	((((.(((((((((&)))))))))....))))
F43E2.3b.1	WBGene00018392	insc-1	236	245	PAO_1980	10	19	-15.74	UGGAGCCAAG&CUUGGCUCCA	((((((((((&))))))))))
F41C3.5.1	WBGene00018271	ctsa-1.1	774	783	PAO_1980	1	10	-14.19	GGAGGAUUGA&UCGAUCCUCC	((((((((((&))))))))))
F41B5.4.1	WBGene00018262	cyp-33C3	757	773	PAO_1980	1	21	-16.15	GGUGAUAAGGAGGAAGA&UCGAUCCUCCUUGGCUCCACC	((((.(((((((((.((&))..)))))))))....))))
F28C10.3.1	WBGene00017898	F28C10.3	949	966	PAO_1980	4	18	-12.35	GGAGUUGUCUGGGAGGAU&AUCCUCCUUGGCUCC	(((((((...((((((((&)))))))))))))))
F28A12.4.1	WBGene00017881	asp-13	683	709	PAO_1980	1	20	-12.3	GUGGUGCAUUCACUUAUGGAGGAUUGG&UCGAUCCUCCUUGGCUCCAC	((((.((..........((((((((((&))))))))))...)).))))
F28A10.6.1	WBGene00017874	acdh-9	236	254	PAO_1980	3	20	-20.07	GUGGCGACCAUGGAGGAUC&GAUCCUCCUUGGCUCCAC	((((.(.(((.((((((((&)))))))).)))).))))
F21F8.11.1	WBGene00017681	slc-17.5	432	453	PAO_1980	1	22	-18.03	UGCUGGAGUCUUGGUAGAUCGG&UCGAUCCUCCUUGGCUCCACCA	((.(((((((..((..((((((&))))))..))..))))))).))
F18E3.7a.1	WBGene00017565	ddo-2	613	632	PAO_1980	1	18	-10.95	GGAGUCAUUUUGGAAGUUGA&UCGAUCCUCCUUGGCUCC	(((((((....(((..((((&)))))))....)))))))
F16B4.9.1	WBGene00017510	nhr-178	817	839	PAO_1980	1	18	-12.08	GGAGACUCCUGGGGAGGUUAUGA&UCGAUCCUCCUUGGCUCC	((((....(((((((((.(.(((&)))).)))))))))))))
F15E6.6.1	WBGene00017487	F15E6.6	496	517	PAO_1980	6	23	-14.48	GUGGUGGAGGAUGCUGUGGGGG&CCUCCUUGGCUCCACCAU	((((((((....((((.(((((&))))).))))))))))))
F14F9.4.1	WBGene00017467	F14F9.4	640	660	PAO_1980	3	18	-14.17	GGGGACAAGAUCAGGAGGAUU&GAUCCUCCUUGGCUCC	((((.((.....(((((((((&))))))))))).))))
F13C5.1.1	WBGene00017422	F13C5.1	307	320	PAO_1980	1	15	-12.21	GUCAAGGAAAUCGA&UCGAUCCUCCUUGGC	((((((((.(((((&)))))..))))))))
F10E7.8a.1	WBGene00017349	farl-11	1145	1161	PAO_1980	3	19	-14.76	UGGAGGUUGGGAGGAGC&GAUCCUCCUUGGCUCCA	(((((.(.(((((((.(&).))))))).).)))))
F09F7.8.1	WBGene00017305	nspb-12	194	206	PAO_1980	3	17	-11.46	GGGCUUGGGGAUC&GAUCCUCCUUGGCUC	(((((.(((((((&)))))))...)))))
F09E5.3.1	WBGene00017283	F09E5.3	461	477	PAO_1980	1	18	-11.28	GGAGCUACUGAAAUCGA&UCGAUCCUCCUUGGCUCC	(((((((..((.(((((&)))))..))..)))))))
DC2.5a.1	WBGene00017082	DC2.5	975	985	PAO_1980	7	17	-17.57	GAGCCAGGGAG&CUCCUUGGCUC	(((((((((((&)))))))))))
D2096.8.1	WBGene00017075	nap-1	678	692	PAO_1980	5	18	-11.16	GGAGCUAAUGCUGGA&UCCUCCUUGGCUCC	((((((((.(..(((&)))..)))))))))
D2063.1.1	WBGene00017060	D2063.1	573	588	PAO_1980	3	23	-19.12	GUGGUGGGCUGGGAUC&GAUCCUCCUUGGCUCCACCAU	((((((((((((((((&))))))....))).)))))))
D1005.3.1	WBGene00016997	cebp-1	367	384	PAO_1980	1	18	-11.59	GGAGCUGAACGGAUAUGA&UCGAUCCUCCUUGGCUCC	((((((((..((((.(((&)))))))...))))))))
CD4.7a.1	WBGene00016992	zhit-1	217	231	PAO_1980	1	17	-8.89	GAGCCGGAUUAUCGA&UCGAUCCUCCUUGGCUC	(((((((...(((((&))))).....)))))))
C55B7.4a.1	WBGene00016943	acdh-1	725	742	PAO_1980	1	19	-11.5	UGUAGAUAAGGAGGAAGA&UCGAUCCUCCUUGGCUCCA	((.((.(((((((((.((&))..))))))))).)).))
C49G7.3.1	WBGene00016781	C49G7.3	489	512	PAO_1980	4	20	-16.58	GUGGAUUCUGUAACCAGGGAGGAU&AUCCUCCUUGGCUCCAC	(((((........(((((((((((&))))))))))).)))))
C49A9.8.1	WBGene00016762	ugt-24	235	248	PAO_1980	5	17	-13.13	GAGCCAGAUGAGGA&UCCUCCUUGGCUC	(((((((..(((((&))))).)))))))
C44B7.10.1	WBGene00016630	acer-1	1128	1149	PAO_1980	1	20	-11.09	GUGGAGCAGCAAUUGGAAACGA&UCGAUCCUCCUUGGCUCCAC	(((((((.......(((..(((&))).)))......)))))))
C37H5.2.1	WBGene00016506	abhd-5.1	1079	1098	PAO_1980	3	20	-12.57	GUGGAGCUCGUCAUAGGAUC&GAUCCUCCUUGGCUCCAC	(((((((.((....((((((&))))))...)))))))))
C29F5.1.1	WBGene00016210	C29F5.1	1208	1227	PAO_1980	7	22	-11.43	UGGUGGAAUCAGUAAGGGAG&CUCCUUGGCUCCACCA	(((((((....((.((((((&)))))).)))))))))
C17C3.1a.1	WBGene00015887	C17C3.1	519	526	PAO_1980	11	18	-11.08	GGAGCCAG&UUGGCUCC	((((((((&))))))))
C15B12.8.1	WBGene00015788	C15B12.8	34	54	PAO_1980	2	18	-13.62	GGAGCCGGUAUUUUUGGAUCG&CGAUCCUCCUUGGCUCC	((((((((.......((((((&))))))...))))))))
C12D5.7.1	WBGene00015709	cyp-33A1	642	658	PAO_1980	1	17	-11.28	GAGCUGAAGAAGGUGGA&UCGAUCCUCCUUGGCUC	(((((((.((.(((.((&)).))).)).)))))))
C10H11.4.1	WBGene00015693	ugt-28	682	702	PAO_1980	3	22	-16.12	UGGAUGGUUGUUAAGGAAAUC&GAUCCUCCUUGGCUCCACCA	(((.(((..((((((((.(((&)))..)))))))).))))))
C07G3.2.1	WBGene00015574	irg-1	495	512	PAO_1980	1	17	-14.58	GAAACUGGAGAGGAUCGA&UCGAUCCUCCUUGGCUC	((..(.((.(((((((((&))))))))))).)..))
C07D10.2a.1	WBGene00015567	bath-44	1130	1138	PAO_1980	11	19	-8.84	UGGAGCCAG&UUGGCUCCA	(((((((((&)))))))))
C06E7.1a.1	WBGene00015538	sams-3	814	837	PAO_1980	3	23	-17.61	AUGGGGAGCUCACGGAGGAGGUGC&GAUCCUCCUUGGCUCCACCAU	((((((((((....(((((((..(&)..))))))))))))).))))
C06A8.1a.1	WBGene00015512	mthf-1	548	567	PAO_1980	1	16	-15.34	AGCCAAGGCAAUGGGAUUGA&UCGAUCCUCCUUGGCU	((((((((....((((((((&))))))))))))))))
C01B12.3.1	WBGene00015286	best-3	1287	1309	PAO_1980	7	23	-12.79	AUGGUGGUAGGAAACUGAGUGAG&CUCCUUGGCUCCACCAU	(((((((.((....(((((.(((&)))))))))))))))))
B0361.8.1	WBGene00015162	algn-11	576	586	PAO_1980	10	20	-8.98	GUAGAGUCAAG&CUUGGCUCCAC	((.((((((((&)))))))).))
B0205.6.1	WBGene00015021	nfs-1	766	789	PAO_1980	3	22	-19.77	UGGUGGAGGACAGGAAAGAGGAUU&GAUCCUCCUUGGCUCCACCA	((((((((..((((...(((((((&))))))))))).))))))))
K08E5.1b.1	WBGene00014801	K08E5.1	771	797	PAO_1980	1	17	-13.71	GAGCCGAGAAAAAGCAAGAAGGAGUGG&UCGAUCCUCCUUGGCUC	((((((((.........(.((((.(((&))).)))))))))))))
ZK1320.4.1	WBGene00014254	cyp-13A10	1035	1065	PAO_1980	3	20	-12.69	GUGGAGCAUUUUCAAGAGAAUAAUGGGGAUU&GAUCCUCCUUGGCUCCAC	(((((((.....((((........(((((((&))))))))))))))))))
ZK896.5.1	WBGene00014136	ZK896.5	1087	1106	PAO_1980	3	20	-11.26	GUGGACGGUCGUAGAGGAUU&GAUCCUCCUUGGCUCCAC	(((((..((((..(((((((&)))))))..)))))))))
ZK822.5a.1	WBGene00014092	ZK822.5	736	754	PAO_1980	1	20	-16.55	GUGAAUUAGGGAGGAUGGA&UCGAUCCUCCUUGGCUCCAC	((((.(((((((((((.((&)).))))))))))).).)))
ZK632.3.1	WBGene00014012	riok-3	136	158	PAO_1980	3	17	-12.11	GAGCGAAGAAUUUAUUGAGGAUC&GAUCCUCCUUGGCUC	((((.(((........(((((((&)))))))))).))))
ZK617.2.1	WBGene00014009	lips-6	568	590	PAO_1980	3	23	-17.29	GUGGCCGGAGCCAAUCAGGGAUC&GAUCCUCCUUGGCUCCACCAU	((((..((((((((...((((((&))))))..)))))))).))))
ZC376.7a.1	WBGene00013878	atfs-1	1362	1381	PAO_1980	1	17	-13.43	GAGCCGAGAAGAAGGGAAGA&UCGAUCCUCCUUGGCUC	((((((((..(.((((..((&))..)))))))))))))
Y73F4A.2.1	WBGene00013515	Y73F4A.2	193	219	PAO_1980	1	23	-8.55	AUGGACUGGAGUUGGGUUUGGAGAUGA&UCGAUCCUCCUUGGCUCCACCAU	((((..((((((((((...(((..(((&))).)))..))))))))))))))
Y60A3A.7.1	WBGene00013358	abhd-3.1	528	542	PAO_1980	3	17	-11.67	GAUCAAGGAGAGAUU&GAUCCUCCUUGGCUC	((((((((((.((((&)))))))))))).))
Y57G11C.34.1	WBGene00013324	mrps-7	423	440	PAO_1980	5	21	-16.25	GGUGUAACCCGAGGAGGA&UCCUCCUUGGCUCCACC	((((....((((((((((&))))))))))...))))
Y57A10C.6.1	WBGene00013284	daf-22	1177	1190	PAO_1980	7	22	-13.89	UGGUGGAGCUGGAG&CUCCUUGGCUCCACCA	((((((((((((((&))))..))))))))))
Y51A2D.9b.1	WBGene00013077	ttr-24	179	201	PAO_1980	3	20	-8.54	GUGAAGCUUUUCGAGGAUGGAAC&GAUCCUCCUUGGCUCCAC	(((.((....(((((((.(((.(&).)))))))))))).)))
Y46G5A.18a.1	WBGene00012908	Y46G5A.18	1076	1089	PAO_1980	1	15	-17.36	GCCGAGGAGAUCGA&UCGAUCCUCCUUGGC	((((((((((((((&))))).)))))))))
Y38F1A.6.1	WBGene00012608	hphd-1	575	582	PAO_1980	3	10	-13.86	GGAGGAUC&GAUCCUCC	((((((((&))))))))
W09H1.5.1	WBGene00012375	mecr-1	815	829	PAO_1980	4	19	-16.06	UGGACCACGGAGGAU&AUCCUCCUUGGCUCCA	(((((((.(((((((&))))))).))).))))
R107.5a.1	WBGene00011300	R107.5	560	575	PAO_1980	1	13	-13.81	CGAGGAGGAAGAUCGA&UCGAUCCUCCUUG	(((((((((...((((&)))))))))))))
R53.4.1	WBGene00011273	R53.4	231	246	PAO_1980	3	20	-9.86	GUGAAGCUAGGAGAUC&GAUCCUCCUUGGCUCCAC	(((.(((((((.((((&))))...))))))).)))
R11A5.4a.1	WBGene00011232	pck-2	1121	1139	PAO_1980	1	15	-15.01	GCCAAGGAUGAAGGAUGGA&UCGAUCCUCCUUGGC	((((((((....((((.((&)).))))))))))))
R07E5.13.1	WBGene00011119	mpc-1	350	373	PAO_1980	1	22	-9.69	UGAUGAUGAAAAAGGAGGUUUUGG&UCGAUCCUCCUUGGCUCCACCA	((.((..(...(((((((..((((&)))).)))))))..)..)).))
R07E3.1a.1	WBGene00011102	R07E3.1	1039	1058	PAO_1980	5	19	-11.31	UGAGAGCAUACAAAGGAGGA&UCCUCCUUGGCUCCA	((.((((...((.(((((((&)))))))))))))))
R03D7.1.1	WBGene00010988	metr-1	391	415	PAO_1980	1	23	-15.05	GUGUGCGGAGCCAUUGGACCUACGA&UCGAUCCUCCUUGGCUCCACCAU	(((.(.(((((((..(((....(((&)))....))).))))))).))))
M88.1.1	WBGene00010904	ugt-62	375	396	PAO_1980	1	20	-13.24	GUGCGAAACAAGGAGUUUAUGA&UCGAUCCUCCUUGGCUCCAC	(((.((..(((((((..(.(((&))))..)))))))..)))))
M05D6.6.1	WBGene00010879	taap-1	147	160	PAO_1980	1	16	-9.26	GGCCAGGAGGUUGA&UCGAUCCUCCUUGGCU	((((((((((((((&)))).))).)))))))
K12G11.3.1	WBGene00010790	sodh-1	597	617	PAO_1980	1	19	-14.05	UGGAGCCGGAGGUGGUCUCGG&UCGAUCCUCCUUGGCUCCA	((((((((.(((.((..((((&)))).)).)))))))))))
K09A9.1.1	WBGene00010700	nipi-3	180	186	PAO_1980	10	16	-9.13	AGCCAAG&CUUGGCU	(((((((&)))))))
K07C5.4.1	WBGene00010627	nol-56	1316	1334	PAO_1980	3	19	-13.63	UGAGGUUAAGGAGAAGGUC&GAUCCUCCUUGGCUCCA	((.((((((((((..((((&)))))))))))))).))
K02A11.3.1	WBGene00010488	endu-1	321	341	PAO_1980	1	20	-8.5	GUGUUAGCCAAGCUGAAGAGA&UCGAUCCUCCUUGGCUCCAC	(((..(((((((..(.(..((&))..).)..))))))).)))
K01D12.10.1	WBGene00010469	K01D12.10	419	440	PAO_1980	1	20	-25.96	GUGGAGAAAAAGGAGGAAAAGG&UCGAUCCUCCUUGGCUCCAC	((((((...((((((((...((&))..))))))))..))))))
F59A2.3.1	WBGene00010303	cri-3	387	408	PAO_1980	3	20	-11.39	GUCGAGAUUACCAAGGGAGAUC&GAUCCUCCUUGGCUCCAC	((.(((....(((((((.((((&)))).)))))))))).))
F54D5.11.1	WBGene00010054	gtf-2E2	930	951	PAO_1980	3	23	-20.26	AUGGACGGAGUUUUGGAGGAUU&GAUCCUCCUUGGCUCCACCAU	((((..((((((..((((((((&))))))))..)))))).))))
F53F4.10.1	WBGene00009992	F53F4.10	82	100	PAO_1980	1	21	-17.41	GGCGGAGCUACUGGAUUGA&UCGAUCCUCCUUGGCUCCACC	((.(((((((..(((((((&)))))))....))))))).))
F53A2.7.1	WBGene00009952	acaa-2	79	101	PAO_1980	1	22	-19.15	UGGUGGAAAGCUGAAAGGAUUGA&UCGAUCCUCCUUGGCUCCACCA	(((((((..(((((.((((((((&))))))))..))))))))))))
F44G3.2.1	WBGene00009706	argk-1	404	413	PAO_1980	7	17	-12.6	GACCAAGGAG&CUCCUUGGCUC	((((((((((&)))))))).))
F44A6.5.1	WBGene00009677	F44A6.5	695	704	PAO_1980	6	15	-10.98	GCAAAGGAGG&CCUCCUUGGC	((.(((((((&))))))).))
F32D8.12a.1	WBGene00009334	F32D8.12	1042	1055	PAO_1980	3	18	-15.24	GGAGCAAGAGGAUU&GAUCCUCCUUGGCUCC	((((((((((((((&))))))).)).)))))
F31D4.9.1	WBGene00009294	F31D4.9	54	60	PAO_1980	13	19	-11.94	UGGAGCC&GGCUCCA	(((((((&)))))))
F28F8.2.1	WBGene00009221	acs-2	1337	1350	PAO_1980	7	19	-13.84	UGGAGCUAAAGGAG&CUCCUUGGCUCCA	(((((((.((((((&)))))))))))))
F27D4.1.1	WBGene00009187	F27D4.1	732	751	PAO_1980	3	18	-11.87	GGAGCCGGAGUCGGAGCAUC&GAUCCUCCUUGGCUCC	((((((((....((((.(((&))).))))))))))))
F14F7.3.1	WBGene00008810	cyp-13A12	1431	1439	PAO_1980	4	12	-12.11	AAGGAGGAU&AUCCUCCUU	(((((((((&)))))))))
F11C1.5a.1	WBGene00008694	vwa-8	4413	4436	PAO_1980	5	21	-13.23	GGUGGAAAUCAAUGGAUGGGAGGA&UCCUCCUUGGCUCCACC	((((((..(((......(((((((&)))))))))).))))))
F09F3.9.1	WBGene00008629	cpt-5	1300	1315	PAO_1980	7	21	-20.67	GGUGGGGCUACUGGAG&CUCCUUGGCUCCACC	((((((((((..((((&)))).))))))))))
F09B12.3.1	WBGene00008607	F09B12.3	1603	1614	PAO_1980	5	15	-12.89	GCACAAGGAGGG&UCCUCCUUGGC	((.(((((((((&)))))))))))
F08H9.6.1	WBGene00008594	clec-57	381	388	PAO_1980	10	17	-10.61	GAGCCAAG&CUUGGCUC	((((((((&))))))))
F08A8.3.1	WBGene00008566	acox-1.3	382	392	PAO_1980	10	21	-12.69	GGCGAGCCAAG&CUUGGCUCCACC	((.((((((((&))))))))..))
F02A9.4.1	WBGene00008514	mrpl-44	223	229	PAO_1980	3	9	-11.73	GAGGAUC&GAUCCUC	(((((((&)))))))
E03H4.7.1	WBGene00008475	oac-13	1592	1620	PAO_1980	3	21	-16.51	GGUUGAGCUCAAGUACAAAAAAGAGGAUU&GAUCCUCCUUGGCUCCACC	(((.((((.((((.........(((((((&))))))))))))))).)))
DH11.2.1	WBGene00008436	DH11.2	494	515	PAO_1980	1	18	-13.61	GGAGCAGAAUGUGGUGGAUUGA&UCGAUCCUCCUUGGCUCC	(((((.((....((.(((((((&))))))).)))).)))))
C55A6.5.1	WBGene00008334	sdz-8	625	646	PAO_1980	5	21	-9.78	GGUGCAAACCAAUUUAGGAGGG&UCCUCCUUGGCUCCACC	((((....(((....(((((((&))))))))))...))))
C54D10.1.1	WBGene00008296	cdr-2	42	58	PAO_1980	3	21	-9.07	GUUGGAGCCGUUGGGUU&GAUCCUCCUUGGCUCCACC	(.((((((((..(((((&)))))....)))))))).)
C47E12.4a.1	WBGene00008149	pyp-1	602	615	PAO_1980	7	19	-15.52	UGGAGCUAAAGGAG&CUCCUUGGCUCCA	(((((((((.((((&)))))))))))))
C37A5.1.1	WBGene00007988	best-8	1309	1328	PAO_1980	1	19	-11.59	UGGAGCUUUUGAGCUAUCGA&UCGAUCCUCCUUGGCUCCA	(((((((...(((..(((((&))))).)))...)))))))
C36A4.9a.1	WBGene00007969	acs-19	278	292	PAO_1980	10	23	-16.13	AUGGAUGGAGCCAAG&CUUGGCUCCACCAU	((((.((((((((((&))))))))))))))
C34C12.8.1	WBGene00007927	C34C12.8	451	464	PAO_1980	5	19	-9.17	UGGAAUCGGGAGGA&UCCUCCUUGGCUCCA	((((.(((((((((&))))))).)).))))
C33A12.3a.1	WBGene00007882	C33A12.3	51	58	PAO_1980	9	16	-8.45	AGCCGAGG&CCUUGGCU	((((((((&))))))))
C31E10.7.1	WBGene00007848	cytb-5.1	309	325	PAO_1980	2	16	-12.16	AGCAGAGAGGAGGAGAG&CGAUCCUCCUUGGCU	(((...((((((((..(&)..)))))))).)))
C30H6.7a.1	WBGene00007824	dlat-2	708	722	PAO_1980	3	17	-18.74	GUUCCAGGGAGGAUC&GAUCCUCCUUGGCUC	(..((((((((((((&))))))))))))..)
C29F7.2a.1	WBGene00007811	C29F7.2	174	186	PAO_1980	7	18	-15.03	GGAGCACGAGGAG&CUCCUUGGCUCC	(((((.(((((((&))))))))))))
C27H6.4a.1	WBGene00007786	rmd-2	567	587	PAO_1980	1	19	-17.98	UGGAACCAAGGAAAAGAUUGA&UCGAUCCUCCUUGGCUCCA	((((.(((((((...((((((&)))))).))))))).))))
C27A7.5a.1	WBGene00007756	C27A7.5	383	402	PAO_1980	1	22	-11.01	UGGUGGAACUAUUGGAAUGA&UCGAUCCUCCUUGGCUCCACCA	(((((((.(((..(((.(((&))).)))....))).)))))))
C15C8.3a.1	WBGene00007605	hrg-7	1200	1219	PAO_1980	3	17	-11.41	GAGUUAACUGCUGGAGGAUU&GAUCCUCCUUGGCUC	(((((((.....((((((((&)))))))))))))))
C14C10.3a.1	WBGene00007586	ril-2	573	593	PAO_1980	3	18	-13.13	GGAGCCAAGUACAUCUGGGUU&GAUCCUCCUUGGCUCC	(((((((((.......(((((&)))))..)))))))))
C14B1.3.1	WBGene00007574	C14B1.3	988	994	PAO_1980	3	9	-8.44	GAGGAUU&GAUCCUC	(((((((&)))))))
C14A4.14.1	WBGene00007564	mrps-22	1148	1169	PAO_1980	1	20	-26.84	GUGGACGUGAAGGAGGAGGAGG&UCGAUCCUCCUUGGCUCCAC	(((((.((.((((((((...((&))..)))))))).)))))))
C08F8.2b.1	WBGene00007444	C08F8.2	809	833	PAO_1980	1	19	-12.19	UGCGAGUCGAGGUUGCGGUAAUCGA&UCGAUCCUCCUUGGCUCCA	((.(((((((((....((..(((((&))))))).)))))))))))
C06H2.1.1	WBGene00007385	atp-5	380	390	PAO_1980	9	20	-18.52	GUGGGCCAAGG&CCUUGGCUCCAC	(((((((((((&))))))).))))
C05C10.3.1	WBGene00007330	C05C10.3	1431	1452	PAO_1980	1	20	-15.56	GUGGACACAAAGAACGGAUUGA&UCGAUCCUCCUUGGCUCCAC	(((((..(((.((..(((((((&))))))))).)))..)))))
C01A2.4.1	WBGene00007216	C01A2.4	116	129	PAO_1980	1	15	-10.75	GUCAAAUGGAUCGA&UCGAUCCUCCUUGGC	(((((..(((((((&)))))))...)))))
B0564.1a.1	WBGene00007201	exos-4.1	458	475	PAO_1980	7	20	-10.31	GUGAAGUAAUCCAAGGAG&CUCCUUGGCUCCAC	(((.((....((((((((&)))))))))).)))
B0457.6.1	WBGene00007180	B0457.6	176	183	PAO_1980	11	18	-11.73	GGAGCCAA&UUGGCUCC	((((((((&))))))))
B0399.2.1	WBGene00007177	oac-1	1338	1353	PAO_1980	2	17	-15.22	GAGCUGAGGAAGAAUG&CGAUCCUCCUUGGCUC	((((((((((.((.((&)).)).))))))))))
B0285.4.1	WBGene00007137	lcmt-1	824	846	PAO_1980	1	23	-13.65	GUGCUGAGAAACAGGAGGAGAGA&UCGAUCCUCCUUGGCUCCACCAU	(((.((.((..((((((((..((&))..))))))).)..)))).)))
B0272.3.1	WBGene00007129	B0272.3	385	391	PAO_1980	15	21	-9.57	GGUGGAG&CUCCACC	(((((((&)))))))
C16A3.7.1	WBGene00007048	nfx-1	3151	3177	PAO_1980	2	22	-18.56	UGGUGGAAAGACGAGGAAGAAGGGUGG&CGAUCCUCCUUGGCUCCACCA	(((((((....((((((....((((.(&).))))))))))..)))))))
W01A8.1a.1	WBGene00007024	plin-1	683	694	PAO_1980	3	14	-12.79	CCAAGGAGUAUC&GAUCCUCCUUGG	((((((((.(((&))).))))))))
K07E3.8.1	WBGene00006890	vem-1	501	524	PAO_1980	1	20	-17.08	GUGGAGCCGAGUCUUUGGAUUCGA&UCGAUCCUCCUUGGCUCCAC	(((((((((((.....(((.((((&)))))))..)))))))))))
C35B1.1.1	WBGene00006701	ubc-1	572	587	PAO_1980	1	18	-20.99	GGAGCCAGUGGAUCGA&UCGAUCCUCCUUGGCUCC	((((((((.(((((((&)))))))...))))))))
C01G6.6a.1	WBGene00006510	mtrr-1	669	675	PAO_1980	2	8	-9.7	AGGAUCG&CGAUCCU	(((((((&)))))))
E02H1.3.1	WBGene00006473	tag-124	814	824	PAO_1980	13	23	-13.79	AUGGUGGAGCU&GGCUCCACCAU	(((((((((((&)))))))))))
C31C9.1d.1	WBGene00006404	tag-10	1308	1325	PAO_1980	4	21	-20.17	GGUGGUCUCGAGGAGGAU&AUCCUCCUUGGCUCCACC	(((((..(((((((((((&)))))))))))..)))))
K11D12.3a.1	WBGene00005655	srr-4	420	444	PAO_1980	1	20	-11.47	GUGUUGAGCCAAAUGAAGAAAUCGA&UCGAUCCUCCUUGGCUCCAC	(((..(((((((..((.((..((((&)))))).)).))))))))))
C27B7.1a.1	WBGene00005007	spr-2	827	854	PAO_1980	1	23	-18.12	AUGGUGUUGAAGAAGAAGCGGAGGGUGA&UCGAUCCUCCUUGGCUCCACCAU	((((((..(..((......(((((((((&)).)))))))))..)..))))))
C54G6.5.1	WBGene00005002	spp-17	173	199	PAO_1980	3	20	-10.27	GUGGAUGCAAUCUGCUUGAAGGAGGUC&GAUCCUCCUUGGCUCCAC	(((((........(((..(((((((((&)).)))))))))))))))
C28C12.7b.1	WBGene00004995	spp-10	703	726	PAO_1980	1	21	-12.31	GGAAAAGGUUGAGAAUGAGGUCGA&UCGAUCCUCCUUGGCUCCACC	((....(((((((...((((((((&)))).)))))))))))...))
Y71F9B.4.1	WBGene00004920	snr-7	213	232	PAO_1980	3	19	-18.82	UGGAGCCCAAGGAGAGAAUC&GAUCCUCCUUGGCUCCA	((((((.(((((((.(.(((&)))))))))))))))))
F56E10.4.2	WBGene00004496	rps-27	238	255	PAO_1980	5	16	-9.28	GGCCAAGCUCACCGAGGG&UCCUCCUUGGCU	(((((((......(((((&))))))))))))
C27A2.2a.1	WBGene00004434	rpl-22	96	122	PAO_1980	1	16	-8.14	AGUUGAGGAUGGAAUUCUCAGAAUCGA&UCGAUCCUCCUUGGCU	(((((((((.(((..........((((&))))))))))))))))
C12D8.11.1	WBGene00004405	rop-1	38	66	PAO_1980	1	21	-16.42	GGCUGGAAAUUUUAACGAGGAGGCAUUGA&UCGAUCCUCCUUGGCUCCACC	((.((((........((((((((.(((((&)))))))))))))..))))))
D2023.2a.1	WBGene00004258	pyc-1	2366	2385	PAO_1980	1	21	-14.33	GCUGGAGCUGAUGUGGUCGA&UCGAUCCUCCUUGGCUCCACC	(.(((((((((.(.((((((&)))).)).).))))))))).)
Y37E3.9.1	WBGene00004014	phb-1	138	158	PAO_1980	2	20	-13.46	GUGGAGUGAAAAACGAGGUCG&CGAUCCUCCUUGGCUCCAC	(((((((.((....(((((((&))).)))).)).)))))))
F22E10.3.1	WBGene00004008	pgp-14	3675	3694	PAO_1980	5	23	-18.18	AUGUAGGAGAAAAAGGAGGA&UCCUCCUUGGCUCCACCAU	(((..((((...((((((((&))))))))..))))..)))
C47A10.1.1	WBGene00004003	pgp-9	2610	2632	PAO_1980	3	23	-15.75	AUGAUGAAGUACCACGGAGGAUC&GAUCCUCCUUGGCUCCACCAU	(((.((.((..(((.((((((((&)))))))).))))).)).)))
C05A9.1a.1	WBGene00003999	pgp-5	2627	2639	PAO_1980	3	15	-14.08	GUGGAGGAGGAUU&GAUCCUCCUUGGC	((.((((((((((&)))))))))).))
F42E11.1b.1	WBGene00003998	pgp-4	43	56	PAO_1980	3	20	-14.34	GUGGAGCUGGGGUC&GAUCCUCCUUGGCUCCAC	((((((((((((((&))))))....))))))))
K08E7.9.1	WBGene00003995	pgp-1	2912	2928	PAO_1980	6	18	-15.23	GGAGGCUAUCAAGGAGG&CCUCCUUGGCUCC	((((....(((((((((&)))))))))))))
F54C1.7.1	WBGene00003934	pat-10	106	120	PAO_1980	1	16	-14.91	GGCUGAGGAUAUCGA&UCGAUCCUCCUUGGCU	(((((((((.(((((&)))))..)))))))))
M117.2a.3	WBGene00003920	par-5	717	732	PAO_1980	3	21	-12.98	GUUGGAGCUGAAGAUC&GAUCCUCCUUGGCUCCACC	(.(((((((((.((((&)))).))...))))))).)
C52B9.7a.1	WBGene00003907	paf-2	562	584	PAO_1980	3	22	-13.46	UGGUGGAACAGCCGAUCAAGAUC&GAUCCUCCUUGGCUCCACCA	(((((((...(((((....((((&))))....))))))))))))
K11C4.4.1	WBGene00003844	odc-1	980	1001	PAO_1980	1	23	-13.53	GUGGUGGAUUUCCAGGAGCCGA&UCGAUCCUCCUUGGCUCCACCAU	((((((((...(((((((.(((&)))...))))).)).))))))))
C15H11.3.1	WBGene00003834	nxf-1	163	175	PAO_1980	3	15	-14.82	GUCGUGGAGGAUC&GAUCCUCCUUGGC	((((.((((((((&)))))))).))))
VC5.5.1	WBGene00003725	nhr-135	731	743	PAO_1980	1	12	-12.55	AAGGAGGAAGCGG&UCGAUCCUCCUU	((((((((..(((&))).))))))))
H12C20.3a.1	WBGene00003658	nhr-68	1002	1023	PAO_1980	1	23	-12.86	AUGGUACAGAAGGACGGGUUGG&UCGAUCCUCCUUGGCUCCACCAU	(((((..(((((((.(((((((&))))))))))))..))..)))))
ZC155.1.1	WBGene00003588	nex-1	505	517	PAO_1980	4	16	-13.04	GGCCAAGGAUGAU&AUCCUCCUUGGCU	(((((((((.(((&))).)))))))))
F57C12.4.1	WBGene00003408	mrp-2	2207	2216	PAO_1980	3	12	-16	AAGGAGGAUC&GAUCCUCCUU	((((((((((&))))))))))
C05D11.11a.1	WBGene00003214	mel-32	339	354	PAO_1980	3	16	-14.02	AGCCAAGUGGGGAGUC&GAUCCUCCUUGGCU	(((((((.(((((.((&))))))))))))))
C02A12.4.1	WBGene00003096	lys-7	638	653	PAO_1980	7	21	-16.44	GGUGGAGUCACUGGAG&CUCCUUGGCUCCACC	((((((((((..((((&)))).))))))))))
F58B3.1.1	WBGene00003093	lys-4	632	641	PAO_1980	1	10	-13.42	GGAGGAUGGA&UCGAUCCUCC	(((((((.((&)).)))))))
W02D3.5.1	WBGene00002258	lbp-6	79	95	PAO_1980	1	21	-14.44	GGUUGGAGUUGGAUUGA&UCGAUCCUCCUUGGCUCCACC	((.((((((((((((((&))))))).....)))))))))
F40F4.2.1	WBGene00002254	lbp-2	565	584	PAO_1980	5	21	-12.52	GAGGGAGAAUCCAAGGAAGA&UCCUCCUUGGCUCCACC	(..((((...(((((((.((&)).)))))))))))..)
C25A1.7.1	WBGene00002153	iars-2	2181	2205	PAO_1980	1	22	-13.32	UGGAGGCUGUCAAGGAUUUGAUGGA&UCGAUCCUCCUUGGCUCCACCA	(((.((..((((((((...(((.((&)).))).)))))))).)).)))
F57B9.6a.1	WBGene00002083	inf-1	153	168	PAO_1980	5	19	-20.23	UGGAGCUCAAGGAGGA&UCCUCCUUGGCUCCA	((((((.(((((((((&)))))))))))))))
F37B4.2.1	WBGene00002055	ifc-1	327	346	PAO_1980	1	17	-14.22	GGGCUAGAGGGAGAGAUCGA&UCGAUCCUCCUUGGCUC	(((((((..((((.((((((&)))))))))))))))))
C12C8.1.1	WBGene00002026	hsp-70	997	1009	PAO_1980	1	19	-11.48	UGGAGCCGGUUGA&UCGAUCCUCCUUGGCUCCA	(((((((((((((&))))))......)))))))
Y22D7AL.5a.1	WBGene00002025	hsp-60	1356	1371	PAO_1980	3	18	-19.49	GCAGCCAACGAGGAUC&GAUCCUCCUUGGCUCC	(.((((((.(((((((&))))))).)))))).)
Y46H3A.3a.1	WBGene00002016	hsp-16.2	272	279	PAO_1980	7	14	-10.76	CCAAGGAG&CUCCUUGG	((((((((&))))))))
E04A4.4a.1	WBGene00001983	hoe-1	1347	1362	PAO_1980	7	22	-12.99	UGGAUGCGCCGAGGAG&CUCCUUGGCUCCACCA	(((..(.(((((((((&))))))))).)..)))
Y50E8A.16.1	WBGene00001817	haf-7	735	761	PAO_1980	1	23	-12.77	AUGAUGCAGUUUCAAAGGAGGAGAAGG&UCGAUCCUCCUUGGCUCCACCAU	(((.((.((((...((((((((...((&))..)))))))))))).)).)))
F11G11.2.1	WBGene00001755	gst-7	92	109	PAO_1980	2	20	-17.35	GUGGAGCUGGAGAGAUUG&CGAUCCUCCUUGGCUCCAC	((((((((((((.(((((&)))))))))..))))))))
C05E4.9a.1	WBGene00001564	icl-1	1679	1707	PAO_1980	3	23	-16.32	AUGGAAGGGAGCCGAGAUUCCAAGGGAUU&GAUCCUCCUUGGCUCCACCAU	((((...(((((((((.......((((((&)))))).))))))))).))))
K10D2.6.1	WBGene00001262	emb-8	581	596	PAO_1980	3	19	-17.26	UGGAGCCAAGAGAAUC&GAUCCUCCUUGGCUCCA	((((((((((((.(((&))).))).)))))))))
Y105E8A.4.1	WBGene00001156	ech-7	187	208	PAO_1980	2	18	-10.47	GGAGCCGAUAUCAAGGAGAUGG&CGAUCCUCCUUGGCUCC	((((((((......((((((.(&).))).)))))))))))
F56B3.5.1	WBGene00001154	ech-5	307	320	PAO_1980	6	17	-11.55	GAGCCAGCAGGAGG&CCUCCUUGGCUC	(((((((..(((((&))))))))))))
F49E8.5.1	WBGene00000996	dif-1	485	493	PAO_1980	5	13	-13.07	CAAGGAGGA&UCCUCCUUG	(((((((((&)))))))))
C45B11.3.1	WBGene00000981	dhs-18	120	130	PAO_1980	11	21	-11.87	GACGGAGCCAA&UUGGCUCCACC	(..((((((((&))))))))..)
R05D8.8.1	WBGene00000977	dhs-14	473	486	PAO_1980	3	16	-15.13	AGCCAAGGAGCAUU&GAUCCUCCUUGGCU	((((((((((.(((&))).))))))))))
C17G10.8.1	WBGene00000970	dhs-6	148	162	PAO_1980	10	23	-11.69	GUGGUGGCAGCAAAG&CUUGGCUCCACCAU	(((((((.(((.(((&))).))))))))))
F40E10.3.1	WBGene00000822	csq-1	809	835	PAO_1980	1	19	-14.7	UGGAGAGAUCCCGAAGAGGAGGAGAGA&UCGAUCCUCCUUGGCUCCA	(((((..........((((((((..((&))..))))))))..)))))
W07B8.5.1	WBGene00000785	cpr-5	537	552	PAO_1980	6	23	-17.14	AUGGUUGCGAAGGAGG&CCUCCUUGGCUCCACCAU	(((((.((.(((((((&))))))).))...)))))
F44C4.3.1	WBGene00000784	cpr-4	483	498	PAO_1980	4	18	-16.47	GGAUGCGAGGGAGGAU&AUCCUCCUUGGCUCC	(((.((.(((((((((&))))))))).)))))
C52E4.1.1	WBGene00000781	cpr-1	524	540	PAO_1980	4	19	-17.03	UGGAUGUGAAGGAGGAU&AUCCUCCUUGGCUCCA	((((.((.(((((((((&))))))))).))))))
F49D11.8.1	WBGene00000780	cpn-4	314	327	PAO_1980	5	18	-17.28	GGAGUCAAGGAUGA&UCCUCCUUGGCUCC	(((((((((((.((&)).)))))))))))
F14H8.6b.1	WBGene00000562	cng-1	1999	2012	PAO_1980	3	15	-15.57	GUCAAGGAAGGAUU&GAUCCUCCUUGGC	((((((((.(((((&)))))))))))))
K01C8.10.1	WBGene00000379	cct-4	1274	1293	PAO_1980	1	21	-17.4	GGUGGAGCUCCAGAGAUGGA&UCGAUCCUCCUUGGCUCCACC	(((((((((...(((((.((&)).))).))...)))))))))
C34E10.6.2	WBGene00000229	atp-2	1566	1579	PAO_1980	1	13	-16	CAAGGAGGAAUCGA&UCGAUCCUCCUUG	((((((((.(((((&)))))))))))))
F26D10.9a.1	WBGene00000224	atgp-1	1648	1671	PAO_1980	1	19	-15.22	UGGAGAUAAGGAGCAGAAGAUCGA&UCGAUCCUCCUUGGCUCCA	(((((.(((((((.....((((((&))))))))))))).)))))
ZK455.4.1	WBGene00000212	asm-2	670	685	PAO_1980	1	16	-15.67	AGCCAAGGAGCCCCGA&UCGAUCCUCCUUGGCU	((((((((((...(((&)))...))))))))))
F29G9.3.1	WBGene00000159	aps-1	459	465	PAO_1980	3	9	-9.85	GAGGAUC&GAUCCUC	(((((((&)))))))
F54D8.3a.1	WBGene00000107	alh-1	1138	1160	PAO_1980	3	22	-18.62	UGGAGGAGCCAAACACGGAGAUC&GAUCCUCCUUGGCUCCACCA	(((.((((((((....(((((((&)))).))))))))))).)))
