# Supplementary material for: Interspecies RNA Interactome of Pathogen and Host in a Heritable Defensive Strategy
Source: Front Microbiol. 2021 Jul 21;12:649858. doi: 10.3389/fmicb.2021.649858 (PMC8334366; doi:10.3389/fmicb.2021.649858)
Supplement: Supplementary File 2 — List of regulatory motifs predicted to be targeted by induced and constitutive sRNAs by RegRNA 2.0. [file Data_Sheet_2.xlsx]

## Sheet: Motifs of sRNAs of interaction
Bacterial Id	Motif type	Motif name	Position	Lenght	Target	Organism	Motif sequence	Bacteria full sequence	Similarity (functional sequences)	Match length (functional sequences)
>PAO_1343	RNA editing sites	RNA C-to-U editing site	13 ~ 13	1	C-to-U	not reported	c	CAGGATAGAGGTCTGCAAAACCCCGCCCAAAAGGCGG
	functional RNA sequences	FR387904/transfer_RNA_(tRNA) _GCA_(Cys/C)_Cysteine	1~37	37	tRNA	not reported	caggatagaggtctgcaaaaccccgcccaaaaggcgg		0.305785
>PAO_1976	exon splicing enhancer (ESE)	srp40-exonic splicing enhancer	25 ~ 30	6	SRp40	unknown	actggg	ACGGTTACCACGGAGTGATTCATGACTGGGGTGAAGTCG
	exon splicing enhancer (ESE)	srp40 - exonic splicing enhancer	9 ~ 15	7	SRp40	unknown	cacggag
	exon splicing enhancer (ESE)	sc35 - exonic splicing enhancer	3 ~ 11	9	SC35	unknown	ggttaccac
	intron splicing enhancer (ISE)	agrin y, exon 28	5 ~ 10	6	AGRIN	Mus musculus, mouse	ttacca
	intron splicing enhancer (ISE)	thyroid hormone receptor, exon 9	29 ~ 34	6	Thyroid Hormone Receptor	Rattus sp., rat	gggtga
	intron splicing enhancer (ISE)	ß-tropomyosin, exon 6b	27 ~ 33	7	β-tropomyosin	Gallus gallus, chicken	tggggtg
	RNA editing sites	RNA C-to-U editing site	28 ~ -28	1	C-to-U	not reported	c
>PAO_1980	exon splicing enhancer (ESE)	mvm ns2	18~23	6	NS2	Unknown	caccat	TCGATCCTCCTTGGCTCCACCAT
>PAO_2097	exon splicing enhancer (ESE)	gh exon 5	41~46	6	GH	Bos taurus, bovine	otro	TGGAGCGGGCGAAGGGAATCGAACCCTCGTCATGAGCTTGGGAAGCTCAGGTAATGCCATTATACGACGCCCGCTC
	intron splicing enhancer (ISE)	gh-1 intron 3	8 ~ 17	10	GH-1	Homo sapiens, human	ggcgaaggga
	intron splicing enhancer (ISE)	ctnt exon 5	35 ~ 41	7	cTNT	Homo sapiens, human	agcttgg
>PAO_2678	none				N/A			GGAGAGGTGGCCGAGTGGCCGAAGGCGCT
>PAO_5310	exon splicing enhancer (ESE)	asf/sf2 - exonic splicing enhancer	2 ~ 9	8	ASF/SF2	Unknown	cgcaggtt	TCGCAGGTTCGAGTCCTGCCGGGTGCGCCAT
	intron splicing enhancer (ISE)	thyroid hormone receptor exon 9	21 ~ 26	6	Thyroid Hormone Receptor	Rattus sp., rat	gggtgc
>PAO_5313	exon splicing enhancer (ESE)	mvm ns2	36~41	6	NS2	Unknown	caccac	GCCGCAAGGCGTGAGAGTTCGAGTCTCTCCGTCCGCACCAC
	exon splicing enhancer (ESE)	srp55-exonic splicing enhancer	28~34	7	SRp55	Unknown	tccgtcc
	exon splicing silencer (ESS)	fibronectin eda exon	5~10	6	fibronectin EDA	Homo sapiens, human	caaggc
	intron splicing enhancer (ISE)	ighg2 cgamma2 (immunoglobulin heavy chain subclass g2 - cgamma2 gene) - intron 1	11~16	6	IGHG2	Homo sapiens, human	gtgaga
	intron splicing silencer (ISS)	c-src, exon n1	25~30	6	c-Src	Mus musculus, mouse	ctctcc
	functional RNA sequences	FR256740/transfer_RNA_(tRNA),_TAG_(Leu/L)_Leucine	1~37	37	tRNA	not reported	gccgcaaggcgtgagagttcgagtctctccgtccgca		0.45122	37
		FR324733/transfer_RNA_(tRNA),_TAG_(Leu/L)_Leucine	1~37	37	tRNA	not reported	gccgcaaggcgtgagagttcgagtctctccgtccgca		0.439024	36
		FR041224/transfer_RNA_(tRNA),_TAG_(Leu/L)_Leucine	1~37	37	tRNA	not reported	gccgcaaggcgtgagagttcgagtctctccgtccgca		0.426829	35
		FR014348/transfer_RNA_(tRNA),_TAG_(Leu/L)_Leucine	1~37	37	tRNA	not reported	gccgcaaggcgtgagagttcgagtctctccgtccgca		0.426829	35
		FR286270/transfer_RNA_(tRNA),_TAG_(Leu/L)_Leucine	1~37	37	tRNA	not reported	gccgcaaggcgtgagagttcgagtctctccgtccgca		0.414634	34
		FR159888/transfer_RNA_(tRNA),_TAG_(Leu/L)_Leucine	1~37	37	tRNA	not reported	gccgcaaggcgtgagagttcgagtctctccgtccgca		0.414634	34
		FR036776/transfer_RNA_(tRNA),_TAG_(Leu/L)_Leucine	1~37	37	tRNA	not reported	gccgcaaggcgtgagagttcgagtctctccgtccgca		0.414634	34
		FR402971/transfer_RNA_(tRNA),_CAA_(Leu/L)_Leucine	1~37	37	tRNA	not reported	gccgcaaggcgtgagagttcgagtctctccgtccgca		0.414634	34
		FR096715/transfer_RNA_(tRNA),_GAG_(Leu/L)_Leucine	2~37	36	tRNA	not reported	ccgcaaggcgtgagagttcgagtctctccgtccgca		0.378049	31
>PAO_5440	exon splicing enhancer (ESE)	GH exon 5	25~30	6	GH	Bos taurus, bovine	ggaagc	TCCACGTGCAGGATGGCGGGACCCGGAAGCTGGACGTGGCGCGCTT
	intron splicing enhancer (ISE)	ctnt, exon 5	28~34	7	cTNT	Homo sapiens, human	agctgga
>PAO_6246	exon splicing enhancer (ESE)	bpv-1 late exon 2	49~55	7	BPV-1 late	Unknown	gaagaac	ACAGGGAGAACCATGGTGAACGGAGAAAACAAGATCGTCCTGGTCCTCGAAGAACACGCCGACCAGCTCT
	exon splicing enhancer (ESE)	gh-1, exon 3	49~55	7	GH-1	Homo sapiens, human	gaagaac
	exon splicing enhancer (ESE)	srp40-exonic splicing enhancer	1~6	6	SRp40	Unknown	acaggg
	exon splicing silencer (ESS)	fn eda	12~17	6	Fn-EDA	Gallus gallus, chicken	catggt
	Transcriptional regulatory motif	lin-14	52 ~ 57	6	Lin-14		gaacac
	RNA editing sites	RNA C-to-U editing site	36 ~ 36	1	RNA		c
>PAO_7207	exon splicing enhancer (ESE)	srp40 - exonic splicing enhancer	44~50	7	SRp40	Unknown	tgcagct	CTATCCCCCGGCCGATGGAAATCGGCCACTCCAGCCCCGCGATTGCAGCTCCTGGTCGCGGGGCTTTTTTATG
	exon splicing enhancer (ESE)	asf/sf2 - exonic splicing enhancer	9~16	8	ASF/SF2	Unknown	cggccgat
	intron splicing enhancer (ISE)	gh-1 intron 3	54~63	10	GH-1	Homo sapiens, human	ggtcgcgggg
>PAO_8219	exon splicing enhancer (ESE)	mvm ns2	22~27	6	NS2	Unknown	caccaa	GTGACTTTCTCCTATGGTGGTCACCAAAGCCCCGGGGGCCGCTCATCCCTCCGGGGCTTTCCCC
	exon splicing enhancer (ESE)	sc35 - exonic splicing enhancer	19~27	9	SC35	Unknown	ggtcaccaa
>PAO_8334	intron splicing enhancer (ISE)	agrin y, exon 28	28~33	6	AGRIN	Mus musculus, mouse	ttaccg	GCGTCCCCTAGGGGACTCGAACCCCTGTTACCGCCGTG
	intron splicing enhancer (ISE)	β-tropomyosin exon, 6b	11~16	6	β-tropomyosin	Gallus gallus, chicken	ggggac
>PAO_8684	intron splicing silencer (ISS)	sex lethal, exon 3	53~61	9	Sxl	Drosophila melanogaster, fruit fly	tttttttta	CTTTGTTCCACTCCTAATGGTCTTGACCCGGATTCATCCCCCAGAACCCGGGTTTTTTTTA
	intron splicing silencer (ISS)	transformer, exon 2	53~61	9	Transformer	Drosophila melanogaster, fruit fly	tttttttta
	untranslated region (UTR) motifs	Terminal Oligopyrimidine Tract (TOP)	1~5	5	TOP	ctttg
	RNA editing sites	RNA C-to-U editing site	8 ~ 8	1	C-to-U	c
	functional RNA sequences	FR407323/Pseudomonas_small_noncoding_RNA_(sRNA)_P16	1~51	51	sRNA_P16		ctttgttccactcctaatggtcttgacccggattcatcccccagaacccgg		0.258883	51
		FR407048/Pseudomonas_small_noncoding_RNA_(sRNA)_P16	1~51	51	sRNA_P16		ctttgttccactcctaatggtcttgacccggattcatcccccagaacccgg		0.241026	47
		FR406197/Pseudomonas_small_noncoding_RNA_(sRNA)_P16	10~51	42	sRNA_P16		actcctaatggtcttgacccggattcatcccccagaacccgg		0.206186	40
		FR406892/Pseudomonas_small_noncoding_RNA_(sRNA)_P16	1~51	51	sRNA_P16		ctttgttccactcctaatggtcttgacccggattcatcccccagaacccgg		0.234694	46
		FR406397/Pseudomonas_small_noncoding_RNA_(sRNA)_P16	1~51	51	sRNA_P16		ctttgttccactcctaatggtcttgacccggattcatcccccagaacccgg		0.229592	45
	functional RNA sequences	FR147672/transfer_RNA_(tRNA),_GTG_(His/H)_Histidine	1~42	42	tRNA		ctttgttccactcctaatggtcttgacccggattcatccccc		0.187817	37
>PAO_8985	exon splicing enhancer (ESE)	asf/ sf2-exonic splicing enhancer	42~49	8	ASF/SF2	Unknown	gggacgag	ACAAAACGGAGCGTAGCGCAGCTTGGTAGCGCGTCTCGTTCGGGACGAGAAGGTCGCTGGTTCGAATCCAGTCGCTCCGACCAT
	exon splicing enhancer (ESE)	srp40 - exonic splicing enhancer	17~23	7	SRp40	Unknown	cgcagct
	exon splicing enhancer (ESE)	srp40 - exonic splicing enhancer	30~36	7	SRp40	Unknown	cgcgtct
	intron splicing enhancer (ISE)	ctnt, exon 5	20~26	7	cTNT	Homo sapiens, human	agcttgg
	functional RNA sequences	FR263438/transfer_RNA_(tRNA),_CGG_(Pro/P)_Proline	7~80	74	tRNA		cggagcgtagcgcagcttggtagcgcgtctcgttcgggacgagaaggtcgctggttcgaatccagtcgctccga		1	74
		FR200974/transfer_RNA_(tRNA),_CGG_(Pro/P)_Proline	7~81	75	tRNA		cggagcgtagcgcagcttggtagcgcgtctcgttcgggacgagaaggtcgctggttcgaatccagtcgctccgac		0.986667	74
		FR110979/transfer_RNA_(tRNA),_CGG_(Pro/P)_Proline	7~80	74	tRNA		cggagcgtagcgcagcttggtagcgcgtctcgttcgggacgagaaggtcgctggttcgaatccagtcgctccga		0.905405	67
		FR391963/transfer_RNA_(tRNA),_CGG_(Pro/P)_Proline	16~69	54	tRNA		gcgcagcttggtagcgcgtctcgttcgggacgagaaggtcgctggttcgaatcc		0.675676	50
		FR191277/transfer_RNA_(tRNA),_CGG_(Pro/P)_Proline	16~69	54	tRNA		gcgcagcttggtagcgcgtctcgttcgggacgagaaggtcgctggttcgaatcc		0.662162	49
		FR255942/transfer_RNA_(tRNA),_CGG_(Pro/P)_Proline	16~69	54	tRNA		gcgcagcttggtagcgcgtctcgttcgggacgagaaggtcgctggttcgaatcc		0.662162	49
		FR228316/transfer_RNA_(tRNA),_CGG_(Pro/P)_Proline	13~73	61	tRNA		gtagcgcagcttggtagcgcgtctcgttcgggacgagaaggtcgctggttcgaatccagtc		0.72973	54
		FR171251/transfer_RNA_(tRNA),_CGG_(Pro/P)_Proline	13~69	57	tRNA		gtagcgcagcttggtagcgcgtctcgttcgggacgagaaggtcgctggttcgaatccagtc		0.689189	51
		FR355530/transfer_RNA_(tRNA),_CGG_(Pro/P)_Proline	13~73	61	tRNA		gtagcgcagcttggtagcgcgtctcgttcgggacgagaaggtcgctggttcgaatccagtc		0.72973	54
		FR405611/transfer_RNA_(tRNA),_CGG_(Pro/P)_Proline	7~69	63	tRNA		cggagcgtagcgcagcttggtagcgcgtctcgttcgggacgagaaggtcgctggttcgaatcc		0.743243	55
		FR298926/transfer_RNA_(tRNA),_CGG_(Pro/P)_Proline	16~69	54	tRNA		gcgcagcttggtagcgcgtctcgttcgggacgagaaggtcgctggttcgaatcc		0.648649	48
		FR194398/transfer_RNA_(tRNA),_CGG_(Pro/P)_Proline	16~69	54	tRNA		gcgcagcttggtagcgcgtctcgttcgggacgagaaggtcgctggttcgaatcc		0.648649	48
		FR004277/transfer_RNA_(tRNA),_CGG_(Pro/P)_Proline	16~69	54	tRNA		gcgcagcttggtagcgcgtctcgttcgggacgagaaggtcgctggttcgaatcc		0.648649	48
		FR019088/transfer_RNA_(tRNA),_TGG_(Pro/P)_Proline	13~69	57	tRNA		gtagcgcagcttggtagcgcgtctcgttcgggacgagaaggtcgctggttcgaatcc		0.675676	50
		FR275106/transfer_RNA_(tRNA),_CGG_(Pro/P)_Proline	14~69	56	tRNA		tagcgcagcttggtagcgcgtctcgttcgggacgagaaggtcgctggttcgaatcc		0.662162	49
		FR033580/transfer_RNA_(tRNA),_TGG_(Pro/P)_Proline	7~69	63	tRNA		cggagcgtagcgcagcttggtagcgcgtctcgttcgggacgagaaggtcgctggttcgaatcc		0.72973	54
		FR353782/transfer_RNA_(tRNA),_CGG_(Pro/P)_Proline	11~69	59	tRNA		gcgtagcgcagcttggtagcgcgtctcgttcgggacgagaaggtcgctggttcgaatcc		0.689189	51
		FR334848/transfer_RNA_(tRNA),_TGG_(Pro/P)_Proline	16~69	54	tRNA		gcgcagcttggtagcgcgtctcgttcgggacgagaaggtcgctggttcgaatcc		0.635135	47
		FR232317/transfer_RNA_(tRNA),_CGG_(Pro/P)_Proline	7~80	74	tRNA		cggagcgtagcgcagcttggtagcgcgtctcgttcgggacgagaaggtcgctggttcgaatccagtcgctccga		0.837838	62
		FR080045/transfer_RNA_(tRNA),_CGG_(Pro/P)_Proline	16~69	54	tRNA		gcgcagcttggtagcgcgtctcgttcgggacgagaaggtcgctggttcgaatcc		0.635135	47
		FR071850/transfer_RNA_(tRNA),_TGG_(Pro/P)_Proline	16~69	54	tRNA		gcgcagcttggtagcgcgtctcgttcgggacgagaaggtcgctggttcgaatcc		0.635135	47
		FR357833/transfer_RNA_(tRNA),_GGG_(Pro/P)_Proline	7~80	74	tRNA		cggagcgtagcgcagcttggtagcgcgtctcgttcgggacgagaaggtcgctggttcgaatccagtcgctccga		0.837838	62
		FR314822/transfer_RNA_(tRNA),_TGG_(Pro/P)_Proline	13~69	57	tRNA		gtagcgcagcttggtagcgcgtctcgttcgggacgagaaggtcgctggttcgaatcc		0.662162	49
		FR266990/transfer_RNA_(tRNA),_CGG_(Pro/P)_Proline	13~69	57	tRNA		gtagcgcagcttggtagcgcgtctcgttcgggacgagaaggtcgctggttcgaatcc		0.662162	49
		FR260879/transfer_RNA_(tRNA),_CGG_(Pro/P)_Proline	16~48	33	tRNA		gcgcagcttggtagcgcgtctcgttcgggacga		0.418919	31
		FR175126/transfer_RNA_(tRNA),_GGG_(Pro/P)_Proline	13~69	57	tRNA		gtagcgcagcttggtagcgcgtctcgttcgggacgagaaggtcgctggttcgaatcc		0.662162	49
		FR341831/transfer_RNA_(tRNA),_TGG_(Pro/P)_Proline	13~69	57	tRNA		gtagcgcagcttggtagcgcgtctcgttcgggacgagaaggtcgctggttcgaatcc		0.662162	49
		FR296104/transfer_RNA_(tRNA),_TGG_(Pro/P)_Proline	14~69	56	tRNA		tagcgcagcttggtagcgcgtctcgttcgggacgagaaggtcgctggttcgaatcc		0.648649	48
		FR280014/transfer_RNA_(tRNA),_CGC_(Ala/A)_Alanine	7~69	63	tRNA		cggagcgtagcgcagcttggtagcgcgtctcgttcgggacgagaaggtcgctggttcgaatcc		0.716216	53
		FR067813/transfer_RNA_(tRNA),_CGG_(Pro/P)_Proline	23~69	47	tRNA		ttggtagcgcgtctcgttcgggacgagaaggtcgctggttcgaatcc		0.561644	41
		FR015695/transfer_RNA_(tRNA),_GGG_(Pro/P)_Proline	11~69	59	tRNA		gcgtagcgcagcttggtagcgcgtctcgttcgggacgagaaggtcgctggttcgaatcc		0.675676	50
		FR277860/transfer_RNA_(tRNA),_TGG_(Pro/P)_Proline	16~69	54	tRNA		gcgcagcttggtagcgcgtctcgttcgggacgagaaggtcgctggttcgaatcc		0.621622	46
		FR237171/transfer_RNA_(tRNA),_TGG_(Pro/P)_Proline	16~69	54	tRNA		gcgcagcttggtagcgcgtctcgttcgggacgagaaggtcgctggttcgaatcc		0.621622	46
		FR193664/transfer_RNA_(tRNA),_CGC_(Ala/A)_Alanine	16~69	54	tRNA		gcgcagcttggtagcgcgtctcgttcgggacgagaaggtcgctggttcgaatcc		0.621622	46
		FR149085/transfer_RNA_(tRNA),_GGG_(Pro/P)_Proline	24~69	46	tRNA		tggtagcgcgtctcgttcgggacgagaaggtcgctggttcgaatcc		0.540541	40
		FR127113/transfer_RNA_(tRNA),_CCG_(Arg/R)_Arginine	14~55	42	tRNA		tagcgcagcttggtagcgcgtctcgttcgggacgagaaggtc		0.520548	38
		FR071919/transfer_RNA_(tRNA),_CGG_(Pro/P)_Proline	14~69	56	tRNA		tagcgcagcttggtagcgcgtctcgttcgggacgagaaggtcgctggttcgaatcc		0.635135	47
		FR013461/transfer_RNA_(tRNA),_CGG_(Pro/P)_Proline	11~56	46	tRNA		gcgtagcgcagcttggtagcgcgtctcgttcgggacgagaaggtcg		0.540541	40
		FR012748/transfer_RNA_(tRNA),_TGG_(Pro/P)_Proline	16~69	54	tRNA		gcgcagcttggtagcgcgtctcgttcgggacgagaaggtcgctggttcgaatcc		0.621622	46
		FR346490/transfer_RNA_(tRNA),_TGG_(Pro/P)_Proline	13~69	57	tRNA		gtagcgcagcttggtagcgcgtctcgttcgggacgagaaggtcgctggttcgaatcc		0.648649	48
		FR272524/transfer_RNA_(tRNA),_TGG_(Pro/P)_Proline	13~69	57	tRNA		gtagcgcagcttggtagcgcgtctcgttcgggacgagaaggtcgctggttcgaatcc		0.648649	48
		FR180783/transfer_RNA_(tRNA),_TGG_(Pro/P)_Proline	13~69	57	tRNA		gtagcgcagcttggtagcgcgtctcgttcgggacgagaaggtcgctggttcgaatcc		0.648649	48
		FR018557/transfer_RNA_(tRNA),_GGG_(Pro/P)_Proline	13~69	57	tRNA		gtagcgcagcttggtagcgcgtctcgttcgggacgagaaggtcgctggttcgaatcc		0.648649	48
		FR155903/transfer_RNA_(tRNA),_TGG_(Pro/P)_Proline	37~80	44	tRNA		cgttcgggacgagaaggtcgctggttcgaatccagtcgctccga		0.513514	38
		FR247110/transfer_RNA_(tRNA),_CAC_(Val/V)_Valine	11~69	59	tRNA		gcgtagcgcagcttggtagcgcgtctcgttcgggacgagaaggtcgctggttcgaatcc		0.662162	49
		FR180370/transfer_RNA_(tRNA),_GTA_(Tyr/Y)_Tyrosine	7~69	63	tRNA		cggagcgtagcgcagcttggtagcgcgtctcgttcgggacgagaaggtcgctggttcgaatcc		0.702703	52
		FR173555/transfer_RNA_(tRNA),_GTA_(Tyr/Y)_Tyrosine	7~69	63	tRNA		cggagcgtagcgcagcttggtagcgcgtctcgttcgggacgagaaggtcgctggttcgaatcc		0.702703	52
		FR119575/transfer_RNA_(tRNA),_CAT_(Met/M)_Methionine	11~81	71	tRNA		gcgtagcgcagcttggtagcgcgtctcgttcgggacgagaaggtcgctggttcgaatccagtcgctccgac		0.786667	59
		FR021268/transfer_RNA_(tRNA),_TGG_(Pro/P)_Proline	7~69	63	tRNA		cggagcgtagcgcagcttggtagcgcgtctcgttcgggacgagaaggtcgctggttcgaatcc		0.702703	52
		FR370066/transfer_RNA_(tRNA),_TTT_(Lys/K)_Lysine	7~68	62	tRNA		cggagcgtagcgcagcttggtagcgcgtctcgttcgggacgagaaggtcgctggttcgaatc		0.689189	51
		FR156565/transfer_RNA_(tRNA),_GGG_(Pro/P)_Proline	16~69	54	tRNA		gcgcagcttggtagcgcgtctcgttcgggacgagaaggtcgctggttcgaatcc		0.608108	45
		FR013412/transfer_RNA_(tRNA),_GGG_(Pro/P)_Proline	23~56	34	tRNA		ttggtagcgcgtctcgttcgggacgagaaggtcg		0.410959	30
		FR401318/transfer_RNA_(tRNA),_GAT_(Ile/I)_Isoleucine	16~69	54	tRNA		gcgcagcttggtagcgcgtctcgttcgggacgagaaggtcgctggttcgaatcc		0.608108	45
		FR307590/transfer_RNA_(tRNA),_TTG_(Gln/Q)_Glutamine	13~69	57	tRNA		gtagcgcagcttggtagcgcgtctcgttcgggacgagaaggtcgctggttcgaatcc		0.635135	47
>PAO_9524	exon splicing enhancer (ESE)	sc35 - exonic splicing enhancer	10~17	8	SC35	Homo sapiens, human	gatccgtt	ATGGGTAACGATCCGTTCGATCAACTCCGACTTGGTCATGGTTTTCCCTTCTTTTTCAAGCGGCTAGATCAGCTCA			-8.2
	exon splicing enhancer (ESE)	sc35 - exonic splicing enhancer	10~17	8	SC35	Homo sapiens, human	gatccgtt				-12.8
	exon splicing silencer (ESS)	fn eda	37~42	6	Fn-EDA	Gallus gallus, chicken	catggt
	intron splicing enhancer (ISE)	cftr, intron 9	49~56	8	CFTR	Homo sapiens, human	ttcttttt
	RNA editing sites	RNA C-to-U editing site	46 ~ 46	1	C-to-U		c
>PAO_9937	exon splicing enhancer (ESE)	srp40-exonic splicing enhancer	42~47	6	SRp40	Unknown	acaggc
	exon splicing enhancer (ESE)	srp40-exonic splicing enhancer	12~17	6	SRp40	Unknown	acggga
	exon splicing enhancer (ESE)	sc35 - exonic splicing enhancer	29~36	8	SC35	Homo sapiens, human	gacccccg
	exon splicing enhancer (ESE)	sc35 - exonic splicing enhancer	29~36	8	SC35	Homo sapiens, human	gacccccg
	exon splicing enhancer (ESE)	srp40 - exonic splicing enhancer	4~10	7	SRp40	Unknown	cgcagcg
	exon splicing enhancer (ESE)	sc35 - exonic splicing enhancer	29~37	9	SC35	Unknown	gacccccgg
	exon splicing enhancer (ESE)	asf/sf2 - exonic splicing enhancer	6~13	8	ASF/SF2	Unknown	cagcggac
	RNA editing sites	RNA C-to-U editing site	-65 ~ -65	1	C-to-U		g
>PAO_10341	none				N/A			AAGGCCCTCCCGGGTAACCCCGGGA
>PAO_10576	exon splicing enhancer (ESE)	asf/ sf2-exonic splicing enhancer	26~33	8	ASF/SF2	Unknown	cggaggac	CCTGATACTCCTGGGCCCTCTCAGTCGGAGGACATACCAGCACACACATG
		asf/sf2 - exonic splicing enhancer	26~33	8	ASF/SF2	Unknown	cggaggac
	intron splicing enhancer (ISE)	β-tropomyosin, exon 6b	12~17	6	β-tropomyosin	Gallus gallus, chicken	tgggcc
	intron splicing silencer (ISS)	c-src, exon n1	18~23	6	c-Src	Mus musculus, mouse	ctctca
>PAO_11728	exon splicing enhancer (ESE)	mvm ns2	43~48	6	NS2	Unknown	caccat	CCGTTTCTGGCGACAGAGTGAGAGTTCGAGTCTCTCCCGAGGCACCAT
	exon splicing enhancer (ESE)	srp55 - exonic splicing enhancer	4~11	8	SRp55	Unknown	tttctggc
	intron splicing enhancer (ISE)	ighg2 cgamma2 (immunoglobulin heavy chain subclass g2 - cgamma2 gene) - intron 1	18~23	6	IGHG2	Homo sapiens, human	gtgaga
	intron splicing silencer (ISS)	c-src, exon n1	32~37	6	c-Src	Mus musculus, mouse	ctctcc
	functional RNA sequences	FR402971/transfer_RNA_(tRNA),_CAA_(Leu/L)_Leucine	1~44	44	tRNA		ccgtttctggcgacagagtgagagttcgagtctctcccgaggca		0.52381	44
>PAO_13084	exon splicing enhancer (ESE)	mvm ns2	13~18	6	NS2	Unknown	caccat	AGTCAAACTGCCCACCATACACTGTCCTCGATCCGGATTACGGACCAGAGTTAGAACCT
	exon splicing enhancer (ESE)	srp40-exonic splicing enhancer	7~12	6	SRp40	Unknown	actgcc
	exon splicing enhancer (ESE)	srp55-exonic splicing enhancer	32~38	7	SRp55	Unknown	tccggat
	exon splicing enhancer (ESE)	srp40 - exonic splicing enhancer	39~45	7	SRp40	Unknown	tacggac
>PAO_13118	exon splicing silencer (ESS)	fibronectin eda exon	10~15	6	fibronectin EDA	Homo sapiens, human	caagga	TGGTGGAGCCAAGGAGGATCGAA
>PAO_13122	RNA editing sites	RNA C-to-U editing site	11 ~ 11	1	C-to-U		c	GACTTCACCCCAGTCATGAATCACTCCGTGGTAACCGTC
>PAO_13124	exon splicing enhancer (ESE)	sc35 - exonic splicing enhancer	26~34	9	SC35	Unknown	gattactag	TATTCACCGTGACATTCTGATTCACGATTACTAGCGA
	RNA editing sites	RNA C-to-U editing site	23 ~ 23	1	C-to-U		c
>PAO_14303	none				N/A
>PAO_14309	exon splicing enhancer (ESE)	sc35 - exonic splicing enhancer	14~21	8	SC35	Homo sapiens, human	gattcgcg	TCCGGTGTTGCTGGATTCGCGTCTCAGAGG
		sc35 - exonic splicing enhancer	14~21	8	SC35	Homo sapiens, human	gattcgcg
	exon splicing enhancer (ESE)	srp40 - exonic splicing enhancer	18~24	7	SRp40	Unknown	cgcgtct
>PAO_14838	none				N/A			TCGAATCCAGCCGCCCCTGCCAT
>PAO_14912	exon splicing enhancer (ESE)	srp40-exonic splicing enhancer	24~29	6	SRp40	Unknown	actggt	GTCAAGCCTCACGGGCAATTAGTACTGGTTAGCTCAACGCCTCACAAC
	exon splicing enhancer (ESE)	srp40-exonic splicing enhancer	11~16	6	SRp40	Unknown	acgggc
	exon splicing enhancer (ESE)	srp55 - exonic splicing enhancer	7~14	8	SRp55	Unknown	cctcacgg
	untranslated region (UTR) motifs	Musashi binding element (MBE)	18~23	6	MBE	Metazoa	attagt
>PAO_14955	exon splicing silencer (ESS)	fibronectin eda exon	10~15	6	fibronectin EDA	Homo sapiens, human	caagga	TGGTGGAGCCAAGGAGGATCGAA
>PAO_14959	RNA editing sites	RNA C-to-U editing site	11 ~ 11	1	C-to-U		c	GACTTCACCCCAGTCATGAATCACTCCGTGGTAACCGT
>PAO_14961	exon splicing enhancer (ESE)	sc35 - exonic splicing enhancer	26~34	9	SC35	Unknown	gattactag	TATTCACCGTGACATTCTGATTCACGATTACTAGCGAT
	RNA editing sites	RNA C-to-U editing site	23 ~ 23	1	C-to-U		c
>PAO_15143	exon splicing enhancer (ESE)	srp40 - exonic splicing enhancer	23~29	7	SRp40	Unknown	cacgtaa	ACGACGAAGACAATAAAAACAACACGTAACGACTCCAGCACAACAAAAACAAAATCGCGGAG
	exon splicing enhancer (ESE)	srp40 - exonic splicing enhancer	56~62	7	SRp40	Unknown	cgcggag
	untranslated region (UTR) motifs	Polyadenylation Signal (PAS)	42~62	21	PAS	Eukaryota	aacaaaaacaaaatcgcggag
>PAO_15144	exon splicing enhancer (ESE)	fibronectin eda exon	43~51	9	fibronectin EDA	Homo sapiens, human	gaagaagaa	TTGGAGAGGAGTTGCTGTCGGGACCCGTCCCGCAGCCAGTCGGAAGAAGAATAAAACTGC
	exon splicing enhancer (ESE)	gh exon 5	42~47	6	GH	Bos taurus, bovine	ggaaga
	exon splicing enhancer (ESE)	hiv-1 tat exon 3	43~52	10	hiv-1 tat	Unknown	gaagaagaat
	exon splicing enhancer (ESE)	beta-tm exon 5, 6	43~52	10	Beta-TM	Rattus sp., rat	gaagaagaat
	exon splicing enhancer (ESE)	sr protein 9g8 exon 3	43~52	10	SR protein 9g8	Homo sapiens, human	gaagaagaat
	exon splicing enhancer (ESE)	xi collagen, exon 6b	43~51	9	XI collagen	Mus musculus, mouse	gaagaagaa
	exon splicing enhancer (ESE)	bpv-1 late exon 2	43~49	7	BPV-1 late	Unknown	gaagaag
	exon splicing enhancer (ESE)	bpv-1 late exon 2	46~52	7	BPV-1 late	Unknown	gaagaat
	exon splicing enhancer (ESE)	gh-1, exon 3	43~49	7	GH-1	Homo sapiens, human	gaagaag
	exon splicing enhancer (ESE)	gh-1, exon 3	46~52	7	GH-1	Homo sapiens, human	gaagaat
	exon splicing enhancer (ESE)	asf/ sf2-exonic splicing enhancer	4~11	8	ASF/SF2	Unknown	gagaggag
	exon splicing enhancer (ESE)	srp40-exonic splicing enhancer	56~61	6	SRp40	Unknown	actgc
	exon splicing enhancer (ESE)	sc35 - exonic splicing enhancer	22~29	8	SC35	Homo sapiens, human	gacccgtc
	exon splicing enhancer (ESE)	sc35 - exonic splicing enhancer	22~29	8	SC35	Homo sapiens, human	gacccgtc
	exon splicing enhancer (ESE)	srp40 - exonic splicing enhancer	31~37	7	SRp40	Unknown	cgcagcc
	untranslated region (UTR) motifs	Polyadenylation Signal (PAS)	50~60	11	PAS	Eukaryota	aataaaactgc
	RNA editing sites	RNA C-to-U editing site	-43 ~ -43	1	C-to-U		t
>PAO_15146	RNA editing sites	RNA C-to-U editing site	5 ~ 5	1	C-to-U		c	AATCCGTTTGCTATTGAACTCCCAGCCTGGGAGATATCCCTGAAGCGAC
>PAO_15147	exon splicing enhancer (ESE)	srp40-exonic splicing enhancer	11~16	6	SRp40	Unknown	actggc	CCCTGAAGCGACTGGCTCAAGGGACGGGTCGACAAACAAAAA
	exon splicing enhancer (ESE)	srp40-exonic splicing enhancer	24~29	6	SRp40	Unknown	acgggt
	exon splicing silencer (ESS)	fibronectin eda exon	18~23	6	fibronectin EDA	Homo sapiens, human	caaggg
	untranslated region (UTR) motifs	Terminal Oligopyrimidine Tract (TOP)	1~5	5	TOP	ccctg
	untranslated region (UTR) motifs	Polyadenylation Signal (PAS)	35~42	8	PAS	aacaaaaa
>PAO_15266	exon splicing enhancer (ESE)	srp40-exonic splicing enhancer	54~59	6	SRp40	Unknown	actgct	GGGGCTGGATTTGAACCAACGACCTTCGGGTTATGAGCCCGACGAGCTACCAGACTGCTCCACCCCGCGTCAAAGC
	exon splicing enhancer (ESE)	srp40 - exonic splicing enhancer	66~72	7	SRp40	Unknown	cgcgtca
	intron splicing enhancer (ISE)	β-tropomyosin, exon 6b	1~8	8	β-tropomyosin	Gallus gallus, chicken	ggggctgg
	intron splicing enhancer (ISE)	ctnt, exon 5	3~9	7	cTNT	Homo sapiens, human	ggctgga
>PAO_16316	exon splicing enhancer (ESE)	srp55-exonic splicing enhancer	24~30	7	SRp55	Unknown	tgcggcg	CTACTTCGCCTGTCACCCGCTCATGCGGCGAGTTTTC
	exon splicing enhancer (ESE)	srp40 - exonic splicing enhancer	24~30	7	SRp40	Unknown	tgcggcg
>PAO_16745	exon splicing enhancer (ESE)	mvm ns2	71~76	6	NS2	Unknown	caccat	CCCAGGTAGCTCAGTTGGTAGAGCAGGGGATTGAAAATCCCCGTGTCGGCGGTTCGATTCCGTCCCTGGGCACCATGAATACG
	exon splicing enhancer (ESE)	srp55-exonic splicing enhancer	59~65	7	SRp55	Unknown	tccgtcc
	exon splicing enhancer (ESE)	asf/sf2 - exonic splicing enhancer	47~54	8	ASF/SF2	Unknown	cggcggtt
	exon splicing silencer (ESS)	bpv-1 late rna	20~28	9	BPV-1 late	Unknown	agagcaggg
	intron splicing enhancer (ISE)	gh1:growth hormone 1, intron3	26~32	7	GH-1	Homo sapiens, human	ggggatt
	intron splicing enhancer (ISE)	β-tropomyosin, exon 6b	67~72	6	β-tropomyosin	Gallus gallus, chicken	tgggca
	intron splicing enhancer (ISE)	β-tropomyosin exon, 6b	26~31	6	β-tropomyosin	Gallus gallus, chicken	ggggat
	functional RNA sequences	FR275677/transfer_RNA_(tRNA),_GAA_(Phe/F)_Phenylalanine	1~72	72	tRNA		cccaggtagctcagttggtagagcaggggattgaaaatccccgtgtcggcggttcgattccgtccctgggca		0.986301	72
		FR312457/transfer_RNA_(tRNA),_GAA_(Phe/F)_Phenylalanine	2~69	68	tRNA		ccaggtagctcagttggtagagcaggggattgaaaatccccgtgtcggcggttcgattccgtccctgg		0.917808	67
		FR294116/transfer_RNA_(tRNA),_GAA_(Phe/F)_Phenylalanine	2~69	68	tRNA		ccaggtagctcagttggtagagcaggggattgaaaatccccgtgtcggcggttcgattccgtccctgg		0.90411	66
		FR193418/transfer_RNA_(tRNA),_GAA_(Phe/F)_Phenylalanine	1~72	72	tRNA		cccaggtagctcagttggtagagcaggggattgaaaatccccgtgtcggcggttcgattccgtccctgggca		0.945205	69
		FR234410/transfer_RNA_(tRNA),_GAA_(Phe/F)_Phenylalanine	6~65	60	tRNA		gtagctcagttggtagagcaggggattgaaaatccccgtgtcggcggttcgattccgtcc		0.821918	60
		FR398400/transfer_RNA_(tRNA),_GAA_(Phe/F)_Phenylalanine	5~66	62	tRNA		ggtagctcagttggtagagcaggggattgaaaatccccgtgtcggcggttcgattccgtccc		0.808219	59
		FR168248/transfer_RNA_(tRNA),_GAA_(Phe/F)_Phenylalanine	1~72	72	tRNA		cccaggtagctcagttggtagagcaggggattgaaaatccccgtgtcggcggttcgattccgtccctgggca		0.90411	66
		FR157472/transfer_RNA_(tRNA),_GAA_(Phe/F)_Phenylalanine	1~72	72	tRNA		cccaggtagctcagttggtagagcaggggattgaaaatccccgtgtcggcggttcgattccgtccctgggca		0.90411	66
		FR143603/transfer_RNA_(tRNA),_GAA_(Phe/F)_Phenylalanine	1~72	72	tRNA		cccaggtagctcagttggtagagcaggggattgaaaatccccgtgtcggcggttcgattccgtccctgggca		0.90411	66
		FR073569/transfer_RNA_(tRNA),_GAA_(Phe/F)_Phenylalanine	1~72	72	tRNA		cccaggtagctcagttggtagagcaggggattgaaaatccccgtgtcggcggttcgattccgtccctgggca		0.90411	66
		FR399302/transfer_RNA_(tRNA),_GAA_(Phe/F)_Phenylalanine	7~62	56	tRNA		tagctcagttggtagagcaggggattgaaaatccccgtgtcggcggttcgattccg		0.739726	54
		FR320587/transfer_RNA_(tRNA),_GAA_(Phe/F)_Phenylalanine	5~66	62	tRNA		ggtagctcagttggtagagcaggggattgaaaatccccgtgtcggcggttcgattccgtccc		0.794521	58
		FR287752/transfer_RNA_(tRNA),_GAA_(Phe/F)_Phenylalanine	5~62	58	tRNA		ggtagctcagttggtagagcaggggattgaaaatccccgtgtcggcggttcgattccg		0.753425	55
		FR245415/transfer_RNA_(tRNA),_GAA_(Phe/F)_Phenylalanine	5~66	62	tRNA		ggtagctcagttggtagagcaggggattgaaaatccccgtgtcggcggttcgattccgtccc		0.794521	58
		FR167655/transfer_RNA_(tRNA),_GAA_(Phe/F)_Phenylalanine	5~66	62	tRNA		ggtagctcagttggtagagcaggggattgaaaatccccgtgtcggcggttcgattccgtccc		0.794521	58
		FR379961/transfer_RNA_(tRNA),_GAA_(Phe/F)_Phenylalanine	5~66	62	tRNA		ggtagctcagttggtagagcaggggattgaaaatccccgtgtcggcggttcgattccgtccc		0.794521	58
		FR211480/transfer_RNA_(tRNA),_GAA_(Phe/F)_Phenylalanine	1~72	72	tRNA		cccaggtagctcagttggtagagcaggggattgaaaatccccgtgtcggcggttcgattccgtccctgggca		0.890411	65
		FR159579/transfer_RNA_(tRNA),_GAA_(Phe/F)_Phenylalanine	2~69	68	tRNA		ccaggtagctcagttggtagagcaggggattgaaaatccccgtgtcggcggttcgattccgtccctgg		0.849315	62
		FR073753/transfer_RNA_(tRNA),_GAA_(Phe/F)_Phenylalanine	7~62	56	tRNA		tagctcagttggtagagcaggggattgaaaatccccgtgtcggcggttcgattccg		0.726027	53
		FR368465/transfer_RNA_(tRNA),_GAA_(Phe/F)_Phenylalanine	7~62	56	tRNA		tagctcagttggtagagcaggggattgaaaatccccgtgtcggcggttcgattccg		0.726027	53
		FR331793/transfer_RNA_(tRNA),_GAA_(Phe/F)_Phenylalanine	5~66	62	tRNA		ggtagctcagttggtagagcaggggattgaaaatccccgtgtcggcggttcgattccgtccc		0.780822	57
		FR209779/transfer_RNA_(tRNA),_GAA_(Phe/F)_Phenylalanine	4~49	46	tRNA		aggtagctcagttggtagagcaggggattgaaaatccccgtgtcgg		0.616438	45
		FR202607/transfer_RNA_(tRNA),_GAA_(Phe/F)_Phenylalanine	5~62	58	tRNA		ggtagctcagttggtagagcaggggattgaaaatccccgtgtcggcggttcgattccg		0.739726	54
		FR268781/transfer_RNA_(tRNA),_GAA_(Phe/F)_Phenylalanine	5~66	62	tRNA		ggtagctcagttggtagagcaggggattgaaaatccccgtgtcggcggttcgattccgtccc		0.780822	57
		FR193703/transfer_RNA_(tRNA),_GAA_(Phe/F)_Phenylalanine	2~62	61	tRNA		ccaggtagctcagttggtagagcaggggattgaaaatccccgtgtcggcggttcgattccg		0.767123	56
		FR021137/transfer_RNA_(tRNA),_GAA_(Phe/F)_Phenylalanine	2~62	61	tRNA		ccaggtagctcagttggtagagcaggggattgaaaatccccgtgtcggcggttcgattccg		0.767123	56
		FR405479/transfer_RNA_(tRNA),_GAA_(Phe/F)_Phenylalanine	4~72	69	tRNA		aggtagctcagttggtagagcaggggattgaaaatccccgtgtcggcggttcgattccgtccctgggca		0.849315	62
		FR391802/transfer_RNA_(tRNA),_GAA_(Phe/F)_Phenylalanine	7~62	56	tRNA		tagctcagttggtagagcaggggattgaaaatccccgtgtcggcggttcgattccg		0.712329	52
		FR348538/transfer_RNA_(tRNA),_GAA_(Phe/F)_Phenylalanine	7~62	56	tRNA		tagctcagttggtagagcaggggattgaaaatccccgtgtcggcggttcgattccg		0.712329	52
		FR306563/transfer_RNA_(tRNA),_GAA_(Phe/F)_Phenylalanine	1~72	72	tRNA		cccaggtagctcagttggtagagcaggggattgaaaatccccgtgtcggcggttcgattccgtccctgggca		0.876712	64
		FR288069/transfer_RNA_(tRNA),_GAA_(Phe/F)_Phenylalanine	7~62	56	tRNA		tagctcagttggtagagcaggggattgaaaatccccgtgtcggcggttcgattccg		0.712329	52
		FR266036/transfer_RNA_(tRNA),_GAA_(Phe/F)_Phenylalanine	5~64	60	tRNA		ggtagctcagttggtagagcaggggattgaaaatccccgtgtcggcggttcgattccgtc		0.753425	55
		FR201461/transfer_RNA_(tRNA),_GAA_(Phe/F)_Phenylalanine	7~62	56	tRNA		tagctcagttggtagagcaggggattgaaaatccccgtgtcggcggttcgattccg		0.712329	52
		FR165945/transfer_RNA_(tRNA),_GAA_(Phe/F)_Phenylalanine	1~72	72	tRNA		cccaggtagctcagttggtagagcaggggattgaaaatccccgtgtcggcggttcgattccgtccctgggca		0.876712	64
		FR149403/transfer_RNA_(tRNA),_GAA_(Phe/F)_Phenylalanine	7~62	56	tRNA		tagctcagttggtagagcaggggattgaaaatccccgtgtcggcggttcgattccg		0.712329	52
		FR106764/transfer_RNA_(tRNA),_GAA_(Phe/F)_Phenylalanine	7~62	56	tRNA		tagctcagttggtagagcaggggattgaaaatccccgtgtcggcggttcgattccg		0.712329	52
		FR026412/transfer_RNA_(tRNA),_GAA_(Phe/F)_Phenylalanine	7~62	56	tRNA		tagctcagttggtagagcaggggattgaaaatccccgtgtcggcggttcg		0.712329	52
		FR388544/transfer_RNA_(tRNA),_GAA_(Phe/F)_Phenylalanine	7~62	56	tRNA		tagctcagttggtagagcaggggattgaaaatccccgtgtcggcggttcgattccg		0.712329	52
		FR348688/transfer_RNA_(tRNA),_GAA_(Phe/F)_Phenylalanine	5~66	62	tRNA		ggtagctcagttggtagagcaggggattgaaaatccccgtgtcggcggttcgattccgtccc		0.767123	56
		FR328679/transfer_RNA_(tRNA),_GAA_(Phe/F)_Phenylalanine	5~66	62	tRNA		ggtagctcagttggtagagcaggggattgaaaatccccgtgtcggcggttcgattccgtccc		0.767123	56
		FR132170/transfer_RNA_(tRNA),_GAA_(Phe/F)_Phenylalanine	5~66	62	tRNA		ggtagctcagttggtagagcaggggattgaaaatccccgtgtcggcggttcgattccgtccc		0.767123	56
		FR032234/transfer_RNA_(tRNA),_GAA_(Phe/F)_Phenylalanine	5~66	62	tRNA		ggtagctcagttggtagagcaggggattgaaaatccccgtgtcggcggttcgattccgtccc		0.767123	56
		FR011606/transfer_RNA_(tRNA),_GAA_(Phe/F)_Phenylalanine	5~62	58	tRNA		ggtagctcagttggtagagcaggggattgaaaatccccgtgtcggcggttcgattccg		0.726027	53
		FR335287/transfer_RNA_(tRNA),_GAA_(Phe/F)_Phenylalanine	7~64	58	tRNA		tagctcagttggtagagcaggggattgaaaatccccgtgtcggcggttcgattccgtc		0.726027	53
		FR227671/transfer_RNA_(tRNA),_GAA_(Phe/F)_Phenylalanine	7~55	49	tRNA		tagctcagttggtagagcaggggattgaaaatccccgtgtcggcggttc		0.630137	46
		FR105119/transfer_RNA_(tRNA),_GAA_(Phe/F)_Phenylalanine	7~55	49	tRNA		tagctcagttggtagagcaggggattgaaaatccccgtgtcggcggttc		0.630137	46
		FR281055/transfer_RNA_(tRNA),_GAA_(Phe/F)_Phenylalanine	7~47	41	tRNA		tagctcagttggtagagcaggggattgaaaatccccgtgtc		0.547945	40
		FR277276/transfer_RNA_(tRNA),_GAA_(Phe/F)_Phenylalanine	7~62	56	tRNA		tagctcagttggtagagcaggggattgaaaatccccgtgtcggcggttcgattccg		0.69863	51
		FR261920/transfer_RNA_(tRNA),_GAA_(Phe/F)_Phenylalanine	1~72	72	tRNA		cccaggtagctcagttggtagagcaggggattgaaaatccccgtgtcggcggttcgattccgtccctgggca		0.863014	63
		FR260254/transfer_RNA_(tRNA),_GAA_(Phe/F)_Phenylalanine	7~62	56	tRNA		tagctcagttggtagagcaggggattgaaaatccccgtgtcggcggttcgattccg		0.69863	51
		FR214643/transfer_RNA_(tRNA),_GAA_(Phe/F)_Phenylalanine	7~62	56	tRNA		tagctcagttggtagagcaggggattgaaaatccccgtgtcggcggttcgattccg		0.69863	51
		FR178553/transfer_RNA_(tRNA),_GAA_(Phe/F)_Phenylalanine	5~64	60	tRNA		ggtagctcagttggtagagcaggggattgaaaatccccgtgtcggcggttcgattccgtc		0.739726	54
		FR101010/transfer_RNA_(tRNA),_GAA_(Phe/F)_Phenylalanine	7~62	56	tRNA		tagctcagttggtagagcaggggattgaaaatccccgtgtcggcggttcgattccg		0.69863	51
		FR133584/transfer_RNA_(tRNA),_GAA_(Phe/F)_Phenylalanine	17~72	56	tRNA		ggtagagcaggggattgaaaatccccgtgtcggcggttcgattccgtccctgggca		0.708333	51
		FR278267/transfer_RNA_(tRNA),_GAA_(Phe/F)_Phenylalanine	4~62	59	tRNA		aggtagctcagttggtagagcaggggattgaaaatccccgtgtcggcggttcgattccg		0.726027	53
		FR257886/transfer_RNA_(tRNA),_GAA_(Phe/F)_Phenylalanine	7~62	56	tRNA		tagctcagttggtagagcaggggattgaaaatccccgtgtcggcggttcgattccg		0.684932	50
		FR101576/transfer_RNA_(tRNA),_GAA_(Phe/F)_Phenylalanine	1~62	62	tRNA		cccaggtagctcagttggtagagcaggggattgaaaatccccgtgtcggcggttcgattccg		0.753425	55
		FR074052/transfer_RNA_(tRNA),_GAA_(Phe/F)_Phenylalanine	7~64	58	tRNA		tagctcagttggtagagcaggggattgaaaatccccgtgtcggcggttcgattccgtc		0.712329	52
		FR044160/transfer_RNA_(tRNA),_GAA_(Phe/F)_Phenylalanine	5~62	58	tRNA		ggtagctcagttggtagagcaggggattgaaaatccccgtgtcggcggttcgattccg		0.712329	52
		FR349380/transfer_RNA_(tRNA),_GAA_(Phe/F)_Phenylalanine	5~66	62	tRNA		ggtagctcagttggtagagcaggggattgaaaatccccgtgtcggcggttcgattccgtccc		0.753425	55
		FR348597/transfer_RNA_(tRNA),_GAA_(Phe/F)_Phenylalanine	6~62	57	tRNA		gtagctcagttggtagagcaggggattgaaaatccccgtgtcggcggttcgattccg		0.69863	51
		FR339126/transfer_RNA_(tRNA),_GAA_(Phe/F)_Phenylalanine	7~47	41	tRNA		tagctcagttggtagagcaggggattgaaaatccccgtgtc		0.534247	39
		FR309290/transfer_RNA_(tRNA),_GAA_(Phe/F)_Phenylalanine	7~47	41	tRNA		tagctcagttggtagagcaggggattgaaaatccccgtgtc		0.534247	39
		FR253663/transfer_RNA_(tRNA),_GAA_(Phe/F)_Phenylalanine	7~47	41	tRNA		tagctcagttggtagagcaggggattgaaaatccccgtgtc		0.534247	39
		FR237575/transfer_RNA_(tRNA),_GAA_(Phe/F)_Phenylalanine	7~47	41	tRNA		tagctcagttggtagagcaggggattgaaaatccccgtgtc		0.534247	39
		FR181245/transfer_RNA_(tRNA),_GAA_(Phe/F)_Phenylalanine	7~47	41	tRNA		tagctcagttggtagagcaggggattgaaaatccccgtgtc		0.534247	39
		FR383359/transfer_RNA_(tRNA),_GAA_(Phe/F)_Phenylalanine	7~47	41	tRNA		tagctcagttggtagagcaggggattgaaaatccccgtgtc		0.534247	39
		FR365027/transfer_RNA_(tRNA),_GAA_(Phe/F)_Phenylalanine	7~62	56	tRNA		tagctcagttggtagagcaggggattgaaaatccccgtgtcggcggttcgattccg		0.684932	50
		FR344288/transfer_RNA_(tRNA),_GAA_(Phe/F)_Phenylalanine	6~65	60	tRNA		gtagctcagttggtagagcaggggattgaaaatccccgtgtcggcggttcgattccgtcc		0.726027	53
		FR287692/transfer_RNA_(tRNA),_GAA_(Phe/F)_Phenylalanine	5~64	60	tRNA		ggtagctcagttggtagagcaggggattgaaaatccccgtgtcggcggttcgattccgtc		0.726027	53
		FR216514/transfer_RNA_(tRNA),_GAA_(Phe/F)_Phenylalanine	6~65	60	tRNA		gtagctcagttggtagagcaggggattgaaaatccccgtgtcggcggttcgattccgtcc		0.726027	53
		FR056856/transfer_RNA_(tRNA),_GAA_(Phe/F)_Phenylalanine	6~65	60	tRNA		gtagctcagttggtagagcaggggattgaaaatccccgtgtcggcggttcgattccgtcc		0.726027	53
		FR337756/transfer_RNA_(tRNA),_GAA_(Phe/F)_Phenylalanine	7~62	56	tRNA		tagctcagttggtagagcaggggattgaaaatccccgtgtcggcggttcgattccg		0.684932	50
		FR309918/transfer_RNA_(tRNA),_GAA_(Phe/F)_Phenylalanine	7~61	55	tRNA		tagctcagttggtagagcaggggattgaaaatccccgtgtcggcggttcgattcc		0.671233	49
		FR252501/transfer_RNA_(tRNA),_GAA_(Phe/F)_Phenylalanine	7~61	55	tRNA		tagctcagttggtagagcaggggattgaaaatccccgtgtcggcggttcgattcc		0.671233	49
		FR200235/transfer_RNA_(tRNA),_GAA_(Phe/F)_Phenylalanine	7~57	51	tRNA		tagctcagttggtagagcaggggattgaaaatccccgtgtcggcggttcga		0.630137	46
		FR186934/transfer_RNA_(tRNA),_GAA_(Phe/F)_Phenylalanine	6~60	55	tRNA		gtagctcagttggtagagcaggggattgaaaatccccgtgtcggcggttcgattc		0.671233	49
		FR102496/transfer_RNA_(tRNA),_GAA_(Phe/F)_Phenylalanine	7~62	56	tRNA		tagctcagttggtagagcaggggattgaaaatccccgtgtcggcggttcgattccg		0.671233	49
		FR089529/transfer_RNA_(tRNA),_GAA_(Phe/F)_Phenylalanine	7~61	55	tRNA		tagctcagttggtagagcaggggattgaaaatccccgtgtcggcggttcgattcc		0.671233	49
		FR358374/transfer_RNA_(tRNA),_GAA_(Phe/F)_Phenylalanine	7~61	55	tRNA		tagctcagttggtagagcaggggattgaaaatccccgtgtcggcggttcgattcc		0.671233	49
		FR274475/transfer_RNA_(tRNA),_GAA_(Phe/F)_Phenylalanine	7~48	42	tRNA		tagctcagttggtagagcaggggattgaaaatccccgtgtcg		0.534247	39
		FR140408/transfer_RNA_(tRNA),_GAA_(Phe/F)_Phenylalanine	5~66	62	tRNA		ggtagctcagttggtagagcaggggattgaaaatccccgtgtcggcggttcgattccgtccc		0.739726	54
		FR047065/transfer_RNA_(tRNA),_GTT_(Asn/N)_Asparagine	1~62	62	tRNA		cccaggtagctcagttggtagagcaggggattgaaaatccccgtgtcggcggttcgattccg		0.739726	54
		FR017310/transfer_RNA_(tRNA),_GAA_(Phe/F)_Phenylalanine	5~66	62	tRNA		ggtagctcagttggtagagcaggggattgaaaatccccgtgtcggcggttcgattccgtccc		0.739726	54
		FR393903/transfer_RNA_(tRNA),_GAA_(Phe/F)_Phenylalanine	7~48	42	tRNA		tagctcagttggtagagcaggggattgaaaatccccgtgtcg		0.534247	39
		FR383018/transfer_RNA_(tRNA),_GAA_(Phe/F)_Phenylalanine	7~47	41	tRNA		tagctcagttggtagagcaggggattgaaaatccccgtgtc		0.520548	38
		FR363954/transfer_RNA_(tRNA),_GAA_(Phe/F)_Phenylalanine	7~47	41	tRNA		tagctcagttggtagagcaggggattgaaaatccccgtgtc		0.520548	38
		FR362596/transfer_RNA_(tRNA),_GAA_(Phe/F)_Phenylalanine	7~47	41	tRNA		tagctcagttggtagagcaggggattgaaaatccccgtgtc		0.520548	38
		FR337129/transfer_RNA_(tRNA),_GAA_(Phe/F)_Phenylalanine	7~47	41	tRNA		tagctcagttggtagagcaggggattgaaaatccccgtgtc		0.520548	38
		FR332442/transfer_RNA_(tRNA),_GAA_(Phe/F)_Phenylalanine	7~47	41	tRNA		tagctcagttggtagagcaggggattgaaaatccccgtgtc		0.520548	38
		FR332187/transfer_RNA_(tRNA),_GAA_(Phe/F)_Phenylalanine	7~47	41	tRNA		tagctcagttggtagagcaggggattgaaaatccccgtgtc		0.520548	38
		FR325064/transfer_RNA_(tRNA),_GAA_(Phe/F)_Phenylalanine	7~47	41	tRNA		tagctcagttggtagagcaggggattgaaaatccccgtgtc		0.520548	38
		FR301145/transfer_RNA_(tRNA),_GAA_(Phe/F)_Phenylalanine	7~47	41	tRNA		tagctcagttggtagagcaggggattgaaaatccccgtgtc		0.520548	38
		FR271614/transfer_RNA_(tRNA),_GAA_(Phe/F)_Phenylalanine	7~47	41	tRNA		tagctcagttggtagagcaggggattgaaaatccccgtgtc		0.520548	38
		FR248381/transfer_RNA_(tRNA),_GAA_(Phe/F)_Phenylalanine	7~47	41	tRNA		tagctcagttggtagagcaggggattgaaaatccccgtgtc		0.520548	38
		FR240782/transfer_RNA_(tRNA),_GAA_(Phe/F)_Phenylalanine	7~47	41	tRNA		tagctcagttggtagagcaggggattgaaaatccccgtgtc		0.520548	38
		FR216842/transfer_RNA_(tRNA),_GAA_(Phe/F)_Phenylalanine	7~47	41	tRNA		tagctcagttggtagagcaggggattgaaaatccccgtgtc		0.520548	38
		FR163127/transfer_RNA_(tRNA),_GAA_(Phe/F)_Phenylalanine	7~47	41	tRNA		tagctcagttggtagagcaggggattgaaaatccccgtgtc		0.520548	38
		FR162765/transfer_RNA_(tRNA),_GAA_(Phe/F)_Phenylalanine	7~47	41	tRNA		tagctcagttggtagagcaggggattgaaaatccccgtgtc		0.520548	38
		FR161325/transfer_RNA_(tRNA),_GAA_(Phe/F)_Phenylalanine	7~47	41	tRNA		tagctcagttggtagagcaggggattgaaaatccccgtgtc		0.527778	38
		FR156365/transfer_RNA_(tRNA),_GAA_(Phe/F)_Phenylalanine	7~47	41	tRNA		tagctcagttggtagagcaggggattgaaaatccccgtgtc		0.520548	38
		FR103328/transfer_RNA_(tRNA),_GAA_(Phe/F)_Phenylalanine	7~47	41	tRNA		tagctcagttggtagagcaggggattgaaaatccccgtgtc		0.520548	38
		FR079210/transfer_RNA_(tRNA),_GAA_(Phe/F)_Phenylalanine	7~47	41	tRNA		tagctcagttggtagagcaggggattgaaaatccccgtgtc		0.520548	38
		FR064600/transfer_RNA_(tRNA),_GAA_(Phe/F)_Phenylalanine	7~47	41	tRNA		tagctcagttggtagagcaggggattgaaaatccccgtgtc		0.520548	38
		FR043506/transfer_RNA_(tRNA),_GAA_(Phe/F)_Phenylalanine	7~47	41	tRNA		tagctcagttggtagagcaggggattgaaaatccccgtgtc		0.520548	38
		FR032293/transfer_RNA_(tRNA),_GAA_(Phe/F)_Phenylalanine	7~47	41	tRNA		tagctcagttggtagagcaggggattgaaaatccccgtgtc		0.520548	38
		FR018710/transfer_RNA_(tRNA),_GAA_(Phe/F)_Phenylalanine	7~47	41	tRNA		tagctcagttggtagagcaggggattgaaaatccccgtgtc		0.520548	38
		FR007831/transfer_RNA_(tRNA),_GAA_(Phe/F)_Phenylalanine	7~47	41	tRNA		tagctcagttggtagagcaggggattgaaaatccccgtgtc		0.520548	38
		FR003602/transfer_RNA_(tRNA),_GAA_(Phe/F)_Phenylalanine	7~47	41	tRNA		tagctcagttggtagagcaggggattgaaaatccccgtgtc		0.520548	38
		FR405707/transfer_RNA_(tRNA),_GAA_(Phe/F)_Phenylalanine	7~47	41	tRNA		tagctcagttggtagagcaggggattgaaaatccccgtgtc		0.520548	38
		FR404247/transfer_RNA_(tRNA),_GAA_(Phe/F)_Phenylalanine	5~60	56	tRNA		ggtagctcagttggtagagcaggggattgaaaatccccgtgtcggcggttcgattc		0.671233	49
		FR376577/transfer_RNA_(tRNA),_GAA_(Phe/F)_Phenylalanine	7~58	52	tRNA		tagctcagttggtagagcaggggattgaaaatccccgtgtcggcggttcgat		0.630137	46
		FR283447/transfer_RNA_(tRNA),_GAA_(Phe/F)_Phenylalanine	2~61	60	tRNA		ccaggtagctcagttggtagagcaggggattgaaaatccccgtgtcggcggttcgattcc		0.712329	52
		FR278614/transfer_RNA_(tRNA),_GAA_(Phe/F)_Phenylalanine	7~58	52	tRNA		tagctcagttggtagagcaggggattgaaaatccccgtgtcggcggttcgat		0.630137	46
		FR253412/transfer_RNA_(tRNA),_GAA_(Phe/F)_Phenylalanine	7~62	56	tRNA		tagctcagttggtagagcaggggattgaaaatccccgtgtcggcggttcgattccg		0.671233	49
		FR151858/transfer_RNA_(tRNA),_GAA_(Phe/F)_Phenylalanine	6~65	60	tRNA		gtagctcagttggtagagcaggggattgaaaatccccgtgtcggcggttcgattccgtcc		0.712329	52
		FR051766/transfer_RNA_(tRNA),_GAA_(Phe/F)_Phenylalanine	1~72	72	tRNA		cccaggtagctcagttggtagagcaggggattgaaaatccccgtgtcggcggttcgattccgtccctgggca		0.835616	61
		FR010305/transfer_RNA_(tRNA),_GAA_(Phe/F)_Phenylalanine	6~65	60	tRNA		gtagctcagttggtagagcaggggattgaaaatccccgtgtcggcggttcgattccgtcc		0.712329	52
		FR374439/transfer_RNA_(tRNA),_GAA_(Phe/F)_Phenylalanine	2~61	60	tRNA		ccaggtagctcagttggtagagcaggggattgaaaatccccgtgtcggcggttcgattcc		0.712329	52
		FR221713/transfer_RNA_(tRNA),_GAA_(Phe/F)_Phenylalanine	7~45	39	tRNA		tagctcagttggtagagcaggggattgaaaatccccgtg		0.493151	36
		FR192466/transfer_RNA_(tRNA),_GAA_(Phe/F)_Phenylalanine	7~57	51	tRNA		tagctcagttggtagagcaggggattgaaaatccccgtgtcggcggttcga		0.616438	45
		FR185948/transfer_RNA_(tRNA),_GAA_(Phe/F)_Phenylalanine	7~61	55	tRNA		tagctcagttggtagagcaggggattgaaaatccccgtgtcggcggttcgattcc		0.657534	48
		FR133618/transfer_RNA_(tRNA),_GAA_(Phe/F)_Phenylalanine	7~45	39	tRNA		tagctcagttggtagagcaggggattgaaaatccccgtg		0.493151	36
		FR040464/transfer_RNA_(tRNA),_GAA_(Phe/F)_Phenylalanine	7~61	55	tRNA		tagctcagttggtagagcaggggattgaaaatccccgtgtcggcggttcgattcc		0.657534	48
		FR029169/transfer_RNA_(tRNA),_GAA_(Phe/F)_Phenylalanine	7~61	55	tRNA		tagctcagttggtagagcaggggattgaaaatccccgtgtcggcggttcgattcc		0.657534	48
		FR004875/transfer_RNA_(tRNA),_GAA_(Phe/F)_Phenylalanine	7~61	55	tRNA		tagctcagttggtagagcaggggattgaaaatccccgtgtcggcggttcgattcc		0.657534	48
		FR402749/transfer_RNA_(tRNA),_GAA_(Phe/F)_Phenylalanine	6~40	35	tRNA		gtagctcagttggtagagcaggggattgaaaatcc		0.452055	33
		FR340656/transfer_RNA_(tRNA),_GAA_(Phe/F)_Phenylalanine	7~40	34	tRNA		tagctcagttggtagagcaggggattgaaaatcc		0.426667	32
		FR258756/transfer_RNA_(tRNA),_GAA_(Phe/F)_Phenylalanine	7~40	34	tRNA		tagctcagttggtagagcaggggattgaaaatcc		0.438356	32
		FR219852/transfer_RNA_(tRNA),_GAA_(Phe/F)_Phenylalanine	7~40	34	tRNA		tagctcagttggtagagcaggggattgaaaatcc		0.438356	32
		FR193555/transfer_RNA_(tRNA),_GAA_(Phe/F)_Phenylalanine	7~40	34	tRNA		tagctcagttggtagagcaggggattgaaaatcc		0.457143	32
		FR172303/transfer_RNA_(tRNA),_GAA_(Phe/F)_Phenylalanine	7~40	34	tRNA		tagctcagttggtagagcaggggattgaaaatcc		0.426667	32
		FR092072/transfer_RNA_(tRNA),_GAA_(Phe/F)_Phenylalanine	10~47	38	tRNA		ctcagttggtagagcaggggattgaaaatccccgtgtc		0.486111	35
		FR087163/transfer_RNA_(tRNA),_GAA_(Phe/F)_Phenylalanine	7~40	34	tRNA		tagctcagttggtagagcaggggattgaaaatcc		0.438356	32
		FR369750/transfer_RNA_(tRNA),_GAA_(Phe/F)_Phenylalanine	7~40	34	tRNA		tagctcagttggtagagcaggggattgaaaatcc		0.438356	32
		FR360593/transfer_RNA_(tRNA),_GAA_(Phe/F)_Phenylalanine	7~47	41	tRNA		tagctcagttggtagagcaggggattgaaaatccccgtgtc		0.506849	37
		FR313738/transfer_RNA_(tRNA),_GAA_(Phe/F)_Phenylalanine	5~57	53	tRNA		ggtagctcagttggtagagcaggggattgaaaatccccgtgtcggcggttcga		0.630137	46
		FR265428/transfer_RNA_(tRNA),_GAA_(Phe/F)_Phenylalanine	7~47	41	tRNA		tagctcagttggtagagcaggggattgaaaatccccgtgtc		0.506849	37
		FR264776/transfer_RNA_(tRNA),_GAA_(Phe/F)_Phenylalanine	11~47	37	tRNA		tcagttggtagagcaggggattgaaaatccccgtgtc		0.465753	34
		FR210306/transfer_RNA_(tRNA),_GAA_(Phe/F)_Phenylalanine	7~39	33	tRNA		tagctcagttggtagagcaggggattgaaaatc		0.413333	31
		FR181770/transfer_RNA_(tRNA),_GAA_(Phe/F)_Phenylalanine	7~47	41	tRNA		tagctcagttggtagagcaggggattgaaaatccccgtgtc		0.506849	37
		FR163770/transfer_RNA_(tRNA),_GAA_(Phe/F)_Phenylalanine	7~47	41	tRNA		tagctcagttggtagagcaggggattgaaaatccccgtgtc		0.506849	37
		FR141793/transfer_RNA_(tRNA),_GAA_(Phe/F)_Phenylalanine	7~47	41	tRNA		tagctcagttggtagagcaggggattgaaaatccccgtgtc		0.506849	37
		FR121540/transfer_RNA_(tRNA),_GAA_(Phe/F)_Phenylalanine	7~47	41	tRNA		tagctcagttggtagagcaggggattgaaaatccccgtgtc		0.506849	37
		FR050850/transfer_RNA_(tRNA),_GAA_(Phe/F)_Phenylalanine	7~39	33	tRNA		tagctcagttggtagagcaggggattgaaaatc		0.424658	31
		FR039307/transfer_RNA_(tRNA),_GAA_(Phe/F)_Phenylalanine	7~47	41	tRNA		tagctcagttggtagagcaggggattgaaaatccccgtgtc		0.506849	37
		FR313463/transfer_RNA_(tRNA),_GAA_(Phe/F)_Phenylalanine	6~62	57	tRNA		gtagctcagttggtagagcaggggattgaaaatccccgtgtcggcggttcgattccg		0.694444	50
		FR311580/transfer_RNA_(tRNA),_GAA_(Phe/F)_Phenylalanine	4~47	44	tRNA		aggtagctcagttggtagagcaggggattgaaaatccccgtgtc		0.534247	39
		FR287648/transfer_RNA_(tRNA),_GAA_(Phe/F)_Phenylalanine	6~57	52	tRNA		gtagctcagttggtagagcaggggattgaaaatccccgtgtcggcggttcga		0.616438	45
		FR111782/transfer_RNA_(tRNA),_GTG_(His/H)_Histidine	7~58	52	tRNA		tagctcagttggtagagcaggggattgaaaatccccgtgtcggcggttcgat		0.616438	45
		FR091384/transfer_RNA_(tRNA),_GAA_(Phe/F)_Phenylalanine	6~57	52	tRNA		gtagctcagttggtagagcaggggattgaaaatccccgtgtcggcggttcga		0.616438	45
		FR386112/transfer_RNA_(tRNA),_GAA_(Phe/F)_Phenylalanine	6~65	60	tRNA		gtagctcagttggtagagcaggggattgaaaatccccgtgtcggcggttcgattccgtcc		0.69863	51
		FR384278/transfer_RNA_(tRNA),_GAA_(Phe/F)_Phenylalanine	6~40	35	tRNA		gtagctcagttggtagagcaggggattgaaaatcc		0.438356	32
		FR369356/transfer_RNA_(tRNA),_GAA_(Phe/F)_Phenylalanine	7~61	55	tRNA		tagctcagttggtagagcaggggattgaaaatccccgtgtcggcggttcgattcc		0.643836	47
		FR366800/transfer_RNA_(tRNA),_GTT_(Asn/N)_Asparagine	7~61	55	tRNA		tagctcagttggtagagcaggggattgaaaatccccgtgtcggcggttcgattcc		0.643836	47
		FR044569/transfer_RNA_(tRNA),_GAA_(Phe/F)_Phenylalanine	7~57	51	tRNA		tagctcagttggtagagcaggggattgaaaatccccgtgtcggcggttcga		0.60274	44
		FR035174/transfer_RNA_(tRNA),_GAA_(Phe/F)_Phenylalanine	7~57	51	tRNA		tagctcagttggtagagcaggggattgaaaatccccgtgtcggcggttcga		0.60274	44
		FR306274/transfer_RNA_(tRNA),_TAA_(Leu/L)_Leucine	6~40	35	tRNA		gtagctcagttggtagagcaggggattgaaaatcc		0.438356	32
		FR305731/transfer_RNA_(tRNA),_CAT_(Met/M)_Methionine	7~40	34	tRNA		tagctcagttggtagagcaggggattgaaaatcc		0.413333	31
		FR275058/transfer_RNA_(tRNA),_GTT_(Asn/N)_Asparagine	7~40	34	tRNA		tagctcagttggtagagcaggggattgaaaatcc		0.424658	31
		FR228142/transfer_RNA_(tRNA),_GAA_(Phe/F)_Phenylalanine	7~40	34	tRNA		tagctcagttggtagagcaggggattgaaaatcc		0.424658	31
		FR215091/transfer_RNA_(tRNA),_TCT_(Arg/R)_Arginine	5~66	62	tRNA		ggtagctcagttggtagagcaggggattgaaaatccccgtgtcggcggttcgattccgtccc		0.712329	52
		FR111660/transfer_RNA_(tRNA),_GAA_(Phe/F)_Phenylalanine	7~40	34	tRNA		tagctcagttggtagagcaggggattgaaaatcc		0.424658	31
		FR108285/transfer_RNA_(tRNA),_GAA_(Phe/F)_Phenylalanine	7~40	34	tRNA		tagctcagttggtagagcaggggattgaaaatcc		0.424658	31
		FR070704/transfer_RNA_(tRNA),_ATT_(Asn/N)_Asparagine	7~40	34	tRNA		tagctcagttggtagagcaggggattgaaaatcc		0.424658	31
		FR066711/transfer_RNA_(tRNA),_GAA_(Phe/F)_Phenylalanine	7~50	44	tRNA		tagctcagttggtagagcaggggattgaaaatccccgtgtcggc		0.513158	39
		FR060099/transfer_RNA_(tRNA),_GAA_(Phe/F)_Phenylalanine	7~40	34	tRNA		tagctcagttggtagagcaggggattgaaaatcc		0.424658	31
		FR385649/transfer_RNA_(tRNA),_TCC_(Gly/G)_Glycine	7~40	34	tRNA		tagctcagttggtagagcaggggattgaaaatcc		0.424658	31
		FR220475/transfer_RNA_(tRNA),_GTT_(Asn/N)_Asparagine	6~58	53	tRNA		gtagctcagttggtagagcaggggattgaaaatccccgtgtcggcggttcgat		0.621622	46
		FR195040/transfer_RNA_(tRNA),_GTT_(Asn/N)_Asparagine	7~39	33	tRNA		tagctcagttggtagagcaggggattgaaaatc		0.405405	30
		FR144626/transfer_RNA_(tRNA),_CGT_(Thr/T)_Threonine	7~47	41	tRNA		tagctcagttggtagagcaggggattgaaaatccccgtgtc		0.493151	36
		FR082613/transfer_RNA_(tRNA),_TGT_(Thr/T)_Threonine	7~39	33	tRNA		tagctcagttggtagagcaggggattgaaaatc		0.410959	30
		FR068774/transfer_RNA_(tRNA),_TTT_(Lys/K)_Lysine	9~65	57	tRNA		gctcagttggtagagcaggggattgaaaatccccgtgtcggcggttcgattccgtcc		0.657534	48
		FR005285/transfer_RNA_(tRNA),_TGT_(Thr/T)_Threonine	7~47	41	tRNA		tagctcagttggtagagcaggggattgaaaatccccgtgtc		0.493151	36
		FR321350/transfer_RNA_(tRNA),_GAA_(Phe/F)_Phenylalanine	6~61	56	tRNA		gtagctcagttggtagagcaggggattgaaaatccccgtgtcggcggttcgattcc		0.643836	47
>PAO_17696	exon splicing enhancer (ESE)	mvm ns2	13~18	6	NS2	Unknown	caccat
	exon splicing enhancer (ESE)	srp40-exonic splicing enhancer	7~12	6	SRp40	Unknown	actgcc
	exon splicing enhancer (ESE)	srp55-exonic splicing enhancer	32~38	7	SRp55	Unknown	tccggat
	exon splicing enhancer (ESE)	srp40 - exonic splicing enhancer	39~45	7	SRp40	Unknown	tacggac
>PAO_17729	exon splicing silencer (ESS)	fibronectin eda exon	10~15	6	fibronectin EDA	Homo sapiens, human	caagga
>PAO_17733	RNA editing sites	RNA C-to-U editing site	11 ~ 11	1	C-to-U		c	GACTTCACCCCAGTCATGAATCACTCCGTGGTAACCGTC
>PAO_17758	exon splicing enhancer (ESE)	srp40-exonic splicing enhancer	51~56	6	SRp40	Unknown	acagcg	CGCTTGCGCCGACCTTCAAACCATCTTCCGATCAGCGGGAGGCGCATTCTACAGCGT
	exon splicing enhancer (ESE)	srp40 - exonic splicing enhancer	50~56	7	SRp40	Unknown	tacagcg
	intron splicing silencer (ISS)	caspase-2, exon 9	24~30	7	Caspase-2	Mus musculus, mouse	tcttccg
>PAO_18150	exon splicing enhancer (ESE)	gh exon 5	15~20	6	GH	Bos taurus, bovine	ggaagt	TCGTATGGGGAGGGGGAAGTTCGGGGTTCAAGTCCGGACCGCTAGGGCGGGGTCCAGGAATCTGCCAACACTAAAC
	exon splicing enhancer (ESE)	srp55-exonic splicing enhancer	33~39	7	SRp55	Unknown	tccggac
	intron splicing enhancer (ISE)	gh-1 intron 3	8~17	10	GH-1	Homo sapiens, human	gggaggggga
	intron splicing enhancer (ISE)	gh-1 intron 3	7~16	10	GH-1	Homo sapiens, human	ggggaggggg
	intron splicing enhancer (ISE)	β-tropomyosin exon, 6b	7~12	6	β-tropomyosin	Gallus gallus, chicken	ggggag
	intron splicing enhancer (ISE)	β-tropomyosin exon, 6b	13~18	6	β-tropomyosin	Gallus gallus, chicken	ggggaa
	untranslated region (UTR) motifs	Polyadenylation Signal (PAS)	70~76	7	PAS	Eukaryota	actaaac

## Sheet: Motifs of constitutive sRNAs
Bacterial ID	Motif Type	Motif Name	Position	Length	Binding factors	Organism	Motif Sequence	Bacteria full sequence	Similarity (functional sequences)	Match length (functional sequences)
PAO_10307	exon splicing enhancer (ESE)	srp40-exonic splicing enhancer	12 ~ 17	6	SRp40		acggcc
	C-to-U RNA editing sites	RNA C-to-U editing site	26 ~ 26	1	RNA		c
PAO_10509	exon splicing enhancer (ESE)	mvm ns2	38 ~ 43	6	NS2		acaccg
	exon splicing enhancer (ESE)	srp40-exonic splicing enhancer	27 ~ 32	6	SRp40		acggcg
	exon splicing enhancer (ESE)	srp55-exonic splicing enhancer	22 ~ 28	7	SRp55		tccggac
PAO_11336	exon splicing enhancer (ESE)	asf/ sf2-exonic splicing enhancer	53 ~ 60	8	ASF/SF2		gagaggaa
	exon splicing enhancer (ESE)	srp40-exonic splicing enhancer	45 ~ 50	6	SRp40		acagcg
	exon splicing enhancer (ESE)	srp40-exonic splicing enhancer	24 ~ 29	6	SRp40		actggt
PAO_12312	exon splicing enhancer (ESE)	asf/sf2 - exonic splicing enhancer	24 ~ 31	8	ASF/SF2		cgccggag
	exon splicing silencer (ESS)	fibronectin eda exon	33 ~ 38	6	fibronectin EDA		caagg
	intron splicing enhancer (ISE)	gh-1 intron 3	13 ~ 22	10	GH-1		ggtcccgggg
PAO_12637	exon splicing enhancer (ESE)	mvm ns2	20 ~ 25	6	NS2		caccag
	exon splicing enhancer (ESE)	srp40 - exonic splicing enhancer	11 ~ 17	7	SRp40		cacgtcg
	exon splicing enhancer (ESE)	sc35 - exonic splicing enhancer	17 ~ 25	9	SC35		ggccaccag
	exon splicing enhancer (ESE)	asf/sf2 - exonic splicing enhancer	9 ~ 16	8	ASF/SF2		cgcacgtc
PAO_13481	exon splicing enhancer (ESE)	srp40 - exonic splicing enhancer	5 ~ 11	7	SRp40		tgcagca
	Transcriptional regulatory motif	lin-14	25 ~ 30	6	Lin-14		gaacac
PAO_14122	exon splicing enhancer (ESE)	srp40 - exonic splicing enhancer	15 ~ 21	7	SRp40		cgcggcc
	intron splicing enhancer (ISE)	&#946;-tropomyosin, exon 6b	37 ~ 42	6	Tropomyosin		tgggcg
	intron splicing enhancer (ISE)	ctnt, exon 5	1 ~ 7	7	cTNT		ggctggc
PAO_14175	exon splicing enhancer (ESE)	srp40 - exonic splicing enhancer	16 ~ 22	7	SRp40		cgcagcc
	exon splicing enhancer (ESE)	srp40 - exonic splicing enhancer	35 ~ 41	7	SRp40		cgcagca
	intron splicing enhancer (ISE)	agrin y, exon 28	51 ~ 56	6	AGRIN		ttaccc
	intron splicing enhancer (ISE)	ctnt, exon 5	29 ~ 35	7	cTNT		agctggc
PAO_14190	exon splicing enhancer (ESE)	srp40-exonic splicing enhancer	18 ~ 23	6	SRp40		actgct
	untranslated region (UTR) motifs	Terminal Oligopyrimidine Tract (TOP)	1 ~ 7	7	TOP		cttcccg
PAO_16915	exon splicing enhancer (ESE)	mvm ns2	20 ~ 25	6	NS2		caccag
	intron splicing enhancer (ISE)	ighg2 cgamma2 (immunoglobulin heavy chain subclass g2 - cgamma2 gene) - intron 1	42 ~ 47	6	IGHG2		gtgagg
PAO_1694	exon splicing enhancer (ESE)	srp40-exonic splicing enhancer	7 ~ 12	6	SRp40		actgct
PAO_17225	exon splicing silencer (ESS)	fn eda	14 ~ 19	6	Fn-EDA		catggt
PAO_1778	exon splicing enhancer (ESE)	bpv-1 late exon 2	31 ~ 37	7	BPV-1 late		gaaggac
PAO_18130	exon splicing enhancer (ESE)	srp55-exonic splicing enhancer	35 ~ 41	7	SRp55		tccggag
	intron splicing enhancer (ISE)	cftr, intron 9	31 ~ 37	7	CFTR		ttcttcc
	intron splicing silencer (ISS)	caspase-2, exon 9	32 ~ 38	7	Caspase-2		tcttccg
PAO_2289	N/A	N/A	N/A	N/A	N/A		N/A
PAO_2356	N/A	N/A	N/A	N/A	N/A		N/A
PAO_3623	exon splicing enhancer (ESE)	srp40-exonic splicing enhancer	24 ~ 29	6	SRp40		acaggc
	intron splicing enhancer (ISE)	gh-1 intron 3	27 ~ 36	10	GH-1		ggcgccgggc
	intron splicing enhancer (ISE)	thyroid hormone receptor , exon 9	18 ~ 23	6	Thyroid Hormone Receptor		gggtgt
PAO_3830	intron splicing enhancer (ISE)	thyroid hormone receptor , exon 9	32 ~ 37	6	Thyroid Hormone Receptor		gggtgg
PAO_4017	exon splicing enhancer (ESE)	mvm ns2	15 ~ 20	6	NS2		caccag
	exon splicing enhancer (ESE)	asf/ sf2-exonic splicing enhancer	32 ~ 39	8	ASF/SF2		gggaggat
	exon splicing enhancer (ESE)	srp40-exonic splicing enhancer	8 ~ 13	6	SRp40		acagca
	exon splicing enhancer (ESE)	srp40-exonic splicing enhancer	1 ~ 6	6	SRp40		acggcg
	exon splicing enhancer (ESE)	srp40 - exonic splicing enhancer	21 ~ 27	7	SRp40		cgcggag
	intron splicing enhancer (ISE)	thyroid hormone receptor , exon 9	30 ~ 37	8	Thyroid Hormone Receptor		gagggagg
	intron splicing enhancer (ISE)	&#946;-tropomyosin exon, 6b	27 ~ 32	6	Tropomyosin		ggggag
PAO_405	exon splicing enhancer (ESE)	mvm ns2	24 ~ 29	6	NS2		acaccc
PAO_4089	N/A	N/A	N/A	N/A	N/A		N/A
PAO_5585	exon splicing enhancer (ESE)	sc35 - exonic splicing enhancer	7 ~ 14	8	SC35		gacccgta
	exon splicing enhancer (ESE)	sc35 - exonic splicing enhancer	7 ~ 14	8	SC35		gacccgta
	exon splicing enhancer (ESE)	asf/sf2 - exonic splicing enhancer	53 ~ 60	8	ASF/SF2		cgcaggtt
	intron splicing enhancer (ISE)	&#946;-tropomyosin, exon 6b	41 ~ 46	6	Tropomyosin		tgggcg
PAO_6120	exon splicing enhancer (ESE)	sc35 - exonic splicing enhancer	4 ~ 11	8	SC35		gattcccc
	exon splicing enhancer (ESE)	sc35 - exonic splicing enhancer	4 ~ 11	8	SC35		gattcccc
PAO_6403	N/A	N/A	N/A	N/A	N/A		N/A
PAO_663	intron splicing enhancer (ISE)	&#946;-tropomyosin, exon 6b	16 ~ 21	6	Tropomyosin		tgggct
	C-to-U RNA editing sites	RNA C-to-U editing site	8 ~ 8	1	RNA		c
PAO_6819	exon splicing enhancer (ESE)	srp40-exonic splicing enhancer	27 ~ 32	6	SRp40		acggc
	Transcriptional regulatory motif	che-1	14 ~ 19	6	che-1		gaaacc
PAO_7116	exon splicing enhancer (ESE)	gh exon 5	34 ~ 39	6	GH		ggaagt
	exon splicing silencer (ESS)	fibronectin eda exon	68 ~ 73	6	fibronectin EDA		caagg
	intron splicing enhancer (ISE)	&#946;-tropomyosin exon, 6b	32 ~ 37	6	Tropomyosin		ggggaa
PAO_7305	exon splicing enhancer (ESE)	beta-globin exon 2	20 ~ 26	7	β-globin		ggacaag
PAO_7374	exon splicing enhancer (ESE)	srp40-exonic splicing enhancer	1 ~ 6	6	SRp40		actggt
	exon splicing enhancer (ESE)	sc35 - exonic splicing enhancer	4 ~ 11	8	SC35		ggtccgcg
	exon splicing enhancer (ESE)	sc35 - exonic splicing enhancer	4 ~ 11	8	SC35		ggtccgcg
PAO_7469	exon splicing enhancer (ESE)	asf/ sf2-exonic splicing enhancer	40 ~ 47	8	ASF/SF2		gagaggaa
	exon splicing enhancer (ESE)	srp40-exonic splicing enhancer	24 ~ 29	6	SRp40		acgggg
	exon splicing enhancer (ESE)	srp40 - exonic splicing enhancer	16 ~ 22	7	SRp40		cacagag
PAO_858	exon splicing enhancer (ESE)	gh1: growth hormone 1, exon3	1 ~ 8	8	GH1		aagaagcc
PAO_8690	exon splicing enhancer (ESE)	srp40-exonic splicing enhancer	35 ~ 40	6	SRp40		actgca
PAO_9364	exon splicing enhancer (ESE)	srp40-exonic splicing enhancer	36 ~ 41	6	SRp40		acggct
	exon splicing enhancer (ESE)	srp40 - exonic splicing enhancer	26 ~ 32	7	SRp40		tgcagcg
	exon splicing enhancer (ESE)	srp55 - exonic splicing enhancer	57 ~ 64	8	SRp55		tctctcgg
	exon splicing enhancer (ESE)	asf/sf2 - exonic splicing enhancer	20 ~ 27	8	ASF/SF2		cgcacgtg
	intron splicing silencer (ISS)	c-src, exon n1	58 ~ 63	6	c-Src		ctctcg

## Sheet: summary_table
	Motif type	Target
sRNAs of interaction	RNA editing sites	C-to-U
sRNAs of interaction	functional RNA sequences	tRNA
sRNAs of interaction	exon splicing enhancer (ESE)	SRp40
sRNAs of interaction	exon splicing enhancer (ESE)	SRp40
sRNAs of interaction	exon splicing enhancer (ESE)	SC35
sRNAs of interaction	intron splicing enhancer (ISE)	AGRIN
sRNAs of interaction	intron splicing enhancer (ISE)	Thyroid Hormone Receptor
sRNAs of interaction	intron splicing enhancer (ISE)	β-tropomyosin
sRNAs of interaction	RNA editing sites	C-to-U
sRNAs of interaction	exon splicing enhancer (ESE)	NS2
sRNAs of interaction	exon splicing enhancer (ESE)	GH
sRNAs of interaction	intron splicing enhancer (ISE)	GH-1
sRNAs of interaction	intron splicing enhancer (ISE)	cTNT
sRNAs of interaction	exon splicing enhancer (ESE)	ASF/SF2
sRNAs of interaction	intron splicing enhancer (ISE)	Thyroid Hormone Receptor
sRNAs of interaction	exon splicing enhancer (ESE)	NS2
sRNAs of interaction	exon splicing enhancer (ESE)	SRp55
sRNAs of interaction	exon splicing silencer (ESS)	fibronectin EDA
sRNAs of interaction	intron splicing enhancer (ISE)	IGHG2
sRNAs of interaction	intron splicing silencer (ISS)	c-Src
sRNAs of interaction	functional RNA sequences	tRNA
sRNAs of interaction	exon splicing enhancer (ESE)	GH
sRNAs of interaction	intron splicing enhancer (ISE)	cTNT
sRNAs of interaction	exon splicing enhancer (ESE)	BPV-1 late
sRNAs of interaction	exon splicing enhancer (ESE)	GH-1
sRNAs of interaction	exon splicing enhancer (ESE)	SRp40
sRNAs of interaction	exon splicing silencer (ESS)	fibronectin EDA
sRNAs of interaction	Transcriptional regulatory motif	Lin-14
sRNAs of interaction	RNA editing sites	C-to-U
sRNAs of interaction	exon splicing enhancer (ESE)	SRp40
sRNAs of interaction	exon splicing enhancer (ESE)	ASF/SF2
sRNAs of interaction	intron splicing enhancer (ISE)	GH-1
sRNAs of interaction	exon splicing enhancer (ESE)	NS2
sRNAs of interaction	exon splicing enhancer (ESE)	SC35
sRNAs of interaction	intron splicing enhancer (ISE)	AGRIN
sRNAs of interaction	intron splicing enhancer (ISE)	β-tropomyosin
sRNAs of interaction	intron splicing silencer (ISS)	Sxl
sRNAs of interaction	intron splicing silencer (ISS)	Transformer
sRNAs of interaction	untranslated region (UTR) motifs	TOP
sRNAs of interaction	RNA editing sites	C-to-U
sRNAs of interaction	functional RNA sequences	sRNA_P16
sRNAs of interaction	functional RNA sequences	tRNA
sRNAs of interaction	exon splicing enhancer (ESE)	ASF/SF2
sRNAs of interaction	exon splicing enhancer (ESE)	SRp40
sRNAs of interaction	exon splicing enhancer (ESE)	SRp40
sRNAs of interaction	intron splicing enhancer (ISE)	cTNT
sRNAs of interaction	functional RNA sequences	tRNA
sRNAs of interaction	exon splicing enhancer (ESE)	SC35
sRNAs of interaction	exon splicing enhancer (ESE)	SC35
sRNAs of interaction	exon splicing silencer (ESS)	fibronectin EDA
sRNAs of interaction	intron splicing enhancer (ISE)	CFTR
sRNAs of interaction	RNA editing sites	C-to-U
sRNAs of interaction	exon splicing enhancer (ESE)	SRp40
sRNAs of interaction	exon splicing enhancer (ESE)	SRp40
sRNAs of interaction	exon splicing enhancer (ESE)	SC35
sRNAs of interaction	exon splicing enhancer (ESE)	SC35
sRNAs of interaction	exon splicing enhancer (ESE)	SRp40
sRNAs of interaction	exon splicing enhancer (ESE)	SC35
sRNAs of interaction	exon splicing enhancer (ESE)	ASF/SF2
sRNAs of interaction	RNA editing sites	C-to-U
sRNAs of interaction	exon splicing enhancer (ESE)	ASF/SF2
sRNAs of interaction	intron splicing enhancer (ISE)	β-tropomyosin
sRNAs of interaction	intron splicing silencer (ISS)	c-Src
sRNAs of interaction	exon splicing enhancer (ESE)	NS2
sRNAs of interaction	exon splicing enhancer (ESE)	SRp55
sRNAs of interaction	intron splicing enhancer (ISE)	IGHG2
sRNAs of interaction	intron splicing silencer (ISS)	c-Src
sRNAs of interaction	functional RNA sequences	tRNA
sRNAs of interaction	exon splicing enhancer (ESE)	NS2
sRNAs of interaction	exon splicing enhancer (ESE)	SRp40
sRNAs of interaction	exon splicing enhancer (ESE)	SRp55
sRNAs of interaction	exon splicing enhancer (ESE)	SRp40
sRNAs of interaction	exon splicing silencer (ESS)	fibronectin EDA
sRNAs of interaction	RNA editing sites	C-to-U
sRNAs of interaction	exon splicing enhancer (ESE)	SC35
sRNAs of interaction	RNA editing sites	C-to-U
sRNAs of interaction	exon splicing enhancer (ESE)	SC35
sRNAs of interaction	exon splicing enhancer (ESE)	SRp40
sRNAs of interaction	exon splicing enhancer (ESE)	SRp40
sRNAs of interaction	exon splicing enhancer (ESE)	SRp40
sRNAs of interaction	exon splicing enhancer (ESE)	SRp55
sRNAs of interaction	untranslated region (UTR) motifs	MBE
sRNAs of interaction	exon splicing silencer (ESS)	fibronectin EDA
sRNAs of interaction	RNA editing sites	C-to-U
sRNAs of interaction	exon splicing enhancer (ESE)	SC35
sRNAs of interaction	RNA editing sites	C-to-U
sRNAs of interaction	exon splicing enhancer (ESE)	SRp40
sRNAs of interaction	exon splicing enhancer (ESE)	SRp40
sRNAs of interaction	untranslated region (UTR) motifs	PAS
sRNAs of interaction	exon splicing enhancer (ESE)	fibronectin EDA
sRNAs of interaction	exon splicing enhancer (ESE)	GH
sRNAs of interaction	exon splicing enhancer (ESE)	hiv-1 tat
sRNAs of interaction	exon splicing enhancer (ESE)	Beta-TM
sRNAs of interaction	exon splicing enhancer (ESE)	SR protein 9g8
sRNAs of interaction	exon splicing enhancer (ESE)	XI collagen
sRNAs of interaction	exon splicing enhancer (ESE)	BPV-1 late
sRNAs of interaction	exon splicing enhancer (ESE)	BPV-1 late
sRNAs of interaction	exon splicing enhancer (ESE)	GH-1
sRNAs of interaction	exon splicing enhancer (ESE)	GH-1
sRNAs of interaction	exon splicing enhancer (ESE)	ASF/SF2
sRNAs of interaction	exon splicing enhancer (ESE)	SRp40
sRNAs of interaction	exon splicing enhancer (ESE)	SC35
sRNAs of interaction	exon splicing enhancer (ESE)	SC35
sRNAs of interaction	exon splicing enhancer (ESE)	SRp40
sRNAs of interaction	untranslated region (UTR) motifs	PAS
sRNAs of interaction	RNA editing sites	C-to-U
sRNAs of interaction	RNA editing sites	C-to-U
sRNAs of interaction	exon splicing enhancer (ESE)	SRp40
sRNAs of interaction	exon splicing enhancer (ESE)	SRp40
sRNAs of interaction	exon splicing silencer (ESS)	fibronectin EDA
sRNAs of interaction	untranslated region (UTR) motifs	TOP
sRNAs of interaction	untranslated region (UTR) motifs	PAS
sRNAs of interaction	exon splicing enhancer (ESE)	SRp40
sRNAs of interaction	exon splicing enhancer (ESE)	SRp40
sRNAs of interaction	intron splicing enhancer (ISE)	β-tropomyosin
sRNAs of interaction	intron splicing enhancer (ISE)	cTNT
sRNAs of interaction	exon splicing enhancer (ESE)	SRp55
sRNAs of interaction	exon splicing enhancer (ESE)	SRp40
sRNAs of interaction	exon splicing enhancer (ESE)	NS2
sRNAs of interaction	exon splicing enhancer (ESE)	SRp55
sRNAs of interaction	exon splicing enhancer (ESE)	ASF/SF2
sRNAs of interaction	exon splicing silencer (ESS)	BPV-1 late
sRNAs of interaction	intron splicing enhancer (ISE)	GH-1
sRNAs of interaction	intron splicing enhancer (ISE)	β-tropomyosin
sRNAs of interaction	intron splicing enhancer (ISE)	β-tropomyosin
sRNAs of interaction	functional RNA sequences	tRNA
sRNAs of interaction	exon splicing enhancer (ESE)	NS2
sRNAs of interaction	exon splicing enhancer (ESE)	SRp40
sRNAs of interaction	exon splicing enhancer (ESE)	SRp55
sRNAs of interaction	exon splicing enhancer (ESE)	SRp40
sRNAs of interaction	exon splicing silencer (ESS)	fibronectin EDA
sRNAs of interaction	RNA editing sites	C-to-U
sRNAs of interaction	exon splicing enhancer (ESE)	SRp40
sRNAs of interaction	exon splicing enhancer (ESE)	SRp40
sRNAs of interaction	intron splicing silencer (ISS)	Caspase-2
sRNAs of interaction	exon splicing enhancer (ESE)	GH
sRNAs of interaction	exon splicing enhancer (ESE)	SRp55
sRNAs of interaction	intron splicing enhancer (ISE)	GH-1
sRNAs of interaction	intron splicing enhancer (ISE)	GH-1
sRNAs of interaction	intron splicing enhancer (ISE)	β-tropomyosin
sRNAs of interaction	intron splicing enhancer (ISE)	β-tropomyosin
sRNAs of interaction	untranslated region (UTR) motifs	PAS
sRNAs constitutive	exon splicing enhancer (ESE)	SRp40
sRNAs constitutive	RNA editing sites	C-to-U
sRNAs constitutive	exon splicing enhancer (ESE)	NS2
sRNAs constitutive	exon splicing enhancer (ESE)	SRp40
sRNAs constitutive	exon splicing enhancer (ESE)	SRp55
sRNAs constitutive	exon splicing enhancer (ESE)	ASF/SF2
sRNAs constitutive	exon splicing enhancer (ESE)	SRp40
sRNAs constitutive	exon splicing enhancer (ESE)	SRp40
sRNAs constitutive	exon splicing enhancer (ESE)	ASF/SF2
sRNAs constitutive	exon splicing silencer (ESS)	fibronectin EDA
sRNAs constitutive	intron splicing enhancer (ISE)	GH-1
sRNAs constitutive	exon splicing enhancer (ESE)	NS2
sRNAs constitutive	exon splicing enhancer (ESE)	SRp40
sRNAs constitutive	exon splicing enhancer (ESE)	SC35
sRNAs constitutive	exon splicing enhancer (ESE)	ASF/SF2
sRNAs constitutive	exon splicing enhancer (ESE)	SRp40
sRNAs constitutive	Transcriptional regulatory motif	Lin-14
sRNAs constitutive	exon splicing enhancer (ESE)	SRp40
sRNAs constitutive	intron splicing enhancer (ISE)	Tropomyosin
sRNAs constitutive	intron splicing enhancer (ISE)	cTNT
sRNAs constitutive	exon splicing enhancer (ESE)	SRp40
sRNAs constitutive	exon splicing enhancer (ESE)	SRp40
sRNAs constitutive	intron splicing enhancer (ISE)	AGRIN
sRNAs constitutive	intron splicing enhancer (ISE)	cTNT
sRNAs constitutive	exon splicing enhancer (ESE)	SRp40
sRNAs constitutive	untranslated region (UTR) motifs	TOP
sRNAs constitutive	exon splicing enhancer (ESE)	NS2
sRNAs constitutive	intron splicing enhancer (ISE)	IGHG2
sRNAs constitutive	exon splicing enhancer (ESE)	SRp40
sRNAs constitutive	exon splicing silencer (ESS)	fibronectin EDA
sRNAs constitutive	exon splicing enhancer (ESE)	BPV-1 late
sRNAs constitutive	exon splicing enhancer (ESE)	SRp55
sRNAs constitutive	intron splicing enhancer (ISE)	CFTR
sRNAs constitutive	intron splicing silencer (ISS)	Caspase-2
sRNAs constitutive	exon splicing enhancer (ESE)	SRp40
sRNAs constitutive	intron splicing enhancer (ISE)	GH-1
sRNAs constitutive	intron splicing enhancer (ISE)	Thyroid Hormone Receptor
sRNAs constitutive	intron splicing enhancer (ISE)	Thyroid Hormone Receptor
sRNAs constitutive	exon splicing enhancer (ESE)	NS2
sRNAs constitutive	exon splicing enhancer (ESE)	ASF/SF2
sRNAs constitutive	exon splicing enhancer (ESE)	SRp40
sRNAs constitutive	exon splicing enhancer (ESE)	SRp40
sRNAs constitutive	exon splicing enhancer (ESE)	SRp40
sRNAs constitutive	intron splicing enhancer (ISE)	Thyroid Hormone Receptor
sRNAs constitutive	intron splicing enhancer (ISE)	Tropomyosin
sRNAs constitutive	exon splicing enhancer (ESE)	NS2
sRNAs constitutive	exon splicing enhancer (ESE)	SC35
sRNAs constitutive	exon splicing enhancer (ESE)	SC35
sRNAs constitutive	exon splicing enhancer (ESE)	ASF/SF2
sRNAs constitutive	intron splicing enhancer (ISE)	Tropomyosin
sRNAs constitutive	exon splicing enhancer (ESE)	SC35
sRNAs constitutive	exon splicing enhancer (ESE)	SC35
sRNAs constitutive	intron splicing enhancer (ISE)	Tropomyosin
sRNAs constitutive	RNA editing sites	C-to-U
sRNAs constitutive	exon splicing enhancer (ESE)	SRp40
sRNAs constitutive	Transcriptional regulatory motif	che-1
sRNAs constitutive	exon splicing enhancer (ESE)	GH
sRNAs constitutive	exon splicing silencer (ESS)	fibronectin EDA
sRNAs constitutive	intron splicing enhancer (ISE)	Tropomyosin
sRNAs constitutive	exon splicing enhancer (ESE)	β-globin
sRNAs constitutive	exon splicing enhancer (ESE)	SRp40
sRNAs constitutive	exon splicing enhancer (ESE)	SC35
sRNAs constitutive	exon splicing enhancer (ESE)	SC35
sRNAs constitutive	exon splicing enhancer (ESE)	ASF/SF2
sRNAs constitutive	exon splicing enhancer (ESE)	SRp40
sRNAs constitutive	exon splicing enhancer (ESE)	SRp40
sRNAs constitutive	exon splicing enhancer (ESE)	GH1
sRNAs constitutive	exon splicing enhancer (ESE)	SRp40
sRNAs constitutive	exon splicing enhancer (ESE)	SRp40
sRNAs constitutive	exon splicing enhancer (ESE)	SRp40
sRNAs constitutive	exon splicing enhancer (ESE)	SRp55
sRNAs constitutive	exon splicing enhancer (ESE)	ASF/SF2
sRNAs constitutive	intron splicing silencer (ISS)	c-Src
			18.4932

## Sheet: statistics
	Motif type	Induced sRNAs	Constitutive sRNAs	p (Fisher exact test)	*using number of sRNAs as categories
sRNAs of interaction	exon splicing enhancer (ESE)	76	48	0.5517
sRNAs of interaction	exon splicing silencer (ESS)	8	3	0.573
sRNAs of interaction	intron splicing enhancer (ISE)	24	15	0.6716
sRNAs of interaction	intron splicing silencer (ISS)	6	2	0.4576
all splicing motifs		114	68
sRNAs of interaction	functional RNA sequences	7	0	0.038
sRNAs of interaction	RNA editing sites	13	2	0.04
sRNAs of interaction	Transcriptional regulatory motif	1	2	0.5846
sRNAs of interaction	untranslated region (UTR) motifs	7	1	0.1327
sRNAs of interaction	none	4	4
all sRNA motifs		260	77	0.1275

## Sheet: ESE
sRNAs of interaction	exon splicing enhancer (ESE)	SRp40			SRp40	49
sRNAs of interaction	exon splicing enhancer (ESE)	SRp40			SC35	19
sRNAs of interaction	exon splicing enhancer (ESE)	SC35			NS2	12
sRNAs of interaction	exon splicing enhancer (ESE)	NS2			GH	5
sRNAs of interaction	exon splicing enhancer (ESE)	GH			ASF/SF2	14
sRNAs of interaction	exon splicing enhancer (ESE)	ASF/SF2			SRp55	11
sRNAs of interaction	exon splicing enhancer (ESE)	NS2			BPV-1 late	4
sRNAs of interaction	exon splicing enhancer (ESE)	SRp55			GH-1	4
sRNAs of interaction	exon splicing enhancer (ESE)	GH			fibronectin EDA	1
sRNAs of interaction	exon splicing enhancer (ESE)	BPV-1 late			hiv-1 tat	1
sRNAs of interaction	exon splicing enhancer (ESE)	GH-1			Beta-TM	1
sRNAs of interaction	exon splicing enhancer (ESE)	SRp40			SR protein 9g8	1
sRNAs of interaction	exon splicing enhancer (ESE)	SRp40			XI collagen	1
sRNAs of interaction	exon splicing enhancer (ESE)	ASF/SF2			β-globin	1
sRNAs of interaction	exon splicing enhancer (ESE)	NS2
sRNAs of interaction	exon splicing enhancer (ESE)	SC35
sRNAs of interaction	exon splicing enhancer (ESE)	ASF/SF2
sRNAs of interaction	exon splicing enhancer (ESE)	SRp40
sRNAs of interaction	exon splicing enhancer (ESE)	SRp40
sRNAs of interaction	exon splicing enhancer (ESE)	SC35
sRNAs of interaction	exon splicing enhancer (ESE)	SC35
sRNAs of interaction	exon splicing enhancer (ESE)	SRp40
sRNAs of interaction	exon splicing enhancer (ESE)	SRp40
sRNAs of interaction	exon splicing enhancer (ESE)	SC35
sRNAs of interaction	exon splicing enhancer (ESE)	SC35
sRNAs of interaction	exon splicing enhancer (ESE)	SRp40
sRNAs of interaction	exon splicing enhancer (ESE)	SC35
sRNAs of interaction	exon splicing enhancer (ESE)	ASF/SF2
sRNAs of interaction	exon splicing enhancer (ESE)	ASF/SF2
sRNAs of interaction	exon splicing enhancer (ESE)	NS2
sRNAs of interaction	exon splicing enhancer (ESE)	SRp55
sRNAs of interaction	exon splicing enhancer (ESE)	NS2
sRNAs of interaction	exon splicing enhancer (ESE)	SRp40
sRNAs of interaction	exon splicing enhancer (ESE)	SRp55
sRNAs of interaction	exon splicing enhancer (ESE)	SRp40
sRNAs of interaction	exon splicing enhancer (ESE)	SC35
sRNAs of interaction	exon splicing enhancer (ESE)	SC35
sRNAs of interaction	exon splicing enhancer (ESE)	SRp40
sRNAs of interaction	exon splicing enhancer (ESE)	SRp40
sRNAs of interaction	exon splicing enhancer (ESE)	SRp40
sRNAs of interaction	exon splicing enhancer (ESE)	SRp55
sRNAs of interaction	exon splicing enhancer (ESE)	SC35
sRNAs of interaction	exon splicing enhancer (ESE)	SRp40
sRNAs of interaction	exon splicing enhancer (ESE)	SRp40
sRNAs of interaction	exon splicing enhancer (ESE)	fibronectin EDA
sRNAs of interaction	exon splicing enhancer (ESE)	GH
sRNAs of interaction	exon splicing enhancer (ESE)	hiv-1 tat
sRNAs of interaction	exon splicing enhancer (ESE)	Beta-TM
sRNAs of interaction	exon splicing enhancer (ESE)	SR protein 9g8
sRNAs of interaction	exon splicing enhancer (ESE)	XI collagen
sRNAs of interaction	exon splicing enhancer (ESE)	BPV-1 late
sRNAs of interaction	exon splicing enhancer (ESE)	BPV-1 late
sRNAs of interaction	exon splicing enhancer (ESE)	GH-1
sRNAs of interaction	exon splicing enhancer (ESE)	GH-1
sRNAs of interaction	exon splicing enhancer (ESE)	ASF/SF2
sRNAs of interaction	exon splicing enhancer (ESE)	SRp40
sRNAs of interaction	exon splicing enhancer (ESE)	SC35
sRNAs of interaction	exon splicing enhancer (ESE)	SC35
sRNAs of interaction	exon splicing enhancer (ESE)	SRp40
sRNAs of interaction	exon splicing enhancer (ESE)	SRp40
sRNAs of interaction	exon splicing enhancer (ESE)	SRp40
sRNAs of interaction	exon splicing enhancer (ESE)	SRp40
sRNAs of interaction	exon splicing enhancer (ESE)	SRp40
sRNAs of interaction	exon splicing enhancer (ESE)	SRp55
sRNAs of interaction	exon splicing enhancer (ESE)	SRp40
sRNAs of interaction	exon splicing enhancer (ESE)	NS2
sRNAs of interaction	exon splicing enhancer (ESE)	SRp55
sRNAs of interaction	exon splicing enhancer (ESE)	ASF/SF2
sRNAs of interaction	exon splicing enhancer (ESE)	NS2
sRNAs of interaction	exon splicing enhancer (ESE)	SRp40
sRNAs of interaction	exon splicing enhancer (ESE)	SRp55
sRNAs of interaction	exon splicing enhancer (ESE)	SRp40
sRNAs of interaction	exon splicing enhancer (ESE)	SRp40
sRNAs of interaction	exon splicing enhancer (ESE)	SRp40
sRNAs of interaction	exon splicing enhancer (ESE)	GH
sRNAs of interaction	exon splicing enhancer (ESE)	SRp55
sRNAs constitutive	exon splicing enhancer (ESE)	SRp40
sRNAs constitutive	exon splicing enhancer (ESE)	NS2
sRNAs constitutive	exon splicing enhancer (ESE)	SRp40
sRNAs constitutive	exon splicing enhancer (ESE)	SRp55
sRNAs constitutive	exon splicing enhancer (ESE)	ASF/SF2
sRNAs constitutive	exon splicing enhancer (ESE)	SRp40
sRNAs constitutive	exon splicing enhancer (ESE)	SRp40
sRNAs constitutive	exon splicing enhancer (ESE)	ASF/SF2
sRNAs constitutive	exon splicing enhancer (ESE)	NS2
sRNAs constitutive	exon splicing enhancer (ESE)	SRp40
sRNAs constitutive	exon splicing enhancer (ESE)	SC35
sRNAs constitutive	exon splicing enhancer (ESE)	ASF/SF2
sRNAs constitutive	exon splicing enhancer (ESE)	SRp40
sRNAs constitutive	exon splicing enhancer (ESE)	SRp40
sRNAs constitutive	exon splicing enhancer (ESE)	SRp40
sRNAs constitutive	exon splicing enhancer (ESE)	SRp40
sRNAs constitutive	exon splicing enhancer (ESE)	SRp40
sRNAs constitutive	exon splicing enhancer (ESE)	NS2
sRNAs constitutive	exon splicing enhancer (ESE)	SRp40
sRNAs constitutive	exon splicing enhancer (ESE)	BPV-1 late
sRNAs constitutive	exon splicing enhancer (ESE)	SRp55
sRNAs constitutive	exon splicing enhancer (ESE)	SRp40
sRNAs constitutive	exon splicing enhancer (ESE)	NS2
sRNAs constitutive	exon splicing enhancer (ESE)	ASF/SF2
sRNAs constitutive	exon splicing enhancer (ESE)	SRp40
sRNAs constitutive	exon splicing enhancer (ESE)	SRp40
sRNAs constitutive	exon splicing enhancer (ESE)	SRp40
sRNAs constitutive	exon splicing enhancer (ESE)	NS2
sRNAs constitutive	exon splicing enhancer (ESE)	SC35
sRNAs constitutive	exon splicing enhancer (ESE)	SC35
sRNAs constitutive	exon splicing enhancer (ESE)	ASF/SF2
sRNAs constitutive	exon splicing enhancer (ESE)	SC35
sRNAs constitutive	exon splicing enhancer (ESE)	SC35
sRNAs constitutive	exon splicing enhancer (ESE)	SRp40
sRNAs constitutive	exon splicing enhancer (ESE)	GH
sRNAs constitutive	exon splicing enhancer (ESE)	β-globin
sRNAs constitutive	exon splicing enhancer (ESE)	SRp40
sRNAs constitutive	exon splicing enhancer (ESE)	SC35
sRNAs constitutive	exon splicing enhancer (ESE)	SC35
sRNAs constitutive	exon splicing enhancer (ESE)	ASF/SF2
sRNAs constitutive	exon splicing enhancer (ESE)	SRp40
sRNAs constitutive	exon splicing enhancer (ESE)	SRp40
sRNAs constitutive	exon splicing enhancer (ESE)	GH-1
sRNAs constitutive	exon splicing enhancer (ESE)	SRp40
sRNAs constitutive	exon splicing enhancer (ESE)	SRp40
sRNAs constitutive	exon splicing enhancer (ESE)	SRp40
sRNAs constitutive	exon splicing enhancer (ESE)	SRp55
sRNAs constitutive	exon splicing enhancer (ESE)	ASF/SF2

## Sheet: ESS
sRNAs of interaction	exon splicing silencer (ESS)	fibronectin EDA
sRNAs of interaction	exon splicing silencer (ESS)	fibronectin EDA		fibronectin EDA	9
sRNAs of interaction	exon splicing silencer (ESS)	fibronectin EDA		BPV-1 late	1
sRNAs of interaction	exon splicing silencer (ESS)	fibronectin EDA
sRNAs of interaction	exon splicing silencer (ESS)	fibronectin EDA
sRNAs of interaction	exon splicing silencer (ESS)	fibronectin EDA
sRNAs of interaction	exon splicing silencer (ESS)	BPV-1 late
sRNAs of interaction	exon splicing silencer (ESS)	fibronectin EDA
sRNAs constitutive	exon splicing silencer (ESS)	fibronectin EDA
sRNAs constitutive	exon splicing silencer (ESS)	fibronectin EDA
sRNAs constitutive	exon splicing silencer (ESS)	fibronectin EDA

## Sheet: ISE
sRNAs of interaction	intron splicing enhancer (ISE)	AGRIN				AGRIN	3
sRNAs of interaction	intron splicing enhancer (ISE)	Thyroid Hormone Receptor				Thyroid Hormone Receptor	5
sRNAs of interaction	intron splicing enhancer (ISE)	β-tropomyosin				β-tropomyosin	13
sRNAs of interaction	intron splicing enhancer (ISE)	GH-1				GH-1	7
sRNAs of interaction	intron splicing enhancer (ISE)	cTNT				cTNT	6
sRNAs of interaction	intron splicing enhancer (ISE)	Thyroid Hormone Receptor				IGHG2	3
sRNAs of interaction	intron splicing enhancer (ISE)	IGHG2				CFTR	2
sRNAs of interaction	intron splicing enhancer (ISE)	cTNT				cTNT	6
sRNAs of interaction	intron splicing enhancer (ISE)	GH-1				IGHG2	3
sRNAs of interaction	intron splicing enhancer (ISE)	AGRIN				CFTR	2
sRNAs of interaction	intron splicing enhancer (ISE)	β-tropomyosin
sRNAs of interaction	intron splicing enhancer (ISE)	cTNT
sRNAs of interaction	intron splicing enhancer (ISE)	CFTR
sRNAs of interaction	intron splicing enhancer (ISE)	β-tropomyosin
sRNAs of interaction	intron splicing enhancer (ISE)	IGHG2
sRNAs of interaction	intron splicing enhancer (ISE)	β-tropomyosin
sRNAs of interaction	intron splicing enhancer (ISE)	cTNT
sRNAs of interaction	intron splicing enhancer (ISE)	GH-1
sRNAs of interaction	intron splicing enhancer (ISE)	β-tropomyosin
sRNAs of interaction	intron splicing enhancer (ISE)	β-tropomyosin
sRNAs of interaction	intron splicing enhancer (ISE)	GH-1
sRNAs of interaction	intron splicing enhancer (ISE)	GH-1
sRNAs of interaction	intron splicing enhancer (ISE)	β-tropomyosin
sRNAs of interaction	intron splicing enhancer (ISE)	β-tropomyosin
sRNAs constitutive	intron splicing enhancer (ISE)	GH-1
sRNAs constitutive	intron splicing enhancer (ISE)	β-tropomyosin
sRNAs constitutive	intron splicing enhancer (ISE)	cTNT
sRNAs constitutive	intron splicing enhancer (ISE)	AGRIN
sRNAs constitutive	intron splicing enhancer (ISE)	cTNT
sRNAs constitutive	intron splicing enhancer (ISE)	IGHG2
sRNAs constitutive	intron splicing enhancer (ISE)	CFTR
sRNAs constitutive	intron splicing enhancer (ISE)	GH-1
sRNAs constitutive	intron splicing enhancer (ISE)	Thyroid Hormone Receptor
sRNAs constitutive	intron splicing enhancer (ISE)	Thyroid Hormone Receptor
sRNAs constitutive	intron splicing enhancer (ISE)	Thyroid Hormone Receptor
sRNAs constitutive	intron splicing enhancer (ISE)	β-tropomyosin
sRNAs constitutive	intron splicing enhancer (ISE)	β-tropomyosin
sRNAs constitutive	intron splicing enhancer (ISE)	β-tropomyosin
sRNAs constitutive	intron splicing enhancer (ISE)	β-tropomyosin

## Sheet: ISS
sRNAs of interaction	intron splicing silencer (ISS)	C-Src			C-Src	4
sRNAs of interaction	intron splicing silencer (ISS)	Sxl			Sxl	1
sRNAs of interaction	intron splicing silencer (ISS)	Transformer			Transformer	1
sRNAs of interaction	intron splicing silencer (ISS)	C-Src			Caspase-2	2
sRNAs of interaction	intron splicing silencer (ISS)	C-Src
sRNAs of interaction	intron splicing silencer (ISS)	Caspase-2
sRNAs constitutive	intron splicing silencer (ISS)	Caspase-2
sRNAs constitutive	intron splicing silencer (ISS)	c-Src

## Sheet: fxlRNA
sRNAs of interaction	functional RNA sequences	tRNA
sRNAs of interaction	functional RNA sequences	tRNA		tRNA	6
sRNAs of interaction	functional RNA sequences	sRNA_P16		sRNA_P16	1
sRNAs of interaction	functional RNA sequences	tRNA
sRNAs of interaction	functional RNA sequences	tRNA
sRNAs of interaction	functional RNA sequences	tRNA
sRNAs of interaction	functional RNA sequences	tRNA
