# Supplementary material for: Interspecies RNA Interactome of Pathogen and Host in a Heritable Defensive Strategy
Source: Front Microbiol. 2021 Jul 21;12:649858. doi: 10.3389/fmicb.2021.649858 (PMC8334366; doi:10.3389/fmicb.2021.649858)
Supplement: Supplementary File 3 — Data for construction of the RNA interactome network. [file Data_Sheet_3.xlsx]

## Sheet: Node_attributes_gephi
File S3. RNA interactome network of cross-kingdom predictions
Id	Label	Constitutive/Induced	Organism	Biotype	MicroRNA_size	Own_Id/ Old Id
rsmY nested	rsmY	induced	P. aeruginosa	ncRNA	no	PAO_1343
amiL nested	amiL	induced	P. aeruginosa	ncRNA	yes	PAO_10341
crcZ nested	crcZ	induced	P. aeruginosa	ncRNA	no	PAO_15143, PAO_15144, PAO_15146
crcZ antinested	crcZ	induced	P. aeruginosa	ncRNA	no	PAO_15147
rgsA overlaped	rgsA	induced	P. aeruginosa	ncRNA	no	PAO_8684
tRNA-Ser antinested	tRNA	induced	P. aeruginosa	tRNA	no	PAO_2678
tRNA-Ala antioverlap	tRNA	induced	P. aeruginosa	tRNA	yes	PAO_1980
tRNA-Tyr	tRNA	induced	P. aeruginosa	tRNA	no	PAO_13059
tRNA-Phe	tRNA	induced	P. aeruginosa	tRNA	no	PAO_16745	PA4277.3
tRNA-Pro	tRNA	induced	P. aeruginosa	tRNA	no	PAO_8985
tRNA-Gly	tRNA	induced	P. aeruginosa	tRNA	no	PAO_2097
tRNA-Met	tRNA	induced	P. aeruginosa	tRNA	no	PAO_15266
tRNA-Asp	tRNA	induced	P. aeruginosa	tRNA	no	PAO_9937
tRNA-Ala nested	tRNA	induced	P. aeruginosa	tRNA	yes	PAO_13118, PAO_14955, PAO_17729
tRNA-Leu nested	tRNA	induced	P. aeruginosa	tRNA	no	PAO_5313, PAO_11728
tRNA-Gln nested	tRNA	induced	P. aeruginosa	tRNA	yes	PAO_14838
tRNA-Arg nested	tRNA	induced	P. aeruginosa	tRNA	no	PAO_5310
tRNA-Lys nested	tRNA	induced	P. aeruginosa	tRNA	no	PAO_14303
tRNA-Glu nested	tRNA	induced	P. aeruginosa	tRNA	no	PAO_8334
Pseudomon-1	Pseudomon-1	induced	P. aeruginosa	sRNA	no	PAO_18150
23S rRNA nested	rRNA	induced	P. aeruginosa	rRNA	no	PAO_14912
23S rRNA nested	rRNA	induced	P. aeruginosa	rRNA	no	PAO_17696
16S rRNA nested	rRNA	induced	P. aeruginosa	rRNA	no	PAO_13124
16S rRNA nested	rRNA	induced	P. aeruginosa	rRNA	no	PAO_14961
16S rRNA nested	rRNA	induced	P. aeruginosa	rRNA	no	PAO_13122
16S rRNA nested	rRNA	induced	P. aeruginosa	rRNA	no	PAO_14959
16S rRNA nested	rRNA	induced	P. aeruginosa	rRNA	no	PAO_17733
16S rRNA nested	rRNA	induced	P. aeruginosa	rRNA	no	PAO_1976
23S rRNA nested	rRNA	induced	P. aeruginosa	rRNA	no	PAO_13084
23S rRNA nested	rRNA	induced	P. aeruginosa	rRNA	no	PAO_14921
PA2137 nested	hypothetical protein	induced	P. aeruginosa	mRNA	no	PAO_6246
ldcA nested	ldcA	induced	P. aeruginosa	mRNA	no	PAO_5440
himD overlapped	himD	induced	P. aeruginosa	mRNA	no	PAO_9524
novel PAO_10576	novel	induced	P. aeruginosa	intergenic	no	PAO_10576
novel PAO_7207	novel	induced	P. aeruginosa	intergenic	no	PAO_7207
novel PAO_8219	novel	induced	P. aeruginosa	intergenic	no	PAO_8219
novel PAO_16316	novel	induced	P. aeruginosa	intergenic	no	PAO_16316
novel PAO_17758	novel	induced	P. aeruginosa	intergenic	no	PAO_17758
novel PAO_14309	novel	induced	P. aeruginosa	intergenic	no	PAO_14309
26s rRNA	rRNA	target	C. elegans	rRNA	no	rrn-3.1
21ur-6043	piRNa	target	C. elegans	piRNA	no	21ur-6043
mir-235	mir-235	target	C. elegans	pre_miRNA	no	mir-235
K07C10.5	ncRNA	target	C. elegans	ncRNA	no	K07C10.5
tRNA-Lys	tRNA	target	C. elegans	tRNA	no	M163.t1
C06E4.17	ncRNA	target	C. elegans	ncRNA	no	C06E4.17
C02F4.11	ncRNA	target	C. elegans	ncRNA	no	C02F4.11
21ur-3672	piRNA	target	C. elegans	piRNA	no	21ur-3672
Y43F8A.8	ncRNA	target	C. elegans	ncRNA	no	Y43F8A.8
C43H6.11	ncRNA	target	C. elegans	ncRNA	no	C43H6.11
W05B2.13	ncRNA	target	C. elegans	ncRNA	no	W05B2.13
tRNA-Phe	tRNA	target	C. elegans	tRNA	no	K05G3.t1
W03G11.8	W03G11.8	target	C. elegans	ncRNA	no	W03G11.8
F12E12.11	F12E12.11	target	C. elegans	mRNA	no	F12E12.11
C01B10.11	C01B10.11	target	C. elegans	mRNA	no	C01B10.11
K02E11.10	K02E11.10	target	C. elegans	mRNA	no	K02E11.10
F43C1.7	F43C1.7	target	C. elegans	mRNA	no	F43C1.7
rpl-41.2	rpl-41.2	target	C. elegans	mRNA	no	rpl-41.2
ZK697.14	ZK697.14	target	C. elegans	mRNA	no	ZK697.14
tomm-7	tomm-7	target	C. elegans	mRNA	no	tomm-7
mtx-2	mtx-2	target	C. elegans	mRNA	no	mtx-2
Y82E9BR.18	Y82E9BR.18	target	C. elegans	mRNA	no	Y82E9BR.18
clec-210	clec-210	target	C. elegans	mRNA	no	clec-210
Y73C8B.1	Y73C8B.1	target	C. elegans	mRNA	no	Y73C8B.1
Y58A7A.5	Y58A7A.5	target	C. elegans	mRNA	no	Y58A7A.5
Y54F10AM.5	Y54F10AM.5	target	C. elegans	mRNA	no	Y54F10AM.5
Y54E10A.17	Y54E10A.17	target	C. elegans	mRNA	no	Y54E10A.17
Y53G8B.2	Y53G8B.2	target	C. elegans	mRNA	no	Y53G8B.2
Y50D4B.2	Y50D4B.2	target	C. elegans	mRNA	no	Y50D4B.2
ugt-29	ugt-29	target	C. elegans	mRNA	no	ugt-29
nsun-2	nsun-2	target	C. elegans	mRNA	no	nsun-2
nhr-237	nhr-237	target	C. elegans	mRNA	no	nhr-237
Y22D7AL.10	Y22D7AL.10	target	C. elegans	mRNA	no	Y22D7AL.10
tomm-22	tomm-22	target	C. elegans	mRNA	no	tomm-22
W03G1.5	W03G1.5	target	C. elegans	mRNA	no	W03G1.5
W02F12.2	W02F12.2	target	C. elegans	mRNA	no	W02F12.2
pfd-5	pfd-5	target	C. elegans	mRNA	no	pfd-5
cyp-33C8	cyp-33C8	target	C. elegans	mRNA	no	cyp-33C8
hrg-1	hrg-1	target	C. elegans	mRNA	no	hrg-1
M60.7	M60.7	target	C. elegans	mRNA	no	M60.7
M04F3.4	M04F3.4	target	C. elegans	mRNA	no	M04F3.4
cest-34	cest-34	target	C. elegans	mRNA	no	cest-34
K09F6.10	K09F6.10	target	C. elegans	mRNA	no	K09F6.10
K08D9.4	K08D9.4	target	C. elegans	mRNA	no	K08D9.4
acdh-3	acdh-3	target	C. elegans	mRNA	no	acdh-3
ahcy-1	ahcy-1	target	C. elegans	mRNA	no	ahcy-1
ubxn-6	ubxn-6	target	C. elegans	mRNA	no	ubxn-6
F59B1.8	F59B1.8	target	C. elegans	mRNA	no	F59B1.8
acox-3	acox-3	target	C. elegans	mRNA	no	acox-3
ipgm-1	ipgm-1	target	C. elegans	mRNA	no	ipgm-1
cest-27	cest-27	target	C. elegans	mRNA	no	cest-27
pmt-2	pmt-2	target	C. elegans	mRNA	no	pmt-2
cutl-20	cutl-20	target	C. elegans	mRNA	no	cutl-20
F53C3.6	F53C3.6	target	C. elegans	mRNA	no	F53C3.6
F52E4.5	F52E4.5	target	C. elegans	mRNA	no	F52E4.5
nhr-142	nhr-142	target	C. elegans	mRNA	no	nhr-142
cyp-33C4	cyp-33C4	target	C. elegans	mRNA	no	cyp-33C4
F41G3.10	F41G3.10	target	C. elegans	mRNA	no	F41G3.10
ctsa-1.1	ctsa-1.1	target	C. elegans	mRNA	no	ctsa-1.1
cyp-33C3	cyp-33C3	target	C. elegans	mRNA	no	cyp-33C3
F28C10.3	F28C10.3	target	C. elegans	mRNA	no	F28C10.3
asp-13	asp-13	target	C. elegans	mRNA	no	asp-13
acdh-9	acdh-9	target	C. elegans	mRNA	no	acdh-9
ilys-5	ilys-5	target	C. elegans	mRNA	no	ilys-5
slc-17.5	slc-17.5	target	C. elegans	mRNA	no	slc-17.5
F18E3.11	F18E3.11	target	C. elegans	mRNA	no	F18E3.11
nhr-178	nhr-178	target	C. elegans	mRNA	no	nhr-178
F15E6.6	F15E6.6	target	C. elegans	mRNA	no	F15E6.6
F14F9.4	F14F9.4	target	C. elegans	mRNA	no	F14F9.4
F13C5.1	F13C5.1	target	C. elegans	mRNA	no	F13C5.1
farl-11	farl-11	target	C. elegans	mRNA	no	farl-11
nspb-12	nspb-12	target	C. elegans	mRNA	no	nspb-12
F09E5.3	F09E5.3	target	C. elegans	mRNA	no	F09E5.3
F07F6.8	F07F6.8	target	C. elegans	mRNA	no	F07F6.8
DC2.5	DC2.5	target	C. elegans	mRNA	no	DC2.5
nap-1	nap-1	target	C. elegans	mRNA	no	nap-1
D2063.1	D2063.1	target	C. elegans	mRNA	no	D2063.1
zhit-1	zhit-1	target	C. elegans	mRNA	no	zhit-1
mboa-3	mboa-3	target	C. elegans	mRNA	no	mboa-3
C49G7.3	C49G7.3	target	C. elegans	mRNA	no	C49G7.3
ugt-24	ugt-24	target	C. elegans	mRNA	no	ugt-24
acer-1	acer-1	target	C. elegans	mRNA	no	acer-1
abhd-5.2	abhd-5.2	target	C. elegans	mRNA	no	abhd-5.2
C35B1.2	C35B1.2	target	C. elegans	mRNA	no	C35B1.2
C29F5.1	C29F5.1	target	C. elegans	mRNA	no	C29F5.1
C23H5.8	C23H5.8	target	C. elegans	mRNA	no	C23H5.8
C17C3.1	C17C3.1	target	C. elegans	mRNA	no	C17C3.1
C15B12.8	C15B12.8	target	C. elegans	mRNA	no	C15B12.8
cyp-33A1	cyp-33A1	target	C. elegans	mRNA	no	cyp-33A1
ugt-28	ugt-28	target	C. elegans	mRNA	no	ugt-28
irg-1	irg-1	target	C. elegans	mRNA	no	irg-1
bath-44	bath-44	target	C. elegans	mRNA	no	bath-44
sams-3	sams-3	target	C. elegans	mRNA	no	sams-3
mthf-1	mthf-1	target	C. elegans	mRNA	no	mthf-1
best-3	best-3	target	C. elegans	mRNA	no	best-3
algn-11	algn-11	target	C. elegans	mRNA	no	algn-11
nfs-1	nfs-1	target	C. elegans	mRNA	no	nfs-1
K08E5.1	K08E5.1	target	C. elegans	mRNA	no	K08E5.1
cyp-13A10	cyp-13A10	target	C. elegans	mRNA	no	cyp-13A10
ZK896.5	ZK896.5	target	C. elegans	mRNA	no	ZK896.5
ZK822.5	ZK822.5	target	C. elegans	mRNA	no	ZK822.5
riok-3	riok-3	target	C. elegans	mRNA	no	riok-3
lips-6	lips-6	target	C. elegans	mRNA	no	lips-6
atfs-1	atfs-1	target	C. elegans	mRNA	no	atfs-1
Y73F4A.2	Y73F4A.2	target	C. elegans	mRNA	no	Y73F4A.2
abhd-3.1	abhd-3.1	target	C. elegans	mRNA	no	abhd-3.1
mrps-7	mrps-7	target	C. elegans	mRNA	no	mrps-7
daf-22	daf-22	target	C. elegans	mRNA	no	daf-22
ttr-24	ttr-24	target	C. elegans	mRNA	no	ttr-24
Y46G5A.18	Y46G5A.18	target	C. elegans	mRNA	no	Y46G5A.18
hphd-1	hphd-1	target	C. elegans	mRNA	no	hphd-1
mecr-1	mecr-1	target	C. elegans	mRNA	no	mecr-1
R107.5	R107.5	target	C. elegans	mRNA	no	R107.5
R53.4	R53.4	target	C. elegans	mRNA	no	R53.4
pck-2	pck-2	target	C. elegans	mRNA	no	pck-2
prdx-3	prdx-3	target	C. elegans	mRNA	no	prdx-3
R07E3.1	R07E3.1	target	C. elegans	mRNA	no	R07E3.1
R04B5.6	R04B5.6	target	C. elegans	mRNA	no	R04B5.6
metr-1	metr-1	target	C. elegans	mRNA	no	metr-1
ugt-62	ugt-62	target	C. elegans	mRNA	no	ugt-62
taap-1	taap-1	target	C. elegans	mRNA	no	taap-1
sodh-1	sodh-1	target	C. elegans	mRNA	no	sodh-1
nipi-3	nipi-3	target	C. elegans	mRNA	no	nipi-3
nol-56	nol-56	target	C. elegans	mRNA	no	nol-56
endu-1	endu-1	target	C. elegans	mRNA	no	endu-1
K01D12.10	K01D12.10	target	C. elegans	mRNA	no	K01D12.10
cri-3	cri-3	target	C. elegans	mRNA	no	cri-3
F54D5.12	F54D5.12	target	C. elegans	mRNA	no	F54D5.12
F53F4.10	F53F4.10	target	C. elegans	mRNA	no	F53F4.10
acaa-2	acaa-2	target	C. elegans	mRNA	no	acaa-2
drd-1	drd-1	target	C. elegans	mRNA	no	drd-1
argk-1	argk-1	target	C. elegans	mRNA	no	argk-1
F44A6.5	F44A6.5	target	C. elegans	mRNA	no	F44A6.5
F32D8.12	F32D8.12	target	C. elegans	mRNA	no	F32D8.12
acs-2	acs-2	target	C. elegans	mRNA	no	acs-2
F27D4.1	F27D4.1	target	C. elegans	mRNA	no	F27D4.1
F22B5.4	F22B5.4	target	C. elegans	mRNA	no	F22B5.4
cyp-13A12	cyp-13A12	target	C. elegans	mRNA	no	cyp-13A12
vwa-8	vwa-8	target	C. elegans	mRNA	no	vwa-8
ttr-21	ttr-21	target	C. elegans	mRNA	no	ttr-21
F09B12.3	F09B12.3	target	C. elegans	mRNA	no	F09B12.3
clec-57	clec-57	target	C. elegans	mRNA	no	clec-57
acox-1.3	acox-1.3	target	C. elegans	mRNA	no	acox-1.3
mrpl-44	mrpl-44	target	C. elegans	mRNA	no	mrpl-44
oac-13	oac-13	target	C. elegans	mRNA	no	oac-13
DH11.2	DH11.2	target	C. elegans	mRNA	no	DH11.2
nspc-20	nspc-20	target	C. elegans	mRNA	no	nspc-20
sdz-8	sdz-8	target	C. elegans	mRNA	no	sdz-8
cdr-2	cdr-2	target	C. elegans	mRNA	no	cdr-2
C52G5.2	C52G5.2	target	C. elegans	mRNA	no	C52G5.2
pyp-1	pyp-1	target	C. elegans	mRNA	no	pyp-1
best-8	best-8	target	C. elegans	mRNA	no	best-8
acs-19	acs-19	target	C. elegans	mRNA	no	acs-19
C34C12.8	C34C12.8	target	C. elegans	mRNA	no	C34C12.8
C33A12.3	C33A12.3	target	C. elegans	mRNA	no	C33A12.3
cytb-5.1	cytb-5.1	target	C. elegans	mRNA	no	cytb-5.1
dlat-2	dlat-2	target	C. elegans	mRNA	no	dlat-2
C29F7.2	C29F7.2	target	C. elegans	mRNA	no	C29F7.2
C27A7.5	C27A7.5	target	C. elegans	mRNA	no	C27A7.5
hrg-7	hrg-7	target	C. elegans	mRNA	no	hrg-7
ril-2	ril-2	target	C. elegans	mRNA	no	ril-2
C14B1.3	C14B1.3	target	C. elegans	mRNA	no	C14B1.3
mrps-22	mrps-22	target	C. elegans	mRNA	no	mrps-22
atp-5	atp-5	target	C. elegans	mRNA	no	atp-5
pho-11	pho-11	target	C. elegans	mRNA	no	pho-11
C01A2.4	C01A2.4	target	C. elegans	mRNA	no	C01A2.4
exos-4.1	exos-4.1	target	C. elegans	mRNA	no	exos-4.1
B0457.6	B0457.6	target	C. elegans	mRNA	no	B0457.6
oac-1	oac-1	target	C. elegans	mRNA	no	oac-1
lcmt-1	lcmt-1	target	C. elegans	mRNA	no	lcmt-1
B0272.3	B0272.3	target	C. elegans	mRNA	no	B0272.3
nfx-1	nfx-1	target	C. elegans	mRNA	no	nfx-1
plin-1	plin-1	target	C. elegans	mRNA	no	plin-1
vem-1	vem-1	target	C. elegans	mRNA	no	vem-1
mtrr-1	mtrr-1	target	C. elegans	mRNA	no	mtrr-1
tag-124	tag-124	target	C. elegans	mRNA	no	tag-124
tag-10	tag-10	target	C. elegans	mRNA	no	tag-10
srr-4	srr-4	target	C. elegans	mRNA	no	srr-4
spr-2	spr-2	target	C. elegans	mRNA	no	spr-2
spp-17	spp-17	target	C. elegans	mRNA	no	spp-17
spp-10	spp-10	target	C. elegans	mRNA	no	spp-10
snr-7	snr-7	target	C. elegans	mRNA	no	snr-7
rps-27	rps-27	target	C. elegans	mRNA	no	rps-27
rpl-22	rpl-22	target	C. elegans	mRNA	no	rpl-22
rop-1	rop-1	target	C. elegans	mRNA	no	rop-1
pyc-1	pyc-1	target	C. elegans	mRNA	no	pyc-1
phb-1	phb-1	target	C. elegans	mRNA	no	phb-1
pgp-14	pgp-14	target	C. elegans	mRNA	no	pgp-14
pgp-9	pgp-9	target	C. elegans	mRNA	no	pgp-9
pgp-5	pgp-5	target	C. elegans	mRNA	no	pgp-5
pgp-4	pgp-4	target	C. elegans	mRNA	no	pgp-4
pgp-1	pgp-1	target	C. elegans	mRNA	no	pgp-1
pat-10	pat-10	target	C. elegans	mRNA	no	pat-10
par-5	par-5	target	C. elegans	mRNA	no	par-5
paf-2	paf-2	target	C. elegans	mRNA	no	paf-2
odc-1	odc-1	target	C. elegans	mRNA	no	odc-1
nxf-1	nxf-1	target	C. elegans	mRNA	no	nxf-1
nhr-135	nhr-135	target	C. elegans	mRNA	no	nhr-135
nhr-105	nhr-105	target	C. elegans	mRNA	no	nhr-105
nhr-68	nhr-68	target	C. elegans	mRNA	no	nhr-68
nex-1	nex-1	target	C. elegans	mRNA	no	nex-1
mrp-2	mrp-2	target	C. elegans	mRNA	no	mrp-2
mel-32	mel-32	target	C. elegans	mRNA	no	mel-32
lys-4	lys-4	target	C. elegans	mRNA	no	lys-4
lbp-6	lbp-6	target	C. elegans	mRNA	no	lbp-6
lbp-3	lbp-3	target	C. elegans	mRNA	no	lbp-3
iars-2	iars-2	target	C. elegans	mRNA	no	iars-2
ins-35	ins-35	target	C. elegans	mRNA	no	ins-35
inf-1	inf-1	target	C. elegans	mRNA	no	inf-1
ifc-1	ifc-1	target	C. elegans	mRNA	no	ifc-1
hsp-70	hsp-70	target	C. elegans	mRNA	no	hsp-70
hsp-16.41	hsp-16.41	target	C. elegans	mRNA	no	hsp-16.41
hsp-12.3	hsp-12.3	target	C. elegans	mRNA	no	hsp-12.3
hoe-1	hoe-1	target	C. elegans	mRNA	no	hoe-1
haf-7	haf-7	target	C. elegans	mRNA	no	haf-7
haf-2	haf-2	target	C. elegans	mRNA	no	haf-2
gst-39	gst-39	target	C. elegans	mRNA	no	gst-39
gst-33	gst-33	target	C. elegans	mRNA	no	gst-33
gst-7	gst-7	target	C. elegans	mRNA	no	gst-7
icl-1	icl-1	target	C. elegans	mRNA	no	icl-1
fat-3	fat-3	target	C. elegans	mRNA	no	fat-3
emb-8	emb-8	target	C. elegans	mRNA	no	emb-8
ech-7	ech-7	target	C. elegans	mRNA	no	ech-7
ech-5	ech-5	target	C. elegans	mRNA	no	ech-5
dif-1	dif-1	target	C. elegans	mRNA	no	dif-1
dhs-18	dhs-18	target	C. elegans	mRNA	no	dhs-18
dhs-14	dhs-14	target	C. elegans	mRNA	no	dhs-14
dhs-6	dhs-6	target	C. elegans	mRNA	no	dhs-6
csq-1	csq-1	target	C. elegans	mRNA	no	csq-1
cpr-5	cpr-5	target	C. elegans	mRNA	no	cpr-5
cpr-4	cpr-4	target	C. elegans	mRNA	no	cpr-4
cpr-1	cpr-1	target	C. elegans	mRNA	no	cpr-1
cpn-4	cpn-4	target	C. elegans	mRNA	no	cpn-4
cng-1	cng-1	target	C. elegans	mRNA	no	cng-1
cct-4	cct-4	target	C. elegans	mRNA	no	cct-4
cyp-14A5	cyp-14A5	target	C. elegans	mRNA	no	cyp-14A5
atp-2	atp-2	target	C. elegans	mRNA	no	atp-2
atgp-1	atgp-1	target	C. elegans	mRNA	no	atgp-1
asm-2	asm-2	target	C. elegans	mRNA	no	asm-2
asg-1	asg-1	target	C. elegans	mRNA	no	asg-1
alh-1	alh-1	target	C. elegans	mRNA	no	alh-1
B0205.13	B0205.13	target	C. elegans	mRNA	no	B0205.13
R08F11.4	R08F11.4	target	C. elegans	mRNA	no	R08F11.4
F57B9.1	F57B9.1	target	C. elegans	mRNA	no	F57B9.1
wdr-12	wdr-12	target	C. elegans	mRNA	no	wdr-12
insc-1	insc-1	target	C. elegans	mRNA	no	insc-1
cyp-33C5	cyp-33C5	target	C. elegans	mRNA	no	cyp-33C5
ddo-2	ddo-2	target	C. elegans	mRNA	no	ddo-2
F14F9.3	F14F9.3	target	C. elegans	mRNA	no	F14F9.3
hach-1	hach-1	target	C. elegans	mRNA	no	hach-1
acdh-1	acdh-1	target	C. elegans	mRNA	no	acdh-1
irg-2	irg-2	target	C. elegans	mRNA	no	irg-2
C37H5.13	C37H5.13	target	C. elegans	mRNA	no	C37H5.13
mpc-1	mpc-1	target	C. elegans	mRNA	no	mpc-1
F54B8.4	F54B8.4	target	C. elegans	mRNA	no	F54B8.4
cpt-5	cpt-5	target	C. elegans	mRNA	no	cpt-5
E03H4.8	E03H4.8	target	C. elegans	mRNA	no	E03H4.8
rmd-2	rmd-2	target	C. elegans	mRNA	no	rmd-2
C08F8.2	C08F8.2	target	C. elegans	mRNA	no	C08F8.2
C05C10.3	C05C10.3	target	C. elegans	mRNA	no	C05C10.3
sars-1	sars-1	target	C. elegans	mRNA	no	sars-1
pgp-13	pgp-13	target	C. elegans	mRNA	no	pgp-13
lys-7	lys-7	target	C. elegans	mRNA	no	lys-7
hsp-60	hsp-60	target	C. elegans	mRNA	no	hsp-60
aps-1	aps-1	target	C. elegans	mRNA	no	aps-1
akt-1	akt-1	target	C. elegans	mRNA	no	akt-1
Y58A7A.3	Y58A7A.3	target	C. elegans	mRNA	no	Y58A7A.3
R08F11.1	R08F11.1	target	C. elegans	mRNA	no	R08F11.1
cebp-1	cebp-1	target	C. elegans	mRNA	no	cebp-1
abhd-5.1	abhd-5.1	target	C. elegans	mRNA	no	abhd-5.1
gtf-2E2	gtf-2E2	target	C. elegans	mRNA	no	gtf-2E2
F31D4.9	F31D4.9	target	C. elegans	mRNA	no	F31D4.9
ubc-1	ubc-1	target	C. elegans	mRNA	no	ubc-1
lbp-2	lbp-2	target	C. elegans	mRNA	no	lbp-2
hsp-16.2	hsp-16.2	target	C. elegans	mRNA	no	hsp-16.2
rrn-3.1	rrn-3.1	target	C. elegans	mRNA	no	rrn-3.1
21ur-6043	21ur-6043	target	C. elegans	mRNA	no	21ur-6043
mir-235	mir-235	target	C. elegans	mRNA	no	mir-235
K07C10.5	K07C10.5	target	C. elegans	mRNA	no	K07C10.5
M163.t1	M163.t1	target	C. elegans	mRNA	no	M163.t1
C06E4.17	C06E4.17	target	C. elegans	mRNA	no	C06E4.17
C02F4.11	C02F4.11	target	C. elegans	mRNA	no	C02F4.11
21ur-3672	21ur-3672	target	C. elegans	mRNA	no	21ur-3672
Y43F8A.8	Y43F8A.8	target	C. elegans	mRNA	no	Y43F8A.8
C43H6.11	C43H6.11	target	C. elegans	mRNA	no	C43H6.11
W05B2.13	W05B2.13	target	C. elegans	mRNA	no	W05B2.13
K05G3.t1	K05G3.t1	target	C. elegans	mRNA	no	K05G3.t1
W03G11.8	W03G11.8	target	C. elegans	mRNA	no	W03G11.8
rhlE nested	rhlE	target	P. aeruginosa	TPs		PA0428 nested
Lpd nested	Lpd	target	P. aeruginosa	TPs		Lpd nested
SucC nested	SucC	target	P. aeruginosa	TPs		SucC nested
PA1895 nested	PA1895	target	P. aeruginosa	TPs		PA1895 nested
GlgP nested	GlgP	target	P. aeruginosa	TPs		GlgP nested
hscA nested	hscA	target	P. aeruginosa	TPs		hscA nested
laf-1 nested	laf-1	target	C. elegans	TPs		laf-1 nested
dld-1 nested	dld-1	target	C. elegans	TPs		dld-1 nested
suca-1 nested	suca-1	target	C. elegans	TPs		suca-1 nested
F55F10.1 nested	F55F10.1 (s)	target	C. elegans	TPs		F55F10.1 nested
pygl-1 nested	pygl-1	target	C. elegans	TPs		pygl-1 nested
hsp-1 nested	hsp-1(s	target	C. elegans	TPs		hsp-1 nested
PA1895 antisense	PA1895	target	P. aeruginosa	Antisense transcript		PA1895
hscA antisense	hscA	target	P. aeruginosa	Antisense transcript		hscA
Y73B3A.17 antisense	Y73B3A.17 (as)	target	C. elegans	Antisense transcript		Y73B3A.17 (as)
hsp-2 antisense	hsp-2(as)	target	C. elegans	Antisense transcript		hsp-2(as)
rsp-2	rsp-2	target	C. elegans	splicing enhancer		rsp-2
RNA C-to-U editing site no homology dat	RNA C-to-U editing site no homology dat	target	C. elegans	RNA editing motif		RNA C-to-U editing site no homology dat
mvm ns2 no homology data	mvm ns2 no homology data	target	C. elegans	no homology		mvm ns2 no homology data
rsp-3	rsp-3	target	C. elegans	splincing enhancer		rsp-3
let-805	let-805	target	C. elegans	motif		let-805
gh-1 no homology data	gh-1 no homology data	target	C. elegans	motif		gh-1 no homology data
rsp4	rsp4	target	C. elegans	motif		rsp4
lin-14	lin-14	target	C. elegans	motif		lin-14
lev-11	lev-11	target	C. elegans	motif		lev-11
tnt-4	tnt-4	target	C. elegans	motif		tnt-4
agr-1	agr-1	target	C. elegans	motif		agr-1
Terminal Oligopyrimidine Tract (TOP)	Terminal Oligopyrimidine Tract (TOP)	target	C. elegans	UTR		Terminal Oligopyrimidine Tract (TOP)
ighg2 no homology data	ighg2 no homology data	target	C. elegans	motif		ighg2 no homology data
bpv-1 no homology data	bpv-1 no homology data	target	C. elegans	motif		bpv-1 no homology data
mrp-6	mrp-6	target	C. elegans	motif		mrp-6
caspase-2, exon 9	caspase-2, exon 9	target	C. elegans	motif		caspase-2, exon 9
N/A	N/A	target	C. elegans	motif		N/A
gh-1 intron 3	gh-1 intron 3	target	C. elegans	motif		gh-1 intron 3
thyroid hormone receptor , exon 9	thyroid hormone receptor , exon 9	target	C. elegans	motif		thyroid hormone receptor , exon 9
beta-tropomyosin exon, 6b	beta-tropomyosin exon, 6b	target	C. elegans	motif		beta-tropomyosin exon, 6b
rsp-4	rsp-4	target	C. elegans	motif		rsp-4
beta-tropomyosin, exon 6b	beta-tropomyosin, exon 6b	target	C. elegans	motif		beta-tropomyosin, exon 6b
RNA C-to-U editing site	RNA C-to-U editing site	target	C. elegans	motif		RNA C-to-U editing site
che-1	che-1	target	C. elegans	motif		che-1
gh exon 5	gh exon 5	target	C. elegans	motif		gh exon 5
beta-globin exon 2	beta-globin exon 2	target	C. elegans	motif		beta-globin exon 2
gh1: growth hormone 1, exon3	gh1: growth hormone 1, exon3	target	C. elegans	motif		gh1: growth hormone 1, exon3
c-src, exon n1	c-src, exon n1	target	C. elegans	motif		c-src, exon n1
tRNA	tRNA	target	C. elegans	tRNA		tRNA motif
sc35 - exonic splicing enhancer	sc35 - exonic splicing enhancer	target	C. elegans	motif		sc35 - exonic splicing enhancer
agrin y, exon 28	agrin y, exon 28	target	C. elegans	motif		agrin y, exon 28
thyroid hormone receptor, exon 9	thyroid hormone receptor, exon 9	target	C. elegans	motif		thyroid hormone receptor, exon 9
ß-tropomyosin, exon 6b	ß-tropomyosin, exon 6b	target	C. elegans	motif		ß-tropomyosin, exon 6b
mvm ns2	mvm ns2	target	C. elegans	motif		mvm ns2
ctnt exon 5	ctnt exon 5	target	C. elegans	motif		ctnt exon 5
asf/sf2 - exonic splicing enhancer	asf/sf2 - exonic splicing enhancer	target	C. elegans	motif		asf/sf2 - exonic splicing enhancer
thyroid hormone receptor exon 9	thyroid hormone receptor exon 9	target	C. elegans	motif		thyroid hormone receptor exon 9
srp55-exonic splicing enhancer	srp55-exonic splicing enhancer	target	C. elegans	motif		srp55-exonic splicing enhancer
fibronectin eda exon	fibronectin eda exon	target	C. elegans	motif		fibronectin eda exon
ighg2 cgamma2 (immunoglobulin heavy chain subclass g2 - cgamma2 gene) - intron 1	ighg2 cgamma2 (immunoglobulin heavy chain subclass g2 - cgamma2 gene) - intron 1	target	C. elegans	motif		ighg2 cgamma2 (immunoglobulin heavy chain subclass g2 - cgamma2 gene) - intron 1
tRNA-Leu	tRNA	target	C. elegans	tRNA		tRNA_Leucine
ctnt, exon 5	ctnt, exon 5	target	C. elegans	motif		ctnt, exon 5
bpv-1 late exon 2	bpv-1 late exon 2	target	C. elegans	motif		bpv-1 late exon 2
gh-1, exon 3	gh-1, exon 3	target	C. elegans	motif		gh-1, exon 3
fn eda	fn eda	target	C. elegans	motif		fn eda
asf/sf2 - exonic splicing enhancer	asf/sf2 - exonic splicing enhancer	target	C. elegans	motif		asf/sf2 - exonic splicing enhancer
β-tropomyosin exon, 6b	β-tropomyosin exon, 6b	target	C. elegans	motif		β-tropomyosin exon, 6b
sex lethal, exon 3	sex lethal, exon 3	target	C. elegans	motif		sex lethal, exon 3
transformer, exon 2	transformer, exon 2	target	C. elegans	motif		transformer, exon 2
P_16	P_16	target	C. elegans	funtional sequence		P_16
tRNA-His	tRNA	target	C. elegans	tRNA		tRNA_histidine
asf/ sf2-exonic splicing enhancer	asf/ sf2-exonic splicing enhancer	target	C. elegans	motif		asf/ sf2-exonic splicing enhancer
tRNA-Pro	tRNA	target	C. elegans	tRNA		tRNA_Proline
tRNA-Ala	tRNA	target	C. elegans	tRNA		tRNA_Alanine
tRNA-Arg	tRNA	target	C. elegans	tRNA		tRNA_Arginine
tRNA-Val	tRNA	target	C. elegans	tRNA		tRNA_Valine
tRNA-Tyr	tRNA	target	C. elegans	tRNA		tRNA_Tyrosine
tRNAi	tRNA	target	C. elegans	tRNA		tRNA_Methionine
tRNA-Lys	tRNA	target	C. elegans	tRNA		tRNA_Lysine
tRNA-Ile	tRNA	target	C. elegans	tRNA		tRNA_Isoleucine
tRNA-Gln	tRNA	target	C. elegans	tRNA		tRNA_Glutamine
cftr, intron 9	cftr, intron 9	target	C. elegans	motif		cftr, intron 9
β-tropomyosin, exon 6b	β-tropomyosin, exon 6b	target	C. elegans	motif		β-tropomyosin, exon 6b
srp55 - exonic splicing enhancer	srp55 - exonic splicing enhancer	target	C. elegans	motif		srp55 - exonic splicing enhancer
tRNA-Leu	tRNA	target	C. elegans	motif		FR402971/transfer_RNA_(tRNA),_CAA_(Leu/L)_Leucine
Musashi binding element (MBE)	Musashi binding element (MBE)	target	C. elegans	motif		Musashi binding element (MBE)
Polyadenylation Signal (PAS)	Polyadenylation Signal (PAS)	target	C. elegans	motif		Polyadenylation Signal (PAS)
hiv-1 tat exon 3	hiv-1 tat exon 3	target	C. elegans	motif		hiv-1 tat exon 3
beta-tm exon 5, 6	beta-tm exon 5, 6	target	C. elegans	motif		beta-tm exon 5, 6
sr protein 9g8 exon 3	sr protein 9g8 exon 3	target	C. elegans	motif		sr protein 9g8 exon 3
xi collagen, exon 6b	xi collagen, exon 6b	target	C. elegans	motif		xi collagen, exon 6b
srp40-exonic splicing enhancer	srp40-exonic splicing enhancer	target	C. elegans	motif		srp40-exonic splicing enhancer
bpv-1 late rna	bpv-1 late rna	target	C. elegans	motif		bpv-1 late rna
gh1:growth hormone 1, intron3	gh1:growth hormone 1, intron3	target	C. elegans	motif		gh1:growth hormone 1, intron3
tRNA	tRNA	target	C. elegans	tRNA		tRNA
tRNA-Phe	tRNA	target	C. elegans	tRNA		tRNA_Phenylalanine
srp40 - exonic splicing enhancer	srp40 - exonic splicing enhancer	target	C. elegans	motif		srp40 - exonic splicing enhancer
caspase-2, exon 9	caspase-2, exon 9	target	C. elegans	motif		caspase-2, exon 9
lecB nested	lecB	constitutive	P. aeruginosa			PAO_10307
PA3459 nested	PA3459	constitutive	P. aeruginosa			PAO_10509
PA3723 nested	PA3723	constitutive	P. aeruginosa			PAO_11336
PA4023nested	PA4023	constitutive	P. aeruginosa			PAO_12312
PA4180nested	PA4180	constitutive	P. aeruginosa			PAO_12637
iciAanti_nested	iciA	constitutive	P. aeruginosa			PAO_12638
PA4498nested	PA4498	constitutive	P. aeruginosa			PAO_13481
PA4507overlapped	PA4507	constitutive	P. aeruginosa			PAO_14122
PA4515nested	PA4515	constitutive	P. aeruginosa			PAO_16915
PA5187nested	PA5187	constitutive	P. aeruginosa			PAO_1694
PA0616nested	PA0616	constitutive	P. aeruginosa			PAO_17225
PA5249 nested	PA5249	constitutive	P. aeruginosa			PAO_1778
PA0630 nested	PA0630	constitutive	P. aeruginosa			PAO_18130
dsbA nested	dsbA	constitutive	P. aeruginosa			PAO_2289
PA0788 nested	PA0788	constitutive	P. aeruginosa			PAO_2356
PA0813 nested	PA0813	constitutive	P. aeruginosa			PAO_3623
PAO_3830 novel	novel	constitutive	P. aeruginosa			PAO_3830
PA1255 overlapped	PA1255	constitutive	P. aeruginosa			PAO_4017
PA1352 antinested	PA1352	constitutive	P. aeruginosa			PAO_405
PA0164 nested	PA0164	constitutive	P. aeruginosa			PAO_4089
PA1402 antinested	PA1402	constitutive	P. aeruginosa			PAO_5585
modC antinested	modC	constitutive	P. aeruginosa			PAO_6120
fusA2 antinested	fusA2	constitutive	P. aeruginosa			PAO_6403
PA2160 nested	PA2160	constitutive	P. aeruginosa			PAO_663
PAO_6819 novel	novel	constitutive	P. aeruginosa			PAO_6819
PAO_7116 novel	novel	constitutive	P. aeruginosa			PAO_7116
PA2483 nested	PA2483	constitutive	P. aeruginosa			PAO_7305
PA2556 antinested	PA2556	constitutive	P. aeruginosa			PAO_7374
PA2572 antinested	PA2572	constitutive	P. aeruginosa			PAO_7469
PA2590 nested	PA2590	constitutive	P. aeruginosa			PAO_858
PA0366 nested	PA0366	constitutive	P. aeruginosa			PAO_8690
pilZanti_nested	pilZ	constitutive	P. aeruginosa			PAO_9364
PAO_13056	wbpM	expressed	P. aeruginosa	si	si	PAO_13056
PAO_14914	PAO_14914	expressed	P. aeruginosa	si	si	PAO_14914
PAO_17689	PAO_17689	expressed	P. aeruginosa	si	si	PAO_17689
PAO_14944	PAO_14944	expressed	P. aeruginosa	si	si	PAO_14944
PAO_1990	PAO_1990	expressed	P. aeruginosa	si	si	PAO_1990
PAO_13100	PAO_13100	expressed	P. aeruginosa	si	si	PAO_13100
PAO_17718	PAO_17718	expressed	P. aeruginosa	si	si	PAO_17718
PAO_13108	PAO_13108	expressed	P. aeruginosa	si	si	PAO_13108
PAO_14936	PAO_14936	expressed	P. aeruginosa	si	si	PAO_14936
PAO_1999	PAO_1999	expressed	P. aeruginosa	si	si	PAO_1999
PAO_13120	PAO_13120	expressed	P. aeruginosa	si	si	PAO_13120
PAO_17731	PAO_17731	expressed	P. aeruginosa	si	si	PAO_17731
PAO_14957	PAO_14957	expressed	P. aeruginosa	si	si	PAO_14957
PAO_1978	PAO_1978	expressed	P. aeruginosa	si	si	PAO_1978
PAO_2008	PAO_2008	expressed	P. aeruginosa	si	si	PAO_2008
PAO_2386	PAO_2386	expressed	P. aeruginosa	si	si	PAO_2386
PAO_13118	PAO_13118	expressed	P. aeruginosa	si	si	PAO_13118
PAO_14925	PAO_14925	expressed	P. aeruginosa	si	si	PAO_14925
PAO_17700	PAO_17700	expressed	P. aeruginosa	si	si	PAO_17700
PAO_13088	PAO_13088	expressed	P. aeruginosa	si	si	PAO_13088
PAO_14304	PAO_14304	expressed	P. aeruginosa	si	si	PAO_14304
PAO_17729	PAO_17729	expressed	P. aeruginosa	si	si	PAO_17729
PAO_14955	PAO_14955	expressed	P. aeruginosa	si	si	PAO_14955
PAO_1980	PAO_1980	expressed	P. aeruginosa	si	si	PAO_1980
PAO_14838	PAO_14838	expressed	P. aeruginosa	si	si	PAO_14838
PAO_17710	PAO_17710	expressed	P. aeruginosa	si	si	PAO_17710
PAO_2018	PAO_2018	expressed	P. aeruginosa	si	si	PAO_2018
PAO_14926	PAO_14926	expressed	P. aeruginosa	si	si	PAO_14926
PAO_2007	PAO_2007	expressed	P. aeruginosa	si	si	PAO_2007
PAO_17708	PAO_17708	expressed	P. aeruginosa	si	si	PAO_17708
PAO_13097	PAO_13097	expressed	P. aeruginosa	si	si	PAO_13097
PAO_14306	PAO_14306	expressed	P. aeruginosa	si	si	PAO_14306
PAO_13089	PAO_13089	expressed	P. aeruginosa	si	si	PAO_13089
PAO_17701	PAO_17701	expressed	P. aeruginosa	si	si	PAO_17701
PAO_8176	PAO_8176	expressed	P. aeruginosa	si	si	PAO_8176
PAO_3217	PAO_3217	expressed	P. aeruginosa	si	si	PAO_3217
PAO_14933	PAO_14933	expressed	P. aeruginosa	si	si	PAO_14933
PAO_15832	PAO_15832	expressed	P. aeruginosa	si	si	PAO_15832
PAO_14948	PAO_14948	expressed	P. aeruginosa	si	si	PAO_14948
PAO_13111	PAO_13111	expressed	P. aeruginosa	si	si	PAO_13111
PAO_17722	PAO_17722	expressed	P. aeruginosa	si	si	PAO_17722
PAO_1987	PAO_1987	expressed	P. aeruginosa	si	si	PAO_1987

## Sheet: edge_list_gephi
Source	Target	Weight	Type	Inhibitory/Activating	Interaction_putative_mechanism
rhlE nested	laf-1		Undirected	competing	common TPs mimicking/homeostasis
Lpd nested	dld-1		Undirected	competing	common TPs mimicking/homeostasis
SucC nested	suca-1		Undirected	competing	common TPs mimicking/homeostasis
PA1895 nested	F55F10.1		Undirected	competing	common TPs mimicking/homeostasis
GlgP nested	pygl-1		Undirected	competing	common TPs mimicking/homeostasis
hscA nested	hsp-1		Undirected	competing	common TPs mimicking/homeostasis
PA1895 antisense	Y73B3A.17		Undirected	inhibitory	antisense
hscA antisense	hsp-2		Undirected	inhibitory	antisense
tRNA-Ala nested	F12E12.11		Directed	inhibitory	miRNA-like
tRNA-Ala nested	C01B10.11		Directed	inhibitory	miRNA-like
tRNA-Ala nested	K02E11.10		Directed	inhibitory	miRNA-like
tRNA-Ala nested	F43C1.7		Directed	inhibitory	miRNA-like
tRNA-Ala nested	rpl-41.2		Directed	inhibitory	miRNA-like
tRNA-Ala nested	ZK697.14		Directed	inhibitory	miRNA-like
tRNA-Ala nested	tomm-7		Directed	inhibitory	miRNA-like
tRNA-Ala nested	mtx-2		Directed	inhibitory	miRNA-like
tRNA-Ala nested	Y82E9BR.18		Directed	inhibitory	miRNA-like
tRNA-Ala nested	clec-210		Directed	inhibitory	miRNA-like
tRNA-Ala nested	Y73C8B.1		Directed	inhibitory	miRNA-like
tRNA-Ala nested	Y58A7A.5		Directed	inhibitory	miRNA-like
tRNA-Ala nested	Y54F10AM.5		Directed	inhibitory	miRNA-like
tRNA-Ala nested	Y54E10A.17		Directed	inhibitory	miRNA-like
tRNA-Ala nested	Y53G8B.2		Directed	inhibitory	miRNA-like
tRNA-Ala nested	Y50D4B.2		Directed	inhibitory	miRNA-like
tRNA-Ala nested	ugt-29		Directed	inhibitory	miRNA-like
tRNA-Ala nested	nsun-2		Directed	inhibitory	miRNA-like
tRNA-Ala nested	nhr-237		Directed	inhibitory	miRNA-like
tRNA-Ala nested	Y22D7AL.10		Directed	inhibitory	miRNA-like
tRNA-Ala nested	tomm-22		Directed	inhibitory	miRNA-like
tRNA-Ala nested	W03G1.5		Directed	inhibitory	miRNA-like
tRNA-Ala nested	W02F12.2		Directed	inhibitory	miRNA-like
tRNA-Ala nested	pfd-5		Directed	inhibitory	miRNA-like
tRNA-Ala nested	cyp-33C8		Directed	inhibitory	miRNA-like
tRNA-Ala nested	hrg-1		Directed	inhibitory	miRNA-like
tRNA-Ala nested	M60.7		Directed	inhibitory	miRNA-like
tRNA-Ala nested	M04F3.4		Directed	inhibitory	miRNA-like
tRNA-Ala nested	cest-34		Directed	inhibitory	miRNA-like
tRNA-Ala nested	K09F6.10		Directed	inhibitory	miRNA-like
tRNA-Ala nested	K08D9.4		Directed	inhibitory	miRNA-like
tRNA-Ala nested	acdh-3		Directed	inhibitory	miRNA-like
tRNA-Ala nested	ahcy-1		Directed	inhibitory	miRNA-like
tRNA-Ala nested	ubxn-6		Directed	inhibitory	miRNA-like
tRNA-Ala nested	F59B1.8		Directed	inhibitory	miRNA-like
tRNA-Ala nested	acox-3		Directed	inhibitory	miRNA-like
tRNA-Ala nested	ipgm-1		Directed	inhibitory	miRNA-like
tRNA-Ala nested	cest-27		Directed	inhibitory	miRNA-like
tRNA-Ala nested	pmt-2		Directed	inhibitory	miRNA-like
tRNA-Ala nested	cutl-20		Directed	inhibitory	miRNA-like
tRNA-Ala nested	F53C3.6		Directed	inhibitory	miRNA-like
tRNA-Ala nested	F52E4.5		Directed	inhibitory	miRNA-like
tRNA-Ala nested	nhr-142		Directed	inhibitory	miRNA-like
tRNA-Ala nested	cyp-33C4		Directed	inhibitory	miRNA-like
tRNA-Ala nested	F41G3.10		Directed	inhibitory	miRNA-like
tRNA-Ala nested	ctsa-1.1		Directed	inhibitory	miRNA-like
tRNA-Ala nested	cyp-33C3		Directed	inhibitory	miRNA-like
tRNA-Ala nested	F28C10.3		Directed	inhibitory	miRNA-like
tRNA-Ala nested	asp-13		Directed	inhibitory	miRNA-like
tRNA-Ala nested	acdh-9		Directed	inhibitory	miRNA-like
tRNA-Ala nested	ilys-5		Directed	inhibitory	miRNA-like
tRNA-Ala nested	slc-17.5		Directed	inhibitory	miRNA-like
tRNA-Ala nested	F18E3.11		Directed	inhibitory	miRNA-like
tRNA-Ala nested	nhr-178		Directed	inhibitory	miRNA-like
tRNA-Ala nested	F15E6.6		Directed	inhibitory	miRNA-like
tRNA-Ala nested	F14F9.4		Directed	inhibitory	miRNA-like
tRNA-Ala nested	F13C5.1		Directed	inhibitory	miRNA-like
tRNA-Ala nested	farl-11		Directed	inhibitory	miRNA-like
tRNA-Ala nested	nspb-12		Directed	inhibitory	miRNA-like
tRNA-Ala nested	F09E5.3		Directed	inhibitory	miRNA-like
tRNA-Ala nested	F07F6.8		Directed	inhibitory	miRNA-like
tRNA-Ala nested	DC2.5		Directed	inhibitory	miRNA-like
tRNA-Ala nested	nap-1		Directed	inhibitory	miRNA-like
tRNA-Ala nested	D2063.1		Directed	inhibitory	miRNA-like
tRNA-Ala nested	zhit-1		Directed	inhibitory	miRNA-like
tRNA-Ala nested	mboa-3		Directed	inhibitory	miRNA-like
tRNA-Ala nested	C49G7.3		Directed	inhibitory	miRNA-like
tRNA-Ala nested	ugt-24		Directed	inhibitory	miRNA-like
tRNA-Ala nested	acer-1		Directed	inhibitory	miRNA-like
tRNA-Ala nested	abhd-5.2		Directed	inhibitory	miRNA-like
tRNA-Ala nested	C35B1.2		Directed	inhibitory	miRNA-like
tRNA-Ala nested	C29F5.1		Directed	inhibitory	miRNA-like
tRNA-Ala nested	C23H5.8		Directed	inhibitory	miRNA-like
tRNA-Ala nested	C17C3.1		Directed	inhibitory	miRNA-like
tRNA-Ala nested	C15B12.8		Directed	inhibitory	miRNA-like
tRNA-Ala nested	cyp-33A1		Directed	inhibitory	miRNA-like
tRNA-Ala nested	ugt-28		Directed	inhibitory	miRNA-like
tRNA-Ala nested	irg-1		Directed	inhibitory	miRNA-like
tRNA-Ala nested	bath-44		Directed	inhibitory	miRNA-like
tRNA-Ala nested	sams-3		Directed	inhibitory	miRNA-like
tRNA-Ala nested	mthf-1		Directed	inhibitory	miRNA-like
tRNA-Ala nested	best-3		Directed	inhibitory	miRNA-like
tRNA-Ala nested	algn-11		Directed	inhibitory	miRNA-like
tRNA-Ala nested	nfs-1		Directed	inhibitory	miRNA-like
tRNA-Ala nested	K08E5.1		Directed	inhibitory	miRNA-like
tRNA-Ala nested	cyp-13A10		Directed	inhibitory	miRNA-like
tRNA-Ala nested	ZK896.5		Directed	inhibitory	miRNA-like
tRNA-Ala nested	ZK822.5		Directed	inhibitory	miRNA-like
tRNA-Ala nested	riok-3		Directed	inhibitory	miRNA-like
tRNA-Ala nested	lips-6		Directed	inhibitory	miRNA-like
tRNA-Ala nested	atfs-1		Directed	inhibitory	miRNA-like
tRNA-Ala nested	Y73F4A.2		Directed	inhibitory	miRNA-like
tRNA-Ala nested	abhd-3.1		Directed	inhibitory	miRNA-like
tRNA-Ala nested	mrps-7		Directed	inhibitory	miRNA-like
tRNA-Ala nested	daf-22		Directed	inhibitory	miRNA-like
tRNA-Ala nested	ttr-24		Directed	inhibitory	miRNA-like
tRNA-Ala nested	Y46G5A.18		Directed	inhibitory	miRNA-like
tRNA-Ala nested	hphd-1		Directed	inhibitory	miRNA-like
tRNA-Ala nested	mecr-1		Directed	inhibitory	miRNA-like
tRNA-Ala nested	R107.5		Directed	inhibitory	miRNA-like
tRNA-Ala nested	R53.4		Directed	inhibitory	miRNA-like
tRNA-Ala nested	pck-2		Directed	inhibitory	miRNA-like
tRNA-Ala nested	prdx-3		Directed	inhibitory	miRNA-like
tRNA-Ala nested	R07E3.1		Directed	inhibitory	miRNA-like
tRNA-Ala nested	R04B5.6		Directed	inhibitory	miRNA-like
tRNA-Ala nested	metr-1		Directed	inhibitory	miRNA-like
tRNA-Ala nested	ugt-62		Directed	inhibitory	miRNA-like
tRNA-Ala nested	taap-1		Directed	inhibitory	miRNA-like
tRNA-Ala nested	sodh-1		Directed	inhibitory	miRNA-like
tRNA-Ala nested	nipi-3		Directed	inhibitory	miRNA-like
tRNA-Ala nested	nol-56		Directed	inhibitory	miRNA-like
tRNA-Ala nested	endu-1		Directed	inhibitory	miRNA-like
tRNA-Ala nested	K01D12.10		Directed	inhibitory	miRNA-like
tRNA-Ala nested	cri-3		Directed	inhibitory	miRNA-like
tRNA-Ala nested	F54D5.12		Directed	inhibitory	miRNA-like
tRNA-Ala nested	F53F4.10		Directed	inhibitory	miRNA-like
tRNA-Ala nested	acaa-2		Directed	inhibitory	miRNA-like
tRNA-Ala nested	drd-1		Directed	inhibitory	miRNA-like
tRNA-Ala nested	argk-1		Directed	inhibitory	miRNA-like
tRNA-Ala nested	F44A6.5		Directed	inhibitory	miRNA-like
tRNA-Ala nested	F32D8.12		Directed	inhibitory	miRNA-like
tRNA-Ala nested	acs-2		Directed	inhibitory	miRNA-like
tRNA-Ala nested	F27D4.1		Directed	inhibitory	miRNA-like
tRNA-Ala nested	F22B5.4		Directed	inhibitory	miRNA-like
tRNA-Ala nested	cyp-13A12		Directed	inhibitory	miRNA-like
tRNA-Ala nested	vwa-8		Directed	inhibitory	miRNA-like
tRNA-Ala nested	ttr-21		Directed	inhibitory	miRNA-like
tRNA-Ala nested	F09B12.3		Directed	inhibitory	miRNA-like
tRNA-Ala nested	clec-57		Directed	inhibitory	miRNA-like
tRNA-Ala nested	acox-1.3		Directed	inhibitory	miRNA-like
tRNA-Ala nested	mrpl-44		Directed	inhibitory	miRNA-like
tRNA-Ala nested	oac-13		Directed	inhibitory	miRNA-like
tRNA-Ala nested	DH11.2		Directed	inhibitory	miRNA-like
tRNA-Ala nested	nspc-20		Directed	inhibitory	miRNA-like
tRNA-Ala nested	sdz-8		Directed	inhibitory	miRNA-like
tRNA-Ala nested	cdr-2		Directed	inhibitory	miRNA-like
tRNA-Ala nested	C52G5.2		Directed	inhibitory	miRNA-like
tRNA-Ala nested	pyp-1		Directed	inhibitory	miRNA-like
tRNA-Ala nested	best-8		Directed	inhibitory	miRNA-like
tRNA-Ala nested	acs-19		Directed	inhibitory	miRNA-like
tRNA-Ala nested	C34C12.8		Directed	inhibitory	miRNA-like
tRNA-Ala nested	C33A12.3		Directed	inhibitory	miRNA-like
tRNA-Ala nested	cytb-5.1		Directed	inhibitory	miRNA-like
tRNA-Ala nested	dlat-2		Directed	inhibitory	miRNA-like
tRNA-Ala nested	C29F7.2		Directed	inhibitory	miRNA-like
tRNA-Ala nested	C27A7.5		Directed	inhibitory	miRNA-like
tRNA-Ala nested	hrg-7		Directed	inhibitory	miRNA-like
tRNA-Ala nested	ril-2		Directed	inhibitory	miRNA-like
tRNA-Ala nested	C14B1.3		Directed	inhibitory	miRNA-like
tRNA-Ala nested	mrps-22		Directed	inhibitory	miRNA-like
tRNA-Ala nested	atp-5		Directed	inhibitory	miRNA-like
tRNA-Ala nested	pho-11		Directed	inhibitory	miRNA-like
tRNA-Ala nested	C01A2.4		Directed	inhibitory	miRNA-like
tRNA-Ala nested	exos-4.1		Directed	inhibitory	miRNA-like
tRNA-Ala nested	B0457.6		Directed	inhibitory	miRNA-like
tRNA-Ala nested	oac-1		Directed	inhibitory	miRNA-like
tRNA-Ala nested	lcmt-1		Directed	inhibitory	miRNA-like
tRNA-Ala nested	B0272.3		Directed	inhibitory	miRNA-like
tRNA-Ala nested	nfx-1		Directed	inhibitory	miRNA-like
tRNA-Ala nested	plin-1		Directed	inhibitory	miRNA-like
tRNA-Ala nested	vem-1		Directed	inhibitory	miRNA-like
tRNA-Ala nested	mtrr-1		Directed	inhibitory	miRNA-like
tRNA-Ala nested	tag-124		Directed	inhibitory	miRNA-like
tRNA-Ala nested	tag-10		Directed	inhibitory	miRNA-like
tRNA-Ala nested	srr-4		Directed	inhibitory	miRNA-like
tRNA-Ala nested	spr-2		Directed	inhibitory	miRNA-like
tRNA-Ala nested	spp-17		Directed	inhibitory	miRNA-like
tRNA-Ala nested	spp-10		Directed	inhibitory	miRNA-like
tRNA-Ala nested	snr-7		Directed	inhibitory	miRNA-like
tRNA-Ala nested	rps-27		Directed	inhibitory	miRNA-like
tRNA-Ala nested	rpl-22		Directed	inhibitory	miRNA-like
tRNA-Ala nested	rop-1		Directed	inhibitory	miRNA-like
tRNA-Ala nested	pyc-1		Directed	inhibitory	miRNA-like
tRNA-Ala nested	phb-1		Directed	inhibitory	miRNA-like
tRNA-Ala nested	pgp-14		Directed	inhibitory	miRNA-like
tRNA-Ala nested	pgp-9		Directed	inhibitory	miRNA-like
tRNA-Ala nested	pgp-5		Directed	inhibitory	miRNA-like
tRNA-Ala nested	pgp-4		Directed	inhibitory	miRNA-like
tRNA-Ala nested	pgp-1		Directed	inhibitory	miRNA-like
tRNA-Ala nested	pat-10		Directed	inhibitory	miRNA-like
tRNA-Ala nested	par-5		Directed	inhibitory	miRNA-like
tRNA-Ala nested	paf-2		Directed	inhibitory	miRNA-like
tRNA-Ala nested	odc-1		Directed	inhibitory	miRNA-like
tRNA-Ala nested	nxf-1		Directed	inhibitory	miRNA-like
tRNA-Ala nested	nhr-135		Directed	inhibitory	miRNA-like
tRNA-Ala nested	nhr-105		Directed	inhibitory	miRNA-like
tRNA-Ala nested	nhr-68		Directed	inhibitory	miRNA-like
tRNA-Ala nested	nex-1		Directed	inhibitory	miRNA-like
tRNA-Ala nested	mrp-2		Directed	inhibitory	miRNA-like
tRNA-Ala nested	mel-32		Directed	inhibitory	miRNA-like
tRNA-Ala nested	lys-4		Directed	inhibitory	miRNA-like
tRNA-Ala nested	lbp-6		Directed	inhibitory	miRNA-like
tRNA-Ala nested	lbp-3		Directed	inhibitory	miRNA-like
tRNA-Ala nested	iars-2		Directed	inhibitory	miRNA-like
tRNA-Ala nested	ins-35		Directed	inhibitory	miRNA-like
tRNA-Ala nested	inf-1		Directed	inhibitory	miRNA-like
tRNA-Ala nested	ifc-1		Directed	inhibitory	miRNA-like
tRNA-Ala nested	hsp-70		Directed	inhibitory	miRNA-like
tRNA-Ala nested	hsp-16.41		Directed	inhibitory	miRNA-like
tRNA-Ala nested	hsp-12.3		Directed	inhibitory	miRNA-like
tRNA-Ala nested	hoe-1		Directed	inhibitory	miRNA-like
tRNA-Ala nested	haf-7		Directed	inhibitory	miRNA-like
tRNA-Ala nested	haf-2		Directed	inhibitory	miRNA-like
tRNA-Ala nested	gst-39		Directed	inhibitory	miRNA-like
tRNA-Ala nested	gst-33		Directed	inhibitory	miRNA-like
tRNA-Ala nested	gst-7		Directed	inhibitory	miRNA-like
tRNA-Ala nested	icl-1		Directed	inhibitory	miRNA-like
tRNA-Ala nested	fat-3		Directed	inhibitory	miRNA-like
tRNA-Ala nested	emb-8		Directed	inhibitory	miRNA-like
tRNA-Ala nested	ech-7		Directed	inhibitory	miRNA-like
tRNA-Ala nested	ech-5		Directed	inhibitory	miRNA-like
tRNA-Ala nested	dif-1		Directed	inhibitory	miRNA-like
tRNA-Ala nested	dhs-18		Directed	inhibitory	miRNA-like
tRNA-Ala nested	dhs-14		Directed	inhibitory	miRNA-like
tRNA-Ala nested	dhs-6		Directed	inhibitory	miRNA-like
tRNA-Ala nested	csq-1		Directed	inhibitory	miRNA-like
tRNA-Ala nested	cpr-5		Directed	inhibitory	miRNA-like
tRNA-Ala nested	cpr-4		Directed	inhibitory	miRNA-like
tRNA-Ala nested	cpr-1		Directed	inhibitory	miRNA-like
tRNA-Ala nested	cpn-4		Directed	inhibitory	miRNA-like
tRNA-Ala nested	cng-1		Directed	inhibitory	miRNA-like
tRNA-Ala nested	cct-4		Directed	inhibitory	miRNA-like
tRNA-Ala nested	cyp-14A5		Directed	inhibitory	miRNA-like
tRNA-Ala nested	atp-2		Directed	inhibitory	miRNA-like
tRNA-Ala nested	atgp-1		Directed	inhibitory	miRNA-like
tRNA-Ala nested	asm-2		Directed	inhibitory	miRNA-like
tRNA-Ala nested	asg-1		Directed	inhibitory	miRNA-like
tRNA-Ala nested	alh-1		Directed	inhibitory	miRNA-like
tRNA-Gln nested	F12E12.11		Directed	inhibitory	miRNA-like
tRNA-Gln nested	B0205.13		Directed	inhibitory	miRNA-like
tRNA-Gln nested	C01B10.11		Directed	inhibitory	miRNA-like
tRNA-Gln nested	K02E11.10		Directed	inhibitory	miRNA-like
tRNA-Gln nested	ZK697.14		Directed	inhibitory	miRNA-like
tRNA-Gln nested	tomm-7		Directed	inhibitory	miRNA-like
tRNA-Gln nested	Y82E9BR.18		Directed	inhibitory	miRNA-like
tRNA-Gln nested	clec-210		Directed	inhibitory	miRNA-like
tRNA-Gln nested	Y73C8B.1		Directed	inhibitory	miRNA-like
tRNA-Gln nested	Y58A7A.5		Directed	inhibitory	miRNA-like
tRNA-Gln nested	Y54E10A.17		Directed	inhibitory	miRNA-like
tRNA-Gln nested	Y53G8B.2		Directed	inhibitory	miRNA-like
tRNA-Gln nested	Y50D4B.2		Directed	inhibitory	miRNA-like
tRNA-Gln nested	ugt-29		Directed	inhibitory	miRNA-like
tRNA-Gln nested	nsun-2		Directed	inhibitory	miRNA-like
tRNA-Gln nested	nhr-237		Directed	inhibitory	miRNA-like
tRNA-Gln nested	W03G1.5		Directed	inhibitory	miRNA-like
tRNA-Gln nested	W02F12.2		Directed	inhibitory	miRNA-like
tRNA-Gln nested	pfd-5		Directed	inhibitory	miRNA-like
tRNA-Gln nested	R08F11.4		Directed	inhibitory	miRNA-like
tRNA-Gln nested	hrg-1		Directed	inhibitory	miRNA-like
tRNA-Gln nested	M04F3.4		Directed	inhibitory	miRNA-like
tRNA-Gln nested	cest-34		Directed	inhibitory	miRNA-like
tRNA-Gln nested	K09F6.10		Directed	inhibitory	miRNA-like
tRNA-Gln nested	K08D9.4		Directed	inhibitory	miRNA-like
tRNA-Gln nested	acdh-3		Directed	inhibitory	miRNA-like
tRNA-Gln nested	ahcy-1		Directed	inhibitory	miRNA-like
tRNA-Gln nested	ubxn-6		Directed	inhibitory	miRNA-like
tRNA-Gln nested	F59B1.8		Directed	inhibitory	miRNA-like
tRNA-Gln nested	acox-3		Directed	inhibitory	miRNA-like
tRNA-Gln nested	ipgm-1		Directed	inhibitory	miRNA-like
tRNA-Gln nested	F57B9.1		Directed	inhibitory	miRNA-like
tRNA-Gln nested	cest-27		Directed	inhibitory	miRNA-like
tRNA-Gln nested	wdr-12		Directed	inhibitory	miRNA-like
tRNA-Gln nested	pmt-2		Directed	inhibitory	miRNA-like
tRNA-Gln nested	cutl-20		Directed	inhibitory	miRNA-like
tRNA-Gln nested	F53C3.6		Directed	inhibitory	miRNA-like
tRNA-Gln nested	F52E4.5		Directed	inhibitory	miRNA-like
tRNA-Gln nested	nhr-142		Directed	inhibitory	miRNA-like
tRNA-Gln nested	cyp-33C4		Directed	inhibitory	miRNA-like
tRNA-Gln nested	insc-1		Directed	inhibitory	miRNA-like
tRNA-Gln nested	ctsa-1.1		Directed	inhibitory	miRNA-like
tRNA-Gln nested	cyp-33C5		Directed	inhibitory	miRNA-like
tRNA-Gln nested	F28C10.3		Directed	inhibitory	miRNA-like
tRNA-Gln nested	asp-13		Directed	inhibitory	miRNA-like
tRNA-Gln nested	acdh-9		Directed	inhibitory	miRNA-like
tRNA-Gln nested	ilys-5		Directed	inhibitory	miRNA-like
tRNA-Gln nested	slc-17.5		Directed	inhibitory	miRNA-like
tRNA-Gln nested	ddo-2		Directed	inhibitory	miRNA-like
tRNA-Gln nested	nhr-178		Directed	inhibitory	miRNA-like
tRNA-Gln nested	F15E6.6		Directed	inhibitory	miRNA-like
tRNA-Gln nested	F14F9.3		Directed	inhibitory	miRNA-like
tRNA-Gln nested	F13C5.1		Directed	inhibitory	miRNA-like
tRNA-Gln nested	farl-11		Directed	inhibitory	miRNA-like
tRNA-Gln nested	hach-1		Directed	inhibitory	miRNA-like
tRNA-Gln nested	F09E5.3		Directed	inhibitory	miRNA-like
tRNA-Gln nested	F07F6.8		Directed	inhibitory	miRNA-like
tRNA-Gln nested	DC2.5		Directed	inhibitory	miRNA-like
tRNA-Gln nested	D2063.1		Directed	inhibitory	miRNA-like
tRNA-Gln nested	zhit-1		Directed	inhibitory	miRNA-like
tRNA-Gln nested	acdh-1		Directed	inhibitory	miRNA-like
tRNA-Gln nested	mboa-3		Directed	inhibitory	miRNA-like
tRNA-Gln nested	irg-2		Directed	inhibitory	miRNA-like
tRNA-Gln nested	ugt-24		Directed	inhibitory	miRNA-like
tRNA-Gln nested	acer-1		Directed	inhibitory	miRNA-like
tRNA-Gln nested	C37H5.13		Directed	inhibitory	miRNA-like
tRNA-Gln nested	C35B1.2		Directed	inhibitory	miRNA-like
tRNA-Gln nested	C29F5.1		Directed	inhibitory	miRNA-like
tRNA-Gln nested	C23H5.8		Directed	inhibitory	miRNA-like
tRNA-Gln nested	C17C3.1		Directed	inhibitory	miRNA-like
tRNA-Gln nested	C15B12.8		Directed	inhibitory	miRNA-like
tRNA-Gln nested	ugt-28		Directed	inhibitory	miRNA-like
tRNA-Gln nested	bath-44		Directed	inhibitory	miRNA-like
tRNA-Gln nested	sams-3		Directed	inhibitory	miRNA-like
tRNA-Gln nested	mthf-1		Directed	inhibitory	miRNA-like
tRNA-Gln nested	best-3		Directed	inhibitory	miRNA-like
tRNA-Gln nested	algn-11		Directed	inhibitory	miRNA-like
tRNA-Gln nested	K08E5.1		Directed	inhibitory	miRNA-like
tRNA-Gln nested	cyp-13A10		Directed	inhibitory	miRNA-like
tRNA-Gln nested	ZK896.5		Directed	inhibitory	miRNA-like
tRNA-Gln nested	ZK822.5		Directed	inhibitory	miRNA-like
tRNA-Gln nested	riok-3		Directed	inhibitory	miRNA-like
tRNA-Gln nested	atfs-1		Directed	inhibitory	miRNA-like
tRNA-Gln nested	Y73F4A.2		Directed	inhibitory	miRNA-like
tRNA-Gln nested	abhd-3.1		Directed	inhibitory	miRNA-like
tRNA-Gln nested	mrps-7		Directed	inhibitory	miRNA-like
tRNA-Gln nested	daf-22		Directed	inhibitory	miRNA-like
tRNA-Gln nested	ttr-24		Directed	inhibitory	miRNA-like
tRNA-Gln nested	Y46G5A.18		Directed	inhibitory	miRNA-like
tRNA-Gln nested	hphd-1		Directed	inhibitory	miRNA-like
tRNA-Gln nested	mecr-1		Directed	inhibitory	miRNA-like
tRNA-Gln nested	R107.5		Directed	inhibitory	miRNA-like
tRNA-Gln nested	pck-2		Directed	inhibitory	miRNA-like
tRNA-Gln nested	mpc-1		Directed	inhibitory	miRNA-like
tRNA-Gln nested	R07E3.1		Directed	inhibitory	miRNA-like
tRNA-Gln nested	R04B5.6		Directed	inhibitory	miRNA-like
tRNA-Gln nested	metr-1		Directed	inhibitory	miRNA-like
tRNA-Gln nested	ugt-62		Directed	inhibitory	miRNA-like
tRNA-Gln nested	taap-1		Directed	inhibitory	miRNA-like
tRNA-Gln nested	sodh-1		Directed	inhibitory	miRNA-like
tRNA-Gln nested	nol-56		Directed	inhibitory	miRNA-like
tRNA-Gln nested	endu-1		Directed	inhibitory	miRNA-like
tRNA-Gln nested	K01D12.10		Directed	inhibitory	miRNA-like
tRNA-Gln nested	cri-3		Directed	inhibitory	miRNA-like
tRNA-Gln nested	F54D5.12		Directed	inhibitory	miRNA-like
tRNA-Gln nested	F54B8.4		Directed	inhibitory	miRNA-like
tRNA-Gln nested	F53F4.10		Directed	inhibitory	miRNA-like
tRNA-Gln nested	acaa-2		Directed	inhibitory	miRNA-like
tRNA-Gln nested	drd-1		Directed	inhibitory	miRNA-like
tRNA-Gln nested	argk-1		Directed	inhibitory	miRNA-like
tRNA-Gln nested	F32D8.12		Directed	inhibitory	miRNA-like
tRNA-Gln nested	acs-2		Directed	inhibitory	miRNA-like
tRNA-Gln nested	F27D4.1		Directed	inhibitory	miRNA-like
tRNA-Gln nested	cyp-13A12		Directed	inhibitory	miRNA-like
tRNA-Gln nested	vwa-8		Directed	inhibitory	miRNA-like
tRNA-Gln nested	cpt-5		Directed	inhibitory	miRNA-like
tRNA-Gln nested	F09B12.3		Directed	inhibitory	miRNA-like
tRNA-Gln nested	clec-57		Directed	inhibitory	miRNA-like
tRNA-Gln nested	acox-1.3		Directed	inhibitory	miRNA-like
tRNA-Gln nested	mrpl-44		Directed	inhibitory	miRNA-like
tRNA-Gln nested	E03H4.8		Directed	inhibitory	miRNA-like
tRNA-Gln nested	DH11.2		Directed	inhibitory	miRNA-like
tRNA-Gln nested	sdz-8		Directed	inhibitory	miRNA-like
tRNA-Gln nested	cdr-2		Directed	inhibitory	miRNA-like
tRNA-Gln nested	C52G5.2		Directed	inhibitory	miRNA-like
tRNA-Gln nested	best-8		Directed	inhibitory	miRNA-like
tRNA-Gln nested	acs-19		Directed	inhibitory	miRNA-like
tRNA-Gln nested	C34C12.8		Directed	inhibitory	miRNA-like
tRNA-Gln nested	C33A12.3		Directed	inhibitory	miRNA-like
tRNA-Gln nested	cytb-5.1		Directed	inhibitory	miRNA-like
tRNA-Gln nested	dlat-2		Directed	inhibitory	miRNA-like
tRNA-Gln nested	C29F7.2		Directed	inhibitory	miRNA-like
tRNA-Gln nested	rmd-2		Directed	inhibitory	miRNA-like
tRNA-Gln nested	C27A7.5		Directed	inhibitory	miRNA-like
tRNA-Gln nested	hrg-7		Directed	inhibitory	miRNA-like
tRNA-Gln nested	ril-2		Directed	inhibitory	miRNA-like
tRNA-Gln nested	C14B1.3		Directed	inhibitory	miRNA-like
tRNA-Gln nested	mrps-22		Directed	inhibitory	miRNA-like
tRNA-Gln nested	C08F8.2		Directed	inhibitory	miRNA-like
tRNA-Gln nested	C05C10.3		Directed	inhibitory	miRNA-like
tRNA-Gln nested	oac-1		Directed	inhibitory	miRNA-like
tRNA-Gln nested	lcmt-1		Directed	inhibitory	miRNA-like
tRNA-Gln nested	B0272.3		Directed	inhibitory	miRNA-like
tRNA-Gln nested	nfx-1		Directed	inhibitory	miRNA-like
tRNA-Gln nested	vem-1		Directed	inhibitory	miRNA-like
tRNA-Gln nested	mtrr-1		Directed	inhibitory	miRNA-like
tRNA-Gln nested	tag-124		Directed	inhibitory	miRNA-like
tRNA-Gln nested	tag-10		Directed	inhibitory	miRNA-like
tRNA-Gln nested	sars-1		Directed	inhibitory	miRNA-like
tRNA-Gln nested	srr-4		Directed	inhibitory	miRNA-like
tRNA-Gln nested	spr-2		Directed	inhibitory	miRNA-like
tRNA-Gln nested	spp-10		Directed	inhibitory	miRNA-like
tRNA-Gln nested	pyc-1		Directed	inhibitory	miRNA-like
tRNA-Gln nested	pgp-13		Directed	inhibitory	miRNA-like
tRNA-Gln nested	pgp-9		Directed	inhibitory	miRNA-like
tRNA-Gln nested	pgp-5		Directed	inhibitory	miRNA-like
tRNA-Gln nested	pgp-4		Directed	inhibitory	miRNA-like
tRNA-Gln nested	pgp-1		Directed	inhibitory	miRNA-like
tRNA-Gln nested	par-5		Directed	inhibitory	miRNA-like
tRNA-Gln nested	paf-2		Directed	inhibitory	miRNA-like
tRNA-Gln nested	odc-1		Directed	inhibitory	miRNA-like
tRNA-Gln nested	nxf-1		Directed	inhibitory	miRNA-like
tRNA-Gln nested	nhr-135		Directed	inhibitory	miRNA-like
tRNA-Gln nested	nhr-68		Directed	inhibitory	miRNA-like
tRNA-Gln nested	nex-1		Directed	inhibitory	miRNA-like
tRNA-Gln nested	mrp-2		Directed	inhibitory	miRNA-like
tRNA-Gln nested	mel-32		Directed	inhibitory	miRNA-like
tRNA-Gln nested	lys-7		Directed	inhibitory	miRNA-like
tRNA-Gln nested	lys-4		Directed	inhibitory	miRNA-like
tRNA-Gln nested	lbp-6		Directed	inhibitory	miRNA-like
tRNA-Gln nested	lbp-3		Directed	inhibitory	miRNA-like
tRNA-Gln nested	iars-2		Directed	inhibitory	miRNA-like
tRNA-Gln nested	ifc-1		Directed	inhibitory	miRNA-like
tRNA-Gln nested	hsp-70		Directed	inhibitory	miRNA-like
tRNA-Gln nested	hsp-60		Directed	inhibitory	miRNA-like
tRNA-Gln nested	hsp-16.41		Directed	inhibitory	miRNA-like
tRNA-Gln nested	hsp-12.3		Directed	inhibitory	miRNA-like
tRNA-Gln nested	haf-7		Directed	inhibitory	miRNA-like
tRNA-Gln nested	gst-39		Directed	inhibitory	miRNA-like
tRNA-Gln nested	gst-7		Directed	inhibitory	miRNA-like
tRNA-Gln nested	icl-1		Directed	inhibitory	miRNA-like
tRNA-Gln nested	fat-3		Directed	inhibitory	miRNA-like
tRNA-Gln nested	emb-8		Directed	inhibitory	miRNA-like
tRNA-Gln nested	ech-7		Directed	inhibitory	miRNA-like
tRNA-Gln nested	ech-5		Directed	inhibitory	miRNA-like
tRNA-Gln nested	dif-1		Directed	inhibitory	miRNA-like
tRNA-Gln nested	dhs-18		Directed	inhibitory	miRNA-like
tRNA-Gln nested	dhs-14		Directed	inhibitory	miRNA-like
tRNA-Gln nested	dhs-6		Directed	inhibitory	miRNA-like
tRNA-Gln nested	csq-1		Directed	inhibitory	miRNA-like
tRNA-Gln nested	cpr-5		Directed	inhibitory	miRNA-like
tRNA-Gln nested	cpr-4		Directed	inhibitory	miRNA-like
tRNA-Gln nested	cpr-1		Directed	inhibitory	miRNA-like
tRNA-Gln nested	cpn-4		Directed	inhibitory	miRNA-like
tRNA-Gln nested	cng-1		Directed	inhibitory	miRNA-like
tRNA-Gln nested	cct-4		Directed	inhibitory	miRNA-like
tRNA-Gln nested	cyp-14A5		Directed	inhibitory	miRNA-like
tRNA-Gln nested	atp-2		Directed	inhibitory	miRNA-like
tRNA-Gln nested	atgp-1		Directed	inhibitory	miRNA-like
tRNA-Gln nested	asm-2		Directed	inhibitory	miRNA-like
tRNA-Gln nested	aps-1		Directed	inhibitory	miRNA-like
tRNA-Gln nested	alh-1		Directed	inhibitory	miRNA-like
tRNA-Gln nested	akt-1		Directed	inhibitory	miRNA-like
tRNA-Ala nested	F12E12.11		Directed	inhibitory	miRNA-like
tRNA-Ala nested	C01B10.11		Directed	inhibitory	miRNA-like
tRNA-Ala nested	K02E11.10		Directed	inhibitory	miRNA-like
tRNA-Ala nested	F43C1.7		Directed	inhibitory	miRNA-like
tRNA-Ala nested	rpl-41.2		Directed	inhibitory	miRNA-like
tRNA-Ala nested	ZK697.14		Directed	inhibitory	miRNA-like
tRNA-Ala nested	tomm-7		Directed	inhibitory	miRNA-like
tRNA-Ala nested	mtx-2		Directed	inhibitory	miRNA-like
tRNA-Ala nested	Y82E9BR.18		Directed	inhibitory	miRNA-like
tRNA-Ala nested	clec-210		Directed	inhibitory	miRNA-like
tRNA-Ala nested	Y73C8B.1		Directed	inhibitory	miRNA-like
tRNA-Ala nested	Y58A7A.5		Directed	inhibitory	miRNA-like
tRNA-Ala nested	Y54F10AM.5		Directed	inhibitory	miRNA-like
tRNA-Ala nested	Y54E10A.17		Directed	inhibitory	miRNA-like
tRNA-Ala nested	Y53G8B.2		Directed	inhibitory	miRNA-like
tRNA-Ala nested	Y50D4B.2		Directed	inhibitory	miRNA-like
tRNA-Ala nested	ugt-29		Directed	inhibitory	miRNA-like
tRNA-Ala nested	nsun-2		Directed	inhibitory	miRNA-like
tRNA-Ala nested	nhr-237		Directed	inhibitory	miRNA-like
tRNA-Ala nested	Y22D7AL.10		Directed	inhibitory	miRNA-like
tRNA-Ala nested	tomm-22		Directed	inhibitory	miRNA-like
tRNA-Ala nested	W03G1.5		Directed	inhibitory	miRNA-like
tRNA-Ala nested	W02F12.2		Directed	inhibitory	miRNA-like
tRNA-Ala nested	pfd-5		Directed	inhibitory	miRNA-like
tRNA-Ala nested	cyp-33C8		Directed	inhibitory	miRNA-like
tRNA-Ala nested	hrg-1		Directed	inhibitory	miRNA-like
tRNA-Ala nested	M60.7		Directed	inhibitory	miRNA-like
tRNA-Ala nested	M04F3.4		Directed	inhibitory	miRNA-like
tRNA-Ala nested	cest-34		Directed	inhibitory	miRNA-like
tRNA-Ala nested	K09F6.10		Directed	inhibitory	miRNA-like
tRNA-Ala nested	K08D9.4		Directed	inhibitory	miRNA-like
tRNA-Ala nested	acdh-3		Directed	inhibitory	miRNA-like
tRNA-Ala nested	ahcy-1		Directed	inhibitory	miRNA-like
tRNA-Ala nested	ubxn-6		Directed	inhibitory	miRNA-like
tRNA-Ala nested	F59B1.8		Directed	inhibitory	miRNA-like
tRNA-Ala nested	acox-3		Directed	inhibitory	miRNA-like
tRNA-Ala nested	ipgm-1		Directed	inhibitory	miRNA-like
tRNA-Ala nested	cest-27		Directed	inhibitory	miRNA-like
tRNA-Ala nested	pmt-2		Directed	inhibitory	miRNA-like
tRNA-Ala nested	cutl-20		Directed	inhibitory	miRNA-like
tRNA-Ala nested	F53C3.6		Directed	inhibitory	miRNA-like
tRNA-Ala nested	F52E4.5		Directed	inhibitory	miRNA-like
tRNA-Ala nested	nhr-142		Directed	inhibitory	miRNA-like
tRNA-Ala nested	cyp-33C4		Directed	inhibitory	miRNA-like
tRNA-Ala nested	F41G3.10		Directed	inhibitory	miRNA-like
tRNA-Ala nested	ctsa-1.1		Directed	inhibitory	miRNA-like
tRNA-Ala nested	cyp-33C3		Directed	inhibitory	miRNA-like
tRNA-Ala nested	F28C10.3		Directed	inhibitory	miRNA-like
tRNA-Ala nested	asp-13		Directed	inhibitory	miRNA-like
tRNA-Ala nested	acdh-9		Directed	inhibitory	miRNA-like
tRNA-Ala nested	ilys-5		Directed	inhibitory	miRNA-like
tRNA-Ala nested	slc-17.5		Directed	inhibitory	miRNA-like
tRNA-Ala nested	F18E3.11		Directed	inhibitory	miRNA-like
tRNA-Ala nested	nhr-178		Directed	inhibitory	miRNA-like
tRNA-Ala nested	F15E6.6		Directed	inhibitory	miRNA-like
tRNA-Ala nested	F14F9.4		Directed	inhibitory	miRNA-like
tRNA-Ala nested	F13C5.1		Directed	inhibitory	miRNA-like
tRNA-Ala nested	farl-11		Directed	inhibitory	miRNA-like
tRNA-Ala nested	nspb-12		Directed	inhibitory	miRNA-like
tRNA-Ala nested	F09E5.3		Directed	inhibitory	miRNA-like
tRNA-Ala nested	F07F6.8		Directed	inhibitory	miRNA-like
tRNA-Ala nested	DC2.5		Directed	inhibitory	miRNA-like
tRNA-Ala nested	nap-1		Directed	inhibitory	miRNA-like
tRNA-Ala nested	D2063.1		Directed	inhibitory	miRNA-like
tRNA-Ala nested	zhit-1		Directed	inhibitory	miRNA-like
tRNA-Ala nested	mboa-3		Directed	inhibitory	miRNA-like
tRNA-Ala nested	C49G7.3		Directed	inhibitory	miRNA-like
tRNA-Ala nested	ugt-24		Directed	inhibitory	miRNA-like
tRNA-Ala nested	acer-1		Directed	inhibitory	miRNA-like
tRNA-Ala nested	abhd-5.2		Directed	inhibitory	miRNA-like
tRNA-Ala nested	C35B1.2		Directed	inhibitory	miRNA-like
tRNA-Ala nested	C29F5.1		Directed	inhibitory	miRNA-like
tRNA-Ala nested	C23H5.8		Directed	inhibitory	miRNA-like
tRNA-Ala nested	C17C3.1		Directed	inhibitory	miRNA-like
tRNA-Ala nested	C15B12.8		Directed	inhibitory	miRNA-like
tRNA-Ala nested	cyp-33A1		Directed	inhibitory	miRNA-like
tRNA-Ala nested	ugt-28		Directed	inhibitory	miRNA-like
tRNA-Ala nested	irg-1		Directed	inhibitory	miRNA-like
tRNA-Ala nested	bath-44		Directed	inhibitory	miRNA-like
tRNA-Ala nested	sams-3		Directed	inhibitory	miRNA-like
tRNA-Ala nested	mthf-1		Directed	inhibitory	miRNA-like
tRNA-Ala nested	best-3		Directed	inhibitory	miRNA-like
tRNA-Ala nested	algn-11		Directed	inhibitory	miRNA-like
tRNA-Ala nested	nfs-1		Directed	inhibitory	miRNA-like
tRNA-Ala nested	K08E5.1		Directed	inhibitory	miRNA-like
tRNA-Ala nested	cyp-13A10		Directed	inhibitory	miRNA-like
tRNA-Ala nested	ZK896.5		Directed	inhibitory	miRNA-like
tRNA-Ala nested	ZK822.5		Directed	inhibitory	miRNA-like
tRNA-Ala nested	riok-3		Directed	inhibitory	miRNA-like
tRNA-Ala nested	lips-6		Directed	inhibitory	miRNA-like
tRNA-Ala nested	atfs-1		Directed	inhibitory	miRNA-like
tRNA-Ala nested	Y73F4A.2		Directed	inhibitory	miRNA-like
tRNA-Ala nested	abhd-3.1		Directed	inhibitory	miRNA-like
tRNA-Ala nested	mrps-7		Directed	inhibitory	miRNA-like
tRNA-Ala nested	daf-22		Directed	inhibitory	miRNA-like
tRNA-Ala nested	ttr-24		Directed	inhibitory	miRNA-like
tRNA-Ala nested	Y46G5A.18		Directed	inhibitory	miRNA-like
tRNA-Ala nested	hphd-1		Directed	inhibitory	miRNA-like
tRNA-Ala nested	mecr-1		Directed	inhibitory	miRNA-like
tRNA-Ala nested	R107.5		Directed	inhibitory	miRNA-like
tRNA-Ala nested	R53.4		Directed	inhibitory	miRNA-like
tRNA-Ala nested	pck-2		Directed	inhibitory	miRNA-like
tRNA-Ala nested	prdx-3		Directed	inhibitory	miRNA-like
tRNA-Ala nested	R07E3.1		Directed	inhibitory	miRNA-like
tRNA-Ala nested	R04B5.6		Directed	inhibitory	miRNA-like
tRNA-Ala nested	metr-1		Directed	inhibitory	miRNA-like
tRNA-Ala nested	ugt-62		Directed	inhibitory	miRNA-like
tRNA-Ala nested	taap-1		Directed	inhibitory	miRNA-like
tRNA-Ala nested	sodh-1		Directed	inhibitory	miRNA-like
tRNA-Ala nested	nipi-3		Directed	inhibitory	miRNA-like
tRNA-Ala nested	nol-56		Directed	inhibitory	miRNA-like
tRNA-Ala nested	endu-1		Directed	inhibitory	miRNA-like
tRNA-Ala nested	K01D12.10		Directed	inhibitory	miRNA-like
tRNA-Ala nested	cri-3		Directed	inhibitory	miRNA-like
tRNA-Ala nested	F54D5.12		Directed	inhibitory	miRNA-like
tRNA-Ala nested	F53F4.10		Directed	inhibitory	miRNA-like
tRNA-Ala nested	acaa-2		Directed	inhibitory	miRNA-like
tRNA-Ala nested	drd-1		Directed	inhibitory	miRNA-like
tRNA-Ala nested	argk-1		Directed	inhibitory	miRNA-like
tRNA-Ala nested	F44A6.5		Directed	inhibitory	miRNA-like
tRNA-Ala nested	F32D8.12		Directed	inhibitory	miRNA-like
tRNA-Ala nested	acs-2		Directed	inhibitory	miRNA-like
tRNA-Ala nested	F27D4.1		Directed	inhibitory	miRNA-like
tRNA-Ala nested	F22B5.4		Directed	inhibitory	miRNA-like
tRNA-Ala nested	cyp-13A12		Directed	inhibitory	miRNA-like
tRNA-Ala nested	vwa-8		Directed	inhibitory	miRNA-like
tRNA-Ala nested	ttr-21		Directed	inhibitory	miRNA-like
tRNA-Ala nested	F09B12.3		Directed	inhibitory	miRNA-like
tRNA-Ala nested	clec-57		Directed	inhibitory	miRNA-like
tRNA-Ala nested	acox-1.3		Directed	inhibitory	miRNA-like
tRNA-Ala nested	mrpl-44		Directed	inhibitory	miRNA-like
tRNA-Ala nested	oac-13		Directed	inhibitory	miRNA-like
tRNA-Ala nested	DH11.2		Directed	inhibitory	miRNA-like
tRNA-Ala nested	nspc-20		Directed	inhibitory	miRNA-like
tRNA-Ala nested	sdz-8		Directed	inhibitory	miRNA-like
tRNA-Ala nested	cdr-2		Directed	inhibitory	miRNA-like
tRNA-Ala nested	C52G5.2		Directed	inhibitory	miRNA-like
tRNA-Ala nested	pyp-1		Directed	inhibitory	miRNA-like
tRNA-Ala nested	best-8		Directed	inhibitory	miRNA-like
tRNA-Ala nested	acs-19		Directed	inhibitory	miRNA-like
tRNA-Ala nested	C34C12.8		Directed	inhibitory	miRNA-like
tRNA-Ala nested	C33A12.3		Directed	inhibitory	miRNA-like
tRNA-Ala nested	cytb-5.1		Directed	inhibitory	miRNA-like
tRNA-Ala nested	dlat-2		Directed	inhibitory	miRNA-like
tRNA-Ala nested	C29F7.2		Directed	inhibitory	miRNA-like
tRNA-Ala nested	C27A7.5		Directed	inhibitory	miRNA-like
tRNA-Ala nested	hrg-7		Directed	inhibitory	miRNA-like
tRNA-Ala nested	ril-2		Directed	inhibitory	miRNA-like
tRNA-Ala nested	C14B1.3		Directed	inhibitory	miRNA-like
tRNA-Ala nested	mrps-22		Directed	inhibitory	miRNA-like
tRNA-Ala nested	atp-5		Directed	inhibitory	miRNA-like
tRNA-Ala nested	pho-11		Directed	inhibitory	miRNA-like
tRNA-Ala nested	C01A2.4		Directed	inhibitory	miRNA-like
tRNA-Ala nested	exos-4.1		Directed	inhibitory	miRNA-like
tRNA-Ala nested	B0457.6		Directed	inhibitory	miRNA-like
tRNA-Ala nested	oac-1		Directed	inhibitory	miRNA-like
tRNA-Ala nested	lcmt-1		Directed	inhibitory	miRNA-like
tRNA-Ala nested	B0272.3		Directed	inhibitory	miRNA-like
tRNA-Ala nested	nfx-1		Directed	inhibitory	miRNA-like
tRNA-Ala nested	plin-1		Directed	inhibitory	miRNA-like
tRNA-Ala nested	vem-1		Directed	inhibitory	miRNA-like
tRNA-Ala nested	mtrr-1		Directed	inhibitory	miRNA-like
tRNA-Ala nested	tag-124		Directed	inhibitory	miRNA-like
tRNA-Ala nested	tag-10		Directed	inhibitory	miRNA-like
tRNA-Ala nested	srr-4		Directed	inhibitory	miRNA-like
tRNA-Ala nested	spr-2		Directed	inhibitory	miRNA-like
tRNA-Ala nested	spp-17		Directed	inhibitory	miRNA-like
tRNA-Ala nested	spp-10		Directed	inhibitory	miRNA-like
tRNA-Ala nested	snr-7		Directed	inhibitory	miRNA-like
tRNA-Ala nested	rps-27		Directed	inhibitory	miRNA-like
tRNA-Ala nested	rpl-22		Directed	inhibitory	miRNA-like
tRNA-Ala nested	rop-1		Directed	inhibitory	miRNA-like
tRNA-Ala nested	pyc-1		Directed	inhibitory	miRNA-like
tRNA-Ala nested	phb-1		Directed	inhibitory	miRNA-like
tRNA-Ala nested	pgp-14		Directed	inhibitory	miRNA-like
tRNA-Ala nested	pgp-9		Directed	inhibitory	miRNA-like
tRNA-Ala nested	pgp-5		Directed	inhibitory	miRNA-like
tRNA-Ala nested	pgp-4		Directed	inhibitory	miRNA-like
tRNA-Ala nested	pgp-1		Directed	inhibitory	miRNA-like
tRNA-Ala nested	pat-10		Directed	inhibitory	miRNA-like
tRNA-Ala nested	par-5		Directed	inhibitory	miRNA-like
tRNA-Ala nested	paf-2		Directed	inhibitory	miRNA-like
tRNA-Ala nested	odc-1		Directed	inhibitory	miRNA-like
tRNA-Ala nested	nxf-1		Directed	inhibitory	miRNA-like
tRNA-Ala nested	nhr-135		Directed	inhibitory	miRNA-like
tRNA-Ala nested	nhr-105		Directed	inhibitory	miRNA-like
tRNA-Ala nested	nhr-68		Directed	inhibitory	miRNA-like
tRNA-Ala nested	nex-1		Directed	inhibitory	miRNA-like
tRNA-Ala nested	mrp-2		Directed	inhibitory	miRNA-like
tRNA-Ala nested	mel-32		Directed	inhibitory	miRNA-like
tRNA-Ala nested	lys-4		Directed	inhibitory	miRNA-like
tRNA-Ala nested	lbp-6		Directed	inhibitory	miRNA-like
tRNA-Ala nested	lbp-3		Directed	inhibitory	miRNA-like
tRNA-Ala nested	iars-2		Directed	inhibitory	miRNA-like
tRNA-Ala nested	ins-35		Directed	inhibitory	miRNA-like
tRNA-Ala nested	inf-1		Directed	inhibitory	miRNA-like
tRNA-Ala nested	ifc-1		Directed	inhibitory	miRNA-like
tRNA-Ala nested	hsp-70		Directed	inhibitory	miRNA-like
tRNA-Ala nested	hsp-16.41		Directed	inhibitory	miRNA-like
tRNA-Ala nested	hsp-12.3		Directed	inhibitory	miRNA-like
tRNA-Ala nested	hoe-1		Directed	inhibitory	miRNA-like
tRNA-Ala nested	haf-7		Directed	inhibitory	miRNA-like
tRNA-Ala nested	haf-2		Directed	inhibitory	miRNA-like
tRNA-Ala nested	gst-39		Directed	inhibitory	miRNA-like
tRNA-Ala nested	gst-33		Directed	inhibitory	miRNA-like
tRNA-Ala nested	gst-7		Directed	inhibitory	miRNA-like
tRNA-Ala nested	icl-1		Directed	inhibitory	miRNA-like
tRNA-Ala nested	fat-3		Directed	inhibitory	miRNA-like
tRNA-Ala nested	emb-8		Directed	inhibitory	miRNA-like
tRNA-Ala nested	ech-7		Directed	inhibitory	miRNA-like
tRNA-Ala nested	ech-5		Directed	inhibitory	miRNA-like
tRNA-Ala nested	dif-1		Directed	inhibitory	miRNA-like
tRNA-Ala nested	dhs-18		Directed	inhibitory	miRNA-like
tRNA-Ala nested	dhs-14		Directed	inhibitory	miRNA-like
tRNA-Ala nested	dhs-6		Directed	inhibitory	miRNA-like
tRNA-Ala nested	csq-1		Directed	inhibitory	miRNA-like
tRNA-Ala nested	cpr-5		Directed	inhibitory	miRNA-like
tRNA-Ala nested	cpr-4		Directed	inhibitory	miRNA-like
tRNA-Ala nested	cpr-1		Directed	inhibitory	miRNA-like
tRNA-Ala nested	cpn-4		Directed	inhibitory	miRNA-like
tRNA-Ala nested	cng-1		Directed	inhibitory	miRNA-like
tRNA-Ala nested	cct-4		Directed	inhibitory	miRNA-like
tRNA-Ala nested	cyp-14A5		Directed	inhibitory	miRNA-like
tRNA-Ala nested	atp-2		Directed	inhibitory	miRNA-like
tRNA-Ala nested	atgp-1		Directed	inhibitory	miRNA-like
tRNA-Ala nested	asm-2		Directed	inhibitory	miRNA-like
tRNA-Ala nested	asg-1		Directed	inhibitory	miRNA-like
tRNA-Ala nested	alh-1		Directed	inhibitory	miRNA-like
tRNA-Ala nested	F12E12.11		Directed	inhibitory	miRNA-like
tRNA-Ala nested	C01B10.11		Directed	inhibitory	miRNA-like
tRNA-Ala nested	K02E11.10		Directed	inhibitory	miRNA-like
tRNA-Ala nested	F43C1.7		Directed	inhibitory	miRNA-like
tRNA-Ala nested	rpl-41.2		Directed	inhibitory	miRNA-like
tRNA-Ala nested	ZK697.14		Directed	inhibitory	miRNA-like
tRNA-Ala nested	tomm-7		Directed	inhibitory	miRNA-like
tRNA-Ala nested	mtx-2		Directed	inhibitory	miRNA-like
tRNA-Ala nested	Y82E9BR.18		Directed	inhibitory	miRNA-like
tRNA-Ala nested	clec-210		Directed	inhibitory	miRNA-like
tRNA-Ala nested	Y73C8B.1		Directed	inhibitory	miRNA-like
tRNA-Ala nested	Y58A7A.5		Directed	inhibitory	miRNA-like
tRNA-Ala nested	Y54F10AM.5		Directed	inhibitory	miRNA-like
tRNA-Ala nested	Y54E10A.17		Directed	inhibitory	miRNA-like
tRNA-Ala nested	Y53G8B.2		Directed	inhibitory	miRNA-like
tRNA-Ala nested	Y50D4B.2		Directed	inhibitory	miRNA-like
tRNA-Ala nested	ugt-29		Directed	inhibitory	miRNA-like
tRNA-Ala nested	nsun-2		Directed	inhibitory	miRNA-like
tRNA-Ala nested	nhr-237		Directed	inhibitory	miRNA-like
tRNA-Ala nested	Y22D7AL.10		Directed	inhibitory	miRNA-like
tRNA-Ala nested	tomm-22		Directed	inhibitory	miRNA-like
tRNA-Ala nested	W03G1.5		Directed	inhibitory	miRNA-like
tRNA-Ala nested	W02F12.2		Directed	inhibitory	miRNA-like
tRNA-Ala nested	pfd-5		Directed	inhibitory	miRNA-like
tRNA-Ala nested	cyp-33C8		Directed	inhibitory	miRNA-like
tRNA-Ala nested	hrg-1		Directed	inhibitory	miRNA-like
tRNA-Ala nested	M60.7		Directed	inhibitory	miRNA-like
tRNA-Ala nested	M04F3.4		Directed	inhibitory	miRNA-like
tRNA-Ala nested	cest-34		Directed	inhibitory	miRNA-like
tRNA-Ala nested	K09F6.10		Directed	inhibitory	miRNA-like
tRNA-Ala nested	K08D9.4		Directed	inhibitory	miRNA-like
tRNA-Ala nested	acdh-3		Directed	inhibitory	miRNA-like
tRNA-Ala nested	ahcy-1		Directed	inhibitory	miRNA-like
tRNA-Ala nested	ubxn-6		Directed	inhibitory	miRNA-like
tRNA-Ala nested	F59B1.8		Directed	inhibitory	miRNA-like
tRNA-Ala nested	acox-3		Directed	inhibitory	miRNA-like
tRNA-Ala nested	ipgm-1		Directed	inhibitory	miRNA-like
tRNA-Ala nested	cest-27		Directed	inhibitory	miRNA-like
tRNA-Ala nested	pmt-2		Directed	inhibitory	miRNA-like
tRNA-Ala nested	cutl-20		Directed	inhibitory	miRNA-like
tRNA-Ala nested	F53C3.6		Directed	inhibitory	miRNA-like
tRNA-Ala nested	F52E4.5		Directed	inhibitory	miRNA-like
tRNA-Ala nested	nhr-142		Directed	inhibitory	miRNA-like
tRNA-Ala nested	cyp-33C4		Directed	inhibitory	miRNA-like
tRNA-Ala nested	F41G3.10		Directed	inhibitory	miRNA-like
tRNA-Ala nested	ctsa-1.1		Directed	inhibitory	miRNA-like
tRNA-Ala nested	cyp-33C3		Directed	inhibitory	miRNA-like
tRNA-Ala nested	F28C10.3		Directed	inhibitory	miRNA-like
tRNA-Ala nested	asp-13		Directed	inhibitory	miRNA-like
tRNA-Ala nested	acdh-9		Directed	inhibitory	miRNA-like
tRNA-Ala nested	ilys-5		Directed	inhibitory	miRNA-like
tRNA-Ala nested	slc-17.5		Directed	inhibitory	miRNA-like
tRNA-Ala nested	F18E3.11		Directed	inhibitory	miRNA-like
tRNA-Ala nested	nhr-178		Directed	inhibitory	miRNA-like
tRNA-Ala nested	F15E6.6		Directed	inhibitory	miRNA-like
tRNA-Ala nested	F14F9.4		Directed	inhibitory	miRNA-like
tRNA-Ala nested	F13C5.1		Directed	inhibitory	miRNA-like
tRNA-Ala nested	farl-11		Directed	inhibitory	miRNA-like
tRNA-Ala nested	nspb-12		Directed	inhibitory	miRNA-like
tRNA-Ala nested	F09E5.3		Directed	inhibitory	miRNA-like
tRNA-Ala nested	F07F6.8		Directed	inhibitory	miRNA-like
tRNA-Ala nested	DC2.5		Directed	inhibitory	miRNA-like
tRNA-Ala nested	nap-1		Directed	inhibitory	miRNA-like
tRNA-Ala nested	D2063.1		Directed	inhibitory	miRNA-like
tRNA-Ala nested	zhit-1		Directed	inhibitory	miRNA-like
tRNA-Ala nested	mboa-3		Directed	inhibitory	miRNA-like
tRNA-Ala nested	C49G7.3		Directed	inhibitory	miRNA-like
tRNA-Ala nested	ugt-24		Directed	inhibitory	miRNA-like
tRNA-Ala nested	acer-1		Directed	inhibitory	miRNA-like
tRNA-Ala nested	abhd-5.2		Directed	inhibitory	miRNA-like
tRNA-Ala nested	C35B1.2		Directed	inhibitory	miRNA-like
tRNA-Ala nested	C29F5.1		Directed	inhibitory	miRNA-like
tRNA-Ala nested	C23H5.8		Directed	inhibitory	miRNA-like
tRNA-Ala nested	C17C3.1		Directed	inhibitory	miRNA-like
tRNA-Ala nested	C15B12.8		Directed	inhibitory	miRNA-like
tRNA-Ala nested	cyp-33A1		Directed	inhibitory	miRNA-like
tRNA-Ala nested	ugt-28		Directed	inhibitory	miRNA-like
tRNA-Ala nested	irg-1		Directed	inhibitory	miRNA-like
tRNA-Ala nested	bath-44		Directed	inhibitory	miRNA-like
tRNA-Ala nested	sams-3		Directed	inhibitory	miRNA-like
tRNA-Ala nested	mthf-1		Directed	inhibitory	miRNA-like
tRNA-Ala nested	best-3		Directed	inhibitory	miRNA-like
tRNA-Ala nested	algn-11		Directed	inhibitory	miRNA-like
tRNA-Ala nested	nfs-1		Directed	inhibitory	miRNA-like
tRNA-Ala nested	K08E5.1		Directed	inhibitory	miRNA-like
tRNA-Ala nested	cyp-13A10		Directed	inhibitory	miRNA-like
tRNA-Ala nested	ZK896.5		Directed	inhibitory	miRNA-like
tRNA-Ala nested	ZK822.5		Directed	inhibitory	miRNA-like
tRNA-Ala nested	riok-3		Directed	inhibitory	miRNA-like
tRNA-Ala nested	lips-6		Directed	inhibitory	miRNA-like
tRNA-Ala nested	atfs-1		Directed	inhibitory	miRNA-like
tRNA-Ala nested	Y73F4A.2		Directed	inhibitory	miRNA-like
tRNA-Ala nested	abhd-3.1		Directed	inhibitory	miRNA-like
tRNA-Ala nested	mrps-7		Directed	inhibitory	miRNA-like
tRNA-Ala nested	daf-22		Directed	inhibitory	miRNA-like
tRNA-Ala nested	ttr-24		Directed	inhibitory	miRNA-like
tRNA-Ala nested	Y46G5A.18		Directed	inhibitory	miRNA-like
tRNA-Ala nested	hphd-1		Directed	inhibitory	miRNA-like
tRNA-Ala nested	mecr-1		Directed	inhibitory	miRNA-like
tRNA-Ala nested	R107.5		Directed	inhibitory	miRNA-like
tRNA-Ala nested	R53.4		Directed	inhibitory	miRNA-like
tRNA-Ala nested	pck-2		Directed	inhibitory	miRNA-like
tRNA-Ala nested	prdx-3		Directed	inhibitory	miRNA-like
tRNA-Ala nested	R07E3.1		Directed	inhibitory	miRNA-like
tRNA-Ala nested	R04B5.6		Directed	inhibitory	miRNA-like
tRNA-Ala nested	metr-1		Directed	inhibitory	miRNA-like
tRNA-Ala nested	ugt-62		Directed	inhibitory	miRNA-like
tRNA-Ala nested	taap-1		Directed	inhibitory	miRNA-like
tRNA-Ala nested	sodh-1		Directed	inhibitory	miRNA-like
tRNA-Ala nested	nipi-3		Directed	inhibitory	miRNA-like
tRNA-Ala nested	nol-56		Directed	inhibitory	miRNA-like
tRNA-Ala nested	endu-1		Directed	inhibitory	miRNA-like
tRNA-Ala nested	K01D12.10		Directed	inhibitory	miRNA-like
tRNA-Ala nested	cri-3		Directed	inhibitory	miRNA-like
tRNA-Ala nested	F54D5.12		Directed	inhibitory	miRNA-like
tRNA-Ala nested	F53F4.10		Directed	inhibitory	miRNA-like
tRNA-Ala nested	acaa-2		Directed	inhibitory	miRNA-like
tRNA-Ala nested	drd-1		Directed	inhibitory	miRNA-like
tRNA-Ala nested	argk-1		Directed	inhibitory	miRNA-like
tRNA-Ala nested	F44A6.5		Directed	inhibitory	miRNA-like
tRNA-Ala nested	F32D8.12		Directed	inhibitory	miRNA-like
tRNA-Ala nested	acs-2		Directed	inhibitory	miRNA-like
tRNA-Ala nested	F27D4.1		Directed	inhibitory	miRNA-like
tRNA-Ala nested	F22B5.4		Directed	inhibitory	miRNA-like
tRNA-Ala nested	cyp-13A12		Directed	inhibitory	miRNA-like
tRNA-Ala nested	vwa-8		Directed	inhibitory	miRNA-like
tRNA-Ala nested	ttr-21		Directed	inhibitory	miRNA-like
tRNA-Ala nested	F09B12.3		Directed	inhibitory	miRNA-like
tRNA-Ala nested	clec-57		Directed	inhibitory	miRNA-like
tRNA-Ala nested	acox-1.3		Directed	inhibitory	miRNA-like
tRNA-Ala nested	mrpl-44		Directed	inhibitory	miRNA-like
tRNA-Ala nested	oac-13		Directed	inhibitory	miRNA-like
tRNA-Ala nested	DH11.2		Directed	inhibitory	miRNA-like
tRNA-Ala nested	nspc-20		Directed	inhibitory	miRNA-like
tRNA-Ala nested	sdz-8		Directed	inhibitory	miRNA-like
tRNA-Ala nested	cdr-2		Directed	inhibitory	miRNA-like
tRNA-Ala nested	C52G5.2		Directed	inhibitory	miRNA-like
tRNA-Ala nested	pyp-1		Directed	inhibitory	miRNA-like
tRNA-Ala nested	best-8		Directed	inhibitory	miRNA-like
tRNA-Ala nested	acs-19		Directed	inhibitory	miRNA-like
tRNA-Ala nested	C34C12.8		Directed	inhibitory	miRNA-like
tRNA-Ala nested	C33A12.3		Directed	inhibitory	miRNA-like
tRNA-Ala nested	cytb-5.1		Directed	inhibitory	miRNA-like
tRNA-Ala nested	dlat-2		Directed	inhibitory	miRNA-like
tRNA-Ala nested	C29F7.2		Directed	inhibitory	miRNA-like
tRNA-Ala nested	C27A7.5		Directed	inhibitory	miRNA-like
tRNA-Ala nested	hrg-7		Directed	inhibitory	miRNA-like
tRNA-Ala nested	ril-2		Directed	inhibitory	miRNA-like
tRNA-Ala nested	C14B1.3		Directed	inhibitory	miRNA-like
tRNA-Ala nested	mrps-22		Directed	inhibitory	miRNA-like
tRNA-Ala nested	atp-5		Directed	inhibitory	miRNA-like
tRNA-Ala nested	pho-11		Directed	inhibitory	miRNA-like
tRNA-Ala nested	C01A2.4		Directed	inhibitory	miRNA-like
tRNA-Ala nested	exos-4.1		Directed	inhibitory	miRNA-like
tRNA-Ala nested	B0457.6		Directed	inhibitory	miRNA-like
tRNA-Ala nested	oac-1		Directed	inhibitory	miRNA-like
tRNA-Ala nested	lcmt-1		Directed	inhibitory	miRNA-like
tRNA-Ala nested	B0272.3		Directed	inhibitory	miRNA-like
tRNA-Ala nested	nfx-1		Directed	inhibitory	miRNA-like
tRNA-Ala nested	plin-1		Directed	inhibitory	miRNA-like
tRNA-Ala nested	vem-1		Directed	inhibitory	miRNA-like
tRNA-Ala nested	mtrr-1		Directed	inhibitory	miRNA-like
tRNA-Ala nested	tag-124		Directed	inhibitory	miRNA-like
tRNA-Ala nested	tag-10		Directed	inhibitory	miRNA-like
tRNA-Ala nested	srr-4		Directed	inhibitory	miRNA-like
tRNA-Ala nested	spr-2		Directed	inhibitory	miRNA-like
tRNA-Ala nested	spp-17		Directed	inhibitory	miRNA-like
tRNA-Ala nested	spp-10		Directed	inhibitory	miRNA-like
tRNA-Ala nested	snr-7		Directed	inhibitory	miRNA-like
tRNA-Ala nested	rps-27		Directed	inhibitory	miRNA-like
tRNA-Ala nested	rpl-22		Directed	inhibitory	miRNA-like
tRNA-Ala nested	rop-1		Directed	inhibitory	miRNA-like
tRNA-Ala nested	pyc-1		Directed	inhibitory	miRNA-like
tRNA-Ala nested	phb-1		Directed	inhibitory	miRNA-like
tRNA-Ala nested	pgp-14		Directed	inhibitory	miRNA-like
tRNA-Ala nested	pgp-9		Directed	inhibitory	miRNA-like
tRNA-Ala nested	pgp-5		Directed	inhibitory	miRNA-like
tRNA-Ala nested	pgp-4		Directed	inhibitory	miRNA-like
tRNA-Ala nested	pgp-1		Directed	inhibitory	miRNA-like
tRNA-Ala nested	pat-10		Directed	inhibitory	miRNA-like
tRNA-Ala nested	par-5		Directed	inhibitory	miRNA-like
tRNA-Ala nested	paf-2		Directed	inhibitory	miRNA-like
tRNA-Ala nested	odc-1		Directed	inhibitory	miRNA-like
tRNA-Ala nested	nxf-1		Directed	inhibitory	miRNA-like
tRNA-Ala nested	nhr-135		Directed	inhibitory	miRNA-like
tRNA-Ala nested	nhr-105		Directed	inhibitory	miRNA-like
tRNA-Ala nested	nhr-68		Directed	inhibitory	miRNA-like
tRNA-Ala nested	nex-1		Directed	inhibitory	miRNA-like
tRNA-Ala nested	mrp-2		Directed	inhibitory	miRNA-like
tRNA-Ala nested	mel-32		Directed	inhibitory	miRNA-like
tRNA-Ala nested	lys-4		Directed	inhibitory	miRNA-like
tRNA-Ala nested	lbp-6		Directed	inhibitory	miRNA-like
tRNA-Ala nested	lbp-3		Directed	inhibitory	miRNA-like
tRNA-Ala nested	iars-2		Directed	inhibitory	miRNA-like
tRNA-Ala nested	ins-35		Directed	inhibitory	miRNA-like
tRNA-Ala nested	inf-1		Directed	inhibitory	miRNA-like
tRNA-Ala nested	ifc-1		Directed	inhibitory	miRNA-like
tRNA-Ala nested	hsp-70		Directed	inhibitory	miRNA-like
tRNA-Ala nested	hsp-16.41		Directed	inhibitory	miRNA-like
tRNA-Ala nested	hsp-12.3		Directed	inhibitory	miRNA-like
tRNA-Ala nested	hoe-1		Directed	inhibitory	miRNA-like
tRNA-Ala nested	haf-7		Directed	inhibitory	miRNA-like
tRNA-Ala nested	haf-2		Directed	inhibitory	miRNA-like
tRNA-Ala nested	gst-39		Directed	inhibitory	miRNA-like
tRNA-Ala nested	gst-33		Directed	inhibitory	miRNA-like
tRNA-Ala nested	gst-7		Directed	inhibitory	miRNA-like
tRNA-Ala nested	icl-1		Directed	inhibitory	miRNA-like
tRNA-Ala nested	fat-3		Directed	inhibitory	miRNA-like
tRNA-Ala nested	emb-8		Directed	inhibitory	miRNA-like
tRNA-Ala nested	ech-7		Directed	inhibitory	miRNA-like
tRNA-Ala nested	ech-5		Directed	inhibitory	miRNA-like
tRNA-Ala nested	dif-1		Directed	inhibitory	miRNA-like
tRNA-Ala nested	dhs-18		Directed	inhibitory	miRNA-like
tRNA-Ala nested	dhs-14		Directed	inhibitory	miRNA-like
tRNA-Ala nested	dhs-6		Directed	inhibitory	miRNA-like
tRNA-Ala nested	csq-1		Directed	inhibitory	miRNA-like
tRNA-Ala nested	cpr-5		Directed	inhibitory	miRNA-like
tRNA-Ala nested	cpr-4		Directed	inhibitory	miRNA-like
tRNA-Ala nested	cpr-1		Directed	inhibitory	miRNA-like
tRNA-Ala nested	cpn-4		Directed	inhibitory	miRNA-like
tRNA-Ala nested	cng-1		Directed	inhibitory	miRNA-like
tRNA-Ala nested	cct-4		Directed	inhibitory	miRNA-like
tRNA-Ala nested	cyp-14A5		Directed	inhibitory	miRNA-like
tRNA-Ala nested	atp-2		Directed	inhibitory	miRNA-like
tRNA-Ala nested	atgp-1		Directed	inhibitory	miRNA-like
tRNA-Ala nested	asm-2		Directed	inhibitory	miRNA-like
tRNA-Ala nested	asg-1		Directed	inhibitory	miRNA-like
tRNA-Ala nested	alh-1		Directed	inhibitory	miRNA-like
tRNA-Ala antioverlap	F12E12.11		Directed	inhibitory	miRNA-like
tRNA-Ala antioverlap	C01B10.11		Directed	inhibitory	miRNA-like
tRNA-Ala antioverlap	K02E11.10		Directed	inhibitory	miRNA-like
tRNA-Ala antioverlap	ZK697.14		Directed	inhibitory	miRNA-like
tRNA-Ala antioverlap	mtx-2		Directed	inhibitory	miRNA-like
tRNA-Ala antioverlap	Y82E9BR.18		Directed	inhibitory	miRNA-like
tRNA-Ala antioverlap	Y58A7A.3		Directed	inhibitory	miRNA-like
tRNA-Ala antioverlap	Y54F10AM.5		Directed	inhibitory	miRNA-like
tRNA-Ala antioverlap	Y54E10A.17		Directed	inhibitory	miRNA-like
tRNA-Ala antioverlap	Y53G8B.2		Directed	inhibitory	miRNA-like
tRNA-Ala antioverlap	Y50D4B.2		Directed	inhibitory	miRNA-like
tRNA-Ala antioverlap	ugt-29		Directed	inhibitory	miRNA-like
tRNA-Ala antioverlap	nsun-2		Directed	inhibitory	miRNA-like
tRNA-Ala antioverlap	tomm-22		Directed	inhibitory	miRNA-like
tRNA-Ala antioverlap	W03G1.5		Directed	inhibitory	miRNA-like
tRNA-Ala antioverlap	pfd-5		Directed	inhibitory	miRNA-like
tRNA-Ala antioverlap	R08F11.1		Directed	inhibitory	miRNA-like
tRNA-Ala antioverlap	hrg-1		Directed	inhibitory	miRNA-like
tRNA-Ala antioverlap	M60.7		Directed	inhibitory	miRNA-like
tRNA-Ala antioverlap	cest-34		Directed	inhibitory	miRNA-like
tRNA-Ala antioverlap	K09F6.10		Directed	inhibitory	miRNA-like
tRNA-Ala antioverlap	K08D9.4		Directed	inhibitory	miRNA-like
tRNA-Ala antioverlap	acdh-3		Directed	inhibitory	miRNA-like
tRNA-Ala antioverlap	ubxn-6		Directed	inhibitory	miRNA-like
tRNA-Ala antioverlap	F59B1.8		Directed	inhibitory	miRNA-like
tRNA-Ala antioverlap	acox-3		Directed	inhibitory	miRNA-like
tRNA-Ala antioverlap	ipgm-1		Directed	inhibitory	miRNA-like
tRNA-Ala antioverlap	cest-27		Directed	inhibitory	miRNA-like
tRNA-Ala antioverlap	wdr-12		Directed	inhibitory	miRNA-like
tRNA-Ala antioverlap	pmt-2		Directed	inhibitory	miRNA-like
tRNA-Ala antioverlap	cutl-20		Directed	inhibitory	miRNA-like
tRNA-Ala antioverlap	F53C3.6		Directed	inhibitory	miRNA-like
tRNA-Ala antioverlap	F52E4.5		Directed	inhibitory	miRNA-like
tRNA-Ala antioverlap	nhr-142		Directed	inhibitory	miRNA-like
tRNA-Ala antioverlap	cyp-33C4		Directed	inhibitory	miRNA-like
tRNA-Ala antioverlap	insc-1		Directed	inhibitory	miRNA-like
tRNA-Ala antioverlap	ctsa-1.1		Directed	inhibitory	miRNA-like
tRNA-Ala antioverlap	cyp-33C3		Directed	inhibitory	miRNA-like
tRNA-Ala antioverlap	F28C10.3		Directed	inhibitory	miRNA-like
tRNA-Ala antioverlap	asp-13		Directed	inhibitory	miRNA-like
tRNA-Ala antioverlap	acdh-9		Directed	inhibitory	miRNA-like
tRNA-Ala antioverlap	slc-17.5		Directed	inhibitory	miRNA-like
tRNA-Ala antioverlap	ddo-2		Directed	inhibitory	miRNA-like
tRNA-Ala antioverlap	nhr-178		Directed	inhibitory	miRNA-like
tRNA-Ala antioverlap	F15E6.6		Directed	inhibitory	miRNA-like
tRNA-Ala antioverlap	F14F9.4		Directed	inhibitory	miRNA-like
tRNA-Ala antioverlap	F13C5.1		Directed	inhibitory	miRNA-like
tRNA-Ala antioverlap	farl-11		Directed	inhibitory	miRNA-like
tRNA-Ala antioverlap	nspb-12		Directed	inhibitory	miRNA-like
tRNA-Ala antioverlap	F09E5.3		Directed	inhibitory	miRNA-like
tRNA-Ala antioverlap	DC2.5		Directed	inhibitory	miRNA-like
tRNA-Ala antioverlap	nap-1		Directed	inhibitory	miRNA-like
tRNA-Ala antioverlap	D2063.1		Directed	inhibitory	miRNA-like
tRNA-Ala antioverlap	cebp-1		Directed	inhibitory	miRNA-like
tRNA-Ala antioverlap	zhit-1		Directed	inhibitory	miRNA-like
tRNA-Ala antioverlap	acdh-1		Directed	inhibitory	miRNA-like
tRNA-Ala antioverlap	C49G7.3		Directed	inhibitory	miRNA-like
tRNA-Ala antioverlap	ugt-24		Directed	inhibitory	miRNA-like
tRNA-Ala antioverlap	acer-1		Directed	inhibitory	miRNA-like
tRNA-Ala antioverlap	abhd-5.1		Directed	inhibitory	miRNA-like
tRNA-Ala antioverlap	C29F5.1		Directed	inhibitory	miRNA-like
tRNA-Ala antioverlap	C17C3.1		Directed	inhibitory	miRNA-like
tRNA-Ala antioverlap	C15B12.8		Directed	inhibitory	miRNA-like
tRNA-Ala antioverlap	cyp-33A1		Directed	inhibitory	miRNA-like
tRNA-Ala antioverlap	ugt-28		Directed	inhibitory	miRNA-like
tRNA-Ala antioverlap	irg-1		Directed	inhibitory	miRNA-like
tRNA-Ala antioverlap	bath-44		Directed	inhibitory	miRNA-like
tRNA-Ala antioverlap	sams-3		Directed	inhibitory	miRNA-like
tRNA-Ala antioverlap	mthf-1		Directed	inhibitory	miRNA-like
tRNA-Ala antioverlap	best-3		Directed	inhibitory	miRNA-like
tRNA-Ala antioverlap	algn-11		Directed	inhibitory	miRNA-like
tRNA-Ala antioverlap	nfs-1		Directed	inhibitory	miRNA-like
tRNA-Ala antioverlap	K08E5.1		Directed	inhibitory	miRNA-like
tRNA-Ala antioverlap	cyp-13A10		Directed	inhibitory	miRNA-like
tRNA-Ala antioverlap	ZK896.5		Directed	inhibitory	miRNA-like
tRNA-Ala antioverlap	ZK822.5		Directed	inhibitory	miRNA-like
tRNA-Ala antioverlap	riok-3		Directed	inhibitory	miRNA-like
tRNA-Ala antioverlap	lips-6		Directed	inhibitory	miRNA-like
tRNA-Ala antioverlap	atfs-1		Directed	inhibitory	miRNA-like
tRNA-Ala antioverlap	Y73F4A.2		Directed	inhibitory	miRNA-like
tRNA-Ala antioverlap	abhd-3.1		Directed	inhibitory	miRNA-like
tRNA-Ala antioverlap	mrps-7		Directed	inhibitory	miRNA-like
tRNA-Ala antioverlap	daf-22		Directed	inhibitory	miRNA-like
tRNA-Ala antioverlap	ttr-24		Directed	inhibitory	miRNA-like
tRNA-Ala antioverlap	Y46G5A.18		Directed	inhibitory	miRNA-like
tRNA-Ala antioverlap	hphd-1		Directed	inhibitory	miRNA-like
tRNA-Ala antioverlap	mecr-1		Directed	inhibitory	miRNA-like
tRNA-Ala antioverlap	R107.5		Directed	inhibitory	miRNA-like
tRNA-Ala antioverlap	R53.4		Directed	inhibitory	miRNA-like
tRNA-Ala antioverlap	pck-2		Directed	inhibitory	miRNA-like
tRNA-Ala antioverlap	mpc-1		Directed	inhibitory	miRNA-like
tRNA-Ala antioverlap	R07E3.1		Directed	inhibitory	miRNA-like
tRNA-Ala antioverlap	metr-1		Directed	inhibitory	miRNA-like
tRNA-Ala antioverlap	ugt-62		Directed	inhibitory	miRNA-like
tRNA-Ala antioverlap	taap-1		Directed	inhibitory	miRNA-like
tRNA-Ala antioverlap	sodh-1		Directed	inhibitory	miRNA-like
tRNA-Ala antioverlap	nipi-3		Directed	inhibitory	miRNA-like
tRNA-Ala antioverlap	nol-56		Directed	inhibitory	miRNA-like
tRNA-Ala antioverlap	endu-1		Directed	inhibitory	miRNA-like
tRNA-Ala antioverlap	K01D12.10		Directed	inhibitory	miRNA-like
tRNA-Ala antioverlap	cri-3		Directed	inhibitory	miRNA-like
tRNA-Ala antioverlap	gtf-2E2		Directed	inhibitory	miRNA-like
tRNA-Ala antioverlap	F53F4.10		Directed	inhibitory	miRNA-like
tRNA-Ala antioverlap	acaa-2		Directed	inhibitory	miRNA-like
tRNA-Ala antioverlap	argk-1		Directed	inhibitory	miRNA-like
tRNA-Ala antioverlap	F44A6.5		Directed	inhibitory	miRNA-like
tRNA-Ala antioverlap	F32D8.12		Directed	inhibitory	miRNA-like
tRNA-Ala antioverlap	F31D4.9		Directed	inhibitory	miRNA-like
tRNA-Ala antioverlap	acs-2		Directed	inhibitory	miRNA-like
tRNA-Ala antioverlap	F27D4.1		Directed	inhibitory	miRNA-like
tRNA-Ala antioverlap	cyp-13A12		Directed	inhibitory	miRNA-like
tRNA-Ala antioverlap	vwa-8		Directed	inhibitory	miRNA-like
tRNA-Ala antioverlap	cpt-5		Directed	inhibitory	miRNA-like
tRNA-Ala antioverlap	F09B12.3		Directed	inhibitory	miRNA-like
tRNA-Ala antioverlap	clec-57		Directed	inhibitory	miRNA-like
tRNA-Ala antioverlap	acox-1.3		Directed	inhibitory	miRNA-like
tRNA-Ala antioverlap	mrpl-44		Directed	inhibitory	miRNA-like
tRNA-Ala antioverlap	oac-13		Directed	inhibitory	miRNA-like
tRNA-Ala antioverlap	DH11.2		Directed	inhibitory	miRNA-like
tRNA-Ala antioverlap	sdz-8		Directed	inhibitory	miRNA-like
tRNA-Ala antioverlap	cdr-2		Directed	inhibitory	miRNA-like
tRNA-Ala antioverlap	pyp-1		Directed	inhibitory	miRNA-like
tRNA-Ala antioverlap	best-8		Directed	inhibitory	miRNA-like
tRNA-Ala antioverlap	acs-19		Directed	inhibitory	miRNA-like
tRNA-Ala antioverlap	C34C12.8		Directed	inhibitory	miRNA-like
tRNA-Ala antioverlap	C33A12.3		Directed	inhibitory	miRNA-like
tRNA-Ala antioverlap	cytb-5.1		Directed	inhibitory	miRNA-like
tRNA-Ala antioverlap	dlat-2		Directed	inhibitory	miRNA-like
tRNA-Ala antioverlap	C29F7.2		Directed	inhibitory	miRNA-like
tRNA-Ala antioverlap	rmd-2		Directed	inhibitory	miRNA-like
tRNA-Ala antioverlap	C27A7.5		Directed	inhibitory	miRNA-like
tRNA-Ala antioverlap	hrg-7		Directed	inhibitory	miRNA-like
tRNA-Ala antioverlap	ril-2		Directed	inhibitory	miRNA-like
tRNA-Ala antioverlap	C14B1.3		Directed	inhibitory	miRNA-like
tRNA-Ala antioverlap	mrps-22		Directed	inhibitory	miRNA-like
tRNA-Ala antioverlap	C08F8.2		Directed	inhibitory	miRNA-like
tRNA-Ala antioverlap	atp-5		Directed	inhibitory	miRNA-like
tRNA-Ala antioverlap	C05C10.3		Directed	inhibitory	miRNA-like
tRNA-Ala antioverlap	C01A2.4		Directed	inhibitory	miRNA-like
tRNA-Ala antioverlap	exos-4.1		Directed	inhibitory	miRNA-like
tRNA-Ala antioverlap	B0457.6		Directed	inhibitory	miRNA-like
tRNA-Ala antioverlap	oac-1		Directed	inhibitory	miRNA-like
tRNA-Ala antioverlap	lcmt-1		Directed	inhibitory	miRNA-like
tRNA-Ala antioverlap	B0272.3		Directed	inhibitory	miRNA-like
tRNA-Ala antioverlap	nfx-1		Directed	inhibitory	miRNA-like
tRNA-Ala antioverlap	plin-1		Directed	inhibitory	miRNA-like
tRNA-Ala antioverlap	vem-1		Directed	inhibitory	miRNA-like
tRNA-Ala antioverlap	ubc-1		Directed	inhibitory	miRNA-like
tRNA-Ala antioverlap	mtrr-1		Directed	inhibitory	miRNA-like
tRNA-Ala antioverlap	tag-124		Directed	inhibitory	miRNA-like
tRNA-Ala antioverlap	tag-10		Directed	inhibitory	miRNA-like
tRNA-Ala antioverlap	srr-4		Directed	inhibitory	miRNA-like
tRNA-Ala antioverlap	spr-2		Directed	inhibitory	miRNA-like
tRNA-Ala antioverlap	spp-17		Directed	inhibitory	miRNA-like
tRNA-Ala antioverlap	spp-10		Directed	inhibitory	miRNA-like
tRNA-Ala antioverlap	snr-7		Directed	inhibitory	miRNA-like
tRNA-Ala antioverlap	rps-27		Directed	inhibitory	miRNA-like
tRNA-Ala antioverlap	rpl-22		Directed	inhibitory	miRNA-like
tRNA-Ala antioverlap	rop-1		Directed	inhibitory	miRNA-like
tRNA-Ala antioverlap	pyc-1		Directed	inhibitory	miRNA-like
tRNA-Ala antioverlap	phb-1		Directed	inhibitory	miRNA-like
tRNA-Ala antioverlap	pgp-14		Directed	inhibitory	miRNA-like
tRNA-Ala antioverlap	pgp-9		Directed	inhibitory	miRNA-like
tRNA-Ala antioverlap	pgp-5		Directed	inhibitory	miRNA-like
tRNA-Ala antioverlap	pgp-4		Directed	inhibitory	miRNA-like
tRNA-Ala antioverlap	pgp-1		Directed	inhibitory	miRNA-like
tRNA-Ala antioverlap	pat-10		Directed	inhibitory	miRNA-like
tRNA-Ala antioverlap	par-5		Directed	inhibitory	miRNA-like
tRNA-Ala antioverlap	paf-2		Directed	inhibitory	miRNA-like
tRNA-Ala antioverlap	odc-1		Directed	inhibitory	miRNA-like
tRNA-Ala antioverlap	nxf-1		Directed	inhibitory	miRNA-like
tRNA-Ala antioverlap	nhr-135		Directed	inhibitory	miRNA-like
tRNA-Ala antioverlap	nhr-68		Directed	inhibitory	miRNA-like
tRNA-Ala antioverlap	nex-1		Directed	inhibitory	miRNA-like
tRNA-Ala antioverlap	mrp-2		Directed	inhibitory	miRNA-like
tRNA-Ala antioverlap	mel-32		Directed	inhibitory	miRNA-like
tRNA-Ala antioverlap	lys-7		Directed	inhibitory	miRNA-like
tRNA-Ala antioverlap	lys-4		Directed	inhibitory	miRNA-like
tRNA-Ala antioverlap	lbp-6		Directed	inhibitory	miRNA-like
tRNA-Ala antioverlap	lbp-2		Directed	inhibitory	miRNA-like
tRNA-Ala antioverlap	iars-2		Directed	inhibitory	miRNA-like
tRNA-Ala antioverlap	inf-1		Directed	inhibitory	miRNA-like
tRNA-Ala antioverlap	ifc-1		Directed	inhibitory	miRNA-like
tRNA-Ala antioverlap	hsp-70		Directed	inhibitory	miRNA-like
tRNA-Ala antioverlap	hsp-60		Directed	inhibitory	miRNA-like
tRNA-Ala antioverlap	hsp-16.2		Directed	inhibitory	miRNA-like
tRNA-Ala antioverlap	hoe-1		Directed	inhibitory	miRNA-like
tRNA-Ala antioverlap	haf-7		Directed	inhibitory	miRNA-like
tRNA-Ala antioverlap	gst-7		Directed	inhibitory	miRNA-like
tRNA-Ala antioverlap	icl-1		Directed	inhibitory	miRNA-like
tRNA-Ala antioverlap	emb-8		Directed	inhibitory	miRNA-like
tRNA-Ala antioverlap	ech-7		Directed	inhibitory	miRNA-like
tRNA-Ala antioverlap	ech-5		Directed	inhibitory	miRNA-like
tRNA-Ala antioverlap	dif-1		Directed	inhibitory	miRNA-like
tRNA-Ala antioverlap	dhs-18		Directed	inhibitory	miRNA-like
tRNA-Ala antioverlap	dhs-14		Directed	inhibitory	miRNA-like
tRNA-Ala antioverlap	dhs-6		Directed	inhibitory	miRNA-like
tRNA-Ala antioverlap	csq-1		Directed	inhibitory	miRNA-like
tRNA-Ala antioverlap	cpr-5		Directed	inhibitory	miRNA-like
tRNA-Ala antioverlap	cpr-4		Directed	inhibitory	miRNA-like
tRNA-Ala antioverlap	cpr-1		Directed	inhibitory	miRNA-like
tRNA-Ala antioverlap	cpn-4		Directed	inhibitory	miRNA-like
tRNA-Ala antioverlap	cng-1		Directed	inhibitory	miRNA-like
tRNA-Ala antioverlap	cct-4		Directed	inhibitory	miRNA-like
tRNA-Ala antioverlap	atp-2		Directed	inhibitory	miRNA-like
tRNA-Ala antioverlap	atgp-1		Directed	inhibitory	miRNA-like
tRNA-Ala antioverlap	asm-2		Directed	inhibitory	miRNA-like
tRNA-Ala antioverlap	aps-1		Directed	inhibitory	miRNA-like
tRNA-Ala antioverlap	alh-1		Directed	inhibitory	miRNA-like
PAO_10307	rsp-2		Directed	regulatory	exon splicing enhancer (ESE)
PAO_10307	RNA C-to-U editing site no homology dat		Directed	regulatory	C-to-U RNA editing sites
PAO_10509	mvm ns2 no homology data		Directed	regulatory	exon splicing enhancer (ESE)
PAO_10509	rsp-2		Directed	regulatory	exon splicing enhancer (ESE)
PAO_10509	rsp-2		Directed	regulatory	exon splicing enhancer (ESE)
PAO_11336	rsp-3		Directed	regulatory	exon splicing enhancer (ESE)
PAO_11336	rsp-2		Directed	regulatory	exon splicing enhancer (ESE)
PAO_11336	rsp-2		Directed	regulatory	exon splicing enhancer (ESE)
PAO_12312	rsp-3		Directed	regulatory	exon splicing enhancer (ESE)
PAO_12312	let-805		Directed	regulatory	exon splicing silencer (ESS)
PAO_12312	gh-1 no homology data		Directed	regulatory	intron splicing enhancer (ISE)
PAO_12637	mvm ns2 no homology data		Directed	regulatory	exon splicing enhancer (ESE)
PAO_12638	rsp-2		Directed	regulatory	exon splicing enhancer (ESE)
PAO_12638	rsp4		Directed	regulatory	exon splicing enhancer (ESE)
PAO_12638	rsp-3		Directed	regulatory	exon splicing enhancer (ESE)
PAO_13481	rsp-2		Directed	regulatory	exon splicing enhancer (ESE)
PAO_13481	lin-14		Directed	regulatory	Transcriptional regulatory motif
PAO_14122	rsp-2		Directed	regulatory	exon splicing enhancer (ESE)
PAO_14122	lev-11		Directed	regulatory	intron splicing enhancer (ISE)
PAO_14122	tnt-4		Directed	regulatory	intron splicing enhancer (ISE)
PAO_14122	rsp-2		Directed	regulatory	exon splicing enhancer (ESE)
PAO_14122	rsp-2		Directed	regulatory	exon splicing enhancer (ESE)
PAO_14122	agr-1		Directed	regulatory	intron splicing enhancer (ISE)
PAO_14122	tnt-4		Directed	regulatory	intron splicing enhancer (ISE)
PAO_14122	rsp-2		Directed	regulatory	exon splicing enhancer (ESE)
PAO_14122	Terminal Oligopyrimidine Tract (TOP)		Directed	regulatory	untranslated region (UTR) motifs
PAO_16915	mvm ns2 no homology data		Directed	regulatory	exon splicing enhancer (ESE)
PAO_16915	ighg2 no homology data		Directed	regulatory	intron splicing enhancer (ISE)
PAO_1694	rsp-2		Directed	regulatory	exon splicing enhancer (ESE)
PAO_17225	let-805		Directed	regulatory	exon splicing silencer (ESS)
PAO_1778	bpv-1 no homology data		Directed	regulatory	exon splicing enhancer (ESE)
PAO_18130	rsp-2		Directed	regulatory	exon splicing enhancer (ESE)
PAO_18130	mrp-6		Directed	regulatory	intron splicing enhancer (ISE)
PAO_18130	caspase-2, exon 9		Directed	regulatory	intron splicing silencer (ISS)
PAO_2289	N/A		Directed	regulatory	N/A
PAO_2356	N/A		Directed	regulatory	N/A
PAO_3623	rsp-2		Directed	regulatory	exon splicing enhancer (ESE)
PAO_3623	gh-1 intron 3		Directed	regulatory	intron splicing enhancer (ISE)
PAO_3623	thyroid hormone receptor , exon 9		Directed	regulatory	intron splicing enhancer (ISE)
PAO_3830	thyroid hormone receptor , exon 9		Directed	regulatory	intron splicing enhancer (ISE)
PAO_4017	mvm ns2 no homology data		Directed	regulatory	exon splicing enhancer (ESE)
PAO_4017	rsp-3		Directed	regulatory	exon splicing enhancer (ESE)
PAO_4017	rsp-2		Directed	regulatory	exon splicing enhancer (ESE)
PAO_4017	rsp-2		Directed	regulatory	exon splicing enhancer (ESE)
PAO_4017	rsp-2		Directed	regulatory	exon splicing enhancer (ESE)
PAO_4017	thyroid hormone receptor , exon 9		Directed	regulatory	intron splicing enhancer (ISE)
PAO_4017	beta-tropomyosin exon, 6b		Directed	regulatory	intron splicing enhancer (ISE)
PAO_405	mvm ns2 no homology data	mvm ns2	Directed	regulatory	exon splicing enhancer (ESE)
PAO_4089	N/A		Directed	regulatory	none
PAO_5585	rsp-4		Directed	regulatory	exon splicing enhancer (ESE)
PAO_5585	rsp-4		Directed	regulatory	exon splicing enhancer (ESE)
PAO_5585	rsp-3		Directed	regulatory	exon splicing enhancer (ESE)
PAO_5585	beta-tropomyosin, exon 6b		Directed	regulatory	intron splicing enhancer (ISE)
PAO_6120	rsp-4		Directed	regulatory	exon splicing enhancer (ESE)
PAO_6120	rsp-4		Directed	regulatory	exon splicing enhancer (ESE)
PAO_6403	N/A		Directed	regulatory	N/A
PAO_663	beta-tropomyosin, exon 6b		Directed	regulatory	intron splicing enhancer (ISE)
PAO_663	RNA C-to-U editing site		Directed	regulatory	C-to-U RNA editing sites
PAO_6819	rsp-2		Directed	regulatory	exon splicing enhancer (ESE)
PAO_6819	che-1		Directed	regulatory	Transcriptional regulatory motif
PAO_7116	gh exon 5		Directed	regulatory	exon splicing enhancer (ESE)
PAO_7116	let-805		Directed	regulatory	exon splicing silencer (ESS)
PAO_7116	beta-tropomyosin exon, 6b		Directed	regulatory	intron splicing enhancer (ISE)
PAO_7305	beta-globin exon 2		Directed	regulatory	exon splicing enhancer (ESE)
PAO_7374	rsp-2		Directed	regulatory	exon splicing enhancer (ESE)
PAO_7374	rsp-4		Directed	regulatory	exon splicing enhancer (ESE)
PAO_7374	rsp-4		Directed	regulatory	exon splicing enhancer (ESE)
PAO_7469	rsp-3		Directed	regulatory	exon splicing enhancer (ESE)
PAO_7469	rsp-2		Directed	regulatory	exon splicing enhancer (ESE)
PAO_7469	rsp-2		Directed	regulatory	exon splicing enhancer (ESE)
PAO_858	gh1: growth hormone 1, exon3		Directed	regulatory	exon splicing enhancer (ESE)
PAO_8690	rsp-2		Directed	regulatory	exon splicing enhancer (ESE)
PAO_9364	rsp-2		Directed	regulatory	exon splicing enhancer (ESE)
PAO_9364	rsp-2		Directed	regulatory	exon splicing enhancer (ESE)
PAO_9364	rsp-2		Directed	regulatory	exon splicing enhancer (ESE)
PAO_9364	rsp-3		Directed	regulatory	exon splicing enhancer (ESE)
PAO_9364	c-src, exon n1		Directed	regulatory	intron splicing silencer (ISS)
PAO_1343	RNA C-to-U editing site		Directed	regulatory	RNA editing sites
PAO_1344	tRNA motif		Directed	regulatory	functional RNA sequences
PAO_1976	rsp-2		Directed	regulatory	exon splicing enhancer (ESE)
PAO_1976	rsp-2		Directed	regulatory	exon splicing enhancer (ESE)
PAO_1976	sc35 - exonic splicing enhancer		Directed	regulatory	exon splicing enhancer (ESE)
PAO_1976	agrin y, exon 28		Directed	regulatory	intron splicing enhancer (ISE)
PAO_1976	thyroid hormone receptor, exon 9		Directed	regulatory	intron splicing enhancer (ISE)
PAO_1976	ß-tropomyosin, exon 6b		Directed	regulatory	intron splicing enhancer (ISE)
PAO_1976	RNA C-to-U editing site		Directed	regulatory	RNA editing sites
PAO_1980	mvm ns2		Directed	regulatory	exon splicing enhancer (ESE)
PAO_2097	gh exon 5		Directed	regulatory	exon splicing enhancer (ESE)
PAO_2097	gh-1 intron 3		Directed	regulatory	intron splicing enhancer (ISE)
PAO_2097	ctnt exon 5		Directed	regulatory	intron splicing enhancer (ISE)
PAO_2678	N/A		Directed	regulatory	none
PAO_5310	asf/sf2 - exonic splicing enhancer		Directed	regulatory	exon splicing enhancer (ESE)
PAO_5310	thyroid hormone receptor exon 9		Directed	regulatory	intron splicing enhancer (ISE)
PAO_5313	mvm ns2		Directed	regulatory	exon splicing enhancer (ESE)
PAO_5313	srp55-exonic splicing enhancer		Directed	regulatory	exon splicing enhancer (ESE)
PAO_5313	fibronectin eda exon		Directed	regulatory	exon splicing silencer (ESS)
PAO_5313	ighg2 cgamma2 (immunoglobulin heavy chain subclass g2 - cgamma2 gene) - intron 1		Directed	regulatory	intron splicing enhancer (ISE)
PAO_5313	c-src, exon n1		Directed	regulatory	intron splicing silencer (ISS)
PAO_5313	tRNA_Leucine		Directed	regulatory	functional RNA sequences
PAO_5313	tRNA_Leucine		Directed	regulatory	functional RNA sequences
PAO_5313	tRNA_Leucine		Directed	regulatory	functional RNA sequences
PAO_5313	tRNA_Leucine		Directed	regulatory	functional RNA sequences
PAO_5313	tRNA_Leucine		Directed	regulatory	functional RNA sequences
PAO_5313	tRNA_Leucine		Directed	regulatory	functional RNA sequences
PAO_5313	tRNA_Leucine		Directed	regulatory	functional RNA sequences
PAO_5313	tRNA_Leucine		Directed	regulatory	functional RNA sequences
PAO_5313	tRNA_Leucine		Directed	regulatory	functional RNA sequences
PAO_5440	GH exon 5		Directed	regulatory	exon splicing enhancer (ESE)
PAO_5440	ctnt, exon 5		Directed	regulatory	intron splicing enhancer (ISE)
PAO_6246	bpv-1 late exon 2		Directed	regulatory	exon splicing enhancer (ESE)
PAO_6246	gh-1, exon 3		Directed	regulatory	exon splicing enhancer (ESE)
PAO_6246	rsp-2		Directed	regulatory	exon splicing enhancer (ESE)
PAO_6246	fn eda		Directed	regulatory	exon splicing silencer (ESS)
PAO_6246	lin-14		Directed	regulatory	Transcriptional regulatory motif
PAO_6246	RNA C-to-U editing site		Directed	regulatory	RNA editing sites
PAO_7207	rsp-2		Directed	regulatory	exon splicing enhancer (ESE)
PAO_7207	asf/sf2 - exonic splicing enhancer		Directed	regulatory	exon splicing enhancer (ESE)
PAO_7207	gh-1 intron 3		Directed	regulatory	intron splicing enhancer (ISE)
PAO_8219	mvm ns2		Directed	regulatory	exon splicing enhancer (ESE)
PAO_8220	sc35 - exonic splicing enhancer		Directed	regulatory	exon splicing enhancer (ESE)
PAO_8334	agrin y, exon 28		Directed	regulatory	intron splicing enhancer (ISE)
PAO_8335	β-tropomyosin exon, 6b		Directed	regulatory	intron splicing enhancer (ISE)
PAO_8684	sex lethal, exon 3		Directed	regulatory	intron splicing silencer (ISS)
PAO_8684	transformer, exon 2		Directed	regulatory	intron splicing silencer (ISS)
PAO_8684	Terminal Oligopyrimidine Tract (TOP)		Directed	regulatory	untranslated region (UTR) motifs
PAO_8684	RNA C-to-U editing site		Directed	regulatory	RNA editing sites
PAO_8684	P_16		Directed	regulatory	functional RNA sequences
PAO_8684	P_16		Directed	regulatory	functional RNA sequences
PAO_8684	P_16		Directed	regulatory	functional RNA sequences
PAO_8684	P_16		Directed	regulatory	functional RNA sequences
PAO_8684	P_16		Directed	regulatory	functional RNA sequences
PAO_8684	tRNA_histidine		Directed	regulatory	functional RNA sequences
PAO_8985	asf/ sf2-exonic splicing enhancer		Directed	regulatory	exon splicing enhancer (ESE)
PAO_8985	rsp-2		Directed	regulatory	exon splicing enhancer (ESE)
PAO_8985	rsp-2		Directed	regulatory	exon splicing enhancer (ESE)
PAO_8985	ctnt, exon 5		Directed	regulatory	intron splicing enhancer (ISE)
PAO_8985	tRNA_Proline		Directed	regulatory	functional RNA sequences
PAO_8985	tRNA_Proline		Directed	regulatory	functional RNA sequences
PAO_8985	tRNA_Proline		Directed	regulatory	functional RNA sequences
PAO_8985	tRNA_Proline		Directed	regulatory	functional RNA sequences
PAO_8985	tRNA_Proline		Directed	regulatory	functional RNA sequences
PAO_8985	tRNA_Proline		Directed	regulatory	functional RNA sequences
PAO_8985	tRNA_Proline		Directed	regulatory	functional RNA sequences
PAO_8985	tRNA_Proline		Directed	regulatory	functional RNA sequences
PAO_8985	tRNA_Proline		Directed	regulatory	functional RNA sequences
PAO_8985	tRNA_Proline		Directed	regulatory	functional RNA sequences
PAO_8985	tRNA_Proline		Directed	regulatory	functional RNA sequences
PAO_8985	tRNA_Proline		Directed	regulatory	functional RNA sequences
PAO_8985	tRNA_Proline		Directed	regulatory	functional RNA sequences
PAO_8985	tRNA_Proline		Directed	regulatory	functional RNA sequences
PAO_8985	tRNA_Proline		Directed	regulatory	functional RNA sequences
PAO_8985	tRNA_Proline		Directed	regulatory	functional RNA sequences
PAO_8985	tRNA_Proline		Directed	regulatory	functional RNA sequences
PAO_8985	tRNA_Proline		Directed	regulatory	functional RNA sequences
PAO_8985	tRNA_Proline		Directed	regulatory	functional RNA sequences
PAO_8985	tRNA_Proline		Directed	regulatory	functional RNA sequences
PAO_8985	tRNA_Proline		Directed	regulatory	functional RNA sequences
PAO_8985	tRNA_Proline		Directed	regulatory	functional RNA sequences
PAO_8985	tRNA_Proline		Directed	regulatory	functional RNA sequences
PAO_8985	tRNA_Proline		Directed	regulatory	functional RNA sequences
PAO_8985	tRNA_Proline		Directed	regulatory	functional RNA sequences
PAO_8985	tRNA_Proline		Directed	regulatory	functional RNA sequences
PAO_8985	tRNA_Proline		Directed	regulatory	functional RNA sequences
PAO_8985	tRNA_Proline		Directed	regulatory	functional RNA sequences
PAO_8985	tRNA_Proline		Directed	regulatory	functional RNA sequences
PAO_8985	tRNA_Proline		Directed	regulatory	functional RNA sequences
PAO_8985	tRNA_Proline		Directed	regulatory	functional RNA sequences
PAO_8985	tRNA_Proline		Directed	regulatory	functional RNA sequences
PAO_8985	tRNA_Proline		Directed	regulatory	functional RNA sequences
PAO_8985	tRNA_Alanine		Directed	regulatory	functional RNA sequences
PAO_8985	tRNA_Proline		Directed	regulatory	functional RNA sequences
PAO_8985	tRNA_Arginine		Directed	regulatory	functional RNA sequences
PAO_8985	tRNA_Proline		Directed	regulatory	functional RNA sequences
PAO_8985	tRNA_Proline		Directed	regulatory	functional RNA sequences
PAO_8985	tRNA_Proline		Directed	regulatory	functional RNA sequences
PAO_8985	tRNA_Proline		Directed	regulatory	functional RNA sequences
PAO_8985	tRNA_Proline		Directed	regulatory	functional RNA sequences
PAO_8985	tRNA_Proline		Directed	regulatory	functional RNA sequences
PAO_8985	tRNA_Proline		Directed	regulatory	functional RNA sequences
PAO_8985	tRNA_Proline		Directed	regulatory	functional RNA sequences
PAO_8985	tRNA_Valine		Directed	regulatory	functional RNA sequences
PAO_8985	tRNA_Tyrosine		Directed	regulatory	functional RNA sequences
PAO_8985	tRNA_Tyrosine		Directed	regulatory	functional RNA sequences
PAO_8985	tRNA_Methinine		Directed	regulatory	functional RNA sequences
PAO_8985	tRNA_Proline		Directed	regulatory	functional RNA sequences
PAO_8985	tRNA_Lysine		Directed	regulatory	functional RNA sequences
PAO_8985	tRNA_Proline		Directed	regulatory	functional RNA sequences
PAO_8985	tRNA_Proline		Directed	regulatory	functional RNA sequences
PAO_8985	tRNA_Isoleucine		Directed	regulatory	functional RNA sequences
PAO_8985	tRNA_Glutamine		Directed	regulatory	functional RNA sequences
PAO_9524	rsp-4		Directed	regulatory	exon splicing enhancer (ESE)
PAO_9524	rsp-4		Directed	regulatory	exon splicing enhancer (ESE)
PAO_9524	fn eda		Directed	regulatory	exon splicing silencer (ESS)
PAO_9524	cftr, intron 9		Directed	regulatory	intron splicing enhancer (ISE)
PAO_9524	RNA C-to-U editing site		Directed	regulatory	RNA editing sites
PAO_9937	rsp-2		Directed	regulatory	exon splicing enhancer (ESE)
PAO_9937	rsp-2		Directed	regulatory	exon splicing enhancer (ESE)
PAO_9937	rsp-4		Directed	regulatory	exon splicing enhancer (ESE)
PAO_9937	rsp-4		Directed	regulatory	exon splicing enhancer (ESE)
PAO_9937	rsp-2		Directed	regulatory	exon splicing enhancer (ESE)
PAO_9937	rsp-4		Directed	regulatory	exon splicing enhancer (ESE)
PAO_9937	asf/sf2 - exonic splicing enhancer		Directed	regulatory	exon splicing enhancer (ESE)
PAO_9937	RNA C-to-U editing site		Directed	regulatory	RNA editing sites
PAO_10341	N/A		Directed	regulatory	none
PAO_10576	asf/ sf2-exonic splicing enhancer		Directed	regulatory	exon splicing enhancer (ESE)
PAO_10576	asf/sf2 - exonic splicing enhancer		Directed	regulatory	exon splicing enhancer (ESE)
PAO_10576	β-tropomyosin, exon 6b		Directed	regulatory	intron splicing enhancer (ISE)
PAO_10576	c-src, exon n1		Directed	regulatory	intron splicing silencer (ISS)
PAO_11728	mvm ns2		Directed	regulatory	exon splicing enhancer (ESE)
PAO_11728	srp55 - exonic splicing enhancer		Directed	regulatory	exon splicing enhancer (ESE)
PAO_11728	ighg2 cgamma2 (immunoglobulin heavy chain subclass g2 - cgamma2 gene) - intron 1		Directed	regulatory	intron splicing enhancer (ISE)
PAO_11728	c-src, exon n1		Directed	regulatory	intron splicing silencer (ISS)
PAO_11728	FR402971/transfer_RNA_(tRNA),_CAA_(Leu/L)_Leucine		Directed	regulatory	functional RNA sequences
PAO_13084	mvm ns2		Directed	regulatory	exon splicing enhancer (ESE)
PAO_13084	rsp-2		Directed	regulatory	exon splicing enhancer (ESE)
PAO_13084	rsp-2		Directed	regulatory	exon splicing enhancer (ESE)
PAO_13084	rsp-2		Directed	regulatory	exon splicing enhancer (ESE)
TP_nested_tRNA_Ala	fibronectin eda exon		Directed	regulatory	exon splicing silencer (ESS)
PAO_13122	RNA C-to-U editing site		Directed	regulatory	RNA editing sites
PAO_13124	rsp-4		Directed	regulatory	exon splicing enhancer (ESE)
PAO_13124	RNA C-to-U editing site		Directed	regulatory	RNA editing sites
PAO_14303	N/A		Directed	regulatory	none
PAO_14309	rsp-4		Directed	regulatory	exon splicing enhancer (ESE)
PAO_14309	rsp-4		Directed	regulatory	exon splicing enhancer (ESE)
PAO_14309	rsp-2		Directed	regulatory	exon splicing enhancer (ESE)
PAO_14838	N/A		Directed	regulatory	none
PAO_14912	rsp-2		Directed	regulatory	exon splicing enhancer (ESE)
PAO_14912	rsp-2		Directed	regulatory	exon splicing enhancer (ESE)
PAO_14912	rsp-2		Directed	regulatory	exon splicing enhancer (ESE)
PAO_14912	Musashi binding element (MBE)		Directed	regulatory	untranslated region (UTR) motifs
PAO_14955	fibronectin eda exon		Directed	regulatory	exon splicing silencer (ESS)
PAO_14959	RNA C-to-U editing site		Directed	regulatory	RNA editing sites
PAO_14961	sc35 - exonic splicing enhancer		Directed	regulatory	exon splicing enhancer (ESE)
PAO_14961	RNA C-to-U editing site		Directed	regulatory	RNA editing sites
PAO_15143	rsp-2		Directed	regulatory	exon splicing enhancer (ESE)
PAO_15143	rsp-2		Directed	regulatory	exon splicing enhancer (ESE)
PAO_15143	Polyadenylation Signal (PAS)		Directed	regulatory	untranslated region (UTR) motifs
PAO_15144	fibronectin eda exon		Directed	regulatory	exon splicing enhancer (ESE)
PAO_15144	gh exon 5		Directed	regulatory	exon splicing enhancer (ESE)
PAO_15144	hiv-1 tat exon 3		Directed	regulatory	exon splicing enhancer (ESE)
PAO_15144	beta-tm exon 5, 6		Directed	regulatory	exon splicing enhancer (ESE)
PAO_15144	sr protein 9g8 exon 3		Directed	regulatory	exon splicing enhancer (ESE)
PAO_15144	xi collagen, exon 6b		Directed	regulatory	exon splicing enhancer (ESE)
PAO_15144	bpv-1 late exon 2		Directed	regulatory	exon splicing enhancer (ESE)
PAO_15144	bpv-1 late exon 2		Directed	regulatory	exon splicing enhancer (ESE)
PAO_15144	gh-1, exon 3		Directed	regulatory	exon splicing enhancer (ESE)
PAO_15144	gh-1, exon 3		Directed	regulatory	exon splicing enhancer (ESE)
PAO_15144	asf/ sf2-exonic splicing enhancer		Directed	regulatory	exon splicing enhancer (ESE)
PAO_15144	srp40-exonic splicing enhancer		Directed	regulatory	exon splicing enhancer (ESE)
PAO_15144	sc35 - exonic splicing enhancer		Directed	regulatory	exon splicing enhancer (ESE)
PAO_15144	sc35 - exonic splicing enhancer		Directed	regulatory	exon splicing enhancer (ESE)
PAO_15144	rsp-2		Directed	regulatory	exon splicing enhancer (ESE)
PAO_15144	Polyadenylation Signal (PAS)		Directed	regulatory	untranslated region (UTR) motifs
PAO_15144	RNA C-to-U editing site		Directed	regulatory	RNA editing sites
PAO_15146	RNA C-to-U editing site		Directed	regulatory	RNA editing sites
PAO_15146	rsp-2		Directed	regulatory	exon splicing enhancer (ESE)
PAO_15146	rsp-2		Directed	regulatory	exon splicing enhancer (ESE)
PAO_15146	fibronectin eda exon		Directed	regulatory	exon splicing silencer (ESS)
PAO_15146	Terminal Oligopyrimidine Tract (TOP)		Directed	regulatory	untranslated region (UTR) motifs
PAO_15146	Polyadenylation Signal (PAS)		Directed	regulatory	untranslated region (UTR) motifs
PAO_15266	rsp-2		Directed	regulatory	exon splicing enhancer (ESE)
PAO_15266	rsp-2		Directed	regulatory	exon splicing enhancer (ESE)
PAO_15266	β-tropomyosin, exon 6b		Directed	regulatory	intron splicing enhancer (ISE)
PAO_15266	ctnt, exon 5		Directed	regulatory	intron splicing enhancer (ISE)
PAO_16316	rsp-2		Directed	regulatory	exon splicing enhancer (ESE)
PAO_16316	rsp-2		Directed	regulatory	exon splicing enhancer (ESE)
PAO_16745	mvm ns2		Directed	regulatory	exon splicing enhancer (ESE)
PAO_16745	rsp-2		Directed	regulatory	exon splicing enhancer (ESE)
PAO_16745	asf/sf2 - exonic splicing enhancer		Directed	regulatory	exon splicing enhancer (ESE)
PAO_16745	bpv-1 late rna		Directed	regulatory	exon splicing silencer (ESS)
PAO_16745	gh1:growth hormone 1, intron3		Directed	regulatory	intron splicing enhancer (ISE)
PAO_16745	β-tropomyosin, exon 6b		Directed	regulatory	intron splicing enhancer (ISE)
PAO_16745	β-tropomyosin exon, 6b		Directed	regulatory	intron splicing enhancer (ISE)
PAO_16745	tRNA		Directed	regulatory	functional RNA sequences
PAO_16745	tRNA		Directed	regulatory	functional RNA sequences
PAO_16745	tRNA		Directed	regulatory	functional RNA sequences
PAO_16745	tRNA		Directed	regulatory	functional RNA sequences
PAO_16745	tRNA		Directed	regulatory	functional RNA sequences
PAO_16745	tRNA		Directed	regulatory	functional RNA sequences
PAO_16745	tRNA		Directed	regulatory	functional RNA sequences
PAO_16745	tRNA		Directed	regulatory	functional RNA sequences
PAO_16745	tRNA		Directed	regulatory	functional RNA sequences
PAO_16745	tRNA		Directed	regulatory	functional RNA sequences
PAO_16745	tRNA		Directed	regulatory	functional RNA sequences
PAO_16745	tRNA		Directed	regulatory	functional RNA sequences
PAO_16745	tRNA		Directed	regulatory	functional RNA sequences
PAO_16745	tRNA		Directed	regulatory	functional RNA sequences
PAO_16745	tRNA		Directed	regulatory	functional RNA sequences
PAO_16745	tRNA		Directed	regulatory	functional RNA sequences
PAO_16745	tRNA		Directed	regulatory	functional RNA sequences
PAO_16745	tRNA		Directed	regulatory	functional RNA sequences
PAO_16745	tRNA		Directed	regulatory	functional RNA sequences
PAO_16745	tRNA		Directed	regulatory	functional RNA sequences
PAO_16745	tRNA		Directed	regulatory	functional RNA sequences
PAO_16745	tRNA		Directed	regulatory	functional RNA sequences
PAO_16745	tRNA		Directed	regulatory	functional RNA sequences
PAO_16745	tRNA		Directed	regulatory	functional RNA sequences
PAO_16745	tRNA		Directed	regulatory	functional RNA sequences
PAO_16745	tRNA		Directed	regulatory	functional RNA sequences
PAO_16745	tRNA		Directed	regulatory	functional RNA sequences
PAO_16745	tRNA		Directed	regulatory	functional RNA sequences
PAO_16745	tRNA		Directed	regulatory	functional RNA sequences
PAO_16745	tRNA		Directed	regulatory	functional RNA sequences
PAO_16745	tRNA		Directed	regulatory	functional RNA sequences
PAO_16745	tRNA		Directed	regulatory	functional RNA sequences
PAO_16745	tRNA		Directed	regulatory	functional RNA sequences
PAO_16745	tRNA		Directed	regulatory	functional RNA sequences
PAO_16745	tRNA		Directed	regulatory	functional RNA sequences
PAO_16745	tRNA		Directed	regulatory	functional RNA sequences
PAO_16745	tRNA		Directed	regulatory	functional RNA sequences
PAO_16745	tRNA		Directed	regulatory	functional RNA sequences
PAO_16745	tRNA		Directed	regulatory	functional RNA sequences
PAO_16745	tRNA		Directed	regulatory	functional RNA sequences
PAO_16745	tRNA		Directed	regulatory	functional RNA sequences
PAO_16745	tRNA		Directed	regulatory	functional RNA sequences
PAO_16745	tRNA		Directed	regulatory	functional RNA sequences
PAO_16745	tRNA		Directed	regulatory	functional RNA sequences
PAO_16745	tRNA		Directed	regulatory	functional RNA sequences
PAO_16745	tRNA		Directed	regulatory	functional RNA sequences
PAO_16745	tRNA		Directed	regulatory	functional RNA sequences
PAO_16745	tRNA		Directed	regulatory	functional RNA sequences
PAO_16745	tRNA		Directed	regulatory	functional RNA sequences
PAO_16745	tRNA		Directed	regulatory	functional RNA sequences
PAO_16745	tRNA		Directed	regulatory	functional RNA sequences
PAO_16745	tRNA		Directed	regulatory	functional RNA sequences
PAO_16745	tRNA		Directed	regulatory	functional RNA sequences
PAO_16745	tRNA		Directed	regulatory	functional RNA sequences
PAO_16745	tRNA		Directed	regulatory	functional RNA sequences
PAO_16745	tRNA		Directed	regulatory	functional RNA sequences
PAO_16745	tRNA		Directed	regulatory	functional RNA sequences
PAO_16745	tRNA		Directed	regulatory	functional RNA sequences
PAO_16745	tRNA		Directed	regulatory	functional RNA sequences
PAO_16745	tRNA		Directed	regulatory	functional RNA sequences
PAO_16745	tRNA		Directed	regulatory	functional RNA sequences
PAO_16745	tRNA		Directed	regulatory	functional RNA sequences
PAO_16745	tRNA		Directed	regulatory	functional RNA sequences
PAO_16745	tRNA		Directed	regulatory	functional RNA sequences
PAO_16745	tRNA		Directed	regulatory	functional RNA sequences
PAO_16745	tRNA		Directed	regulatory	functional RNA sequences
PAO_16745	tRNA		Directed	regulatory	functional RNA sequences
PAO_16745	tRNA		Directed	regulatory	functional RNA sequences
PAO_16745	tRNA		Directed	regulatory	functional RNA sequences
PAO_16745	tRNA		Directed	regulatory	functional RNA sequences
PAO_16745	tRNA		Directed	regulatory	functional RNA sequences
PAO_16745	tRNA		Directed	regulatory	functional RNA sequences
PAO_16745	tRNA		Directed	regulatory	functional RNA sequences
PAO_16745	tRNA		Directed	regulatory	functional RNA sequences
PAO_16745	tRNA		Directed	regulatory	functional RNA sequences
PAO_16745	tRNA		Directed	regulatory	functional RNA sequences
PAO_16745	tRNA		Directed	regulatory	functional RNA sequences
PAO_16745	tRNA		Directed	regulatory	functional RNA sequences
PAO_16745	tRNA		Directed	regulatory	functional RNA sequences
PAO_16745	tRNA		Directed	regulatory	functional RNA sequences
PAO_16745	tRNA		Directed	regulatory	functional RNA sequences
PAO_16745	tRNA		Directed	regulatory	functional RNA sequences
PAO_16745	tRNA		Directed	regulatory	functional RNA sequences
PAO_16745	tRNA		Directed	regulatory	functional RNA sequences
PAO_16745	tRNA		Directed	regulatory	functional RNA sequences
PAO_16745	tRNA		Directed	regulatory	functional RNA sequences
PAO_16745	tRNA		Directed	regulatory	functional RNA sequences
PAO_16745	tRNA		Directed	regulatory	functional RNA sequences
PAO_16745	tRNA		Directed	regulatory	functional RNA sequences
PAO_16745	tRNA		Directed	regulatory	functional RNA sequences
PAO_16745	tRNA		Directed	regulatory	functional RNA sequences
PAO_16745	tRNA		Directed	regulatory	functional RNA sequences
PAO_16745	tRNA		Directed	regulatory	functional RNA sequences
PAO_16745	tRNA		Directed	regulatory	functional RNA sequences
PAO_16745	tRNA		Directed	regulatory	functional RNA sequences
PAO_16745	tRNA		Directed	regulatory	functional RNA sequences
PAO_16745	tRNA		Directed	regulatory	functional RNA sequences
PAO_16745	tRNA		Directed	regulatory	functional RNA sequences
PAO_16745	tRNA		Directed	regulatory	functional RNA sequences
PAO_16745	tRNA		Directed	regulatory	functional RNA sequences
PAO_16745	tRNA		Directed	regulatory	functional RNA sequences
PAO_16745	tRNA		Directed	regulatory	functional RNA sequences
PAO_16745	tRNA		Directed	regulatory	functional RNA sequences
PAO_16745	tRNA		Directed	regulatory	functional RNA sequences
PAO_16745	tRNA		Directed	regulatory	functional RNA sequences
PAO_16745	tRNA		Directed	regulatory	functional RNA sequences
PAO_16745	tRNA		Directed	regulatory	functional RNA sequences
PAO_16745	tRNA		Directed	regulatory	functional RNA sequences
PAO_16745	tRNA		Directed	regulatory	functional RNA sequences
PAO_16745	tRNA		Directed	regulatory	functional RNA sequences
PAO_16745	tRNA		Directed	regulatory	functional RNA sequences
PAO_16745	tRNA		Directed	regulatory	functional RNA sequences
PAO_16745	tRNA		Directed	regulatory	functional RNA sequences
PAO_16745	tRNA		Directed	regulatory	functional RNA sequences
PAO_16745	tRNA		Directed	regulatory	functional RNA sequences
PAO_16745	tRNA		Directed	regulatory	functional RNA sequences
PAO_16745	tRNA		Directed	regulatory	functional RNA sequences
PAO_16745	tRNA		Directed	regulatory	functional RNA sequences
PAO_16745	tRNA		Directed	regulatory	functional RNA sequences
PAO_16745	tRNA		Directed	regulatory	functional RNA sequences
PAO_16745	tRNA		Directed	regulatory	functional RNA sequences
PAO_16745	tRNA		Directed	regulatory	functional RNA sequences
PAO_16745	tRNA		Directed	regulatory	functional RNA sequences
PAO_16745	tRNA_Phenylalanine		Directed	regulatory	functional RNA sequences
PAO_16745	tRNA_Phenylalanine		Directed	regulatory	functional RNA sequences
PAO_16745	tRNA_Phenylalanine		Directed	regulatory	functional RNA sequences
PAO_16745	tRNA_Phenylalanine		Directed	regulatory	functional RNA sequences
PAO_16745	tRNA_Phenylalanine		Directed	regulatory	functional RNA sequences
PAO_16745	tRNA_Phenylalanine		Directed	regulatory	functional RNA sequences
PAO_16745	tRNA_Phenylalanine		Directed	regulatory	functional RNA sequences
PAO_16745	tRNA_Phenylalanine		Directed	regulatory	functional RNA sequences
PAO_16745	tRNA_Phenylalanine		Directed	regulatory	functional RNA sequences
PAO_16745	tRNA_Phenylalanine		Directed	regulatory	functional RNA sequences
PAO_16745	tRNA_Phenylalanine		Directed	regulatory	functional RNA sequences
PAO_16745	tRNA_Phenylalanine		Directed	regulatory	functional RNA sequences
PAO_16745	tRNA_Phenylalanine		Directed	regulatory	functional RNA sequences
PAO_16745	tRNA_Phenylalanine		Directed	regulatory	functional RNA sequences
PAO_16745	tRNA_Phenylalanine		Directed	regulatory	functional RNA sequences
PAO_16745	tRNA_Phenylalanine		Directed	regulatory	functional RNA sequences
PAO_16745	tRNA_Phenylalanine		Directed	regulatory	functional RNA sequences
PAO_16745	tRNA_Phenylalanine		Directed	regulatory	functional RNA sequences
PAO_16745	tRNA_Phenylalanine		Directed	regulatory	functional RNA sequences
PAO_16745	tRNA_Phenylalanine		Directed	regulatory	functional RNA sequences
PAO_16745	tRNA_Phenylalanine		Directed	regulatory	functional RNA sequences
PAO_16745	tRNA_Phenylalanine		Directed	regulatory	functional RNA sequences
PAO_16745	tRNA_Phenylalanine		Directed	regulatory	functional RNA sequences
PAO_16745	tRNA_Phenylalanine		Directed	regulatory	functional RNA sequences
PAO_16745	tRNA_Phenylalanine		Directed	regulatory	functional RNA sequences
PAO_16745	tRNA_Phenylalanine		Directed	regulatory	functional RNA sequences
PAO_16745	tRNA_Histidine		Directed	regulatory	functional RNA sequences
PAO_16745	tRNA_Phenylalanine		Directed	regulatory	functional RNA sequences
PAO_16745	tRNA_Phenylalanine		Directed	regulatory	functional RNA sequences
PAO_16745	tRNA_Phenylalanine		Directed	regulatory	functional RNA sequences
PAO_16745	tRNA_Phenylalanine		Directed	regulatory	functional RNA sequences
PAO_16745	tRNA		Directed	regulatory	functional RNA sequences
PAO_16745	tRNA_Phenylalanine		Directed	regulatory	functional RNA sequences
PAO_16745	tRNA_Phenylalanine		Directed	regulatory	functional RNA sequences
PAO_16745	tRNA		Directed	regulatory	functional RNA sequences
PAO_16745	tRNA		Directed	regulatory	functional RNA sequences
PAO_16745	tRNA		Directed	regulatory	functional RNA sequences
PAO_16745	tRNA		Directed	regulatory	functional RNA sequences
PAO_16745	tRNA		Directed	regulatory	functional RNA sequences
PAO_16745	tRNA		Directed	regulatory	functional RNA sequences
PAO_16745	tRNA		Directed	regulatory	functional RNA sequences
PAO_16745	tRNA		Directed	regulatory	functional RNA sequences
PAO_16745	tRNA		Directed	regulatory	functional RNA sequences
PAO_16745	tRNA		Directed	regulatory	functional RNA sequences
PAO_16745	tRNA		Directed	regulatory	functional RNA sequences
PAO_16745	tRNA		Directed	regulatory	functional RNA sequences
PAO_16745	tRNA		Directed	regulatory	functional RNA sequences
PAO_16745	tRNA		Directed	regulatory	functional RNA sequences
PAO_16745	tRNA		Directed	regulatory	functional RNA sequences
PAO_16745	tRNA		Directed	regulatory	functional RNA sequences
PAO_16745	tRNA		Directed	regulatory	functional RNA sequences
PAO_16745	tRNA		Directed	regulatory	functional RNA sequences
PAO_17696	mvm ns2		Directed	regulatory	exon splicing enhancer (ESE)
PAO_17696	srp40-exonic splicing enhancer		Directed	regulatory	exon splicing enhancer (ESE)
PAO_17696	srp55-exonic splicing enhancer		Directed	regulatory	exon splicing enhancer (ESE)
PAO_17696	srp40 - exonic splicing enhancer		Directed	regulatory	exon splicing enhancer (ESE)
PAO_17729	fibronectin eda exon		Directed	regulatory	exon splicing silencer (ESS)
PAO_17733	RNA C-to-U editing site		Directed	regulatory	RNA editing sites
PAO_17758	srp40-exonic splicing enhancer		Directed	regulatory	exon splicing enhancer (ESE)
PAO_17758	srp40 - exonic splicing enhancer		Directed	regulatory	exon splicing enhancer (ESE)
PAO_17758	caspase-2, exon 9		Directed	regulatory	intron splicing silencer (ISS)
PAO_18150	gh exon 5		Directed	regulatory	exon splicing enhancer (ESE)
PAO_18150	rsp-2		Directed	regulatory	exon splicing enhancer (ESE)
PAO_18150	gh-1 intron 3		Directed	regulatory	intron splicing enhancer (ISE)
PAO_18150	gh-1 intron 3		Directed	regulatory	intron splicing enhancer (ISE)
PAO_18150	β-tropomyosin exon, 6b		Directed	regulatory	intron splicing enhancer (ISE)
PAO_18150	β-tropomyosin exon, 6b		Directed	regulatory	intron splicing enhancer (ISE)
PAO_18150	Polyadenylation Signal (PAS)		Directed	regulatory	untranslated region (UTR) motifs

## Sheet: Hoja 10
microRna sizes		induced
PAO_13056		sRNAs of interaction
PAO_14914		PAO_13118		rojo:ambos
PAO_17689		PAO_14838
PAO_14944		PAO_14955
PAO_1990		PAO_17729
PAO_13100		PAO_1980
PAO_17718		PAO_10341
PAO_13108		PAO_2678
PAO_14936		PAO_14309
PAO_1999		PAO_5310
PAO_13120		PAO_1343
PAO_17731		PAO_13124
PAO_14957		PAO_14303
PAO_1978		PAO_16316
PAO_2008		PAO_14959
PAO_2386		PAO_14961
PAO_13118		PAO_8334
PAO_14925		PAO_13122
PAO_17700		PAO_17733
PAO_13088		PAO_1976
PAO_14304		PAO_5313
PAO_17729		PAO_15147
PAO_14955		PAO_5440
PAO_1980		PAO_11728
PAO_14838		PAO_14912
PAO_17710		PAO_15146
PAO_2018		PAO_10576
PAO_14926		PAO_17758
PAO_2007		PAO_13084
PAO_17708		PAO_15144
PAO_13097		PAO_17696
PAO_14306		PAO_8684
PAO_13089		PAO_15143
PAO_17701		PAO_8219
PAO_8176		PAO_6246
PAO_3217		PAO_7207
PAO_14933		PAO_15266
PAO_15832		PAO_18150
PAO_14948		PAO_2097
PAO_13111		PAO_9524
PAO_17722		PAO_9937
PAO_1987		PAO_16745
		PAO_8985
