# Supplementary material for: Interspecies RNA Interactome of Pathogen and Host in a Heritable Defensive Strategy
Source: Front Microbiol. 2021 Jul 21;12:649858. doi: 10.3389/fmicb.2021.649858 (PMC8334366; doi:10.3389/fmicb.2021.649858)
Supplement: Supplementary Table 1 — Caenorhabditis elegans genomic annotations mapped by naïve P. aeruginosa PAO1 reads. List of C. elegans genes mapped by P. aeruginosa reads expressed in host-naïve conditions. [file Table_1.xlsx]

## Sheet: Table S1
Table S1. C. elegans genomic sequences mapped by Pseudomonas reads
Isoform name		Wormbase name	Biotype	Chromosome	CoorIni	Coorend	Strand	Naïve P. aeruginosa (TPM)			F1 P. aeruginosa (TPM)			F2 P. aeruginosa (TPM)
								Sample 1	Sample 2	Sample 3	Sample 1	Sample 2	Sample 3	Sample 1	Sample 2	Sample 3
W09D10.7	linc-109	WBGene00219615	lincRNA	III	10732273	10736681	-	118.63	0	174.741	2.47024	0	0	0	0	0
K11D9.9	linc-129	WBGene00219601	lincRNA	III	10817263	10821245	+	262.428	38.5263	0	0	0	0	0	0	0
R11B5.1	tbc-12	WBGene00044061	mRNA	X	2525191	2532457	-	72.1856	21.1948	0	0	4.25415	0	0	0	0
Y105C5A.1270	Y105C5A.1270	WBGene00194646	mRNA	IV	15845998	15846665	-	0	220.716	1107.27	15.6531	0	9.75003	0	0	0
C02F4.11	C02F4.11	WBGene00202419	ncRNA	IV	10499919	10500197	-	1688.96	0	4975.63	105.508	174.188	109.532	207.395	44.1112	0
C06E4.17	C06E4.17	WBGene00199037	ncRNA	IV	7276737	7276872	-	56125.4	8239.62	87264.9	324.639	0	80.8849	536.036	1058.67	1370.38
C18E3.10	C18E3.10	WBGene00199825	ncRNA	I	4212661	4212785	-	3335.16	0	4912.65	0	0	0	0	0	0
C34H3.11	C34H3.11	WBGene00198191	ncRNA	X	6155369	6155559	+	2352.48	0	3465.17	0	0	0	0	0	0
C43H6.11	C43H6.11	WBGene00202120	ncRNA	X	2416031	2416180	+	14397.7	845.474	8483.05	59.9607	42.4252	74.697	141.436	75.206	79.0964
C48D5.6	C48D5.6	WBGene00197446	ncRNA	III	3587601	3587747	-	2927.53	1719.13	8624.43	0	0	0	0	0	0
D1014.11	D1014.11	WBGene00201234	ncRNA	V	8141184	8141244	+	0	3291.95	8257.43	0	0	0	0	0	0
F12F6.20	F12F6.20	WBGene00219891	ncRNA	IV	11580794	11580987	+	2321.39	0	3419.38	0	0	30.1091	0	0	0
F14B8.9	F14B8.9	WBGene00196369	ncRNA	X	6898316	6898532	+	2107.82	0	3104.79	0	0	0	0	0	0
F34D10.10	F34D10.10	WBGene00199625	ncRNA	III	3740956	3741036	-	32356.9	0	6808.76	0	68.1037	0	0	0	0
F45E1.13	F45E1.13	WBGene00199098	ncRNA	X	7994361	7994537	-	5018.62	736.77	55442.8	0	0	0	0	0	0
F45E6.7	F45E6.7	WBGene00199473	ncRNA	X	12492679	12492824	+	5887.76	0	8672.61	0	0	0	0	0	0
F46C8.15	F46C8.15	WBGene00198627	ncRNA	X	7534555	7534757	+	0	655.6	3288.98	0	0	0	0	0	0
F46C8.19	F46C8.19	WBGene00200498	ncRNA	X	7544861	7545292	-	1133.24	332.735	1669.24	0	0	0	0	0	0
F56A11.12	F56A11.12	WBGene00200779	ncRNA	IV	551929	552101	-	7674.1	4506.46	0	0	0	0	0	0	0
F57B1.14	F57B1.14	WBGene00198019	ncRNA	V	13214865	13215012	+	8734.06	0	8576.78	0	0	0	0	76.037	79.9703
K07C10.5	K07C10.5	WBGene00197003	ncRNA	II	11157793	11157934	+	57212.2	736475	84273	125.404	133.094	234.335	443.706	707.796	827.122
T02C5.7	T02C5.7	WBGene00201042	ncRNA	X	2716558	2716705	+	5822.7	854.816	0	0	0	0	0	0	0
T05A6.18	T05A6.18	WBGene00201263	ncRNA	II	7812645	7812847	-	2232.86	0	3288.98	0	0	0	0	0	0
T24H7.7	T24H7.7	WBGene00199512	ncRNA	II	6234133	6234255	+	10133.7	0	4975.63	0	0	0	0	0	0
T28B4.10	T28B4.10	WBGene00197903	ncRNA	X	6574040	6574579	-	5517.85	270.02	1354.62	19.1498	0	0	0	0	0
W03G11.8	W03G11.8	WBGene00196175	ncRNA	X	12091601	12091817	-	2107.82	3094.43	9314.38	43.8912	31.0553	27.3391	51.7657	0	0
W05B2.13	W05B2.13	WBGene00199620	ncRNA	III	10967192	10967341	+	2879.53	1690.95	4241.52	119.921	0	0	70.7182	150.412	237.289
Y43F8A.8	Y43F8A.8	WBGene00200092	ncRNA	V	19393815	19393868	+	12113.9	0	8921.82	252.248	0	0	0	474.576	0
Y55F3C.14	Y55F3C.14	WBGene00196878	ncRNA	IV	743463	743762	-	1582.45	929.259	2330.93	0	23.3148	20.5248	0	0	43.4674
Y57G11C.1139	Y57G11C.1139	WBGene00200614	ncRNA	IV	14694701	14694849	+	2895.36	850.119	4264.83	0	0	0	0	0	79.5309
ZC449.9	ZC449.9	WBGene00201479	ncRNA	X	5040234	5040514	-	1678.2	8869.4	2471.97	0	0	0	0	0	0
ZK662.7	ZK662.7	WBGene00198111	ncRNA	X	15696442	15696570	-	6505.61	0	4791.35	0	0	0	0	0	0
Y45F10D.77	21ur-14288	WBGene00167753	piRNA	IV	13805840	13805860	-	19516.8	0	14374	0	0	0	0	0	0
Y73F8A.195	21ur-3672	WBGene00047399	piRNA	IV	15272925	15272945	-	29275.3	0	28748.1	0	287.549	0	0	0	0
F38C2.60	21ur-6043	WBGene00170261	piRNA	IV	16255719	16255739	-	195168	108878	129366	2235.2	1869.07	1771.98	3115.53	3058.38	3216.59
T09B4.12	mir-235	WBGene00003328	pre_miRNA	I	6162291	6162387	-	64856	2380.33	71649.1	337.625	119.443	525.752	199.099	105.867	222.687
F31C3.9	rrn-3.1	WBGene00004622	rRNA	I	15064838	15068346	+	99975.6	7556.99	117460	146965	191601	154902	106023	112452	140868
K05G3.t1	K05G3.t1	WBGene00023100	tRNA	X	16503144	16503216	-	0	1459.64	14645.3	103.517	0	0	0	0	0
K11E4.t2	K11E4.t2	WBGene00014439	tRNA	X	13716493	13716565	+	0	2919.28	7322.63	0	73.2436	0	0	0	0
M163.t1	M163.t1	WBGene00014448	tRNA	X	14486211	14486283	-	14913.8	11677.1	14645.3	207.034	146.487	128.958	0	129.837	136.553
Y17G7B.2c	ash-2	WBGene00012458	nc_primary_transcript	II	11979838	11988972	+	0	16.8763	84.6639	0	0	0	0	0	0
C01G10.10b	C01G10.10	WBGene00007237	nc_primary_transcript	V	15080168	15082420	-	0	67.6823	339.544	4.8	0	2.98984	0	0	0
C05D12.3b	C05D12.3	WBGene00014666	nc_primary_transcript	II	11425281	11430272	+	0	30.7904	154.467	0	0	0	0	0	0
Y23H5A.5e	ctn-1	WBGene00000832	nc_primary_transcript	I	2606783	2617275	+	150.187	44.097	221.223	0	0.737585	1.29865	0	1.3075	1.37513
C52E4.6c	cyl-1	WBGene00000876	nc_primary_transcript	V	11991164	11993695	-	1848.96	3257.3	4236.56	183.95	169.502	85.2681	141.271	80.4836	112.863
F18E3.7b	ddo-2	WBGene00017565	nc_primary_transcript	V	7433401	7435032	-	316.489	92.9259	0	0	4.66295	0	0	0	0
F58E10.3b	ddx-17	WBGene00010260	nc_primary_transcript	V	14009100	14011816	-	191.62	56.2624	282.254	7.98022	31.0553	12.4269	14.1179	25.0231	21.054
Y59A8B.1b	dpy-21	WBGene00001080	nc_primary_transcript	V	17936857	17949028	-	43.1753	12.6769	0	8.99042	9.54177	7.83997	3.18102	9.02102	5.9298
Y37E3.10b	eif-2alpha	WBGene00021351	nc_primary_transcript	I	2074706	2076100	+	738.032	108.349	543.556	7.68404	0	0	0	9.63774	0
F01D5.8b	F01D5.8	WBGene00008498	nc_primary_transcript	II	14010775	14013756	+	174.778	153.952	257.446	3.63941	2.57506	0	0	0	0
F28F8.7b	F28F8.7	WBGene00009224	nc_primary_transcript	V	15579093	15590617	-	91.1844	13.3865	67.1568	0	1.34345	0	0	1.19075	0
F46B6.6b	F46B6.6	WBGene00009771	nc_primary_transcript	V	9783342	9786825	-	299.661	43.9925	441.398	3.11993	2.20751	0	11.039	0	0
C32B5.17a	fbxc-17	WBGene00044419	nc_primary_transcript	II	976208	978946	-	2281.19	446.527	7840.39	19.7922	14.004	14.7939	14.0059	29.7894	31.3304
C23F12.1b	fln-2	WBGene00016006	nc_primary_transcript	X	9397752	9426683	+	0	16.025	53.5956	6.44011	5.09279	3.5395	4.91475	3.32604	4.49756
F08B1.2b	gcy-12	WBGene00001538	nc_primary_transcript	II	5312120	5319083	+	225.935	0	887.465	3.13643	1.10959	2.93044	7.39827	0	4.13738
F46C8.7b	glb-16	WBGene00018486	nc_primary_transcript	X	7538134	7540129	-	259.712	0	382.552	0	0	0	0	0	0
F25H8.3c	gon-1	WBGene00001650	nc_primary_transcript	IV	9935067	9953429	-	28.6451	8.41062	42.1939	0.596478	1.68815	1.48614	1.40698	0	3.14734
ZK381.1b	him-3	WBGene00001862	nc_primary_transcript	IV	6977526	6978536	+	1009.49	148.201	0	10.5104	0	0	0	0	0
F29G6.3e	hpo-34	WBGene00009259	nc_primary_transcript	X	11512966	11518380	-	96.7244	28.3997	142.474	2.0141	1.42508	2.50909	2.37545	0	0
Y41E3.11e	hrpu-1	WBGene00012769	nc_primary_transcript	IV	15039619	15048936	+	56.3528	16.546	83.007	3.52031	7.47239	2.19274	5.53585	2.94358	9.28754
Y51A2D.7a	ints-5	WBGene00013075	nc_primary_transcript	V	18533963	18549024	+	139.637	20.4997	51.4209	0	0.51433	1.35835	0.857332	0	0
K10C3.4c	K10C3.4	WBGene00010731	nc_primary_transcript	I	9853696	9862299	+	488.091	161.224	359.476	2.54088	1.7978	0	2.99674	0	0
C01G8.9e	let-526	WBGene00002717	nc_primary_transcript	I	5301768	5317392	-	201.924	49.4066	0	2.10234	4.95837	2.61902	4.95904	0.878956	4.62212
Y71F9B.5d	lin-17	WBGene00003006	nc_primary_transcript	I	2709919	2717345	+	70.6374	20.7402	208.096	0	1.04073	0	0	0	0
K08A8.1b	mek-1	WBGene00003185	nc_primary_transcript	X	7479256	7480579	+	3106.59	912.14	2287.98	24.2582	17.1639	15.11	28.6104	20.284	21.3333
T24A6.9d	nhr-93	WBGene00003683	nc_primary_transcript	V	3536196	3537636	-	0	104.967	526.593	0	0	9.27378	0	9.33697	0
C07G1.3b	pct-1	WBGene00003961	nc_primary_transcript	IV	8177109	8188435	+	139.161	108.959	0	4.82958	1.36687	1.80496	6.83526	4.84602	8.91923
R07B7.3b	pqn-53	WBGene00004138	nc_primary_transcript	V	12063601	12065359	-	294.06	259.021	433.147	0	12.9975	3.81405	0	7.68007	16.1547
C44C11.1b	ras-1	WBGene00004310	nc_primary_transcript	II	12347184	12352150	-	210.782	61.8887	0	4.38912	1.55276	1.36695	0	0	0
C27A2.2b	rpl-22	WBGene00004434	nc_primary_transcript	II	5055622	5056178	+	1786.29	524.48	0	0	26.318	23.1687	21.9346	23.3266	24.5333
Y116A8C.32b	sfa-1	WBGene00013808	nc_primary_transcript	IV	17104545	17110982	-	81.4333	47.82	0	1.69569	0	2.11243	1.99991	2.12683	6.71054
B0302.1c	sid-3	WBGene00002207	nc_primary_transcript	X	17186388	17192973	+	159.225	23.3754	0	1.65777	1.17296	0	0	6.23781	0
K11G12.4b	smf-1	WBGene00004876	nc_primary_transcript	X	6719800	6723043	-	1125.63	283.287	1658.04	0	0	0	0	0	0
Y45F10D.13b	sorb-1	WBGene00012891	nc_primary_transcript	IV	13761915	13770351	+	124.429	182.67	183.282	2.59098	0	0.806939	1.52791	1.62488	3.41786
T04B8.5c	T04B8.5	WBGene00020207	nc_primary_transcript	II	614953	624540	-	0	16.0817	80.6775	3.42152	0.806966	0.710402	1.34512	2.86097	0
T10B10.4b	T10B10.4	WBGene00011681	nc_primary_transcript	X	15190140	15192621	+	209.525	61.5196	0	0	3.087	0	5.1457	0	11.5106
LLC1.1b	tra-3	WBGene00006606	nc_primary_transcript	IV	14436679	14444149	-	0	20.6186	103.438	0	0	0.910817	0	0	0
W03D8.2c	W03D8.2	WBGene00020985	nc_primary_transcript	I	2798211	2800878	-	195.096	0	287.375	0	0	0	0	0	0
W03F9.2b	W03F9.2	WBGene00021000	nc_primary_transcript	V	127089	127951	-	2352.48	518.041	2598.88	0	17.3299	7.6281	14.4436	30.7203	0
W03H9.2a	W03H9.2	WBGene00012228	nc_primary_transcript	II	14142949	14143822	-	0	170.586	855.787	0	8.55989	15.0712	0	0	0
W08F4.12d	W08F4.12	WBGene00021101	nc_primary_transcript	II	582111	584403	-	0	66.5184	333.705	9.43492	0	0	0	0	0
ZC302.2b	wdr-5.3	WBGene00013862	nc_primary_transcript	V	10737118	10739111	+	259.968	0	382.93	0	0	0	0	0	0
Y105C5A.15d	Y105C5A.15	WBGene00013639	nc_primary_transcript	IV	15689201	15721805	+	145.309	0	23.7821	1.34479	0.71363	0.418823	1.18954	0.843354	0.44349
Y26D4A.5b	Y26D4A.5	WBGene00012503	nc_primary_transcript	I	13076270	13077020	+	0	197.349	990.049	0	0	0	0	0	0
Y32B12B.2c	Y32B12B.2	WBGene00012522	nc_primary_transcript	V	16538406	16549730	+	46.395	13.6223	68.3394	0.966086	0.683555	0.601759	0	0	0
Y39A1A.21b	Y39A1A.21	WBGene00012658	nc_primary_transcript	III	10700792	10707002	-	0	24.7793	124.311	1.75734	3.73021	1.09461	0	0	0
Y48E1C.1b	Y48E1C.1	WBGene00013014	nc_primary_transcript	II	13415025	13424446	+	0	16.364	82.094	0	0.821134	0	0	0	0
Y69H2.10b	Y69H2.10	WBGene00013485	nc_primary_transcript	V	18670324	18684331	+	75.0594	22.0386	165.843	0	1.10588	0	0	0	0
