# Supplementary material for: Interspecies RNA Interactome of Pathogen and Host in a Heritable Defensive Strategy
Source: Front Microbiol. 2021 Jul 21;12:649858. doi: 10.3389/fmicb.2021.649858 (PMC8334366; doi:10.3389/fmicb.2021.649858)
Supplement: Supplementary Table 2 — Host-induced sRNAs from P. aeruginosa PAO1. Bacterial sRNAs upregulated in the F1, F2, F5, and F6 C. elegans generations compared to naïve bacteria. [file Table_2.xlsx]

## Sheet: Table S2
Table S2. Host-induced sRNAs from P. aeruginosa PAO1.
	Own name	Name	Biotype	Genomic Context	F1				F2				F5				F6
					baseMean	log2FoldChange	pvalue	padj	baseMean	log2FoldChange	pvalue	padj	baseMean	log2FoldChange	pvalue	padj	baseMean	log2FoldChange	pvalue	padj
	PAO_1343	rsmY	ncRNA	nested	32.4227	3.83704	1.7e-06	7.14e-05	23.4884	3.30852	6.1e-05	0.0010317	112.521	5.58436	1.05e-12	1.3e-10	80.3057	5.36652	0.000594577	0.00924321
	PAO_10341	amiL			5.04859	5.07775	0.000239159	0.00321498	6.66531	5.44162	7.42e-05	0.00120086	30.5874	7.56898	2.02e-09	1.34e-07	30.3562	7.93384	2.44e-05	0.00119252
	PAO_15143	crcZ			24450.2	13.1399	5.78e-63	4.28e-59	4474.25	10.6715	8.69e-45	6.44e-41	28457	13.2322	2.55e-100	2.16e-96	34172.5	13.7685	1.22e-17	5.87e-14
	PAO_15144	crcZ			112.834	7.98357	4.31e-19	2.66e-16	38.7627	6.40668	6.05e-11	7.12e-09	55.6653	6.83072	1.59e-15	3.06e-13	98.4799	8.04819	2.23e-05	0.00114232
	PAO_15146	crcZ			2215.65	10.4358	2.04e-50	7.57e-47	444.936	8.09316	1.52e-29	2.81e-26	722.213	8.69365	2.37e-45	6.69e-42	986.727	9.51842	6.55e-09	5.24e-06
	PAO_15147	crcZ		anti nested	3145.7	9.60715	3.06e-31	5.66e-28	500.09	6.92225	9.59e-21	5.07e-18	3614	9.67574	4.48e-59	1.89e-55	6325.43	10.7339	1.66e-10	1.99e-07
	PAO_8684	rgsA		overlapped	69.5794	6.5005	2.31e-10	3.98e-08	91.4236	6.90242	8.06e-13	1.27e-10	572.983	9.43188	1.66e-21	6.68e-19	88.1638	7.04029	3.49e-05	0.00141425
	PAO_2678	tRNA	tRNA	anti nested	53.5077	6.83845	6.72e-12	1.72e-09	167.81	8.44174	1.68e-21	1.25e-18	125.337	7.95084	1.03e-17	3.12e-15	42.9448	6.60521	3.44e-05	0.00140977
	PAO_1980	tRNA		anti overlap	186.808	6.85749	2.39e-19	1.96e-16	212.005	6.99828	5.15e-26	7.63e-23	571.938	8.32772	7.26e-32	8.77e-29	47.6571	5.15709	0.000251766	0.00494659
	PAO_13059	PA4277.3		known	120.361	8.72451	1.13e-11	2.69e-09	156.77	9.27653	8.46e-19	2.72e-16	537.535	10.9066	2.2e-23	1.33e-20	108.126	8.90832	6.31e-11	1.01e-07
	PAO_16745	PA5149.1			4.25872	6.51999	7.84e-05	0.00140234	8.19853	7.44779	1.2e-06	4.38e-05	11.2835	7.83859	1.28e-07	5.97e-06	13.0848	8.45439	1.98e-05	0.00108043
	PAO_8985	PA3031.1			60.126	5.17967	1.68e-13	5.41e-11	96.0543	5.86274	9.51e-20	3.91e-17	234.143	7.02766	3.83e-21	1.47e-18	41.8977	4.96701	6.02e-08	2.47e-05
	PAO_2097	PA0729.1			145.371	4.04776	2.73e-08	2.22e-06	220.81	4.64449	2.87e-10	2.91e-08	683.978	6.20017	5.34e-17	1.39e-14	105.823	3.82418	2.11e-05	0.00112658
	PAO_15266	PA4746.1			566.222	3.22726	8.28e-07	4.06e-05	1845.25	5.01859	1.05e-18	3.24e-16	2462.1	5.30737	1.65e-16	3.68e-14	447.399	3.14246	1.03e-05	0.000675775
	PAO_9937	PA3262.1			172.378	2.94783	4.69e-05	0.000943415	264.894	3.60036	2.28e-10	2.34e-08	627.418	4.78526	5.94e-13	7.62e-11	118.129	2.59794	0.000595388	0.00924321
	PAO_13118	PA4280.3		nested	171.946	7.0794	2.72e-15	1.19e-12	193.774	7.18936	8.88e-20	3.87e-17	535.801	8.5607	5.92e-27	5.01e-24	48.956	5.51406	0.000144435	0.00358769
	PAO_14955	PA4690.3			156.534	6.85779	3.72e-19	2.51e-16	196.831	7.17464	9.33e-31	2.3e-27	536.769	8.51489	2.09e-38	4.42e-35	52.3676	5.49747	1.15e-05	0.000736714
	PAO_17729	PA5369.3			162.603	6.77631	4.82e-20	4.46e-17	195.76	7.00573	2.5e-24	2.32e-21	522.267	8.32598	3.22e-33	4.54e-30	48.9684	5.25609	0.000271065	0.00519793
	PAO_5313	PA1796.3			52.6508	6.10718	2.12e-14	8.25e-12	106.043	7.10101	1.94e-21	1.31e-18	185.143	7.78514	2.85e-22	1.42e-19	28.9984	5.54107	2.51e-06	0.000267467
	PAO_11728	PA3824.1			507.699	4.91342	5.77e-11	1.16e-08	1393.41	6.37629	5.35e-19	1.8e-16	3484.94	7.57531	8.73e-29	8.2e-26	414.849	4.92069	0.000176218	0.00402784
	PAO_14838	PA4669.1			69.0132	4.66828	2.28e-08	1.99e-06	107.737	5.30043	7.45e-20	3.45e-17	407.219	7.12575	2.2e-24	1.43e-21	67.3109	4.89634	0.000394997	0.00686541
	PAO_5310	PA1796.1			17.3811	3.95617	3.42e-05	0.000750134	36.4932	4.98463	8.08e-11	9.21e-09	96.6823	6.31836	8.97e-16	1.81e-13	31.9957	5.05793	4.54e-07	8.38e-05
	PAO_14303	PA4541.1			20.3603	3.57362	2.52e-06	9.66e-05	58.5485	5.1279	1.42e-15	2.83e-13	123.175	6.12045	3.52e-17	9.93e-15	24.2624	4.0875	2.84e-05	0.00127372
	PAO_8334	PA2819.3			108.349	2.18695	9.27e-05	0.00159257	203.234	3.21012	1.13e-08	7.86e-07	445.847	4.2995	3.4e-13	4.64e-11	180.351	3.27845	8.28e-06	0.000581163
	PAO_18150	Pseudomon-1	sRNA	anti nested	223.727	7.67621	3.65e-19	2.51e-16	202.891	7.48541	4.4e-25	5.43e-22	635.679	9.05539	4.85e-25	3.73e-22	62.8215	6.08083	5.64e-05	0.00189013
	PAO_14912	PA4690.2	rRNA	nested	5033.39	6.58854	2.01e-23	2.97e-20	2969.11	5.79017	2.25e-22	1.85e-19	6880.53	6.87767	1.38e-22	7.78e-20	972.143	4.50636	0.000622215	0.00953003
	PAO_17696	PA5369.2			24.8453	5.84832	1.93e-07	1.21e-05	9.90453	4.37582	0.000776241	0.00709829	55.8328	6.93705	2.85e-13	4.01e-11	55.5365	7.38614	3.91e-07	7.82e-05
	PAO_13124	PA4280.5			1107.74	5.65022	4.67e-14	1.65e-11	663.637	4.88695	4.68e-13	7.71e-11	1197.15	5.59209	5.85e-13	7.61e-11	168.609	3.17638	0.000469134	0.00786373
	PAO_14961	PA4690.5			1081.85	5.6102	3.26e-14	1.21e-11	678.844	4.91462	3.99e-14	7.57e-12	1151.29	5.53928	8.53e-14	1.29e-11	181.589	3.23587	0.000480979	0.0079786
	PAO_13122	PA4280.5			1282.91	5.44489	7.31e-10	1.08e-07	1582.6	5.74641	5.44e-18	1.39e-15	1741.24	5.70758	1.3e-16	3.15e-14	1348.69	6.01485	1.94e-07	5.18e-05
	PAO_14959	PA4690.5			1280.58	5.36448	2.43e-09	2.86e-07	1587.7	5.67286	5.27e-18	1.39e-15	1734.64	5.62716	5.43e-17	1.39e-14	1379.99	5.95733	6.49e-07	0.000111203
	PAO_17733	PA5369.5			1265.59	5.35367	1.45e-09	1.88e-07	1553.79	5.64622	1.64e-18	4.87e-16	1699.24	5.60495	1.82e-17	5.31e-15	1389.07	5.96223	2.4e-07	5.97e-05
	PAO_1976	PA0668.1			1904.89	5.15883	1.35e-08	1.28e-06	3054.19	5.84614	1.23e-17	2.95e-15	3540.82	5.88041	1.42e-16	3.25e-14	3625.36	6.61464	6.71e-08	2.47e-05
	PAO_13084	PA4280.2			49.2822	3.93412	2.72e-05	0.000634146	33.1924	3.29765	0.00020019	0.00258329	100.553	4.82716	6.26e-09	3.76e-07	68.03	4.95646	3.83e-05	0.00149206
	PAO_14921	PA4690.2			51.8966	3.84455	7.35e-07	3.73e-05	28.3351	2.84436	0.000165434	0.00223608	86.8045	4.46616	1.95e-11	2.04e-09	76.9251	4.81094	1e-05	0.000675775
	PAO_6246	PA2137	protein coding		6.18416	7.04372	1e-05	0.000292669	9.36075	7.67806	1.98e-07	9.84e-06	28.1011	9.14371	6.21e-10	4.57e-08	5.23163	7.13075	0.000514127	0.00832677
	PAO_5440	ldcA			27.9927	3.63022	0.000433745	0.00498874	37.4869	4.11624	9.58e-09	6.89e-07	77.4611	5.06716	3.98e-13	5.35e-11	62.8076	5.25782	0.000108198	0.002964
	PAO_9524	himD		overlapped	37.7027	4.10247	7.75e-08	5.57e-06	16.1893	2.74011	0.000465584	0.00487087	251.038	6.76706	3.67e-22	1.63e-19	162.084	6.47592	7.24e-05	0.0022694
	PAO_10576	novel			578.564	9.07122	4.33e-35	1.07e-31	441.346	8.65774	4.02e-33	1.49e-29	1406.09	10.2024	5.76e-38	9.74e-35	159.77	7.47165	1.5e-07	4.27e-05
	PAO_7207				74.8588	7.15482	1.1e-10	2e-08	102.861	7.53049	4.7e-17	1.05e-14	289.588	8.98148	9.34e-15	1.58e-12	47.7771	6.77708	3.14e-05	0.00135819
	PAO_8219				8.4088	5.85692	1.31e-05	0.000356717	31.0272	7.69298	7.47e-10	6.83e-08	81.8957	8.98039	2.19e-13	3.14e-11	19.913	7.31621	6.03e-05	0.00199812
	PAO_16316				36.9743	5.29827	9.07e-11	1.72e-08	21.3246	4.46979	6.4e-07	2.63e-05	110.755	6.77473	3.93e-17	1.07e-14	107.394	7.19393	1.3e-05	0.000806226
	PAO_17758				46.4197	4.62272	9.41e-08	6.39e-06	31.1117	3.99827	2.3e-07	1.13e-05	79.3843	5.28485	2.37e-15	4.27e-13	117.927	6.30154	1.52e-05	0.000891066
	PAO_14309				33.329	4.36874	7.93e-09	7.94e-07	51.8496	5.02885	1.98e-10	2.09e-08	141.679	6.40201	9.83e-15	1.63e-12	194.79	7.20922	4.79e-05	0.00166371
