# Supplementary material for: Interspecies RNA Interactome of Pathogen and Host in a Heritable Defensive Strategy
Source: Front Microbiol. 2021 Jul 21;12:649858. doi: 10.3389/fmicb.2021.649858 (PMC8334366; doi:10.3389/fmicb.2021.649858)
Supplement: Supplementary Table 3 — Constitutively expressed sRNAs from P. aeruginosa PAO1. Genes whose expression does not change in intestinal conditions compared to naïve bacteria. [file Table_3.xlsx]

## Sheet: Table S3
Table S3. Constitutively expressed sRNAs from P. aeruginosa PAO1.
Own name (TP)	Name	Biotype	Genomic Context
PAO_13481	iciA	protein coding	anti nested
PAO_4017	PA1352
PAO_4089	PA1402
PAO_5585	modC
PAO_6120	fusA2
PAO_7305	PA2556
PAO_7374	PA2572
PAO_8690	pilZ
PAO_9364	wbpM
PAO_10307	lecB		nested
PAO_10509	PA3459
PAO_11336	PA3723
PAO_12312	PA4023
PAO_12637	PA4180
PAO_14122	PA4498
PAO_14190	PA4515
PAO_16915	PA5187
PAO_1694	PA0616
PAO_17225	PA5249
PAO_1778	PA0630
PAO_18130	dsbA
PAO_2289	PA0788
PAO_2356	PA0813
PAO_405	PA0164
PAO_6403	PA2160
PAO_7116	PA2483
PAO_7469	PA2590
PAO_858	PA0366
PAO_14175	PA4507		overlapped
PAO_3830	PA1255
PAO_3623	novel
PAO_663
PAO_6819
