# Supplementary material for: Interspecies RNA Interactome of Pathogen and Host in a Heritable Defensive Strategy
Source: Front Microbiol. 2021 Jul 21;12:649858. doi: 10.3389/fmicb.2021.649858 (PMC8334366; doi:10.3389/fmicb.2021.649858)
Supplement: Supplementary Table 4 — All transcripts expressed in intestinal conditions with their lengths. Lists of all genes expressed in any of the F1, F2, F5, and F6 generations of C. elegans and further subdivisions as induced and microRNA-sized. [file Table_4.xlsx]

## Sheet: Table S4
Table S4. Expressed transcripts in intestinal conditions
Expressed transcripts of any size				Expressed transcripts microRNA-sized				Induced sRNAs of any size				microRNA-sized induced sRNAs
transcript own ID	annotation	length		transcript ID	annotation	length		transcript ID	annotation	length		transcript ID	length
PAO_13056	Nested PA4277.2	17		PAO_13056	Nested PA4277.2	17		PAO_13118	Nested PA4280.3	23		PAO_13118	23
PAO_14914	Nested PA4690.2	17		PAO_14914	Nested PA4690.2	17		PAO_14838	3' overlap PA4669.1	23		PAO_14838	23
PAO_17689	Nested PA5369.2	18		PAO_17689	Nested PA5369.2	18		PAO_14955	Nested PA4690.3	23		PAO_14955	23
PAO_14944	Nested PA4690.2	19		PAO_14944	Nested PA4690.2	19		PAO_17729	Nested PA5369.3	23		PAO_17729	23
PAO_1990	Nested PA0668.4	19		PAO_1990	Nested PA0668.4	19		PAO_1980	Anti_overlap tRNA	23		PAO_1980	23
PAO_13100	Nested PA4280.2	20		PAO_13100	Nested PA4280.2	20		PAO_10341	Nested amiL	25		PAO_10341	25
PAO_17718	Nested PA5369.2	20		PAO_17718	Nested PA5369.2	20		PAO_2678	Anti_overlap tRNA	29
PAO_13108	Nested PA4280.2	20		PAO_13108	Nested PA4280.2	20		PAO_14309	novel	30
PAO_14936	Nested PA4690.2	21		PAO_14936	Nested PA4690.2	21		PAO_5310	3' overlap PA1796.1	31
PAO_1999	Nested PA0668.4	21		PAO_1999	Nested PA0668.4	21		PAO_1343	Nested rsmY	37
PAO_13120	Nested PA4280.4	22		PAO_13120	Nested PA4280.4	22		PAO_13124	Nested PA4280.5	37
PAO_17731	Nested PA5369.4	22		PAO_17731	Nested PA5369.4	22		PAO_14303	Nested PA4541.1	37
PAO_14957	Nested PA4690.4	22		PAO_14957	Nested PA4690.4	22		PAO_16316	novel	37
PAO_1978	Nested PA0668.2	22		PAO_1978	Nested PA0668.2	22		PAO_14959	Nested PA4690.5	38
PAO_2008	Nested PA0668.4	22		PAO_2008	Nested PA0668.4	22		PAO_14961	Nested PA4690.5	38
PAO_2386	Antinested ssrA	23		PAO_2386	Antinested ssrA	23		PAO_8334	Nested PA2819.3	38
PAO_13118	Nested PA4280.3	23		PAO_13118	Nested PA4280.3	23		PAO_13122	Nested PA4280.5	39
PAO_14925	Nested PA4690.2	23		PAO_14925	Nested PA4690.2	23		PAO_17733	Nested PA5369.5	39
PAO_17700	Nested PA5369.2	23		PAO_17700	Nested PA5369.2	23		PAO_1976	Nested PA0668.1	39
PAO_13088	Nested PA4280.2	23		PAO_13088	Nested PA4280.2	23		PAO_5313	3' overlap PA1796.3	41
PAO_14304	Nested PA4541.1	23		PAO_14304	Nested PA4541.1	23		PAO_15147	Anti_nested crcZ	42
PAO_17729	Nested PA5369.3	23		PAO_17729	Nested PA5369.3	23		PAO_5440	Nested ldcA	46
PAO_14955	Nested PA4690.3	23		PAO_14955	Nested PA4690.3	23		PAO_11728	3' overlap PA3824.1	48
PAO_1980	Anti_overlap tRNA	23		PAO_1980	Anti_overlap tRNA	23		PAO_14912	Nested PA4690.2	48
PAO_14838	3' overlap PA4669.1	23		PAO_14838	3' overlap PA4669.1	23		PAO_15146	Nested crcZ	49
PAO_17710	Nested PA5369.2	23		PAO_17710	Nested PA5369.2	23		PAO_10576	novel	50
PAO_2018	Nested PA0668.4	23		PAO_2018	Nested PA0668.4	23		PAO_17758	novel	57
PAO_14926	Nested PA4690.2	24		PAO_14926	Nested PA4690.2	24		PAO_13084	Nested PA4280.2	59
PAO_2007	Nested PA0668.4	24		PAO_2007	Nested PA0668.4	24		PAO_15144	Nested crcZ	60
PAO_17708	Nested PA5369.2	25		PAO_17708	Nested PA5369.2	25		PAO_17696	Nested PA5369.2	60
PAO_13097	Nested PA4280.2	25		PAO_13097	Nested PA4280.2	25		PAO_8684	3' overlap rgsA	61
PAO_14306	Nested PA4541.2	25		PAO_14306	Nested PA4541.2	25		PAO_15143	Nested crcZ	62
PAO_13089	Nested PA4280.2	25		PAO_13089	Nested PA4280.2	25		PAO_8219	novel	64
PAO_17701	Nested PA5369.2	25		PAO_17701	Nested PA5369.2	25		PAO_6246	Nested PA2137	70
PAO_8176	3' overlap PA2775.1	27		PAO_8176	3' overlap PA2775.1	27		PAO_7207	novel	73
PAO_3217	Nested PA1053	27		PAO_3217	Nested PA1053	27		PAO_15266	5' overlap PA4746.1	76
PAO_14933	Nested PA4690.2	27		PAO_14933	Nested PA4690.2	27		PAO_18150	Antisense nested Pseudomon-1	76
PAO_15832	Nested PA4937.1	27		PAO_15832	Nested PA4937.1	27		PAO_2097	_includingPA0729.1	76
PAO_14948	Nested PA4690.2	28		PAO_14948	Nested PA4690.2	28		PAO_9524	5' overlap himD	76
PAO_13111	Nested PA4280.2	28		PAO_13111	Nested PA4280.2	28		PAO_9937	PA3262.1	78
PAO_17722	Nested PA5369.2	28		PAO_17722	Nested PA5369.2	28		PAO_16745	3' overlap PA5149.1	83
PAO_1987	Nested PA0668.4	28		PAO_1987	Nested PA0668.4	28		PAO_8985	PA3031.1	84
PAO_13748	Antinested rnpB	29
PAO_2678	Antioverlap tRNA	29
PAO_17740	Nested PA5369.5	29
PAO_17715	Nested PA5369.2	29
PAO_13105	Nested PA4280.2	29
PAO_13208	novel	30
PAO_17757	novel	30
PAO_14309	novel	30
PAO_14943	Nested PA4690.2	30
PAO_13129	Nested PA4280.5	30
PAO_1991	Nested PA0668.4	30
PAO_14966	Nested PA4690.5	30
PAO_1970	Nested PA0668.1	30
PAO_14941	Nested PA4690.2	30
PAO_1993	Nested PA0668.4	30
PAO_3681	Nested oprH	31
PAO_13107	Nested PA4280.2	31
PAO_17717	Nested PA5369.2	31
PAO_5310	3' overlap PA1796.1	31
PAO_14307	Nested PA4541.3	31
PAO_17753	Nested PA5369.5	31
PAO_1956	Nested PA0668.1	31
PAO_13131	Nested PA4280.5	31
PAO_2001	Nested PA0668.4	32
PAO_14858	3' overlap PA4673.1	32
PAO_13135	Nested PA4280.5	32
PAO_14973	Nested PA4690.5	32
PAO_17746	Nested PA5369.5	32
PAO_1963	Nested PA0668.1	32
PAO_1968	Nested PA0668.1	32
PAO_10575	5' overlap rhlI	33
PAO_7495	5' overlap PA2603.1	34
PAO_8412	Nested PA2852.1	34
PAO_13073	novel	34
PAO_17685	novel	34
PAO_14911	novel	34
PAO_2021	novel	34
PAO_14984	novel	35
PAO_1952	novel	35
PAO_1972	Nested PA0668.1	35
PAO_14940	Nested PA4690.2	35
PAO_13104	Nested PA4280.2	35
PAO_17714	Nested PA5369.2	35
PAO_1994	Nested PA0668.4	35
PAO_14969	Nested PA4690.5	36
PAO_17743	Nested PA5369.5	36
PAO_8712	Nested acpP	37
PAO_6823	novel	37
PAO_13145	novel	37
PAO_3221	novel	37
PAO_3686	3' overlap oprH	37
PAO_4048	novel	37
PAO_1343	Nested rsmY	37
PAO_14303	Nested PA4541.1	37
PAO_16316	novel	37
PAO_5312	5' overlap PA1796.3	37
PAO_17735	Nested PA5369.5	37
PAO_13124	Nested PA4280.5	37
PAO_17730	5' overlap PA5369.3	37
PAO_14956	5' overlap PA4690.3	37
PAO_13119	5' overlap PA4280.3	37
PAO_1979	Antioverlap tRNA	37
PAO_17742	Nested PA5369.5	37
PAO_16391	Antinested ponA	37
PAO_453	Nested PA0178	37
PAO_1561	novel	37
PAO_14980	Nested PA4690.5	37
PAO_17688	Nested PA5369.2	37
PAO_13076	Nested PA4280.2	37
PAO_17707	Nested PA5369.2	37
PAO_13096	Nested PA4280.2	37
PAO_14932	Nested PA4690.2	37
PAO_9940	5' overlap PA3262.2	37
PAO_9157	5' overlap PA3094.3	37
PAO_2002	Nested PA0668.4	37
PAO_14308	5' overlap PA4541.3	37
PAO_14930	Nested PA4690.2	37
PAO_13094	Nested PA4280.2	37
PAO_17705	Nested PA5369.2	37
PAO_13083	Nested PA4280.2	37
PAO_17695	Nested PA5369.2	37
PAO_14920	Nested PA4690.2	37
PAO_2003	Nested PA0668.4	37
PAO_2015	Nested PA0668.4	37
PAO_8334	Nested PA2819.3	38
PAO_14961	Nested PA4690.5	38
PAO_1974	Nested PA0668.1	38
PAO_14959	Nested PA4690.5	38
PAO_17716	Nested PA5369.2	38
PAO_11072	Nested opr86	38
PAO_17404	novel	38
PAO_12987	Nested rpoB	38
PAO_17128	novel	38
PAO_2833	novel	38
PAO_14620	5' overlap PA4610	38
PAO_5491	Nested PA1832	38
PAO_14916	Nested PA4690.2	38
PAO_17691	Nested PA5369.2	38
PAO_2012	Nested PA0668.4	38
PAO_474	novel	39
PAO_14837	Nested PA4669.1	39
PAO_13122	Nested PA4280.5	39
PAO_17733	Nested PA5369.5	39
PAO_13106	Nested PA4280.2	39
PAO_14968	Nested PA4690.5	39
PAO_7340	Nested PA2567	39
PAO_1976	Nested PA0668.1	39
PAO_14909	Nested PA4690.1	39
PAO_17682	Nested PA5369.1	39
PAO_13070	Nested PA4280.1	39
PAO_13079	Nested PA4280.2	39
PAO_17712	Nested PA5369.2	39
PAO_14938	Nested PA4690.2	39
PAO_2024	3' overlap PA0668.5	39
PAO_1996	Nested PA0668.4	39
PAO_2016	Nested PA0668.4	39
PAO_2017	Nested PA0668.4	39
PAO_3680	Nested oprH	40
PAO_10473	novel	40
PAO_4577	Nested ccoP2	40
PAO_8415	Anti_overlap P14	40
PAO_13102	Nested PA4280.2	40
PAO_17690	Nested PA5369.2	40
PAO_14915	Nested PA4690.2	40
PAO_13080	Nested PA4280.2	40
PAO_17692	Nested PA5369.2	40
PAO_14917	Nested PA4690.2	40
PAO_18088	novel	41
PAO_5313	3' overlap PA1796.3	41
PAO_3135	Anti_overlap tRNA	41
PAO_338	Nested PA0132	41
PAO_1950	Nested tyrZ	41
PAO_12201	Nested lis	41
PAO_1992	Nested PA0668.4	41
PAO_17750	Nested PA5369.5	42
PAO_15147	Antinested crcZ	42
PAO_15924	Nested PA4948	42
PAO_10153	Nested PA3327	42
PAO_13139	Nested PA4280.5	42
PAO_1959	Nested PA0668.1	42
PAO_13082	Nested PA4280.2	42
PAO_4461	Nested ffs	43
PAO_15362	5' overlap P31	43
PAO_7494	Nested PA2603.1	43
PAO_14977	Nested PA4690.5	43
PAO_13071	5' overlap PA4280.1	43
PAO_8413	3' overlap PA2852.1	43
PAO_1971	Nested PA0668.1	43
PAO_15217	5' overlap rpsO	44
PAO_17683	5' overlap PA5369.1	44
PAO_2023	5' overlap PA0668.5	44
PAO_14965	Nested PA4690.5	44
PAO_13128	Nested PA4280.5	44
PAO_17739	Nested PA5369.5	44
PAO_457	5' overlap PA0179	44
PAO_436	Nested PA0178	44
PAO_14510	novel	44
PAO_13078	Nested PA4280.2	44
PAO_17694	Nested PA5369.2	44
PAO_14919	Nested PA4690.2	44
PAO_2013	Nested PA0668.4	44
PAO_13112	Nested PA4280.2	44
PAO_14949	Nested PA4690.2	44
PAO_1986	Nested PA0668.4	44
PAO_14939	Nested PA4690.2	44
PAO_13103	Nested PA4280.2	44
PAO_17713	Nested PA5369.2	44
PAO_1995	Nested PA0668.4	44
PAO_14910	5' overlap PA4690.1	44
PAO_17723	Nested PA5369.2	45
PAO_14857	5' overlap PA4673.1	46
PAO_13125	Nested PA4280.5	46
PAO_5440	Nested ldcA	46
PAO_14942	Nested PA4690.2	46
PAO_14759	novel	46
PAO_15744	Nested PA4917	46
PAO_13144	novel	46
PAO_17702	Nested PA5369.2	46
PAO_13090	Nested PA4280.2	46
PAO_14927	Nested PA4690.2	46
PAO_2006	Nested PA0668.4	46
PAO_17736	Nested PA5369.5	46
PAO_14962	Nested PA4690.5	46
PAO_1973	Nested PA0668.1	46
PAO_14974	Nested PA4690.5	46
PAO_17747	Nested PA5369.5	46
PAO_1967	Nested PA0668.1	46
PAO_14951	5' overlap PA4690.2	46
PAO_13114	5' overlap PA4280.2	46
PAO_13956	5' overlap ptsN	47
PAO_17728	novel	47
PAO_15777	Nested PA4929	47
PAO_13990	3' overlap PA4474	47
PAO_4130	5' overlap PA1429	47
PAO_6877	novel	47
PAO_1981	novel	47
PAO_13136	Nested PA4280.5	47
PAO_1962	Nested PA0668.1	47
PAO_13132	Nested PA4280.5	47
PAO_14466	novel	48
PAO_14954	novel	48
PAO_11728	3' overlap PA3824.1	48
PAO_17968	novel	48
PAO_919	Antinested PA0383	48
PAO_17686	Nested PA5369.2	48
PAO_14912	Nested PA4690.2	48
PAO_13074	Nested PA4280.2	48
PAO_2020	Nested PA0668.4	48
PAO_13117	novel	49
PAO_15146	Nested crcZ	49
PAO_14282	5' overlap PA4535	49
PAO_17709	Nested PA5369.2	49
PAO_6308	5' overlap PA2146	50
PAO_10576	novel	50
PAO_6231	novel	50
PAO_4174	5' overlap rsaL	50
PAO_11152	novel	50
PAO_14983	novel	50
PAO_17756	novel	50
PAO_10060	Nested phrS	50
PAO_14934	Nested PA4690.2	50
PAO_13098	Nested PA4280.2	50
PAO_2000	Nested PA0668.4	50
PAO_17725	5' overlap PA5369.2	50
PAO_1985	Nested PA0668.4	50
PAO_1984	5' overlap PA0668.4	50
PAO_5479	Nested PA1831	51
PAO_15149	Nested crcZ	51
PAO_11374	novel	51
PAO_12261	5' overlap PA4012	51
PAO_17084	Nested ssrS	51
PAO_14981	5' overlap PA4690.5	51
PAO_13113	Nested PA4280.2	51
PAO_17724	Nested PA5369.2	51
PAO_14950	Nested PA4690.2	51
PAO_5178	Nested PA1768	52
PAO_11530	5' overlap PA3786	52
PAO_10075	novel	52
PAO_14976	Nested PA4690.5	52
PAO_17749	Nested PA5369.5	52
PAO_13138	Nested PA4280.5	52
PAO_17754	5' overlap PA5369.5	52
PAO_1955	5' overlap PA0668.1	52
PAO_10255	Nested PA3349	53
PAO_16224	novel	53
PAO_8177	5' overlap PA2775.1	53
PAO_1960	Nested PA0668.1	53
PAO_13110	Nested PA4280.2	53
PAO_14947	Nested PA4690.2	53
PAO_17721	Nested PA5369.2	53
PAO_13352	5' overlap mvaT	54
PAO_1988	Nested PA0668.4	54
PAO_7360	5' overlap PA2570.1	55
PAO_755	Nested ygdP	55
PAO_15200	Nested PA4738	56
PAO_12064	Antinested P24	56
PAO_14913	Nested PA4690.2	56
PAO_2019	Nested PA0668.4	56
PAO_13133	Nested PA4280.5	56
PAO_17744	Nested PA5369.5	56
PAO_14970	Nested PA4690.5	56
PAO_1966	Nested PA0668.1	56
PAO_17758	novel	57
PAO_8762	5' overlap rne	57
PAO_7729	3' overlap nuoB	57
PAO_12204	Nested lipB	57
PAO_1953	novel	57
PAO_17720	Nested PA5369.2	57
PAO_13109	Nested PA4280.2	57
PAO_14946	Nested PA4690.2	57
PAO_15202	Nested PA4739	58
PAO_2074	novel	58
PAO_3687	5' overlap phoP	58
PAO_2071	novel	58
PAO_10601	novel	58
PAO_18256	Nested PA5526	58
PAO_5597	novel	58
PAO_14923	Nested PA4690.2	58
PAO_17698	Nested PA5369.2	58
PAO_2010	Nested PA0668.4	58
PAO_14967	Nested PA4690.5	58
PAO_1969	Nested PA0668.1	58
PAO_1989	Nested PA0668.4	58
PAO_14921	Nested PA4690.2	59
PAO_13084	Nested PA4280.2	59
PAO_2679	Anti_overlap tRNA	59
PAO_15578	Nested PA4843	59
PAO_8343	5' overlap PA2821	59
PAO_4156	5' overlap lasR	59
PAO_9853	Nested minD	59
PAO_13086	Nested PA4280.2	59
PAO_17741	Nested PA5369.5	59
PAO_17696	Nested PA5369.2	60
PAO_15144	Nested crcZ	60
PAO_13747	Antinested rnpB	60
PAO_339	5' overlap PA0132	60
PAO_11886	Nested PA3880	60
PAO_3390	Nested fliC	60
PAO_3052	Nested pqsB	60
PAO_2011	Nested PA0668.4	60
PAO_15199	Nested PA4738	61
PAO_8684	3' overlap rgsA	61
PAO_5387	Anti_overlap tRNA	61
PAO_18151	Nested Pseudomon-1	62
PAO_1306	novel	62
PAO_15143	Nested crcZ	62
PAO_17786	3' overlap betI	62
PAO_4916	novel	62
PAO_13130	Nested PA4280.5	62
PAO_8092	novel	63
PAO_13949	Nested rpoN	63
PAO_7368	5' overlap PA2572	63
PAO_13740	Nested PA4420	63
PAO_12345	novel	63
PAO_17704	Nested PA5369.2	63
PAO_13092	Nested PA4280.2	63
PAO_2004	Nested PA0668.4	63
PAO_8219	novel	64
PAO_7137	Nested PA2491	64
PAO_18086	Antinested PA5480	64
PAO_14929	Nested PA4690.2	64
PAO_2385	Nested ssrA	65
PAO_2196	Nested algU	65
PAO_10726	5' overlap arnB	66
PAO_12556	Nested PA4131	66
PAO_14242	novel	66
PAO_1998	Nested PA0668.4	66
PAO_7620	novel	67
PAO_14101	5' overlap roxS	67
PAO_17711	Nested PA5369.2	67
PAO_14937	Nested PA4690.2	67
PAO_2384	Nested ssrA	67
PAO_2026	novel	68
PAO_11950	novel	68
PAO_1342	Nested rsmY	68
PAO_13101	Nested PA4280.2	68
PAO_15130	5' overlap cbrB	69
PAO_5348	5' overlap clpX	69
PAO_2754	5' overlap PA0922.1	69
PAO_13266	5' overlap flp	70
PAO_11944	Nested PA3919	70
PAO_6888	Nested PA2367	70
PAO_8145	novel	70
PAO_16685	3' overlap ntrC	71
PAO_1151	novel	71
PAO_12192	novel	71
PAO_14239	Nested PA4523	71
PAO_1965	Nested PA0668.1	71
PAO_10457	novel	72
PAO_14971	Nested PA4690.5	72
PAO_13134	Nested PA4280.5	72
PAO_17745	Nested PA5369.5	72
PAO_7207	novel	73
PAO_7794	Nested nuoL	73
PAO_9278	novel	73
PAO_8108	novel	74
PAO_16667	3' overlap glnA	75
PAO_12914	5' overlap tufA	75
PAO_6199	novel	75
PAO_2387	5' overlap ssrA	75
PAO_3214	5' overlap PA1053	76
PAO_18150	Antinested Pseudomon-1	76
PAO_9524	5' overlap himD	76
PAO_3676	5' overlap oprH	76
PAO_2097	_includingPA0729.1	76
PAO_1	5' overlap dnaA	76
PAO_16226	Nested PA5017	76
PAO_458	novel	76
PAO_10002	5' overlap PA3278	76
PAO_15213	novel	76
PAO_8499	3' overlap PA2883	76
PAO_8891	5' overlap psrA	76
PAO_10364	novel	76
PAO_13751	Antioverlap RNaseP_bact_a	76
PAO_15266	5' overlap PA4746.1	76
PAO_14247	5' overlap PA4524.1	76
PAO_15938	5' overlap orn	77
PAO_5384	Nested hupB	77
PAO_16768	_includingPA5160.1	77
PAO_9327	_includingPA3133.2	77
PAO_15474	Anti_overlap PA4797	78
PAO_5314	_includingPA1796.4	78
PAO_8714	5' overlap acpP	78
PAO_9937	_includingPA3262.1	78
PAO_9154	_includingPA3094.2	78
PAO_9153	_includingPA3094.1	78
PAO_5311	_including Antisense tRNA	78
PAO_10061	5' overlap phrS	78
PAO_5971	novel	78
PAO_9353	_includingPA3139.1	78
PAO_16343	5' overlap aroK	79
PAO_14958	5' overlap PA4690.4	79
PAO_17732	5' overlap PA5369.4	79
PAO_13121	5' overlap PA4280.4	79
PAO_1977	5' overlap PA0668.2	79
PAO_4034	Anti_overlap PA1362	80
PAO_13040	_includingPA4276.1	80
PAO_7430	_includingPA2581.1	80
PAO_8775	Nested rne	80
PAO_15203	5' overlap PA4739	81
PAO_542	_includingPA0263.1	82
PAO_9332	_includingPA3133.4	82
PAO_10346	_includingPA3368.1	83
PAO_8985	_includingPA3031.1	84
PAO_17699	Nested PA5369.2	84
PAO_13087	Nested PA4280.2	84
PAO_14924	Nested PA4690.2	84
PAO_2009	Nested PA0668.4	84
PAO_10929	Antinested PrrB_RsmZ	85
PAO_13142	5' overlap PA4280.5	87
PAO_9664	5' overlap PA3190	88
PAO_15267	_includingPA4746.2	88
PAO_13059	5' overlap PA4277.3	91
PAO_17296	5' overlap algR	92
