# Supplementary material for: Interspecies RNA Interactome of Pathogen and Host in a Heritable Defensive Strategy
Source: Front Microbiol. 2021 Jul 21;12:649858. doi: 10.3389/fmicb.2021.649858 (PMC8334366; doi:10.3389/fmicb.2021.649858)
Supplement: Supplementary Table 5 — Transcripts constitutively expressed with their lengths. [file Table_5.xlsx]

## Sheet: Table S5
Table S5. Constititively expressed sRNAs and their lengths
Own_id	Genomic Context	Biotype	Related annotation	Lenght
PAO_663	novel	0	0	21
PAO_2289	nested	protein_coding	PA0788	26
PAO_14190	nested	protein_coding	PA4515	30
PAO_1694	nested	protein_coding	PA0616	30
PAO_6819	novel	0	0	31
PAO_17225	nested	protein_coding	PA5249	32
PAO_10307	nested	protein_coding	lecB	35
PAO_12312	nested	protein_coding	PA4023	37
PAO_7305	anti_nested	protein_coding	PA2556	37
PAO_405	nested	protein_coding	PA0164	40
PAO_4089	anti_nested	protein_coding	PA1402	40
PAO_858	nested	protein_coding	PA0366	40
PAO_12637	nested	protein_coding	PA4180	41
PAO_6120	anti_nested	protein_coding	fusA2	41
PAO_7374	anti_nested	protein_coding	PA2572	42
PAO_1778	nested	protein_coding	PA0630	45
PAO_3830	overlapped	protein_coding	PA1255	46
PAO_3623	novel	0	0	47
PAO_10509	nested	protein_coding	PA3459	48
PAO_13481	anti_nested	protein_coding	iciA	48
PAO_2356	nested	protein_coding	PA0813	49
PAO_7469	nested	protein_coding	PA2590	49
PAO_14122	nested	protein_coding	PA4498	50
PAO_6403	nested	protein_coding	PA2160	55
PAO_4017	anti_nested	protein_coding	PA1352	57
PAO_5585	anti_nested	protein_coding	modC	60
PAO_11336	nested	protein_coding	PA3723	61
PAO_18130	nested	protein_coding	dsbA	62
PAO_8690	anti_nested	protein_coding	pilZ	64
PAO_14175	overlapped	protein_coding	PA4507	65
PAO_9364	anti_nested	protein_coding	wbpM	67
PAO_7116	nested	protein_coding	PA2483	72
PAO_16915	nested	protein_coding	PA5187	74
