# Supplementary material for: Interspecies RNA Interactome of Pathogen and Host in a Heritable Defensive Strategy
Source: Front Microbiol. 2021 Jul 21;12:649858. doi: 10.3389/fmicb.2021.649858 (PMC8334366; doi:10.3389/fmicb.2021.649858)
Supplement: Supplementary Table 6 — Caenorhabditis elegans mRNA putative targets of microRNA-sized-induced sRNAs from P. aeruginosa PAO1. [file Table_6.xlsx]

## Sheet: Table S6
Table S6. List of mRNA putative targets of the 5 microRNA-sized induced sRNAs.
WBGene00044811	F12E12.11
WBGene00044294	C01B10.11
WBGene00044109	K02E11.10
WBGene00022809	ZK697.14
WBGene00022350	Y82E9BR.18
WBGene00021835	Y54E10A.17
WBGene00021818	Y53G8B.2
WBGene00021741	Y50D4B.2
WBGene00021709	ugt-29
WBGene00021686	nsun-2
WBGene00021011	W03G1.5
WBGene00020112	pfd-5
WBGene00019830	hrg-1
WBGene00019652	cest-34
WBGene00019593	K09F6.10
WBGene00019525	K08D9.4
WBGene00019433	acdh-3
WBGene00019163	ubxn-6
WBGene00019100	F59B1.8
WBGene00019060	acox-3
WBGene00019001	ipgm-1
WBGene00018958	cest-27
WBGene00018811	pmt-2
WBGene00018787	cutl-20
WBGene00018750	F53C3.6
WBGene00018702	F52E4.5
WBGene00018430	nhr-142
WBGene00018413	cyp-33C4
WBGene00018271	ctsa-1.1
WBGene00017898	F28C10.3
WBGene00017881	asp-13
WBGene00017874	acdh-9
WBGene00017681	slc-17.5
WBGene00017510	nhr-178
WBGene00017487	F15E6.6
WBGene00017422	F13C5.1
WBGene00017349	farl-11
WBGene00017283	F09E5.3
WBGene00017082	DC2.5
WBGene00017060	D2063.1
WBGene00016992	zhit-1
WBGene00016762	ugt-24
WBGene00016630	acer-1
WBGene00016210	C29F5.1
WBGene00015887	C17C3.1
WBGene00015788	C15B12.8
WBGene00015693	ugt-28
WBGene00015567	bath-44
WBGene00015538	sams-3
WBGene00015512	mthf-1
WBGene00015286	best-3
WBGene00015162	algn-11
WBGene00014801	K08E5.1
WBGene00014254	cyp-13A10
WBGene00014136	ZK896.5
WBGene00014092	ZK822.5
WBGene00014012	riok-3
WBGene00013878	atfs-1
WBGene00013515	Y73F4A.2
WBGene00013358	abhd-3.1
WBGene00013324	mrps-7
WBGene00013284	daf-22
WBGene00013077	ttr-24
WBGene00012908	Y46G5A.18
WBGene00012608	hphd-1
WBGene00012375	mecr-1
WBGene00011300	R107.5
WBGene00011232	pck-2
WBGene00011102	R07E3.1
WBGene00010988	metr-1
WBGene00010904	ugt-62
WBGene00010879	taap-1
WBGene00010790	sodh-1
WBGene00010627	nol-56
WBGene00010488	endu-1
WBGene00010469	K01D12.10
WBGene00010303	cri-3
WBGene00009992	F53F4.10
WBGene00009952	acaa-2
WBGene00009706	argk-1
WBGene00009334	F32D8.12
WBGene00009221	acs-2
WBGene00009187	F27D4.1
WBGene00008810	cyp-13A12
WBGene00008694	vwa-8
WBGene00008607	F09B12.3
WBGene00008594	clec-57
WBGene00008566	acox-1.3
WBGene00008514	mrpl-44
WBGene00008436	DH11.2
WBGene00008334	sdz-8
WBGene00008296	cdr-2
WBGene00007988	best-8
WBGene00007969	acs-19
WBGene00007927	C34C12.8
WBGene00007882	C33A12.3
WBGene00007848	cytb-5.1
WBGene00007824	dlat-2
WBGene00007811	C29F7.2
WBGene00007756	C27A7.5
WBGene00007605	hrg-7
WBGene00007586	ril-2
WBGene00007574	C14B1.3
WBGene00007564	mrps-22
WBGene00007177	oac-1
WBGene00007137	lcmt-1
WBGene00007129	B0272.3
WBGene00007048	nfx-1
WBGene00006890	vem-1
WBGene00006510	mtrr-1
WBGene00006473	tag-124
WBGene00006404	tag-10
WBGene00005655	srr-4
WBGene00005007	spr-2
WBGene00004995	spp-10
WBGene00004258	pyc-1
WBGene00004003	pgp-9
WBGene00003999	pgp-5
WBGene00003998	pgp-4
WBGene00003995	pgp-1
WBGene00003920	par-5
WBGene00003907	paf-2
WBGene00003844	odc-1
WBGene00003834	nxf-1
WBGene00003725	nhr-135
WBGene00003658	nhr-68
WBGene00003588	nex-1
WBGene00003408	mrp-2
WBGene00003214	mel-32
WBGene00003093	lys-4
WBGene00002258	lbp-6
WBGene00002153	iars-2
WBGene00002055	ifc-1
WBGene00002026	hsp-70
WBGene00001817	haf-7
WBGene00001755	gst-7
WBGene00001564	icl-1
WBGene00001262	emb-8
WBGene00001156	ech-7
WBGene00001154	ech-5
WBGene00000996	dif-1
WBGene00000981	dhs-18
WBGene00000977	dhs-14
WBGene00000970	dhs-6
WBGene00000822	csq-1
WBGene00000785	cpr-5
WBGene00000784	cpr-4
WBGene00000781	cpr-1
WBGene00000780	cpn-4
WBGene00000562	cng-1
WBGene00000379	cct-4
WBGene00000229	atp-2
WBGene00000224	atgp-1
WBGene00000212	asm-2
WBGene00000107	alh-1
