# Supplementary material for: Interspecies RNA Interactome of Pathogen and Host in a Heritable Defensive Strategy
Source: Front Microbiol. 2021 Jul 21;12:649858. doi: 10.3389/fmicb.2021.649858 (PMC8334366; doi:10.3389/fmicb.2021.649858)
Supplement: Supplementary Table 7 — List of C. elegans mRNA targets of P. aeruginosa miRNA-like sRNAs expressed intestinally in C. elegans. [file Table_7.xlsx]

## Sheet: Table S7
Table S7. C. elegans mRNA targets of P. aeruginosa miRNA-sized sRNAs expressed intestinally
Sequence ID	Query Start	Query End	Bacterial TP ID	Bacteria TP start	Bacteria TP end	overall interaction energy	Sequence	dot-bracket notation
C52E4.1.1	330	345	PAO_13056	1	17	-26.78	UUCGAUUCUCGUACCC&GGGUAGCGGGAAUCGAA	((((((((((((((((&)))).))))))))))))
F18E3.7a.1	591	605	PAO_13056	1	15	-24.84	CGAUACUUGCUACCC&GGGUAGCGGGAAUCG	((((.((((((((((&)))))))))).))))
F44C4.3.1	49	63	PAO_13056	1	16	-22.67	UCAUUCUUGCUGCCU&GGGUAGCGGGAAUCGA	(((((((((((((((&))))))))))))).))
K08E7.9.1	2611	2627	PAO_13056	1	16	-22.4	UUGAUUUCCGCUUCUCC&GGGUAGCGGGAAUCGA	((((((((((((.(.((&))).))))))))))))
K08D9.4a.1	76	88	PAO_13056	1	12	-22.35	UUCCACGCUACCC&GGGUAGCGGGAA	((((.((((((((&))))))))))))
M60.7.1	1187	1199	PAO_13056	2	14	-22.05	GACUCCCGCUGCC&GGUAGCGGGAAUC	((.((((((((((&)))))))))).))
F54A5.2b.1	158	167	PAO_13056	1	10	-21.41	CCUGCUGCCC&GGGUAGCGGG	((((((((((&))))))))))
M05D6.6.2	57	70	PAO_13056	1	14	-21.4	GGUUCUUGCUACUU&GGGUAGCGGGAAUC	((((((((((((((&))))))))))))))
F44A6.5.1	624	634	PAO_13056	1	11	-21.24	UCCUGCUGCCU&GGGUAGCGGGA	(((((((((((&)))))))))))
F57C12.4.1	1395	1410	PAO_13056	1	15	-21	UGAUUCUUGCUCUCCC&GGGUAGCGGGAAUCG	(((((((((((..(((&))).)))))))))))
F22E10.3.1	1316	1341	PAO_13056	1	17	-20.95	UUCGAAAAUGUUCACUUCCGUUACCC&GGGUAGCGGGAAUCGAA	(((((..........(((((((((((&))))))))))).)))))
F58F9.7.1	1024	1038	PAO_13056	1	16	-20.72	UCUAUUCCCGUACCU&GGGUAGCGGGAAUCGA	((.((((((((((((&)))).)))))))).))
R12E2.11.1	308	317	PAO_13056	1	10	-20.55	CUUGCUACCC&GGGUAGCGGG	((((((((((&))))))))))
K07A12.3.1	374	387	PAO_13056	1	14	-20.33	GAGACUCGCUGCCC&GGGUAGCGGGAAUC	((..((((((((((&))))))))))..))
C01G6.6a.1	294	308	PAO_13056	1	15	-20.1	CGAUUCCAACUAUUC&GGGUAGCGGGAAUCG	(((((((..((((((&))))))..)))))))
Y58A7A.5.1	873	887	PAO_13056	1	16	-20.06	UCGAUCUUGCUGCCU&GGGUAGCGGGAAUCGA	(((((((((((((((&)))))))))).)))))
F28A12.4.2	1279	1293	PAO_13056	1	15	-19.72	UGAUUUCUGCUAUUU&GGGUAGCGGGAAUCG	(((((((((((((((&)))))))))))))))
F10E7.8a.1	2966	2980	PAO_13056	1	17	-19.59	UUCGAUCCCGUUUCC&GGGUAGCGGGAAUCGAA	(((((((((((((((&))).))))))).)))))
C05E4.9a.2	3100	3114	PAO_13056	1	14	-19.44	GAUUUUCGUUGCACC&GGGUAGCGGGAAUC	((((((((((((.((&))))))))))))))
Y51A2D.9b.1	19	36	PAO_13056	1	16	-19.41	UCGAUUCCCGGUCGACUC&GGGUAGCGGGAAUCGA	((((((((((.(..((((&))))).))))))))))
C01A2.4.1	460	476	PAO_13056	1	16	-19.4	UCGAUUCUCGACGCACC&GGGUAGCGGGAAUCGA	((((((((((..((.((&))))..))))))))))
K02F2.2.1	725	739	PAO_13056	3	17	-19.29	UUCGGUUCCCGUGUC&GUAGCGGGAAUCGAA	((((((((((((..(&)..))))))))))))
ZK632.3.1	919	939	PAO_13056	1	15	-19.23	CGAUUUCCGCUUCAAAAAUCC&GGGUAGCGGGAAUCG	(((((((((((......((((&)))))))))))))))
R53.4.1	473	487	PAO_13056	1	15	-19.2	CGAUUUCGUCUACUC&GGGUAGCGGGAAUCG	(((((((..((((((&))))))..)))))))
R08F11.4.1	1158	1172	PAO_13056	1	15	-19.01	CGAUUUUCACUGCUU&GGGUAGCGGGAAUCG	((((((((.((((((&)))))).))))))))
C54G7.2.1	709	723	PAO_13056	1	15	-18.94	CGAUUGUCGUUACUC&GGGUAGCGGGAAUCG	(((((.(((((((((&))))))))).)))))
C10H11.4.1	491	504	PAO_13056	2	16	-18.91	UCGAGCCUGUUACC&GGUAGCGGGAAUCGA	((((.(((((((((&)))))))))..))))
Y50E8A.16.1	2686	2699	PAO_13056	1	13	-18.89	AUUUCUGCGUACCC&GGGUAGCGGGAAU	((((((((.(((((&)))))))))))))
C07D10.2a.1	1193	1202	PAO_13056	2	11	-18.81	UUCCGCUGCC&GGUAGCGGGA	((((((((((&))))))))))
F59A2.3.2	907	920	PAO_13056	1	14	-18.69	GUUUUCCGCAUCCC&GGGUAGCGGGAAUC	(.(((((((..(((&)))..))))))).)
Y53F4B.33.1	211	220	PAO_13056	1	10	-18.54	UCCGCUACCU&GGGUAGCGGG	((((((((((&))))))))))
F09F3.9.1	76	88	PAO_13056	2	15	-18.51	CGAUUCUCGUACC&GGUAGCGGGAAUCG	(((((((((((((&))).))))))))))
D2096.8.1	1119	1137	PAO_13056	1	16	-18.49	UCCAUAUUCCGCUUCUCCC&GGGUAGCGGGAAUCGA	((.((.(((((((...(((&))).))))))))).))
F54D7.7.1	198	214	PAO_13056	1	16	-18.47	UCGUCUCCUUGUUACCU&GGGUAGCGGGAAUCGA	(((..(((.((((((((&)))))))))))..)))
M117.2a.1	432	443	PAO_13056	2	14	-18.37	GAUCGCGCUGCC&GGUAGCGGGAAUC	((((.(((((((&))))))).).)))
F11C1.5a.2	5437	5455	PAO_13056	1	17	-18.33	UUUGUUUUAGCUGUUACCC&GGGUAGCGGGAAUCGAA	((((.(((..(((((((((&)))))))))))).))))
F54D8.3a.1	1540	1557	PAO_13056	1	16	-18.23	UUGAAUUUUCGCUUUCCC&GGGUAGCGGGAAUCGA	(((.(((((((((..(((&))).))))))))))))
C05D11.11a.1	621	632	PAO_13056	1	12	-18.16	UUCCUGCUACGC&GGGUAGCGGGAA	((((((((((.(&).))))))))))
F29G9.3.1	202	215	PAO_13056	1	13	-18.12	AUUUCUGCUGCGCC&GGGUAGCGGGAAU	(((((((((((.((&)))))))))))))
F15E6.7a.1	482	493	PAO_13056	1	11	-18.07	UCAUCGCUGCCC&GGGUAGCGGGA	((.(((((((((&)))))))))))
ZK896.5.1	358	373	PAO_13056	1	16	-17.95	UCAUUCACAGUUACCC&GGGUAGCGGGAAUCGA	((((((...(((((((&)))))))..)))).))
C34E10.6.1	44	61	PAO_13056	1	17	-17.88	UUCGGCUUCCCGUCUCCU&GGGUAGCGGGAAUCGAA	(((((.(((((((..(((&)))..))))))))))))
K11C4.4.1	1155	1167	PAO_13056	1	14	-17.75	GGUUCCUGCUUCC&GGGUAGCGGGAAUC	(((((((((((((&))).))))))))))
B0399.2.1	1754	1765	PAO_13056	1	10	-17.7	CCCGCUAUACCC&GGGUAGCGGG	(((((((..(((&))))))))))
W03G1.5.1	1227	1236	PAO_13056	1	11	-17.7	UCCCGUUCCC&GGGUAGCGGGA	((((((((((&))).)))))))
W02F12.2.1	773	789	PAO_13056	1	16	-17.64	UCGAUCUUCUCGUUCCC&GGGUAGCGGGAAUCGA	(((((..((((((((((&))).))))))))))))
C15H11.3.1	912	926	PAO_13056	1	16	-17.52	UCAUUCCCGCGAUGC&GGGUAGCGGGAAUCGA	((((((((((.((.(&).)).)))))))).))
F14H8.6b.1	1123	1138	PAO_13056	1	17	-17.49	UUCGAUUUCUCAACUC&GGGUAGCGGGAAUCGAA	(((((((((((.((((&)))).).))))))))))
B0285.4.1	211	223	PAO_13056	1	13	-17.47	GUUUCCGAAGCCC&GGGUAGCGGGAAU	(((((((..((((&))))..)))))))
F57B10.3a.1	1667	1678	PAO_13056	2	13	-17.45	GUUCUCGCUAUU&GGUAGCGGGAAU	((((((((((((&))))))))))))
C37A5.1.1	696	714	PAO_13056	1	15	-17.41	CGAUUCCUAUUGCUUACCC&GGGUAGCGGGAAUCG	((((((((...((.(((((&)))))))))))))))
F41B5.4.1	284	296	PAO_13056	1	15	-17.41	CGAUUCCGCUCCC&GGGUAGCGGGAAUCG	(((((((((((((&))).))).)))))))
K11D12.3a.1	479	489	PAO_13056	2	12	-17.33	UUCUCGUUACC&GGUAGCGGGAA	(((((((((((&)))))))))))
K11G9.1.1	1277	1293	PAO_13056	1	17	-17.31	UUCGAUUACUGCAAUCC&GGGUAGCGGGAAUCGAA	(((((((.((((.((((&)))).)))).)))))))
W08D2.4b.2	657	673	PAO_13056	1	17	-17.3	UUUGUUUUCCGUCAUUC&GGGUAGCGGGAAUCGAA	((((.(((((((.((((&)))).))))))).))))
C47E12.4d.4	43	60	PAO_13056	1	16	-17.24	UCGUUGUUUCCGAAACCC&GGGUAGCGGGAAUCGA	(((..(((((((..((((&))))..))))))))))
M02F4.8.1	994	1010	PAO_13056	1	16	-17.12	UCCUUUCCUGGCUAUUC&GGGUAGCGGGAAUCGA	((..(((((.(((((((&))))))))))))..))
F54C1.7.5	598	611	PAO_13056	1	13	-17.11	AUUCCCGCUGAUCU&GGGUAGCGGGAAU	(((((((((.((((&)))))))))))))
F55F8.5.2	54	69	PAO_13056	1	14	-17.08	GAUUUUCGUUAGUCCC&GGGUAGCGGGAAUC	(((((((((((..(((&))))))))))))))
R151.9.1	529	548	PAO_13056	1	17	-17.04	UUCGAUUUUAAUACUACACC&GGGUAGCGGGAAUCGAA	(((((((((....((((.((&))))))..)))))))))
C06H2.1.1	453	465	PAO_13056	2	14	-16.95	GAUCUUCGCUACC&GGUAGCGGGAAUC	(((.(((((((((&))))))))).)))
K02E2.4.1	246	255	PAO_13056	1	10	-16.93	UCUGCUGCCC&GGGUAGCGGG	((((((((((&))))))))))
C49A9.8.1	44	58	PAO_13056	1	12	-16.84	UUCUAAAUGCUGCCC&GGGUAGCGGGAA	((((...((((((((&))))))))))))
F44C8.1.1	103	115	PAO_13056	1	15	-16.83	CGAUUCCGCUCCC&GGGUAGCGGGAAUCG	(((((((((((((&))).))).)))))))
D1025.4.1	46	63	PAO_13056	1	17	-16.78	UUCGCAUCCUUGCUGCUC&GGGUAGCGGGAAUCGAA	((((..((((.(((((((&)))))))))))..))))
K09F6.10.1	2278	2294	PAO_13056	1	16	-16.71	UUGGUUUCACGUUAUUC&GGGUAGCGGGAAUCGA	((((((((.((((((((&))))))))))))))))
F49D11.8.1	528	543	PAO_13056	1	17	-16.7	UUCACUUUCUGUUCCC&GGGUAGCGGGAAUCGAA	(((..(((((((((((&))).))))))))..)))
F43C1.7.1	220	239	PAO_13056	1	15	-16.58	CGAUUCCCGAGGAACUGCUU&GGGUAGCGGGAAUCG	(((((((((.....((((((&)))))))))))))))
Y57A10C.6.1	1212	1227	PAO_13056	3	14	-16.57	GAUUCCCUGGAGCUGC&GUAGCGGGAAUC	(((((((....(((((&))))))))))))
B0272.3.1	21	28	PAO_13056	2	9	-16.56	CCGCUGCC&GGUAGCGG	((((((((&))))))))
K12G11.3.1	617	631	PAO_13056	1	14	-16.48	GAUCUCUUGCUAUUC&GGGUAGCGGGAAUC	(((.(((((((((((&))))))))))))))
R11A5.4a.1	1571	1586	PAO_13056	1	16	-16.4	UCGCGUUUCGCUGCUC&GGGUAGCGGGAAUCGA	(((..(((((((((((&)))))))))))..)))
C14C10.3a.1	804	812	PAO_13056	2	10	-16.36	CUCGUUGCC&GGUAGCGGG	(((((((((&)))))))))
C36A4.9a.1	430	443	PAO_13056	1	13	-16.36	AUUCUCCGCUGUUC&GGGUAGCGGGAAU	((((.(((((((((&)))))))))))))
R03D7.6c.1	37	52	PAO_13056	2	14	-16.29	GAUUUUCGCCUAUGCC&GGUAGCGGGAAUC	(((((((((...((((&)))))))))))))
C31C9.1b.1	1264	1274	PAO_13056	1	11	-16.27	UCCGGCUGCUC&GGGUAGCGGGA	(((.(((((((&))))))).)))
F12E12.11.1	105	113	PAO_13056	1	9	-16.24	CCGCUGCUC&GGGUAGCGG	(((((((((&)))))))))
M04F3.4a.1	424	435	PAO_13056	1	11	-16.21	UCACUGCUGCCU&GGGUAGCGGGA	((.(((((((((&)))))))))))
F26D10.9a.1	1583	1591	PAO_13056	3	11	-16.14	UCUCGCUAC&GUAGCGGGA	(((((((((&)))))))))
F14F7.3.1	679	688	PAO_13056	1	10	-16.08	CCCGUUGCUC&GGGUAGCGGG	((((((((((&))))))))))
C37H5.3a.1	15	27	PAO_13056	1	15	-16.02	CGAUUUCUUAUCC&GGGUAGCGGGAAUCG	(((((((((((((&)))))..))))))))
H06H21.6.1	1338	1350	PAO_13056	2	13	-16	AUUCCCGGCUAUU&GGUAGCGGGAAU	(((((((.(((((&))))))))))))
H12C20.3a.1	700	713	PAO_13056	1	16	-15.95	UCAUUCCUGUUCUC&GGGUAGCGGGAAUCGA	((((((((((((((&))).))))))))).))
R05D8.8.1	86	108	PAO_13056	1	16	-15.95	UCGAUUCUCUGGCAAAGUUGCUC&GGGUAGCGGGAAUCGA	(((((((((.......(((((((&))))))))))))))))
F21F8.11.1	1288	1303	PAO_13056	1	16	-15.94	UCGAUUUCUGGUUUCU&GGGUAGCGGGAAUCGA	((((((((((.(.(((&))).).))))))))))
C16A3.5.1	166	183	PAO_13056	1	16	-15.93	UCGAUUCGACGCUAACGC&GGGUAGCGGGAAUCGA	(((((((..((((.((.(&).)))))).)))))))
C08F8.1a.1	194	206	PAO_13056	1	13	-15.92	GUUCCUGCUGACC&GGGUAGCGGGAAU	((((((((((.((&)).))))))))))
F56E10.4.1	167	178	PAO_13056	1	12	-15.9	UUCUCGCACGCC&GGGUAGCGGGAA	(((((((((.((&)))).)))))))
C27B7.1b.1	1027	1037	PAO_13056	5	16	-15.87	UCGAUCCCGUU&AGCGGGAAUCGA	(((((((((((&))))))).))))
Y46G5A.18a.1	1063	1078	PAO_13056	2	17	-15.81	UUCGUUCCUGCUCGCC&GGUAGCGGGAAUCGAA	((((((((((((.(((&))))))))))).))))
C01B12.3.1	685	699	PAO_13056	1	17	-15.73	UUGGGUUCCUGUCCC&GGGUAGCGGGAAUCGAA	((.((((((((((((&)))..))))))))).))
D2063.1.1	477	485	PAO_13056	1	9	-15.68	CCGCUGCUC&GGGUAGCGG	(((((((((&)))))))))
F41G3.10.1	363	372	PAO_13056	1	9	-15.68	CUGCUACCAC&GGGUAGCGG	((((((((.(&)))))))))
Y48G8AL.5c.1	38	49	PAO_13056	1	12	-15.66	UUUUCGUUGCCC&GGGUAGCGGGAA	((((((((((((&))))))))))))
W07B8.5.1	93	104	PAO_13056	1	11	-15.64	UCUCCGCUAUUC&GGGUAGCGGGA	((.(((((((((&)))))))))))
C12D8.10a.1	1864	1881	PAO_13056	1	16	-15.63	UCUCUUCCUGUUCUGCCU&GGGUAGCGGGAAUCGA	((..(((((((..(((((&))))))))))))..))
Y37E3.9.1	633	646	PAO_13056	2	16	-15.63	UCGCCGCCGUUACC&GGUAGCGGGAAUCGA	(((...((((((((&))))))))....)))
C29F5.1.1	4	21	PAO_13056	1	17	-15.61	UUUUGUUCCCGAACACCC&GGGUAGCGGGAAUCGAA	(((.(((((((...((((&))))..))))))).)))
E03H4.7.1	973	990	PAO_13056	1	16	-15.57	UUGAUUUUUGUGCUGCUU&GGGUAGCGGGAAUCGA	(((((((((..(((((((&))))))))))))))))
Y22D7AL.10.2	36	51	PAO_13056	1	17	-15.57	UUCCUCACCGCUGUCC&GGGUAGCGGGAAUCGAA	(((.((.(((((((((&)))))))))))...)))
C31E10.7.1	353	370	PAO_13056	2	17	-15.56	UUCGCCCUUCUUGCUGUC&GGUAGCGGGAAUCGAA	((((...(((((((((((&))))))))))).))))
C06A8.1a.1	446	460	PAO_13056	2	17	-15.54	UUCGAUUGCUGCUUC&GGUAGCGGGAAUCGAA	(((((((.(((((((&)).))))).)))))))
F49E8.5.1	878	888	PAO_13056	1	11	-15.51	UUCCGUUACUU&GGGUAGCGGGA	(((((((((((&)))))))))))
Y54F10AM.5.1	249	261	PAO_13056	1	13	-15.49	GUUCCUGCCUUCC&GGGUAGCGGGAAU	((((((((..(((&)))..))))))))
C25A1.7.1	882	898	PAO_13056	1	15	-15.48	CGUGUCCUCUGCUAUUC&GGGUAGCGGGAAUCG	((..((((..(((((((&)))))))))))..))
F08H9.6.1	53	65	PAO_13056	1	14	-15.46	GAUUCUUCUCCCC&GGGUAGCGGGAAUC	(((((((((.(((&))).)).)))))))
K06A5.6.2	189	202	PAO_13056	2	15	-15.44	CGGUCGUCGCUACC&GGUAGCGGGAAUCG	((((..((((((((&))))))))..))))
C27A7.5a.1	425	434	PAO_13056	1	11	-15.43	UCCCGUUCCC&GGGUAGCGGGA	((((((((((&))).)))))))
K02A11.3.1	474	492	PAO_13056	1	17	-15.33	UUUGGUUUUCACACUACUC&GGGUAGCGGGAAUCGAA	((((((((((...((((((&)))))).))))))))))
K02E11.10.1	847	856	PAO_13056	1	10	-15.26	UCCGCUGCUC&GGGUAGCGGG	((((((((((&))))))))))
C44B7.10.1	178	192	PAO_13056	1	15	-15.24	CGGAAUCGCUGCCAC&GGGUAGCGGGAAUCG	(((..((((((((.(&)))))))))...)))
K10D2.6.1	1351	1359	PAO_13056	2	10	-15.24	CCCGUUACU&GGUAGCGGG	(((((((((&)))))))))
C17C3.1b.1	42	56	PAO_13056	1	17	-15.18	UUCCUCCCGUUUUUC&GGGUAGCGGGAAUCGAA	(((.(((((((.(((&))).)))))))...)))
C06E7.1a.1	1361	1378	PAO_13056	1	15	-15.17	UGUAUUUCCGCAAUAUCC&GGGUAGCGGGAAUCG	((.((((((((..(((((&)))))))))))))))
Y54E10A.17a.1	345	359	PAO_13056	1	16	-15.17	UCGAUUUGCUCGCCC&GGGUAGCGGGAAUCGA	(((((((.(.(((((&)))).).).)))))))
C49G7.3.1	373	387	PAO_13056	1	15	-15.15	UGAUUUUGAUUGCCC&GGGUAGCGGGAAUCG	(((((((..((((((&))))))..)))))))
Y82E9BR.18.1	2509	2526	PAO_13056	1	16	-15.14	UCGAUUCUUACAACACUU&GGGUAGCGGGAAUCGA	(((((((((.(...((((&)))).).)))))))))
F27D4.1.1	294	306	PAO_13056	1	13	-15.09	AUUCUUGCUUCUC&GGGUAGCGGGAAU	(((((((((.(((&))).)))))))))
F28C10.3.1	1416	1432	PAO_13056	2	17	-15.06	UUCACUUUCCCGUUUAC&GGUAGCGGGAAUCGAA	(((...((((((((..(&)..))))))))..)))
F40F4.4a.1	516	531	PAO_13056	2	15	-15.03	CGAGUUCCUGGCUGCU&GGUAGCGGGAAUCG	((.(((((((.(((((&))))))))))))))
F43E2.3a.1	236	255	PAO_13056	1	17	-15.03	UUCGAAAUAUCAAGUUGCCC&GGGUAGCGGGAAUCGAA	(((((....((..(((((((&)))))))..)).)))))
ZC376.7a.1	1165	1179	PAO_13056	1	14	-15	GAAAUCUGCUACGCC&GGGUAGCGGGAAUC	((..((((((((.((&))))))))))..))
C06G3.1a.1	137	153	PAO_13056	1	16	-14.98	UCAUUUCCUUGUUAUUC&GGGUAGCGGGAAUCGA	((..(((((.(((((((&))))))))))))..))
K09A9.1.1	401	413	PAO_13056	3	15	-14.98	UGGUUCCGGCUGC&GUAGCGGGAAUCG	(((((((.(((((&))))).)))))))
F08F3.7.1	868	883	PAO_13056	1	16	-14.91	UUGUUUCCGCUUUUCC&GGGUAGCGGGAAUCGA	(((((((((((..(((&))).)))))))).)))
C30H6.7a.1	1039	1051	PAO_13056	1	14	-14.89	GAUUCUCAUACUC&GGGUAGCGGGAAUC	(((((((.(((((&)))))..)))))))
ZK455.1.1	756	767	PAO_13056	2	14	-14.89	GAUACCGUUACC&GGUAGCGGGAAUC	(((.((((((((&))))))))..)))
D2023.2a.1	1543	1552	PAO_13056	2	11	-14.83	UCUUGCUACU&GGUAGCGGGA	((((((((((&))))))))))
F53F4.10.1	712	730	PAO_13056	1	17	-14.81	UUCGGUUUGCAAGCUGCUC&GGGUAGCGGGAAUCGAA	((((((((.(..(((((((&)))))))).))))))))
C35B1.1.1	338	355	PAO_13056	1	16	-14.79	UCGAUUCAGUCGUUGCUC&GGGUAGCGGGAAUCGA	(((((((..(((((((((&))))))))))))))))
C47A10.1.1	351	362	PAO_13056	2	13	-14.76	AUUUUUGCUGCU&GGUAGCGGGAAU	((((((((((((&))))))))))))
F02A9.4.1	906	918	PAO_13056	2	15	-14.76	CGAUCGUGCUGCC&GGUAGCGGGAAUCG	(((((.(((((((&))))))).).))))
C05C10.3.1	450	461	PAO_13056	1	13	-14.7	GUUCCCGCAUUC&GGGUAGCGGGAAU	((((((((((((&)))).))))))))
K01D12.10.1	215	222	PAO_13056	2	9	-14.68	CUGCUACC&GGUAGCGG	((((((((&))))))))
K01C8.10.1	1661	1673	PAO_13056	1	12	-14.58	UUCCUGCUCUACC&GGGUAGCGGGAA	((((((((...((&))..))))))))
Y49C4A.8a.1	532	545	PAO_13056	1	13	-14.56	AUUCUUGUCUACUC&GGGUAGCGGGAAU	(((((((.((((((&)))))))))))))
Y73C8C.2.1	1046	1053	PAO_13056	2	9	-14.55	CUGCUGCC&GGUAGCGG	((((((((&))))))))
E02H1.3.1	179	197	PAO_13056	1	16	-14.54	UGGAUUUUCUCGCUCAUCC&GGGUAGCGGGAAUCGA	(.(((..(((((((.((((&)))))))))))))).)
C34C12.8.1	813	824	PAO_13056	1	12	-14.53	UUUCCGUUAUUU&GGGUAGCGGGAA	((((((((((((&))))))))))))
F22A3.6a.1	339	345	PAO_13056	3	9	-14.53	CCGCUAC&GUAGCGG	(((((((&)))))))
F11G11.2.1	257	269	PAO_13056	1	16	-14.51	UCGCCCGUUACUU&GGGUAGCGGGAAUCGA	(((((((((((((&))))))))))...)))
Y53G8B.2.1	150	161	PAO_13056	1	12	-14.49	UUCUUGCUUUUC&GGGUAGCGGGAA	((((((((.(((&))).))))))))
C46F4.2.1	1263	1274	PAO_13056	3	15	-14.48	CGGUCCCGUUAU&GUAGCGGGAAUCG	((((((((((((&)))))))).))))
Y105E8A.4.1	534	544	PAO_13056	3	13	-14.44	GUUCCCGGUGC&GUAGCGGGAAU	(((((((.(((&))).)))))))
C27H6.4a.1	999	1017	PAO_13056	1	17	-14.41	UUUGGUUCCUCUUCAUCCC&GGGUAGCGGGAAUCGAA	((((((((((...(..(((&)))..).))))))))))
Y46H3A.3a.1	62	78	PAO_13056	1	15	-14.35	CUAUUUCCGUCCAGCUC&GGGUAGCGGGAAUCG	(.((((((((...((((&)))).)))))))).)
F09B12.3.1	1225	1240	PAO_13056	1	16	-14.33	UCGUAUUUCCCGUCCU&GGGUAGCGGGAAUCGA	(((...((((((((((&)))..))))))).)))
F38E11.1.1	50	60	PAO_13056	1	11	-14.28	UUUCGUUGCUC&GGGUAGCGGGA	(((((((((((&)))))))))))
B0361.8.1	421	433	PAO_13056	2	16	-14.26	UCAUUCUCGCACU&GGUAGCGGGAAUCGA	(((((((((((((&))).)))))))).))
F14F9.4.1	2390	2402	PAO_13056	2	14	-14.18	GAUUCCUGGAAUC&GGUAGCGGGAAUC	((((((((..(((&)))..))))))))
K07C5.4.1	463	478	PAO_13056	1	16	-14.18	UCGGUCAUAGUUACUC&GGGUAGCGGGAAUCGA	((((((...(((((((&)))))))..).)))))
Y38F1A.6.1	1300	1313	PAO_13056	3	17	-14.17	UUUGAUUUCUGCAC&GUAGCGGGAAUCGAA	((((((((((((((&)).))))))))))))
R107.5a.1	439	451	PAO_13056	2	16	-14.16	UUGAUUUCUUACC&GGUAGCGGGAAUCGA	(((((((((((((&))))..)))))))))
F53A2.7.1	786	794	PAO_13056	1	9	-14.15	CCGCUGCUC&GGGUAGCGG	(((((((((&)))))))))
R04B5.6.1	340	355	PAO_13056	1	15	-14.15	CGUUUUUUCGCUACUC&GGGUAGCGGGAAUCG	((..((((((((((((&)))))))))))).))
ZK617.2.1	837	847	PAO_13056	1	11	-14.13	UGCUGCUAUUC&GGGUAGCGGGA	(.(((((((((&))))))))).)
F09F7.4a.1	1050	1060	PAO_13056	6	15	-14.08	CGAUUCCUCGC&GCGGGAAUCG	(((((((.(((&))))))))))
R07E5.2.1	35	51	PAO_13056	2	15	-14.04	CGGUUCCUACUGUUGCC&GGUAGCGGGAAUCG	((((((((...((((((&))))))))))))))
CD4.7b.1	91	104	PAO_13056	3	15	-14.02	CGAAAACCUGCUGC&GUAGCGGGAAUCG	(((...((((((((&))))))))..)))
F37B4.2.1	766	776	PAO_13056	6	17	-13.94	UUCGUUCCCGC&GCGGGAAUCGAA	(((((((((((&))))))).))))
C14A4.14.1	1325	1338	PAO_13056	1	14	-13.93	GAUUUUAGCUAUCU&GGGUAGCGGGAAUC	((((((.(((((((&))))))).))))))
Y46H3D.6a.1	976	990	PAO_13056	3	17	-13.92	UUCGAUUUUCGAGAC&GUAGCGGGAAUCGAA	(((((((((((..((&))..)))))))))))
F09E5.3.1	954	967	PAO_13056	1	14	-13.9	GGUUUUCCCUAUUC&GGGUAGCGGGAAUC	(((((((.((((((&)))))).)))))))
F58B3.1.1	335	343	PAO_13056	2	10	-13.88	UCUGCUGCC&GGUAGCGGG	(((((((((&)))))))))
C05A9.1a.1	1760	1772	PAO_13056	1	13	-13.86	AUUGUUGUUGCCC&GGGUAGCGGGAAU	(((.(((((((((&))))))))).)))
C45B11.3.1	702	720	PAO_13056	1	14	-13.84	GAUUCUGCAUACGCUAUUC&GGGUAGCGGGAAUC	((((((.....((((((((&))))))))))))))
F42E11.1a.1	4053	4063	PAO_13056	1	11	-13.8	UCUUGUUAUUC&GGGUAGCGGGA	(((((((((((&)))))))))))
F32D8.12a.1	1020	1027	PAO_13056	1	8	-13.77	CGCUGCUC&GGGUAGCG	((((((((&))))))))
C55B7.4a.1	1043	1053	PAO_13056	1	11	-13.73	UAAUGCUGCCC&GGGUAGCGGGA	(..((((((((&))))))))..)
E04A4.4c.2	697	708	PAO_13056	6	17	-13.72	UUUGGUUCCAGC&GCGGGAAUCGAA	(((((((((.((&)).)))))))))
ZK1320.4.1	1736	1746	PAO_13056	1	13	-13.59	AUUUUCGACCC&GGGUAGCGGGAAU	(((((((((((&))))..)))))))
C17G10.8.1	852	865	PAO_13056	1	15	-13.57	CGAUUUCUUUAUUC&GGGUAGCGGGAAUCG	((((((((((((((&)))))).))))))))
Y71F9B.4.1	243	269	PAO_13056	1	17	-13.56	UUCGAUCUCCACAAUUUCCUGUCACUU&GGGUAGCGGGAAUCGAA	(((((..........(((((((.((((&)))).))))))))))))
C33A12.3a.1	459	476	PAO_13056	1	14	-13.55	GAUUCCUCUUGCAUACUU&GGGUAGCGGGAAUC	(((((((...((.(((((&))))))))))))))
ZC155.1.1	952	961	PAO_13056	2	10	-13.54	CCACGCUACU&GGUAGCGGG	((.(((((((&)))))))))
C52G5.2.1	648	665	PAO_13056	2	14	-13.49	GAUUCCUCAGUUGUUGCC&GGUAGCGGGAAUC	(((((((.....((((((&)))))))))))))
K07E3.8.1	304	311	PAO_13056	1	8	-13.47	CGCUACCC&GGGUAGCG	((((((((&))))))))
C54D10.1.1	361	381	PAO_13056	1	11	-13.46	UCCCAUCUCUACCAGCUGCUC&GGGUAGCGGGA	((((..........(((((((&)))))))))))
B0457.6.1	65	83	PAO_13056	1	16	-13.43	UCGAUUCGCAUCGGAGCCC&GGGUAGCGGGAAUCGA	(((((((...(((..((((&))))..))))))))))
Y73C8B.1.1	349	362	PAO_13056	1	15	-13.38	CGAAAUAGCUACUC&GGGUAGCGGGAAUCG	(((....(((((((&))))))).....)))
F28F8.2.1	102	120	PAO_13056	1	14	-13.16	GAUUCUCAUCACCUGACCC&GGGUAGCGGGAAUC	(((((((.....(((.(((&)))))).)))))))
F40E10.3.1	942	957	PAO_13056	1	16	-13.13	UCAUUCUUGUCGACCC&GGGUAGCGGGAAUCGA	((((((((((..((((&)))).)))))))).))
F54D11.1.1	478	494	PAO_13056	2	16	-13.13	UCGGUGGAACCGUUAUC&GGUAGCGGGAAUCGA	(((((....((((((((&))))))))..)))))
F56C11.6b.1	31	38	PAO_13056	8	15	-13.13	CGAUUCCU&GGGAAUCG	((((((((&))))))))
C12C8.1.1	22	32	PAO_13056	1	11	-13.11	UUCUGCUAUUC&GGGUAGCGGGA	(((((((((((&)))))))))))
F07F6.8.1	96	105	PAO_13056	1	10	-13.11	CUUGCUAUUU&GGGUAGCGGG	((((((((((&))))))))))
W02D3.5.1	418	431	PAO_13056	1	14	-13.1	GAUUCUCAAUUCCC&GGGUAGCGGGAAUC	(((((((....(((&)))....)))))))
F31D4.9.1	59	66	PAO_13056	3	10	-13.04	CCUGCUAC&GUAGCGGG	((((((((&))))))))
F28A10.6.1	1097	1115	PAO_13056	1	14	-13.03	GAUUCCUGAAAGAUUAUCC&GGGUAGCGGGAAUC	((((((((.....((((((&))))))))))))))
R07E3.1a.1	1336	1357	PAO_13056	1	17	-12.99	UUCGUUUUCUCGCAAAAUUCCC&GGGUAGCGGGAAUCGAA	((((..(((((((......(((&)))..))))))).))))
F41C3.5.3	44	54	PAO_13056	1	11	-12.94	UUCUGCUUCUC&GGGUAGCGGGA	(((((((.(((&))).)))))))
F57B9.6a.1	209	218	PAO_13056	1	10	-12.91	UCUGCUAUUC&GGGUAGCGGG	((((((((((&))))))))))
C14B1.3.1	1205	1212	PAO_13056	4	11	-12.89	UCCCGCUG&UAGCGGGA	((((((((&))))))))
F56B3.5.1	446	458	PAO_13056	1	13	-12.87	AUUCGUGUUGCUU&GGGUAGCGGGAAU	((((.((((((((&)))))))).))))
Y57G11C.34.1	569	584	PAO_13056	2	15	-12.87	CGAGCUUCUCGCCGCC&GGUAGCGGGAAUCG	(((..(((((((.(((&))).))))))))))
F13C5.1.1	161	169	PAO_13056	2	10	-12.85	UCCGCUAGC&GGUAGCGGG	(((((((.(&).)))))))
DC2.5a.1	876	894	PAO_13056	1	17	-12.8	UUCGGUUCAUCCGGGAUCC&GGGUAGCGGGAAUCGAA	((((((((..(((..((((&))))..)))))))))))
K08E5.1b.1	594	602	PAO_13056	2	10	-12.71	CUUGCUGCC&GGUAGCGGG	(((((((((&)))))))))
C55A6.5.1	518	529	PAO_13056	3	13	-12.55	GUUCUCGCCUAC&GUAGCGGGAAU	((((((((.(((&)))))))))))
M88.1.1	962	976	PAO_13056	3	17	-12.53	UUCAAUUCUCGAAGC&GUAGCGGGAAUCGAA	(((.(((((((..((&))..))))))).)))
C15C8.3a.1	295	309	PAO_13056	1	16	-12.39	UCGAUUCUGGUUCUU&GGGUAGCGGGAAUCGA	((((((((.((((((&))).))).))))))))
C29F7.2a.1	751	762	PAO_13056	1	13	-12.33	AUUUCCGUUCUC&GGGUAGCGGGAAU	((((((((((((&))).)))))))))
B0564.1a.1	629	643	PAO_13056	1	12	-12.3	UUCCCAGAGUUACUC&GGGUAGCGGGAA	(((((...(((((((&))))))))))))
C28C12.7b.1	1014	1025	PAO_13056	1	13	-12.3	GUUCAGUUGCCC&GGGUAGCGGGAAU	((((.(((((((&)))))))..))))
C12D5.7.1	1289	1299	PAO_13056	1	11	-12.29	UGCUGUUACUC&GGGUAGCGGGA	(.(((((((((&))))))))).)
Y60A3A.7.1	539	552	PAO_13056	2	14	-12.25	GAUUCCCAAAGGCC&GGUAGCGGGAAUC	(((((((....(((&)))...)))))))
W09H1.5.1	388	406	PAO_13056	1	13	-12.2	AUUCCCGACAGAUCUGGCC&GGGUAGCGGGAAU	(((((((......(((.((&)).))))))))))
C02A12.1.1	605	627	PAO_13056	1	15	-12.12	CGAUUUCCCAGUAGUCAAUGCCU&GGGUAGCGGGAAUCG	((((((((..........(((((&)))))..))))))))
F49E12.9a.1	898	910	PAO_13056	1	12	-12.08	UUCCCGUUUAUGC&GGGUAGCGGGAA	((((((((.((.(&).))))))))))
F52E4.5.1	216	230	PAO_13056	1	14	-11.97	GAUUUCCCGGAGCUC&GGGUAGCGGGAAUC	(((((((.(..((((&))))..))))))))
Y50D4B.2a.1	569	577	PAO_13056	1	9	-11.86	CCGCUGCUU&GGGUAGCGG	(((((((((&)))))))))
F44E7.8a.1	1583	1593	PAO_13056	3	13	-11.85	AUUUUUGUUAC&GUAGCGGGAAU	(((((((((((&)))))))))))
ZK822.5b.1	85	98	PAO_13056	1	11	-11.69	UCCUUCAGUUGCUC&GGGUAGCGGGA	((((...(((((((&)))))))))))
C52B9.7a.1	219	233	PAO_13056	2	14	-11.67	GAUUCUCAAGCCGCC&GGUAGCGGGAAUC	(((((((..((.(((&))).)))))))))
R02E12.6.1	123	136	PAO_13056	1	16	-11.67	UCUUUUCUGCAUCU&GGGUAGCGGGAAUCGA	((.(((((((((((&)))).)))))))..))
F54D5.12.1	234	242	PAO_13056	6	14	-11.51	GGUUUCUGC&GCGGGAAUC	(((((((((&)))))))))
ZK697.14.1	555	570	PAO_13056	1	17	-11.48	UUCGGUUGAGCUGGCC&GGGUAGCGGGAAUCGAA	(((((((..((((.((&)).))))...)))))))
VC5.5.1	265	278	PAO_13056	1	14	-11.47	GACCACUGCUGUCC&GGGUAGCGGGAAUC	((...(((((((((&)))))))))...))
DH11.2.1	889	901	PAO_13056	1	13	-11.46	GUUCCCGGAAUUU&GGGUAGCGGGAAU	(((((((..((((&))))..)))))))
C23H5.8a.1	201	214	PAO_13056	1	13	-11.39	AUUCUCGAGUACGC&GGGUAGCGGGAAU	(((((((..(((.(&).))).)))))))
Y73F4A.2.1	44	59	PAO_13056	1	15	-11.35	CGAUCCAUUGCUGUUC&GGGUAGCGGGAAUCG	((((((..((((((((&)))))))))).))))
F44G3.2.1	859	870	PAO_13056	6	17	-11.29	UUCAAUUCUCGC&GCGGGAAUCGAA	(((.((((((((&)))))))).)))
F54B8.4a.1	333	343	PAO_13056	1	12	-11.07	UUCCUGUAUUC&GGGUAGCGGGAA	(((((((((((&)))).)))))))
F08A8.3.1	1177	1187	PAO_13056	1	11	-11.01	UGUUGUUACUC&GGGUAGCGGGA	(.(((((((((&))))))))).)
ZC97.1a.1	577	589	PAO_13056	1	14	-10.93	GUUUUCCGUGCUC&GGGUAGCGGGAAUC	(.(((((((((((&)))).))))))).)
ZK652.2.1	229	239	PAO_13056	1	11	-10.92	UUUUGUUAGCC&GGGUAGCGGGA	((((((((.((&)).))))))))
B0205.6.1	163	177	PAO_13056	1	15	-10.72	UGAUUUCGGAAAUCC&GGGUAGCGGGAAUCG	(((((((.(..((((&))))..).)))))))
W01A8.1b.1	1271	1294	PAO_13056	1	17	-10.56	UUUGUUUUUGUCAGACCUUUGCCC&GGGUAGCGGGAAUCGAA	(((((((((((........(((((&)))))))))))).))))
F16B4.9.1	115	121	PAO_13056	1	7	-10.5	GCUAUCC&GGGUAGC	(((((((&)))))))
F59B1.8.1	953	966	PAO_13056	2	15	-10.49	CUAUUUCCGGAGCC&GGUAGCGGGAAUCG	(.(((((((..(((&)))..))))))).)
C07G3.2.1	26	40	PAO_13056	1	13	-10.36	GUUUCCGAAGACCGC&GGGUAGCGGGAAU	(((((((...(((.(&))))..)))))))
C54G6.5.2	25	45	PAO_13056	1	16	-10.3	UCGUCCUUCUGCUCGUCGCCU&GGGUAGCGGGAAUCGA	(((...(((((((....((((&)))))))))))..)))
D1005.3.2	59	74	PAO_13056	6	17	-10.11	UUCGAAACCUUUUCGC&GCGGGAAUCGAA	(((((....(((((((&))))))))))))
F22B5.4.1	190	197	PAO_13056	6	13	-9.9	AUUCUCGU&GCGGGAAU	((((((((&))))))))
W10D9.5b.1	210	223	PAO_13056	2	16	-9.76	UUGAUUUUCUCGCC&GGUAGCGGGAAUCGA	(((((((((.((((&))).).)))))))))
C15B12.8.1	1112	1123	PAO_13056	1	16	-9.69	UUGAUGUUACCU&GGGUAGCGGGAAUCGA	((((((((((((&)))))))....)))))
C01B10.11.1	558	577	PAO_13056	1	17	-9.6	UUCGAUUCGGUCGCCGACUU&GGGUAGCGGGAAUCGAA	((((((((..((((..((((&)))).))))))))))))
F53C3.6a.1	802	814	PAO_13056	1	10	-8.58	UCUGUUGCAUUCC&GGGUAGCGGG	((((((((...((&))))))))))
ZC155.1.1	193	212	PAO_13088	3	21	-14.99	GGCUCUUGACAAGAAGUUCU&GGGGCUUCGAUCAAGAGCU	(((((((((...((((((((&))))))))..)))))))))
F58B3.1.1	100	117	PAO_13088	3	20	-14.83	GCUUUUGAUCGGUGCUGC&GGGGCUUCGAUCAAGAGC	((((((((((((.(((.(&).))).))))))))))))
F44E7.8a.1	609	622	PAO_13088	1	14	-14.82	GAUUGGAGUCCUGG&CCGGGGCUUCGAUC	((((((((((((((&))))))))))))))
Y46H3A.2.1	130	148	PAO_13088	1	20	-14.49	GCUCUUGAUCAUUUCUUGG&CCGGGGCUUCGAUCAAGAGC	(((((((((((..((((((&))))))..).))))))))))
Y37E3.9.1	730	743	PAO_13088	2	14	-14.28	GAUUGAGGCCGCCG&CGGGGCUUCGAUC	((((((((((.(((&)))))))))))))
R02E12.6.1	737	754	PAO_13088	3	20	-14.07	GCUCUUGGCCGCCGCUCC&GGGGCUUCGAUCAAGAGC	((((((((.((..(((((&)))))..)).))))))))
E04A4.4a.1	1743	1768	PAO_13088	3	23	-13.72	GAAGCUUUCGAGUCCCUCGGAGCCCC&GGGGCUUCGAUCAAGAGCUUC	((((((((.((.....((((((((((&)))))))))))).))))))))
F37B4.7.1	276	293	PAO_13088	2	21	-13.31	AGCUACUUGAUCACCCUG&CGGGGCUUCGAUCAAGAGCU	((((.(((((((.(((((&)))))....)))))))))))
D2023.2a.1	409	428	PAO_13088	2	20	-13.09	GUUCAUUGGUCCUAGCCCCG&CGGGGCUUCGAUCAAGAGC	((((.((((((..(((((((&)))))))..))))))))))
C06H2.1.1	50	75	PAO_13088	1	23	-13.08	GAAGCUCGCCGAGCGUUUGGUCCCGG&CCGGGGCUUCGAUCAAGAGCUUC	(((((((...((.((...((((((((&)))))))).)).))..)))))))
F57B9.6a.1	348	366	PAO_13088	3	22	-13.02	AAGCUCUCGUUAUGGCCCC&GGGGCUUCGAUCAAGAGCUU	(((((((.(((..((((((&))))))..)).).)))))))
K12G11.3.1	91	111	PAO_13088	1	20	-13.01	GCUCUUGUCUUCGAUACCUGG&CCGGGGCUUCGAUCAAGAGC	(((((((...((((..(((((&)))))...)))).)))))))
C55B7.3.1	1116	1134	PAO_13088	1	18	-12.89	UUGUGAUCGAAGGACCUGG&CCGGGGCUUCGAUCAAGA	((.(((((((((..(((((&))))).))))))))).))
H06H21.6.1	742	766	PAO_13088	1	23	-12.85	GAUGUUCAUUUGGUGGAGGCUCUGG&CCGGGGCUUCGAUCAAGAGCUUC	((.((((..(((((.((((((((((&)))))))))).))))))))).))
Y58A7A.3.1	389	405	PAO_13088	3	19	-12.81	CUUUUGGCCGGAGCUCC&GGGGCUUCGAUCAAGAG	(((((((.(((((((((&))))))))).)))))))
Y50E8A.16.1	874	886	PAO_13088	4	17	-12.78	CUUGAUCGAGCCC&GGGCUUCGAUCAAG	(((((((((((((&)))).)))))))))
C29F5.1.1	1038	1062	PAO_13088	3	23	-12.74	GAUGUCUCUAAAAUGAUGAAGCCCC&GGGGCUUCGAUCAAGAGCUUC	((.(.((((....((((((((((((&)))))))).))))))))).))
C27A7.5a.1	809	830	PAO_13088	2	23	-12.66	GGAGAAUCUUAUCGGAGCUUUG&CGGGGCUUCGAUCAAGAGCUUC	((((..((((((((((((((((&)))))))))))).)))).))))
F49E8.5.1	152	169	PAO_13088	5	23	-12.61	GGAGCUCUUGAUUGUGUC&GGCUUCGAUCAAGAGCUUC	((((((((((((((.(((&)))..))))))))))))))
F28A10.6.1	175	198	PAO_13088	1	22	-12.59	GAGCUCCCGAUGGACGUGCUCCGG&CCGGGGCUUCGAUCAAGAGCUU	((((((..(((.((...(((((((&))))))).)).)))..))))))
C47A10.1.1	1985	1999	PAO_13088	3	23	-12.44	GAAGCCCGGAGCCCC&GGGGCUUCGAUCAAGAGCUUC	(((((((((((((((&))))))))).....).)))))
F22E10.3.1	3374	3396	PAO_13088	1	23	-12.43	GUUGCUCUUGUCGGGCCAUCCGG&CCGGGGCUUCGAUCAAGAGCUUC	(..((((((((((((((..((((&)))))))).))).)))))))..)
B0457.6.1	74	85	PAO_13088	2	13	-12.41	AUCGGAGCCCCG&CGGGGCUUCGAU	((((((((((((&))))))))))))
F57C12.4.1	3932	3951	PAO_13088	1	21	-12.18	AGCGUUAGAUACCGCCCCGG&CCGGGGCUUCGAUCAAGAGCU	(((.((.(((...(((((((&)))))))....))).)).)))
Y82E9BR.18.1	1823	1841	PAO_13088	7	23	-12.08	GAAGCUUUAUGAUCCGAGG&CUUCGAUCAAGAGCUUC	((((((((.((((.(((((&)))))))))))))))))
C05C10.3.1	168	190	PAO_13088	1	22	-12.06	AAGCUUUUAGUUGGCGGCUUCGG&CCGGGGCUUCGAUCAAGAGCUU	((((((((.(((((.((((((((&))))))))))))).))))))))
C05E4.9b.1	2790	2810	PAO_13088	1	19	-12.05	CUCUUGGCUCAGAGGAACCGG&CCGGGGCUUCGAUCAAGAG	(((((((.((.((((..((((&))))..)))))))))))))
K02E11.10.1	366	386	PAO_13088	1	21	-12.02	AGCUCUUGGAGGAGGUCUGGG&CCGGGGCUUCGAUCAAGAGCU	(((((((((..(((((((.((&)).)))))))..)))))))))
W03G1.5.1	799	813	PAO_13088	1	14	-11.89	GAUCGGGGUCACCGG&CCGGGGCUUCGAUC	((((((((((.((((&))))))))))))))
F11C1.5a.1	2183	2203	PAO_13088	1	20	-11.62	GCUUUUGAUCGGUAACCAAGG&CCGGGGCUUCGAUCAAGAGC	((((((((((((...((..((&))..))..))))))))))))
F58F9.7.1	290	309	PAO_13088	4	23	-11.58	GAAGCUUAUGAUCAAGGCAC&GGGCUUCGAUCAAGAGCUUC	(((((((.(((((.((((.(&).)))).))))).)))))))
F52E4.5.1	224	249	PAO_13088	1	23	-11.49	GGAGCUCGUAAGCGAAGAAAACUCGG&CCGGGGCUUCGAUCAAGAGCUUC	(((((((.....(((((....(((((&))))).))))).....)))))))
F02A9.4.1	415	431	PAO_13088	6	23	-11.48	GAGGAAUUGAUUGAAGC&GCUUCGAUCAAGAGCUUC	((((..(((((((((((&)))))))))))...))))
C06G3.1a.1	865	880	PAO_13088	1	16	-11.44	UUGAUCGAAUUCCCGG&CCGGGGCUUCGAUCAA	(((((((((.((((((&)))))).)))))))))
E03H4.7.1	780	808	PAO_13088	3	23	-11.38	GAAGCUUCAUCCCCUAAUUGUCAGGCCCC&GGGGCUUCGAUCAAGAGCUUC	(((((((..........((((((((((((&))))))).)).))))))))))
Y57A10C.6.1	1196	1221	PAO_13088	1	22	-11.34	GGGCUCUAUAGAUUGGGAUUCCCUGG&CCGGGGCUUCGAUCAAGAGCUU	(((((((...(((((((...((((((&)))))).))))))).)))))))
M88.1.1	1417	1441	PAO_13088	1	19	-11.33	CUCUUGAUAAUUUGGAGCCAGCUGG&CCGGGGCUUCGAUCAAGAG	(((((((....((((((((..((((&)))))))))))))))))))
F12E12.11.1	442	464	PAO_13088	1	23	-11.26	GGAGCACUUGAUCAAGACCAAGG&CCGGGGCUUCGAUCAAGAGCUUC	(((((.((((((((((.((..((&))..))))).))))))).)))))
C27H6.4a.1	474	495	PAO_13088	2	23	-11.23	GAAGUACGCUACCGAAGCCUGG&CGGGGCUUCGAUCAAGAGCUUC	(((((.(.....((((((((.(&).)))))))).....).)))))
ZK896.5.1	1060	1084	PAO_13088	2	20	-11.19	GCUUUAAAUGCUGAUUGGAGCUCUG&CGGGGCUUCGAUCAAGAGC	(((((......((((((((((((((&)))))))))))))))))))
Y49C4A.8a.1	1566	1586	PAO_13088	2	21	-11.16	AGCUCUUCUCAAUGAUCCCCG&CGGGGCUUCGAUCAAGAGCU	(((((((.....(((.(((((&)))))..)))...)))))))
F09B12.3.1	209	234	PAO_13088	3	22	-11.15	AAGUUCUUGAUGGAUUCGACUGCCGC&GGGGCUUCGAUCAAGAGCUU	((((((((((.....((((..(((.(&).))).))))))))))))))
F09E5.3.1	429	449	PAO_13088	3	22	-11.04	AAGUUCUUGAAGUCGAGCUCU&GGGGCUUCGAUCAAGAGCUU	((((((((((..(((((((((&)))))).)))))))))))))
Y53G8B.2.1	876	895	PAO_13088	3	23	-10.95	GAUACCGUAGUCGGAGCCCC&GGGGCUUCGAUCAAGAGCUUC	((..((...(((((((((((&)))))))))))...).)..))
R04B5.6.1	51	65	PAO_13088	3	18	-10.88	UCUUGAACAAGCUCC&GGGGCUUCGAUCAAGA	((((((.((((((((&))))))).).))))))
Y53F4B.33.1	71	85	PAO_13088	3	18	-10.88	UCUUGCCGGAGUCCC&GGGGCUUCGAUCAAGA	(((((.(((((((((&)))))))))..)))))
C29F7.2a.1	954	977	PAO_13088	1	22	-10.84	AAGCUCUGGAUUAGAAGCAAAAGG&CCGGGGCUUCGAUCAAGAGCUU	(((((((.((((.(((((....((&))...))))))))).)))))))
F59B1.8.1	560	580	PAO_13088	1	22	-10.77	AGGCUCUUGCAAGGCUCCAGG&CCGGGGCUUCGAUCAAGAGCUU	((((((((((.(((((((.((&))))))))).)..)))))))))
ZK455.4.1	676	684	PAO_13088	2	10	-10.75	GGAGCCCCG&CGGGGCUUC	(((((((((&)))))))))
C31E10.7.1	218	239	PAO_13088	2	22	-10.63	GAGUAUUUGAUCGGAGAAGUCG&CGGGGCUUCGAUCAAGAGCUU	((((.(((((((((((...(((&)))..))))))))))).))))
C49G7.3.1	55	78	PAO_13088	3	20	-10.61	GGUCUUGAUUGCUUUUCUGGCUCC&GGGGCUUCGAUCAAGAGC	(.(((((((((.......((((((&)))))).))))))))).)
C06A8.1a.1	1370	1385	PAO_13088	5	21	-10.55	AGCUAUGUUCGGAGCC&GGCUUCGAUCAAGAGCU	((((.((.((((((((&)))))))).))..))))
F10E7.8a.1	221	242	PAO_13088	3	22	-10.48	AAGCUCUGAUAAUGUUGCCGCC&GGGGCUUCGAUCAAGAGCUU	((((((((((..((..(((.((&)))))..))))).)))))))
F54D5.12.1	462	488	PAO_13088	1	23	-10.45	GAUGCCUUUUGAUCUCGGAGCCAAAGG&CCGGGGCUUCGAUCAAGAGCUUC	((.((.((((((((..((((((...((&))..)))))))))))))))).))
ZC376.7a.1	925	946	PAO_13088	2	22	-10.45	GAGCUCUUCAUCAUCAGCGUCG&CGGGGCUUCGAUCAAGAGCUU	((((((((.(((...(((.(((&))).)))..))).))))))))
W01A8.1b.2	1608	1627	PAO_13088	3	22	-10.43	GAGCUCUACUUCGAUGCGCC&GGGGCUUCGAUCAAGAGCUU	(((((((...((((.((.((&)).)).))))...)))))))
F09F3.9.1	937	956	PAO_13088	1	23	-10.24	GAUACUUUUGAUCGAAACGG&CCGGGGCUUCGAUCAAGAGCUUC	((..((((((((((((.(((&)))....))))))))))))..))
C05A9.1a.1	3575	3593	PAO_13088	1	23	-10.17	GAAGCGACGAGUGCUCUGG&CCGGGGCUUCGAUCAAGAGCUUC	(((((((((((.(((((((&))))))))))).))....)))))
M117.2a.1	474	495	PAO_13088	1	23	-10.12	GAGGCUCUUGAUAUCGCUAAGG&CCGGGGCUUCGAUCAAGAGCUUC	((((((((((((...(((..((&))..)))....))))))))))))
R03D7.1.1	3338	3358	PAO_13088	2	22	-10.11	AAGCUCUUGCCGAUCGUCUUG&CGGGGCUUCGAUCAAGAGCUU	(((((((((.(((..((((((&)))))).)))..)))))))))
Y46G5A.18a.1	509	518	PAO_13088	3	12	-10.11	UCGAAGCUCC&GGGGCUUCGA	((((((((((&))))))))))
F22B5.4.1	66	79	PAO_13088	3	16	-10.09	UUGAGCAAAGCCCC&GGGGCUUCGAUCAA	((((.(.(((((((&))))))).).))))
F15E6.6.1	3058	3069	PAO_13088	1	11	-10.07	CGAAUGCUCCGG&CCGGGGCUUCG	((((.(((((((&)))))))))))
C12C8.1.1	1708	1726	PAO_13088	1	22	-9.93	AGGCUCUCGAAGAACAUGG&CCGGGGCUUCGAUCAAGAGCUU	((((((((((((..(.(((&))))..)))))....)))))))
C14C10.3a.1	1288	1321	PAO_13088	2	22	-9.91	GAGCUCUACGCGUUUGCAAUUCAGAAAAGCCCCG&CGGGGCUUCGAUCAAGAGCUU	(((((((....(.(((..........((((((((&))))))))))).).)))))))
Y38F1A.6.1	694	714	PAO_13088	3	20	-9.74	GCUCCCAUUGAUCGCUGUGCC&GGGGCUUCGAUCAAGAGC	((((...(((((((..((.((&)).))..)))))))))))
C01A2.4.1	24	42	PAO_13088	4	23	-9.71	GAACAUUUUCUCGAAGCCC&GGGCUUCGAUCAAGAGCUUC	(((..((((.(((((((((&)))))))))..))))..)))
F08A8.3.1	1963	1992	PAO_13088	2	23	-9.68	GAAGCCUAUGAUGGAAAAGGCGAAGCUUUG&CGGGGCUUCGAUCAAGAGCUUC	(((((((.((((........((((((((((&)))))))))))))))).)))))
F42E11.1a.1	652	665	PAO_13088	1	14	-9.68	GAUCGGAGUUUUGG&CCGGGGCUUCGAUC	((((((((((((((&))))))))))))))
C37H5.13a.1	879	901	PAO_13088	1	23	-9.64	GUUGCCAAUGCCCGAGGUUCCGG&CCGGGGCUUCGAUCAAGAGCUUC	(..((...((..(((((((((((&)))))))))))..))...))..)
C54G6.5.1	184	201	PAO_13088	3	19	-9.63	CUGCUUGAAGGAGGUCCC&GGGGCUUCGAUCAAGAG	((.(((((..((((((((&))))))))..)))))))
F57B10.3a.1	117	131	PAO_13088	1	15	-9.55	UGUUCGUAGCCCUGG&CCGGGGCUUCGAUCA	((.(((.((((((((&)))))))).))).))
K09F6.10.1	2229	2245	PAO_13088	3	21	-9.48	GGCUCUUCAUCUUCCUC&GGGGCUUCGAUCAAGAGCU	(((((((.(((..((((&))))....))).)))))))
C47E12.4d.4	30	52	PAO_13088	3	21	-9.36	GGCUCUUUUGCGGUCGUUGUUUC&GGGGCUUCGAUCAAGAGCU	(((((((....(((((..(((((&)))))..))))))))))))
R12E2.11.1	199	219	PAO_13088	2	22	-9.34	GAGCUCUCCUCGUGUGCUCCG&CGGGGCUUCGAUCAAGAGCUU	(((((((..(((...((((((&))))))..)))...)))))))
F41C3.5.1	596	616	PAO_13088	3	23	-9.3	GAAGCUUAACAUUGAUACCUC&GGGGCUUCGAUCAAGAGCUUC	(((((((...(((((..((((&))))..)))))...)))))))
K10D2.6.1	977	995	PAO_13088	3	21	-9.22	AGUUCUUGUUGAUCGUCUC&GGGGCUUCGAUCAAGAGCU	((((((((((((..(((((&))))).)))).))))))))
F28C10.3.1	451	470	PAO_13088	3	22	-9.21	GAGUGUUUGAUCGAGGAAUC&GGGGCUUCGAUCAAGAGCUU	((((..((((((((((..((&))..))))))))))..))))
C54G7.2.1	1248	1265	PAO_13088	3	20	-9.19	GCUCUUGCCUACGCCACC&GGGGCUUCGAUCAAGAGC	(((((((.....(((.((&)))))......)))))))
Y22D7AL.5a.1	767	793	PAO_13088	2	21	-9.17	GGCUCUUGAGCUCGCCAACAAGCUCCG&CGGGGCUUCGAUCAAGAGCU	(((((((((..(((.....((((((((&))))))))))))))))))))
B0285.4.1	25	40	PAO_13088	2	23	-9.16	GAAGCUGUAAGCUCCG&CGGGGCUUCGAUCAAGAGCUUC	((((((.(((((((((&))))))))......).))))))
C36A4.2.1	496	524	PAO_13088	1	23	-9.09	GAUAUUUUGAGAGAAAAAGCCAGCUCCGG&CCGGGGCUUCGAUCAAGAGCUUC	((..((((((..((.......((((((((&))))))))))..))))))...))
F27D4.1.1	732	754	PAO_13088	2	23	-9.09	GGAGCCGGAGUCGGAGCAUCCCG&CGGGGCUUCGAUCAAGAGCUUC	((((((...((((((((..((((&))))))))))))...).)))))
F28F8.2.1	1815	1831	PAO_13088	1	22	-9.08	GAGCUGUUGGGUCUCGG&CCGGGGCUUCGAUCAAGAGCUU	(((((.(((((((((((&)))))))).....))).)))))
K08E5.1b.1	713	726	PAO_13088	3	15	-9.05	UGAGAAGAAGUCCC&GGGGCUUCGAUCA	(((...((((((((&))))))))..)))
C12D5.7.1	1245	1273	PAO_13088	3	23	-9.02	GAAGCUCAACGAUGUGCCAAUCUAGUCCC&GGGGCUUCGAUCAAGAGCUUC	(((((((...(((..........((((((&))))))...)))..)))))))
K01C8.10.1	285	304	PAO_13088	5	22	-8.99	AAGCUCAAGAUAUCGAAGCU&GGCUUCGAUCAAGAGCUU	((((((..((..((((((((&))))))))))..))))))
M02F4.8.1	337	356	PAO_13088	3	20	-8.92	GCUCUUGGAUCUGCUGCCGC&GGGGCUUCGAUCAAGAGC	(((((((.(((.(..(((.(&).)))..)))))))))))
F14F7.3.1	885	911	PAO_13088	3	22	-8.83	AAGCUGGAAUUGAUCCAGGAGAGCCCC&GGGGCUUCGAUCAAGAGCUU	(((((....((((((.....(((((((&))))))).)))))).)))))
F26D10.9a.1	1520	1544	PAO_13088	2	23	-8.8	GAGGCUCUGAUUGUUGGAGAAACCG&CGGGGCUUCGAUCAAGAGCUUC	((((((((....(((((((...(((&)))..)))))))..))))))))
C07G3.2.1	419	432	PAO_13088	3	17	-8.77	CUUGUGGAGGCCUC&GGGGCUUCGAUCAAG	(((((.((((((((&)))))))).).))))
F14F9.4.1	2092	2111	PAO_13088	2	21	-8.76	GGCUCUUGAGAUAUGCCGUG&CGGGGCUUCGAUCAAGAGCU	(((((((((.....(((.((&)).))).....)))))))))
K11C4.4.1	1042	1060	PAO_13088	3	23	-8.76	GAUGCUCUUGAUGAGUUCU&GGGGCUUCGAUCAAGAGCUUC	((.((((((((((((((((&)))))))..))))))))).))
ZK632.3.1	1242	1265	PAO_13088	3	22	-8.74	AAGUUCACGUGAUCGAUGUGUCUC&GGGGCUUCGAUCAAGAGCUU	((((((...(((((((...(((((&))))).))))))).))))))
F43E2.3a.1	737	757	PAO_13088	1	19	-8.7	CUCUUCUUUCUUCAGCUCUGG&CCGGGGCUUCGAUCAAGAG	(((((...((...((((((((&))))))))..))..)))))
F53A2.7.1	439	466	PAO_13088	1	23	-8.7	GAAGUACGAAUUCGAAGAUAUGCUCUGG&CCGGGGCUUCGAUCAAGAGCUUC	(((((.(....(((((.....(((((((&))))))))))))....).)))))
R08F11.1a.1	1176	1195	PAO_13088	3	20	-8.7	GCUUAAUGACCAGAAGCUCC&GGGGCUUCGAUCAAGAGC	((((..(((...((((((((&))))))))..))).))))
ZK617.2.1	750	772	PAO_13088	1	21	-8.64	GGCUUGUGGAAAGAAGGCUUCGG&CCGGGGCUUCGAUCAAGAGCU	(((((.(((...(((.(((((((&))))))))))..))).)))))
C16A3.7.1	2515	2531	PAO_13088	9	23	-8.59	GAAGCUCUUGAAGUUGA&UCGAUCAAGAGCUUC	(((((((((((..((((&)))))))))))))))
R53.4.1	485	498	PAO_13088	3	19	-8.56	CUCUUCAAAGCUCC&GGGGCUUCGAUCAAGAG	((((((.(((((((&))))))).))...))))
K08E7.9.1	3405	3426	PAO_13088	2	22	-8.55	GAGAUCUUUAUCGAUGGCUCCG&CGGGGCUUCGAUCAAGAGCUU	(((.((((.(((((.(((((((&)))))))))))).)))).)))
B0205.6.1	743	758	PAO_13088	4	20	-8.52	GUUCGUAUUGAAGCUC&GGGCUUCGAUCAAGAGC	((((..((((((((((&))))))))))...))))
Y105E8A.4.1	430	441	PAO_13088	1	11	-8.51	CGAUGGCCCCGG&CCGGGGCUUCG	(((.((((((((&)))))))))))
Y48G8AL.5a.1	557	581	PAO_13088	1	20	-8.51	GUGCUUGAUUUGUGUGCGGCUCCGG&CCGGGGCUUCGAUCAAGAGC	((.(((((((.....(.((((((((&)))))))).)))))))).))
C05D11.11a.1	311	329	PAO_13088	1	22	-8.45	GAGCUCUUGAGGUAUUCGG&CCGGGGCUUCGAUCAAGAGCUU	(((((((((((((.(((((&))))))))....))))))))))
B0272.3.1	520	539	PAO_13088	4	23	-8.44	GAAGCUUUUGGAAGUUGUUC&GGGCUUCGAUCAAGAGCUUC	(((((((((((..(..((((&))))..)..)))))))))))
Y54F10AM.5.1	433	455	PAO_13088	1	21	-8.36	GGCUCCAGAGGUGAAGCUCCGUG&CCGGGGCUUCGAUCAAGAGCU	(((((..((..((((((((((.(&))))))))))).))..)))))
K07C5.4.1	615	634	PAO_13088	3	22	-8.28	GAGCUCUUCCGUCUGGCUCC&GGGGCUUCGAUCAAGAGCUU	((((((((..(((.((((((&))))))..))).))))))))
C10H11.6a.1	1167	1188	PAO_13088	1	21	-8.27	AGCUCUUCUCAAUGACCCUCGG&CCGGGGCUUCGAUCAAGAGCU	(((((((.((...((.((((((&)))))).)).))..)))))))
C46F4.2.1	1949	1962	PAO_13088	7	23	-8.23	GAAGCUCUGCGAAG&CUUCGAUCAAGAGCUUC	((((((((((((((&)))))..)).)))))))
K07E3.8.1	23	40	PAO_13088	4	21	-8.21	AGCUCUUGGUUUGAAUUC&GGGCUUCGAUCAAGAGCU	(((((((((((.((((((&))).))))))))))))))
F49E12.9a.1	971	989	PAO_13088	1	19	-8.16	UUCUUGAUUGGAUUCACGG&CCGGGGCUUCGAUCAAGAG	(((((((((((((((.(((&)))))).))))))))))))
C23H5.8b.1	893	913	PAO_13088	1	19	-8.14	UUCUUGGUUGAGGACGCCUGG&CCGGGGCUUCGAUCAAGAG	(((((((((((((.(.(((((&)))))))))))))))))))
F55F8.5.1	318	337	PAO_13088	3	20	-8.11	GUAAUUGGAAUUGAAGCUCC&GGGGCUUCGAUCAAGAGC	((..(((..(((((((((((&))))))))))))))..))
R05D8.8.1	800	821	PAO_13088	3	20	-8.09	GUUCUUGGCUGAUCGAAAACUC&GGGGCUUCGAUCAAGAGC	(((((....((((((((..(((&)))..)))))))))))))
F14H8.6b.1	2191	2211	PAO_13088	2	23	-8.08	GAGGCUCUUCAUGAAUAUCCG&CGGGGCUUCGAUCAAGAGCUUC	(((((((((.(((((..((((&))))..))).)).)))))))))
F40F4.4a.1	358	381	PAO_13088	3	20	-8.06	GCUCUUGCGACCAAUCGAUUCUUC&GGGGCUUCGAUCAAGAGC	(((((((......(((((..((((&))))..))))))))))))
K11D12.3a.1	1181	1195	PAO_13088	4	19	-8.05	CUCUUGAUGAUGCUC&GGGCUUCGAUCAAGAG	((((((((((.((((&)))).)).))))))))
C35B1.2a.1	1628	1649	PAO_13088	1	23	-8.03	GAAGCUUGGCUGGAAUCGUCGG&CCGGGGCUUCGAUCAAGAGCUUC	(((((((.(.(.(((.(.((((&)))).).))).).)..)))))))
Y51A2D.9a.1	439	467	PAO_13088	3	23	-8.03	GAAGCUCAACUUUUCGACAUCGGAACCCU&GGGGCUUCGAUCAAGAGCUUC	(((((((.....((.((..(((((.((((&)))).))))))))))))))))
C15H11.3.1	79	105	PAO_13089	2	25	-21.29	ACCCAGACACUCAAAGCAGAUAUGAAG&UUUCGUGUUUGCAGAGUGCUGUGU	((.(((.(((((...((((((((((((&)))))))))))).)))))))).))
Y38F1A.6.1	1531	1547	PAO_13089	2	22	-21.26	CAGCACUCUGUACGAGA&UUUCGUGUUUGCAGAGUGCUG	(((((((((((((((((&))))))....)))))))))))
F22E10.3.1	3353	3369	PAO_13089	7	23	-21.04	ACAGCACUUCGCGGACA&UGUUUGCAGAGUGCUGU	(((((((((.(((((((&))))))).)))))))))
R03D7.1.1	1479	1499	PAO_13089	3	23	-20.7	AGGGCAAGCUGCGGAGACGGA&UUCGUGUUUGCAGAGUGCUGU	(.((((..(((((((.(((((&))))).)))))))..)))).)
F28C10.3.1	786	810	PAO_13089	1	23	-20.43	AGAGUACUCUGAUAGCACUGCAAAG&CUUUCGUGUUUGCAGAGUGCUGU	(.(((((((((..(((((.(.((((&))))))))))..))))))))).)
K08E7.9.1	2026	2047	PAO_13089	1	25	-20.17	GCCAGACCAGCGAACAUGAAGG&CUUUCGUGUUUGCAGAGUGCUGUGU	((((((((.(((((((((((((&))))))))))))).).)).))).))
F08A8.3.1	496	519	PAO_13089	6	24	-19.77	CACAGCCACCUACUCCCCGGACAC&GUGUUUGCAGAGUGCUGUG	((((((.....((((..(((((((&)))))))..))))))))))
C36A4.2.1	365	387	PAO_13089	5	25	-19.46	ACCAGUCUCUGCUCCAAAACACG&CGUGUUUGCAGAGUGCUGUGU	((((((((((((....(((((((&))))))))))))).)))).))
K01D12.10.1	341	362	PAO_13089	1	23	-19.36	GCAGCACAAGCGGAUCCGGAAG&CUUUCGUGUUUGCAGAGUGCUGU	(((((((..((((((.((((((&)))))).))))))...)))))))
C27B7.1b.1	553	570	PAO_13089	7	25	-19.27	ACGCAGCACUACCAGACA&UGUUUGCAGAGUGCUGUGU	((((((((((..((((((&))))))...))))))))))
R11A5.4a.1	2	20	PAO_13089	5	24	-19.26	CACACCACCAUCGAGCACG&CGUGUUUGCAGAGUGCUGUG	((((.((((..((((((((&))))))))..).))).))))
C25A1.7.1	24	46	PAO_13089	4	23	-19.09	GCAGCCGCUUUGCAAGCCCUCGA&UCGUGUUUGCAGAGUGCUGU	(((((.(((((((((((...(((&))).))))))))))))))))
C49G7.3.1	681	703	PAO_13089	1	25	-18.69	GCACAGCUUGUGCAGCAUGGAAG&CUUUCGUGUUUGCAGAGUGCUGUGU	(((((((((.(((((((((((((&)))))))).))))).)).)))))))
F53C3.6a.1	386	405	PAO_13089	6	25	-18.63	GCAGGGCAUCAUGUGAAUAC&GUGUUUGCAGAGUGCUGUGU	(((.(((((..(((((((((&)))))))))..))))).)))
Y22D7AL.5a.1	1335	1356	PAO_13089	1	23	-18.53	ACAGCACUCAAAAACUACAAAG&CUUUCGUGUUUGCAGAGUGCUGU	(((((((((..((((.((((((&)))).))))))...)))))))))
Y73C8C.2.1	1039	1061	PAO_13089	1	25	-18.37	ACACACACUGCUGCCAACGAGGG&CUUUCGUGUUUGCAGAGUGCUGUGU	(((((((((.((((..(((((((&)))))))....)))))))).)))))
C34C12.8.1	251	274	PAO_13089	1	25	-18.11	AUACGACGAUUUGCAGGCCGAAAG&CUUUCGUGUUUGCAGAGUGCUGUGU	(((((.((.(((((((((((((((&)))))).))))))))).)).)))))
C47E12.4c.1	222	242	PAO_13089	6	25	-18.01	ACACAGGUUUCUGCGAUUCAC&GUGUUUGCAGAGUGCUGUGU	((((((..((((((((..(((&))).))))))))..))))))
C01A2.4.1	378	397	PAO_13089	1	21	-17.96	AGUUGCCGCAAAUAUGAGAG&CUUUCGUGUUUGCAGAGUGCU	(((..(.(((((((((((((&))))))))))))).)...)))
ZC97.1a.1	397	413	PAO_13089	4	20	-17.94	GUACUCUGGAACCACGA&UCGUGUUUGCAGAGUGC	((((((((.((.(((((&))))).)).))))))))
C17G10.8.1	600	620	PAO_13089	6	25	-17.87	ACAUGGUAUUGCUGUGAACGC&GUGUUUGCAGAGUGCUGUGU	((((((((((.((((((((((&))))))))))))))))))))
M117.2a.2	861	885	PAO_13089	1	25	-17.81	ACACUGCGCAAUAGCAUCAUGAAAG&CUUUCGUGUUUGCAGAGUGCUGUGU	((((.((((..(.(((.((((((((&))))))))..))))..)))).))))
K11G9.1.1	1444	1466	PAO_13089	2	24	-17.57	CGCUAACUUUGCCAAAUACGGAA&UUUCGUGUUUGCAGAGUGCUGUG	(((..(((((((.((((((((((&)))))))))))))))))...)))
F08H9.6.1	464	483	PAO_13089	4	25	-17.56	GCCAGCGUUUUGCAAACAGA&UCGUGUUUGCAGAGUGCUGUGU	((((((((((((((((((((&)).)))))))))))))))).))
Y105E8A.4.1	489	511	PAO_13089	1	25	-17.47	ACUAGGCGCUCAGGAGGCGAAGG&CUUUCGUGUUUGCAGAGUGCUGUGU	((..(((((((.(((.(((((((&))))))).)))...)))))))..))
Y50E8A.16.1	606	627	PAO_13089	6	25	-17.47	AUACUGAAACUGCUGCGAACAC&GUGUUUGCAGAGUGCUGUGU	((((....(((.((((((((((&)))))))))))))...))))
F15E6.6.1	2637	2664	PAO_13089	1	25	-17.46	GCGCGGGAAGUUGGGAAGAGCACGGAGG&CUUUCGUGUUUGCAGAGUGCUGUGU	((((((.(..(((.((...(((((((((&))))))))))).)))..).))))))
F43C1.7.1	341	359	PAO_13089	1	21	-17.45	AGGAAUGCAGACAGGAGAG&CUUUCGUGUUUGCAGAGUGCU	((.(.((((((((.(((((&))))).))))))))...).))
F28F8.2.1	521	541	PAO_13089	6	25	-17.32	GCACAGCAACUAUGUUCACAC&GUGUUUGCAGAGUGCUGUGU	((((((((.((.(((..((((&))))..))).))))))))))
DC2.5a.1	389	411	PAO_13089	2	25	-17.27	AUGCAGCAUCUGAAACAUUGAAA&UUUCGUGUUUGCAGAGUGCUGUGU	(((((((((((((((((.(((((&)))))))))).)))).))))))))
M88.1.1	1104	1129	PAO_13089	1	25	-17.25	ACUAAAGCAUUCAUUACUCACGGAGG&CUUUCGUGUUUGCAGAGUGCUGUGU	((...(((((((..((..((((((((&))))))))..))..)))))))..))
F58B3.6.1	1042	1069	PAO_13089	1	25	-17.09	ACACAACAUGCGAUUUGCUUCACGGAGG&CUUUCGUGUUUGCAGAGUGCUGUGU	(((((....(((.(((((..((((((((&))))))))...))))).))))))))
C16A3.7.1	2208	2223	PAO_13089	6	21	-17.06	AGAGCUUUGCGAACAU&GUGUUUGCAGAGUGCU	((.(((((((((((((&))))))))))))).))
F44C4.3.1	466	485	PAO_13089	3	20	-17.04	GCUCCAACUGCGGAUACGGA&UUCGUGUUUGCAGAGUGC	((.(...(((((((((((((&))))))))))))).).))
F27D4.1.1	67	94	PAO_13089	4	23	-17.02	ACAGCACUCUUGUUGUCGCCGAGCACGA&UCGUGUUUGCAGAGUGCUGU	((((((((((.......((.((((((((&))))))))))))))))))))
F44G3.2.1	956	974	PAO_13089	6	25	-17.02	ACUCAGCGCUCGUGAAGAC&GUGUUUGCAGAGUGCUGUGU	((.(((((((((((((.((&)).))))).)))))))).))
C01G6.6a.1	1229	1249	PAO_13089	1	23	-16.91	GCAGUGCUCAGGGAAUGAAGG&CUUUCGUGUUUGCAGAGUGCUGU	(((((((((.(.(((((((((&)))))..)))).).)))))))))
H12C20.3a.1	891	910	PAO_13089	6	23	-16.84	GCAGCAUUUAAAGCAAUCAC&GUGUUUGCAGAGUGCUGU	(((((((((...((((.(((&))).)))).)))))))))
F44A6.5.1	39	59	PAO_13089	6	25	-16.73	GCUCAGCGCUCAGCAGAAAAC&GUGUUUGCAGAGUGCUGUGU	((.((((((((.(((((..((&)).))))).)))))))).))
C31C9.1a.1	549	564	PAO_13089	6	21	-16.71	AGCAUCUCUGCAAUAC&GUGUUUGCAGAGUGCU	((((.(((((((((((&))).))))))))))))
Y53G8B.2.1	631	656	PAO_13089	1	25	-16.71	ACACACUCACUUUGGCAUCAAGAAAG&CUUUCGUGUUUGCAGAGUGCUGUGU	(((((..(((((((.((.((.(((((&))))).))..))))))))).)))))
K06A5.6.2	96	113	PAO_13089	2	19	-16.67	UACUUUGCGAAAUCGAAA&UUUCGUGUUUGCAGAGUG	(((((((((((..(((((&)))))..)))))))))))
F14F7.3.1	1314	1340	PAO_13089	3	25	-16.66	GCACAAAUAUUCUUUGCGACACAUGGA&UUCGUGUUUGCAGAGUGCUGUGU	(((((......((((((((.(((((((&)))))))))))))))...)))))
C54G6.5.1	203	220	PAO_13089	6	23	-16.6	ACGCACUCUGCUGAGCAC&GUGUUUGCAGAGUGCUGU	(((((((((((.((((((&))))))))))))))).))
ZK896.5.1	268	286	PAO_13089	6	25	-16.54	ACACAGUCAUCUCUAACAC&GUGUUUGCAGAGUGCUGUGU	(((((((..((((.(((((&))))).).)))..)))))))
C45B11.3.1	349	371	PAO_13089	2	25	-16.51	ACACAGAAGAUACAGACAUGAAA&UUUCGUGUUUGCAGAGUGCUGUGU	((((((......(((((((((((&))))))))))).......))))))
Y58A7A.5.1	334	352	PAO_13089	2	20	-16.5	GUACUCUGUCAACAAGAAA&UUUCGUGUUUGCAGAGUGC	(((((((((.((((.((((&)))).)))).)))))))))
F56C11.6a.1	255	273	PAO_13089	6	24	-16.48	UAGGGCAGUUUGUGAACAC&GUGUUUGCAGAGUGCUGUG	((.((((.(((((((((((&))))))))))).)))).))
F10E7.8a.1	2659	2686	PAO_13089	1	23	-16.44	ACAGUUUGAUCAAAGCAAGCAUCGAAAG&CUUUCGUGUUUGCAGAGUGCUGU	(((((....((...(((((((.((((((&))))))))))))).))..)))))
ZC155.1.1	749	776	PAO_13089	1	25	-16.35	GCUCAGCAGCUCCACGCUUCCAUGAAAG&CUUUCGUGUUUGCAGAGUGCUGUGU	((.(((((.(((...((...((((((((&))))))))...)).)))))))).))
K12G11.3.1	388	408	PAO_13089	6	24	-16.33	CACGAGCCACUCUGCCACCAC&GUGUUUGCAGAGUGCUGUG	(((.(((.(((((((.(.(((&))).).)))))))))))))
C05C10.3.1	1499	1521	PAO_13089	2	25	-16.31	ACUCACCGCUUGCAAAUUCGAAA&UUUCGUGUUUGCAGAGUGCUGUGU	((.((.(((((((((((.(((((&))))).))))))).)))).)).))
F02A9.4.1	963	992	PAO_13089	3	25	-16.11	ACAGAAGUGCUCUCCAGGAACAAACACGAA&UUCGUGUUUGCAGAGUGCUGUGU	(((..((((((((.......((((((((((&)))))))))).)))))))).)))
C46F4.2.1	1231	1258	PAO_13089	1	21	-16.1	AGCAACUCUUCAAAACUUGUUACGAAAG&CUUUCGUGUUUGCAGAGUGCU	((((.((((.((((......((((((((&)))))))))))).))))))))
Y82E9BR.18.1	1791	1812	PAO_13089	6	24	-16.1	UACAGCACCUACCGGCGAAUAC&GUGUUUGCAGAGUGCUGUG	((((((((((....((((((((&)))))))))).))))))))
C05E4.9a.1	2516	2542	PAO_13089	1	25	-16.05	ACGAGAGGCCACUGACGGACACGAUGG&CUUUCGUGUUUGCAGAGUGCUGUGU	(((...((((.(((.(((((((((.((&)).)))))))))))).).))).)))
F54D7.7.1	27	45	PAO_13089	1	21	-16.01	AGCAGGUCAAACAUGAGAG&CUUUCGUGUUUGCAGAGUGCU	((((..(((((((((((((&)))))))))))).)...))))
F59A2.3.1	657	675	PAO_13089	5	24	-15.99	UACGAGCACUCUCAAUACG&CGUGUUUGCAGAGUGCUGUG	(((.(((((((((((((((&)))))).).)))))))))))
E04A4.4a.1	2099	2114	PAO_13089	2	17	-15.98	CUCUGGAGAUACGAAA&UUUCGUGUUUGCAGAG	(((((.((((((((((&)))))))))).)))))
F42E11.1a.1	1757	1779	PAO_13089	1	25	-15.78	ACUAGUGCUCUGGAUACUGAAAG&CUUUCGUGUUUGCAGAGUGCUGUGU	((((((((((((.(.((((((((&)))))).)).).)))))))))).))
R08F11.1a.1	1869	1893	PAO_13089	3	24	-15.74	CGCGGCGCUCUCCUCCUACAUCGAA&UUCGUGUUUGCAGAGUGCUGUG	(((((((((((.(....(((.((((&)))))))..).)))))))))))
F18E3.7a.1	642	665	PAO_13089	2	25	-15.73	GCACAAGCACUUCAAUUAUCGAGA&UUUCGUGUUUGCAGAGUGCUGUGU	((((.((((((((((.((.(((((&))))))).)))..)))))))))))
F11C1.5a.1	2126	2158	PAO_13089	1	23	-15.68	GCAGCACGACGAAAUUCUAGAGGACAUGGCAAG&CUUUCGUGUUUGCAGAGUGCUGU	(((((((........(((.(.((((((((.(((&))))))))))).)))))))))))
C37A5.1.1	1229	1243	PAO_13089	6	19	-15.63	CACUCUGUGCAACAC&GUGUUUGCAGAGUG	(((((((((.(((((&))))))))))))))
C47A10.1.1	1025	1042	PAO_13089	6	23	-15.61	ACAGCAAUUUGCAACCAU&GUGUUUGCAGAGUGCUGU	((((((.(((((((.(((&))).))))))).))))))
F57B10.3a.1	1474	1492	PAO_13089	3	21	-15.57	AGCAACUCAAAAGCACGGA&UUCGUGUUUGCAGAGUGCU	((((.(((..(((((((((&)))))))))...)))))))
D2096.8.1	754	766	PAO_13089	1	13	-15.56	GCAAGGACGAGAG&CUUUCGUGUUUGC	(((((.(((((((&))))))).)))))
C14C10.3a.1	1993	2014	PAO_13089	1	25	-15.52	AUUCAGUGCUCUGACUCGAAAG&CUUUCGUGUUUGCAGAGUGCUGUGU	((.((((((((((((.((((((&)))))).))...)))))))))).))
C52E4.1.1	83	104	PAO_13089	5	24	-15.52	UACCGCGCUCUGCGCAGUCACG&CGUGUUUGCAGAGUGCUGUG	(((.((((((((((.((.((((&)))))))))))))))).)))
C12C8.1.1	1706	1727	PAO_13089	3	25	-15.5	GCAGGCUCUCGAAGAACAUGGA&UUCGUGUUUGCAGAGUGCUGUGU	((((((.(((...(((((((((&)))))))))...))).))).)))
F54D5.12.1	47	77	PAO_13089	1	25	-15.5	ACGCAGCAGUUCUUGCCGCCAGACAUGAAGG&CUUUCGUGUUUGCAGAGUGCUGUGU	((((((((.((((.((....(((((((((((&)))))))))))))))))))))))))
F44E7.8a.1	145	165	PAO_13089	6	24	-15.47	CACUCCAACUCGCACAGACAC&GUGUUUGCAGAGUGCUGUG	(((..((.(((...(((((((&)))))))..)))))..)))
C08F8.2b.1	178	202	PAO_13089	1	25	-15.39	ACACAAACAGCUGCGGGAAUGGGAG&CUUUCGUGUUUGCAGAGUGCUGUGU	(((((.....(((((((.(((((((&))))))).))))))).....)))))
F54A5.2a.1	930	947	PAO_13089	5	24	-15.38	CUCAGCAUUCUUCAACCG&CGUGUUUGCAGAGUGCUGUG	(.(((((((((.((((((&)).))).).))))))))).)
R04B5.6.1	299	317	PAO_13089	1	21	-15.21	AGCACUGCAAAAUUGGAAG&CUUUCGUGUUUGCAGAGUGCU	(((((((((((..((((((&))))))..)))))))..))))
R02E12.6.1	757	775	PAO_13089	6	24	-15.07	CAGAGUACUCUGUGACUAU&GUGUUUGCAGAGUGCUGUG	((.((((((((((((.(((&))).)))))))))))).))
B0285.4.1	377	397	PAO_13089	5	25	-15.03	GCGCGAAACUCGUCAAAUACG&CGUGUUUGCAGAGUGCUGUGU	(((((..((((..((((((((&))))))))..))))..)))))
C29F7.2a.1	1037	1052	PAO_13089	6	23	-15.02	ACGGCGCCGCACUCAC&GUGUUUGCAGAGUGCUGU	(((((((((((..(((&)))..))).).)))))))
F21F8.11.1	1547	1565	PAO_13089	6	25	-15.02	ACACAGCUAGGCCAAACGC&GUGUUUGCAGAGUGCUGUGU	(((((((...(.(((((((&)))))))).....)))))))
C06E7.1a.1	1000	1023	PAO_13089	1	22	-15	CGGGACAUCUGCGUUGAACGAAGG&CUUUCGUGUUUGCAGAGUGCUG	(((.((.((((((....(((((((&)))))))...)))))))).)))
F44C8.1.1	880	898	PAO_13089	6	25	-14.99	ACAAGCAACUCUCAAAUAC&GUGUUUGCAGAGUGCUGUGU	(((((((.(((((((((((&))))))).)))))))).)))
F14H8.6b.1	2279	2303	PAO_13089	1	25	-14.98	AUAUGGUAGAUGACGAGGAUGAAAG&CUUUCGUGUUUGCAGAGUGCUGUGU	((((((((..((.((((.(((((((&))))))).))))))...))))))))
F32D8.12b.1	257	276	PAO_13089	7	25	-14.97	GCAUAAGUACUCAACAGAUA&UGUUUGCAGAGUGCUGUGU	((((.(((((((..((((((&))))))..)))))))))))
Y50D4B.2a.1	417	425	PAO_13089	1	9	-14.95	GCACGAGAG&CUUUCGUGU	(((((((((&)))))))))
K01C8.10.1	1547	1568	PAO_13089	6	25	-14.91	GCAUCAGCUAUCAAGCAAGCAU&GUGUUUGCAGAGUGCUGUGU	(((.((((..((..((((((((&)))))))).))..)))))))
F14F9.3.1	2306	2326	PAO_13089	2	23	-14.88	AGGGUAUUUUGGAAACCGAAA&UUUCGUGUUUGCAGAGUGCUGU	(.(((((((((.(((((((((&))))).)))).))))))))).)
F57C12.4.1	129	154	PAO_13089	1	25	-14.88	GCAGCAGCAUUCCACAUGUCACAAAG&CUUUCGUGUUUGCAGAGUGCUGUGU	(((.((((((((..((...(((((((&)))).)))..))..)))))))))))
B0564.1a.1	717	739	PAO_13089	1	24	-14.73	CACAGUCAUGGAUGCAGCGAAAG&CUUUCGUGUUUGCAGAGUGCUGUG	(((((.(((...(((((((((((&)))))))...))))..))))))))
F56B3.5.1	59	79	PAO_13089	5	24	-14.67	UACAGCACCACCACAAACCCG&CGUGUUUGCAGAGUGCUGUG	((((((((..(..(((((.((&)).)))))..).))))))))
ZK632.3.1	511	526	PAO_13089	7	22	-14.64	CAGUACUUCACGAACA&UGUUUGCAGAGUGCUG	((((((((..((((((&))))))..))))))))
ZC376.7a.1	488	514	PAO_13089	1	24	-14.62	CAUCAGCAACAACAGCAGACAUGUCAG&CUUUCGUGUUUGCAGAGUGCUGUG	((.(((((....(.(((((((((..((&))..))))))))).)..)))))))
C06G3.1a.1	672	689	PAO_13089	7	24	-14.57	CACAAACUUUUGCAGACA&UGUUUGCAGAGUGCUGUG	((((.(((.(((((((((&))))))))))))..))))
B0457.6.1	263	283	PAO_13089	3	25	-14.56	GCGCAGCUUCUCGCUCACGAA&UUCGUGUUUGCAGAGUGCUGUGU	(((((((..(((((.((((((&))))))...)).))).)))))))
F09B12.3.1	1451	1469	PAO_13089	6	24	-14.55	CACCAUACUCUGCUGAAGC&GUGUUUGCAGAGUGCUGUG	(((..((((((((.((.((&)).)).))))))))..)))
F28A10.6.1	1122	1144	PAO_13089	1	23	-14.54	ACAGUACCUCCGCGACAUCCGAG&CUUUCGUGUUUGCAGAGUGCUGU	(((((((.((.(((((((..(((&)))..))))).)).)))))))))
C05A9.1a.1	3110	3131	PAO_13089	4	25	-14.49	GCUCAGCGCUCAGACAAAAUGA&UCGUGUUUGCAGAGUGCUGUGU	((.((((((((.(.((((((((&)))).))))).)))))))).))
F37B4.2.1	1069	1089	PAO_13089	2	21	-14.48	AGAAGCUUUGCGAUCAUGAAA&UUUCGUGUUUGCAGAGUGCU	((..(((((((((.(((((((&))))))).))))))))).))
C02A12.4.1	38	49	PAO_13089	12	23	-14.42	GCAGUACUCUGC&GCAGAGUGCUGU	((((((((((((&))))))))))))
Y71F9B.4.1	173	197	PAO_13089	2	24	-14.41	CUCGGCAUGACUGUCAUUCGCGGAA&UUUCGUGUUUGCAGAGUGCUGUG	(.((((((..(((.((..(((((((&)))))))..))))).)))))).)
C28C12.7b.1	661	679	PAO_13089	6	25	-14.4	ACUCAAGGCUCGCAAAUAU&GUGUUUGCAGAGUGCUGUGU	((.((..((((((((((((&)))))))).))))..)).))
K09A9.1.1	781	801	PAO_13089	1	21	-14.4	AGCGAACUCUGCAUAUCAAAG&CUUUCGUGUUUGCAGAGUGCU	(((..(((((((((((.((((&)))).)))..)))))))))))
R07E3.1a.1	287	307	PAO_13089	1	24	-14.4	UAGAGCACAUACCAACGAAAG&CUUUCGUGUUUGCAGAGUGCUGUG	((.(((((.(..(((((((((&)))))))...))..).))))).))
C55B7.4a.1	173	190	PAO_13089	6	23	-14.39	ACUCUUCUUUGCGGAUAC&GUGUUUGCAGAGUGCUGU	((....((((((((((((&))))))))))))....))
Y49C4A.8a.1	1592	1613	PAO_13089	1	22	-14.31	CAGUAUUCGUGACUCAUGGAGG&CUUUCGUGUUUGCAGAGUGCUG	((((((((((((..((((((((&)))))))).)))).))))))))
C07D10.2a.1	1138	1156	PAO_13089	3	25	-14.26	GCCAGCAAACGAGCACGAA&UUCGUGUUUGCAGAGUGCUGUGU	(((((((..((((((((((&)))))))))).....))))).))
D2023.2a.1	2496	2518	PAO_13089	1	24	-14.23	CAAAAUAUUCUGCAUACUGGGAG&CUUUCGUGUUUGCAGAGUGCUGUG	((...(((((((((.((((((((&)))))).)).)))))))))...))
F57B9.1.1	564	584	PAO_13089	2	21	-14.22	GGAGCUCAAGCAAUCACGAAA&UUUCGUGUUUGCAGAGUGCU	((.((((..((((.(((((((&))))))).)))).)))).))
C49A9.8.1	995	1021	PAO_13089	2	25	-14.21	ACACUACAUUUAUUUGGAAAUACGAAG&UUUCGUGUUUGCAGAGUGCUGUGU	((((..(((((...((.((((((((((&)))))))))).)))))))..))))
C12D8.11.1	1059	1079	PAO_13089	3	23	-14.19	GCAGCUAUCAAGAAACAUGGA&UUCGUGUUUGCAGAGUGCUGU	(((((..((...(((((((((&)))))))))...))..)))))
R07E5.2.1	345	365	PAO_13089	1	19	-14.19	CACUCCACGCAAGGACGGAGG&CUUUCGUGUUUGCAGAGUG	(((((...(((((.(((((((&))))))).))))).)))))
C12D5.7.1	446	468	PAO_13089	4	25	-14.18	ACACAGCUACUUAGACAAAAUGA&UCGUGUUUGCAGAGUGCUGUGU	(((((((.((((.(.((((((((&)))).))))).)))))))))))
F07F6.8.1	139	154	PAO_13089	6	23	-14.12	ACAGCAUUGCGUACAC&GUGUUUGCAGAGUGCUGU	(((((((((((.((((&)))).))))..)))))))
B0361.8.1	234	258	PAO_13089	1	24	-14.11	CACAAGUAUUUUGUAUAUUCCGGAG&CUUUCGUGUUUGCAGAGUGCUGUG	((((.((((((((((.((.(.((((&)))).).)).))))))))))))))
C23H5.8a.1	193	213	PAO_13089	5	25	-14.11	GCACUGGCAUUCUCGAGUACG&CGUGUUUGCAGAGUGCUGUGU	((((.((((((((((((((((&)))))))).))))))))))))
F43E2.3a.1	509	533	PAO_13089	6	25	-14.07	ACAUGAGCACUGACAGCGCAAAUAC&GUGUUUGCAGAGUGCUGUGU	((((.((((((......((((((((&))))))))..))))))))))
F40F4.4a.1	780	795	PAO_13089	5	25	-14.01	ACACAGCGCGGAGACG&CGUGUUUGCAGAGUGCUGUGU	((((((((((((.(((&))).))))).....)))))))
Y48G8AL.5a.1	2153	2175	PAO_13089	5	25	-13.98	ACACAGUUAUAAAUUCUGCUACG&CGUGUUUGCAGAGUGCUGUGU	(((((((.....(((((((((((&))))...))))))))))))))
C54G7.2.1	756	772	PAO_13089	12	25	-13.95	ACACAACCGUACUUUGC&GCAGAGUGCUGUGU	(((((...(((((((((&))))))))))))))
W08D2.4a.1	908	921	PAO_13089	7	20	-13.91	GCAUUCUGGGAGCA&UGUUUGCAGAGUGC	((((((((.(((((&))))).))))))))
F59B1.8.1	1124	1143	PAO_13089	2	21	-13.88	GGCCGGCUGUUGACAUGAAA&UUUCGUGUUUGCAGAGUGCU	(((...((((.(((((((((&))))))))).))))...)))
D1005.3.1	1032	1050	PAO_13089	6	24	-13.87	CACGGCAUUCUCCCCCCAU&GUGUUUGCAGAGUGCUGUG	(((((((((((.(...(((&)))...).)))))))))))
E03H4.8.1	411	428	PAO_13089	6	23	-13.86	ACAGUAUGAUGCAAUUGC&GUGUUUGCAGAGUGCUGU	(((((((..(((((.(((&))).)))))..)))))))
F58F9.7.1	302	318	PAO_13089	9	24	-13.78	CAAGGCACAUCUGCAAG&UUUGCAGAGUGCUGUG	((.(((((.((((((((&))))))))))))).))
B0205.6.1	359	378	PAO_13089	8	24	-13.69	CAUAUUAUCACGCUGCAAAC&GUUUGCAGAGUGCUGUG	((((....(((.((((((((&)))))))).))).))))
C31E10.7.1	193	215	PAO_13089	1	24	-13.68	CACUGACGCUAGGCAUAUGAAGG&CUUUCGUGUUUGCAGAGUGCUGUG	(((.(.((((..(((((((((((&))))))))..)))..))))).)))
B0399.2.1	1699	1720	PAO_13089	1	21	-13.66	AGUAUUUGCGGUUUUAUGAGAG&CUUUCGUGUUUGCAGAGUGCU	(((((((((((...((((((((&)))))))).))))))).))))
M60.7.1	46	61	PAO_13089	7	23	-13.66	AGAGCACUUGCCGACA&UGUUUGCAGAGUGCUGU	(.(((((((((.((((&)))).)).))))))).)
C27H6.4c.2	959	985	PAO_13089	2	20	-13.65	GCAUUUUGUAUUAUAUAAAACAUGAAA&UUUCGUGUUUGCAGAGUGC	((((((((((........(((((((((&)))))))))))))))))))
F09E5.3.1	127	145	PAO_13089	3	21	-13.64	GGCCAUCAGCAAAUACGAG&UUCGUGUUUGCAGAGUGCU	(((..((.(((((((((((&))))))))))).))..)))
F41B5.4.1	1061	1079	PAO_13089	6	25	-13.51	ACAAGCAACUCUCGAAUAC&GUGUUUGCAGAGUGCUGUGU	(((((((.(((((((((((&))))))).)))))))).)))
C55A6.5.1	651	661	PAO_13089	15	25	-13.5	AUGCAGCACUC&GAGUGCUGUGU	(((((((((((&)))))))))))
F09F3.6.1	713	736	PAO_13089	6	25	-13.43	ACACAGUUCUCACUUUUUUGACAU&GUGUUUGCAGAGUGCUGUGU	(((((((....(((((...(((((&)))))...))))))))))))
F54D11.1.1	1393	1402	PAO_13089	1	10	-13.43	AACGCGAAAG&CUUUCGUGUU	((((((((((&))))))))))
C52G5.2.1	390	413	PAO_13089	2	23	-13.42	ACGCCACUUUGAUGACUACAGGAA&UUUCGUGUUUGCAGAGUGCUGU	(((.(((((((..(((.((.((((&)))))))))..))))))).)))
W02F12.2.1	885	903	PAO_13089	1	23	-13.42	ACGCAUUCUACACAGGAAG&CUUUCGUGUUUGCAGAGUGCUGU	(((((((((((((.(((((&)))))))))....))))))).))
D2063.1.1	603	626	PAO_13089	3	25	-13.39	ACGCAAGAGCUAUGGGAAUGCGAG&UUCGUGUUUGCAGAGUGCUGUGU	(((((.(.(((.((.(((((((((&))))))))).)).))).))))))
C14A4.14.1	1030	1050	PAO_13089	2	23	-13.29	GGAGUACGAGUGGACAAGAGA&UUUCGUGUUUGCAGAGUGCUGU	(.(((((..(((((((.((((&)))).)))))))...))))).)
F54C1.7.1	344	360	PAO_13089	6	24	-13.25	UACACCGUUGCAAACAC&GUGUUUGCAGAGUGCUGUG	((((((.((((((((((&)))))))))).).).))))
Y46G5A.18a.2	89	115	PAO_13089	3	22	-13.25	CAGUCAUUUUCUCCUGUAAACCUCGAA&UUCGUGUUUGCAGAGUGCUG	(((.((((.....((((((((..((((&)))).)))))))))))))))
Y54F10AM.5.1	586	601	PAO_13089	6	20	-13.19	GUUUUUCUGCAAAUAC&GUGUUUGCAGAGUGC	((..((((((((((((&)))))))))))).))
K09F6.10.2	147	165	PAO_13089	6	24	-13.16	UACGGCAUUUUGAAAAUUC&GUGUUUGCAGAGUGCUGUG	((((((((((((.((((.(&).)))).))))))))))))
C27A7.5d.1	355	374	PAO_13089	4	22	-13.12	CAGCACUUCCAGAGUCACGA&UCGUGUUUGCAGAGUGCUG	((((((((...(((.(((((&))))))))...))))))))
F13C5.1.1	91	113	PAO_13089	5	25	-13.1	ACACAAAGUGCCUGUAAAAAACG&CGUGUUUGCAGAGUGCUGUGU	((((..((((((((((((..(((&))).))))))).)))))))))
K08D9.4b.1	292	313	PAO_13089	4	25	-13.05	ACUCAGAAGCUCUGUUAAACGA&UCGUGUUUGCAGAGUGCUGUGU	((.(((..(((((((...((((&))))....))))))).))).))
C05D11.11b.2	34	57	PAO_13089	6	23	-13	ACGGCACAAAAUGUUUGCAAGGAU&GUGUUUGCAGAGUGCUGU	(((((((......((((((((.((&)).)))))))))))))))
F08F3.7.1	1321	1344	PAO_13089	1	22	-13	UAGCAACUCAUAUGAACACAGAAG&CUUUCGUGUUUGCAGAGUGCUG	(((((.(((...(((((((.((((&)))).)))))))..))))))))
C30H6.7a.1	1054	1071	PAO_13089	8	24	-12.9	CAUAGCACCGAUGUACUC&GUUUGCAGAGUGCUGUG	((((((((...((((..(&)..))))..))))))))
C37H5.13a.1	401	421	PAO_13089	6	24	-12.89	CACAGCACGUCAGCUCGGCCC&GUGUUUGCAGAGUGCUGUG	((((((((.((.((..(((.(&).))).)).))))))))))
W09H1.5.1	303	326	PAO_13089	1	25	-12.89	ACCGGCGGUUGGUGGAAAUGAAGG&CUUUCGUGUUUGCAGAGUGCUGUGU	(((((((.((.(((((.(((((((&))))))).))))).)).))))).))
B0272.3.1	691	713	PAO_13089	1	25	-12.84	ACGCGGCGAUGCUUCCAUGGAAG&CUUUCGUGUUUGCAGAGUGCUGUGU	((((((((.(((...((((((((&))))))))...)))...))))))))
C01B12.3.1	577	597	PAO_13089	1	19	-12.84	CACUUUAGCGCGAGACGAAGG&CUUUCGUGUUUGCAGAGUG	((((((.(((.((.(((((((&))))))).)))))))))))
F41C3.5.1	567	584	PAO_13089	4	23	-12.82	AUGGCACUUGGAAAUGGA&UCGUGUUUGCAGAGUGCUGU	((((((((((.(((((((&)).))))).)).))))))))
Y37E3.9.1	575	593	PAO_13089	2	25	-12.82	GCACAGCAAGAAGCCGAAA&UUUCGUGUUUGCAGAGUGCUGUGU	((((((((..(((((((((&))))).))))......))))))))
ZK455.4.1	1561	1585	PAO_13089	1	23	-12.81	ACAUACUUUGCAAAUGUUACUGAAG&CUUUCGUGUUUGCAGAGUGCUGU	(((((((((((((((...((.((((&)))).)))))))))))))).)))
K11D12.3b.1	197	218	PAO_13089	2	24	-12.75	UACGGCUUGUGCGGCUGCGAAA&UUUCGUGUUUGCAGAGUGCUGUG	((((((((.(((((.(((((((&))))))).))))).)).))))))
Y51A2D.9b.1	195	215	PAO_13089	2	23	-12.75	AUGGAACUAUACGACACGAAA&UUUCGUGUUUGCAGAGUGCUGU	((((.(((....(((((((((&))))))))).....))).))))
C44B7.10.1	56	81	PAO_13089	1	23	-12.72	ACAGCUGGUAUCUUCAGAGAUGAAAG&CUUUCGUGUUUGCAGAGUGCUGU	(((((.....(((.((((.(((((((&))))))).)))).)))..)))))
F29G9.3.1	59	79	PAO_13089	4	23	-12.72	AUGGUACACUGCUUACCCCGA&UCGUGUUUGCAGAGUGCUGU	(((((((.((((..((..(((&))).))..)))).)))))))
K07C5.4.1	641	656	PAO_13089	12	25	-12.68	AUACAAGUACUCUCGC&GCAGAGUGCUGUGU	((((.((((((((.((&))))))))))))))
M04F3.4b.1	14	35	PAO_13089	4	23	-12.67	ACGGUACCAGGUCUCGACACGA&UCGUGUUUGCAGAGUGCUGU	(((((((...((...(((((((&))))))).))...)))))))
ZK617.2.1	1027	1048	PAO_13089	5	25	-12.6	ACAUCAGCACACAAGAAACAUG&CGUGUUUGCAGAGUGCUGUGU	(((.((((((.(...(((((((&)))))))...).)))))))))
F55F8.5.1	9	33	PAO_13089	1	23	-12.58	AUGGACUUGGCGGAUUUAAUGGAAG&CUUUCGUGUUUGCAGAGUGCUGU	((((((((.((((((...(((((((&))))))))))))).)))).))))
Y73F4A.2.1	313	333	PAO_13089	6	24	-12.53	CACUCAAUCUGGAACAAACAC&GUGUUUGCAGAGUGCUGUG	(((.((.((((...(((((((&))))))))))).))..)))
H06H21.6.1	225	255	PAO_13089	1	25	-12.42	ACGAAGAAUUCAAAUGAUUGCAAAACGAGAG&CUUUCGUGUUUGCAGAGUGCUGUGU	(((.((.((((.......(((((((((((((&))))))).)))))))))).)).)))
W07B8.5.1	617	636	PAO_13089	6	25	-12.36	ACCCAGUUCGGAUGCAAGCC&GUGUUUGCAGAGUGCUGUGU	((.((((.(...((((((((&).)))))))..).)))).))
F54D8.3a.1	796	813	PAO_13089	3	21	-12.34	GGCUGCUGCAGAAUCGAA&UUCGUGUUUGCAGAGUGCU	(((..(((((((..((((&))))..)))))))...)))
R151.9.1	189	199	PAO_13089	15	25	-12.34	AUACAGCUCUC&GAGUGCUGUGU	(((((((.(((&))).)))))))
ZK822.5a.1	1132	1155	PAO_13089	2	25	-12.32	GCAUGGCAGCGGCAAUUUAUGAAG&UUUCGUGUUUGCAGAGUGCUGUGU	((((((((.(.((((..(((((((&))))))).)))).)..))))))))
C35B1.1.1	489	514	PAO_13089	2	25	-12.31	ACGCAGUGCUCAAGGAUGACGUGGAA&UUUCGUGUUUGCAGAGUGCUGUGU	(((((((((((...(..(((((((((&)))))))))..).)))))))))))
F49E8.5.1	822	840	PAO_13089	6	20	-12.24	GUGCUUUCCCUGCAAACGC&GUGUUUGCAGAGUGC	(((((....((((((((((&)))))))))))))))
F53A2.7.1	499	518	PAO_13089	7	24	-12.24	CAUGGGACAGACUGCAGAGA&UGUUUGCAGAGUGCUGUG	(((((.((...(((((((.(&).))))))).)).)))))
ZK1320.4.1	1461	1470	PAO_13089	1	10	-12.24	GAUGCGAAGG&CUUUCGUGUU	((((((((((&))))))))))
Y57G11C.34.1	308	329	PAO_13089	1	23	-12.22	GCAGUACAAGGCAUGGGCAAAG&CUUUCGUGUUUGCAGAGUGCUGU	(((((((...(((.(.((((((&)))).)).).)))...)))))))
F52E4.5.1	717	739	PAO_13089	4	24	-12.19	UACAGUUCUCUUCCCCAAUACGG&UCGUGUUUGCAGAGUGCUGUG	((((((.((((.(...(((((((&))))))).).)))).))))))
Y60A3A.7.1	671	692	PAO_13089	4	25	-12.11	GCGCAGCUUCUGACUCUAUCGA&UCGUGUUUGCAGAGUGCUGUGU	((((((((((((.(.....(((&))).....)))))).)))))))
F49E12.9a.1	744	771	PAO_13089	2	24	-12.09	CACUAGCAUUUAUUGUCAUCCACUGGAA&UUUCGUGUUUGCAGAGUGCUGUG	(((.(((((((..((.((..(((.((((&)))))))..))))))))))))))
W01A8.1b.1	1555	1571	PAO_13089	6	25	-12.08	GCACAGUAAGCAGCCAC&GUGUUUGCAGAGUGCUGUGU	((((((((.((((.(((&))).))))....))))))))
K02F2.2.2	218	233	PAO_13089	3	20	-12.06	GCGCUCCAAGUACGGA&UUCGUGUUUGCAGAGUGC	((((((((((((((((&))))))))))..))))))
ZK697.14.1	690	711	PAO_13089	3	25	-12	ACUUGGCGCUGCUCAACACGGA&UUCGUGUUUGCAGAGUGCUGUGU	((.(((((((.(((((((((((&))))))).)).))))))))).))
C29F5.1.1	1028	1041	PAO_13089	5	19	-11.99	CACUUUGCAAGAUG&CGUGUUUGCAGAGUG	((((((((((((((&))).)))))))))))
C06H2.1.2	817	835	PAO_13089	2	17	-11.83	CUUUGCAAUUCGCGCGAAA&UUUCGUGUUUGCAGAG	((((((((...((((((((&))))))))))))))))
R12E2.11.1	609	625	PAO_13089	2	23	-11.8	ACGGCCUGAUCACGAAA&UUUCGUGUUUGCAGAGUGCUGU	((((((((..(((((((&)))))))....)))...)))))
VC5.5.1	884	914	PAO_13089	1	24	-11.61	CAAAGCAUCGAAAUCUGCCGGGCGAUGAGAG&CUUUCGUGUUUGCAGAGUGCUGUG	((.(((((.....(((((.((((.(((((((&))))))))))))))))))))).))
M02F4.8.1	864	886	PAO_13089	1	24	-11.52	CACCGACGCUUAAACACCAAAAG&CUUUCGUGUUUGCAGAGUGCUGUG	(((.(((.(((((((((..((((&)))).))))))).)).)).).)))
R53.4.1	182	207	PAO_13089	2	25	-11.49	AUACUGCCACUGGAGAUACUACGGAA&UUUCGUGUUUGCAGAGUGCUGUGU	((((.(((.(((.(((...(((((((&)))))))))).))).).)).))))
C14B1.3.1	851	872	PAO_13089	2	25	-11.42	AUAUAAAUCUGUAAAUAAGGAA&UUUCGUGUUUGCAGAGUGCUGUGU	(((((..((((((((((.((((&)))).))))))))))....)))))
F09F7.4b.2	32	59	PAO_13089	1	20	-11.41	GCACUCUUCCGCGGACUUCAUUCGAAGG&CUUUCGUGUUUGCAGAGUGC	(((((((...((((((......((((((&)))))).)))))))))))))
F22A3.6c.2	31	49	PAO_13089	1	24	-11.37	CACUGCAUCUGCAUGAGAG&CUUUCGUGUUUGCAGAGUGCUGUG	(((.(((((((((((((((&)))))))....))))).))).)))
F54B8.4a.1	102	119	PAO_13089	6	24	-11.35	UACAAACUCCUCAGAUGC&GUGUUUGCAGAGUGCUGUG	((((.((((..(((((((&)))))))..))))..))))
C52B9.7a.2	6	19	PAO_13089	6	20	-11.34	GUACUUUCAGAUAU&GUGUUUGCAGAGUGC	((((((((((((((&))))))).)))))))
C17C3.1a.1	548	568	PAO_13089	1	25	-11.3	ACGCAGUUCCAUACAUGAAGG&CUUUCGUGUUUGCAGAGUGCUGUGU	(((((((.(((.(((((((((&))))))))).))....).)))))))
DH11.2.1	552	567	PAO_13089	6	22	-11.23	CUUCGCUUUGCAAAAC&GUGUUUGCAGAGUGCUG	(..(((((((((((((&)).)))))))))))..)
F38E11.1.1	404	432	PAO_13089	1	25	-11.23	ACAUGGCUCACACAACCAAAGACGAUAAG&CUUUCGUGUUUGCAGAGUGCUGUGU	(((((((..((.(...((((.((((.(((&))))))).))))..).)))))))))
F12E12.11.1	325	340	PAO_13089	8	24	-11.21	CGGAGCAGCUGUAAAC&GUUUGCAGAGUGCUGUG	((.((((.((((((((&))))))))..)))).))
Y46H3D.6b.1	23	41	PAO_13089	5	23	-11.2	GGAGCGCUUUCAUAGCAUG&CGUGUUUGCAGAGUGCUGU	(.((((((((((.((((((&)))))))).)))))))).)
K02E11.10.1	326	340	PAO_13089	8	22	-11.12	CAGCAUUCGGUGGAC&GUUUGCAGAGUGCUG	((((((((.((((((&)))))).))))))))
F28A12.4.2	1200	1221	PAO_13089	6	25	-11.03	GCAUAGACUCUUUCAUAAAUAC&GUGUUUGCAGAGUGCUGUGU	(((((((((((....(((((((&))))))).))))).))))))
K08E5.1b.1	326	345	PAO_13089	1	24	-10.92	CAUUUCCUCUGCUGCGAAGG&CUUUCGUGUUUGCAGAGUGCUGUG	(((..(((((((((((((((&))))))))...)))))).)..)))
K10D2.6.1	120	143	PAO_13089	6	22	-10.89	CAGCAACCAUCGUCUAGCAGAUAC&GUGUUUGCAGAGUGCUG	(((((.(.....(((.((((((((&)))))))))))))))))
C06A8.1a.1	522	539	PAO_13089	6	23	-10.87	GCUGAUACUUUGAAACAU&GUGUUUGCAGAGUGCUGU	((.(.(((((((((((((&)))))).)))))))).))
C10H11.6a.1	1080	1101	PAO_13089	3	24	-10.87	CACAUUCAUCUGGAAAUAUGAA&UUCGUGUUUGCAGAGUGCUGUG	((((....((((.(((((((((&))))))))).))))....))))
F31D4.9.1	258	280	PAO_13089	2	23	-10.86	AUAGGACAACUUGUAGCGCGGAA&UUUCGUGUUUGCAGAGUGCUGU	((((.((...(((((((((((((&))))))).)))))).)).))))
F40E10.3.1	912	930	PAO_13089	1	21	-10.81	AGAACUCCGAGCACGCUGG&CUUUCGUGUUUGCAGAGUGCU	((.((((((((((((..((&))..))))))))..)))).))
F41G3.10.1	629	650	PAO_13089	6	25	-10.74	GCAUAUGCCACUUUGAUGAGAC&GUGUUUGCAGAGUGCUGUGU	(((((.(.(((((((..((.((&)).))..)))))))))))))
C01B10.11.1	843	867	PAO_13089	3	23	-10.7	GCAGUACAUAGAAGACAUACACGAG&UUCGUGUUUGCAGAGUGCUGU	(((((((......(.((.(((((((&))))))).)))...)))))))
Y73C8B.1.1	807	833	PAO_13089	6	24	-10.7	CGCGCAUUUUAAUUUCAAAGCGAACAU&GUGUUUGCAGAGUGCUGUG	((((((((((.........((((((((&))))))))))))))).)))
F26D10.9a.1	1463	1484	PAO_13089	4	25	-10.61	ACUGAAAACUCUGCUCUCAAGA&UCGUGUUUGCAGAGUGCUGUGU	((.....(((((((...((.((&)).))...))))))).....))
E02H1.3.1	289	304	PAO_13089	6	24	-10.57	CAUAUCAUGCAGGCAC&GUGUUUGCAGAGUGCUGUG	((((.(((((((((((&)))))))))...)).))))
W03G1.5.1	471	498	PAO_13089	1	24	-10.56	CGCAGCAGCAGCUCCUCAUUCUCGAAGG&CUUUCGUGUUUGCAGAGUGCUGUG	(((((((....(((..((..(.((((((&)))))).)..))..))))))))))
F16B4.9.1	255	272	PAO_13089	8	23	-10.51	ACAGAUAUCAAUGCAGAC&GUUUGCAGAGUGCUGU	((((.(((...(((((((&)))))))..)))))))
K11C4.4.1	1055	1070	PAO_13089	6	21	-10.48	AGUUCUUUCCAGACAC&GUGUUUGCAGAGUGCU	(((.((((.(((((((&))))))).)))).)))
Y54E10A.17a.1	370	392	PAO_13089	2	24	-10.4	CUCUCCACAUGCACAACAUGGAA&UUUCGUGUUUGCAGAGUGCUGUG	(.(..(((.((((.(((((((((&)))))))))))))..)))..).)
W02D3.5.1	69	77	PAO_13089	1	9	-10.35	ACAUGAAGG&CUUUCGUGU	(((((((((&)))))))))
M05D6.6.4	94	104	PAO_13089	6	17	-10.33	CUCUGCAUCAC&GUGUUUGCAGAG	(((((((.(((&)))..)))))))
K02A11.3.1	10	24	PAO_13089	6	20	-10.31	GUGCUCUGUGCUCAU&GUGUUUGCAGAGUGC	((((((((((..(((&)))..))))))))))
C15B12.8.1	166	187	PAO_13089	5	25	-10.2	GCACACACUGAUCCAGAAUAUG&CGUGUUUGCAGAGUGCUGUGU	(((((((((......(((((((&)))))))....)))).)))))
K07E3.8.1	282	303	PAO_13089	4	23	-10.18	ACGGUACACUUGCCGGGCAUGA&UCGUGUUUGCAGAGUGCUGU	(((((((.((.((.((((((((&)))))))))))).)))))))
R05D8.8.1	424	449	PAO_13089	2	23	-10.16	AUAGAAUUAUGCAAAUUAACAUGAGA&UUUCGUGUUUGCAGAGUGCUGU	((((.((..(((((....((((((((&)))))))))))))..)).))))
Y57A10C.6.1	1104	1127	PAO_13089	2	25	-10.15	ACCAGCUACGUGGCAAAUGUGGAA&UUUCGUGUUUGCAGAGUGCUGUGU	((((((.((...((((((((((((&))))))))))))...)))))).))
C54D10.1.1	308	322	PAO_13089	6	25	-10.07	ACAUAUCGCGGACAC&GUGUUUGCAGAGUGCUGUGU	(((((((((((((((&)))))))).))....)))))
C34E10.6.1	723	744	PAO_13089	1	21	-10	GGUUACUCUGUGUUCGCUGGAG&CUUUCGUGUUUGCAGAGUGCU	(((.((((((((..(((.((((&)))).)))..)))))))))))
C07G3.2.1	203	225	PAO_13089	3	25	-9.88	GCGUUGCUAGUUGGGGACAUGGA&UUCGUGUUUGCAGAGUGCUGUGU	(((..((...(((.(((((((((&))))))))).)))...))..)))
Y46H3A.3a.1	135	152	PAO_13089	6	23	-9.85	GCUCCAGUCUGCAGAAUC&GUGUUUGCAGAGUGCUGU	((..((.((((((((..(&)..)))))))).))..))
C33A12.3b.1	169	190	PAO_13089	2	22	-9.82	UAGCAUUUUUUUAAACAUUAAA&UUUCGUGUUUGCAGAGUGCUG	(((((((((..(((((((.(((&))).))))))).)))))))))
CD4.7b.1	89	95	PAO_13089	2	8	-9.69	CACGAAA&UUUCGUG	(((((((&)))))))
D1025.4.1	143	150	PAO_13089	2	9	-9.48	AUACGAAA&UUUCGUGU	((((((((&))))))))
C15C8.3a.1	68	79	PAO_13089	9	21	-9.23	GGUCUCUGCAGA&UUUGCAGAGUGCU	((((((((((((&))))))))).)))
F53F4.10.1	482	505	PAO_13089	1	23	-9.22	AUGGACUCUUCACAUUGGCGGAAG&CUUUCGUGUUUGCAGAGUGCUGU	(((((((((...((...(((((((&)))))))...)).))))).))))
W10D9.5a.1	40	60	PAO_13089	2	22	-9.21	CAGACUCGGAAAUUCAUGAGA&UUUCGUGUUUGCAGAGUGCUG	(((((((....(..(((((((&)))))))..)...)))).)))
F11G11.2.1	186	201	PAO_13089	8	25	-9.2	GCCAAGCACUCCAUUC&GUUUGCAGAGUGCUGUGU	((..(((((((((..(&)..))..)))))))..))
Y53F4B.33.1	605	622	PAO_13089	6	24	-8.88	CGCCACUCGUCCAGAUAC&GUGUUUGCAGAGUGCUGUG	((((((((...(((((((&)))))))..)))))..)))
K07A12.3.1	300	317	PAO_13089	6	24	-8.61	CGCUACAUUUUCGGGUAC&GUGUUUGCAGAGUGCUGUG	(((..(((((((((((((&))))))).))))))..)))
ZK652.2.1	184	191	PAO_13089	1	8	-8.57	UACGAAAG&CUUUCGUG	((((((((&))))))))
F49D11.8.1	190	209	PAO_13089	5	23	-8.48	GCAACGAUUGUGCAAACUCG&CGUGUUUGCAGAGUGCUGU	(((.(.(((.(((((((.((&)).))))))).)))).)))
M05D6.6.1	462	485	PAO_13097	1	25	-18.43	GAUGCAGGAGUAGUUGUUACCAAG&CUUAGGAACCGACUAACCCUGCGUC	((((((((..((((((((.(((((&))).))))).)))))..))))))))
R03D7.1.1	2965	2985	PAO_13097	1	25	-18.25	GACGCGGAUGUUGGUGCUGAG&CUUAGGAACCGACUAACCCUGCGUC	(((((((..((((((.(((((&)))))..)))))).....)))))))
H06H21.6.1	1044	1066	PAO_13097	5	25	-17.33	GAUGCAGGGAGUAUUUGGUUGCC&GGAACCGACUAACCCUGCGUC	(((((((((..((.((((((.((&)))))))).)).)))))))))
Y73C8C.2.1	394	403	PAO_13097	16	25	-16.73	GACGCAGGGU&ACCCUGCGUC	((((((((((&))))))))))
F49E8.5.1	37	52	PAO_13097	8	23	-16.72	CGCAGGAGGAGUCGGU&ACCGACUAACCCUGCG	((((((...(((((((&)))))))...))))))
F42E11.1a.1	210	229	PAO_13097	5	23	-16.66	CGCAGGGAAAUAGUCUUUCC&GGAACCGACUAACCCUGCG	(((((((...(((((.((((&))))..))))).)))))))
F15E6.6.1	2637	2650	PAO_13097	9	24	-16.58	GCGCGGGAAGUUGG&CCGACUAACCCUGCGU	(((((((.((((((&))))))...)))))))
F43C1.7.1	345	370	PAO_13097	3	24	-16.49	AUGCAGACAGGAGAGAUUGGUUUCUA&UAGGAACCGACUAACCCUGCGU	((((((...((..((.((((((((((&))))))))))))..))))))))
F07F6.8.1	40	58	PAO_13097	9	25	-16.2	GACGCAGGUUCUCAGUCGG&CCGACUAACCCUGCGUC	((((((((.....((((((&))))))...))))))))
ZK822.5a.1	1600	1612	PAO_13097	9	24	-15.88	ACGCAGGAGUCGG&CCGACUAACCCUGCGU	(((((((((((((&))))))...)))))))
E03H4.7.1	501	512	PAO_13097	3	14	-15.03	AGUCGGUUUUUA&UAGGAACCGACU	((((((((((((&))))))))))))
F54C1.7.8	521	535	PAO_13097	5	25	-14.82	GACGAGGACGGUUCC&GGAACCGACUAACCCUGCGUC	(((((((.(((((((&)))))))......))).))))
F41B5.3a.1	35	55	PAO_13097	3	22	-14.7	GCUGCGGUUUGUUUGUUCCUG&UAGGAACCGACUAACCCUGC	((.(.((((.(((.(((((((&))))))).))).))))).))
VC5.5.1	920	928	PAO_13097	8	16	-14.42	UUAGUCGGU&ACCGACUAA	(((((((((&)))))))))
B0205.14.1	160	183	PAO_13097	2	25	-14.35	GACGCAGAGAAGUGCGGAUUCUGG&UUAGGAACCGACUAACCCUGCGUC	(((((((.(.(((.(((.((((((&)))))).))))))..).)))))))
F44C8.1.1	431	438	PAO_13097	18	25	-14.21	GAUGCAGG&CCUGCGUC	((((((((&))))))))
R04B5.6.1	240	258	PAO_13097	5	20	-14.14	AGGGUUUAAAGUUGGUGAC&GGAACCGACUAACCCU	((((((...(((((((..(&)..)))))))))))))
C05C10.4.1	568	582	PAO_13097	3	24	-14.11	ACGCAGGUGGUCCUA&UAGGAACCGACUAACCCUGCGU	(((((((((((((((&))))).)))......)))))))
K09F6.10.1	1750	1768	PAO_13097	9	24	-14.02	AUGCGGGGCCAAAUGUCGG&CCGACUAACCCUGCGU	((((((((......(((((&)))))...))))))))
ZK455.4.1	367	390	PAO_13097	1	25	-13.82	GAUGAAGUUGUGUUUGUUCUUGAG&CUUAGGAACCGACUAACCCUGCGUC	((((..((((.(((.(((((((((&))))))))).)))))))....))))
C12D8.11.1	347	358	PAO_13097	9	22	-13.69	GCAGGGUAACGG&CCGACUAACCCUGC	(((((((..(((&)))....)))))))
C47E12.4a.1	89	108	PAO_13097	2	21	-13.69	CAGUGAUGGUCGUUUCUUGA&UUAGGAACCGACUAACCCUG	(((.(.((((((.(((((((&))))))).)))))).).)))
F44G3.2.1	149	167	PAO_13097	1	24	-13.6	AUGCAGCUCGCUUCUUAAG&CUUAGGAACCGACUAACCCUGCGU	((((((.(((.((((((((&)))))))).)))......))))))
F10E7.8a.1	1505	1514	PAO_13097	5	14	-13.54	AGUUGGUUCC&GGAACCGACU	((((((((((&))))))))))
F21F8.11.1	444	457	PAO_13097	5	18	-13.53	GGUAGAUCGGUUCU&GGAACCGACUAACC	(((((.((((((((&)))))))))).)))
Y105E8A.4.1	540	557	PAO_13097	9	25	-13.46	GGUGCAGCAGUUGGUUGG&CCGACUAACCCUGCGUC	(((((((..(((((((((&))))))))).)))))))
F18E3.7a.1	949	960	PAO_13097	13	24	-13.35	ACGUUGGGUUGG&CUAACCCUGCGU	((((.(((((((&))))))).))))
Y22D7AL.5a.1	1698	1725	PAO_13097	1	25	-13.35	GGCGGUAUGGGAGGAAUGGGAUUCUAAG&CUUAGGAACCGACUAACCCUGCGUC	((((.((.((..((..(.((.(((((((&))))))).)).)))..)).))))))
ZC376.7a.2	3	18	PAO_13097	6	22	-13.35	GCGAUGUGGUUGGUUC&GAACCGACUAACCCUGC	(((..(((((((((((&))))))))).))..)))
C45B11.3.1	3	25	PAO_13097	5	23	-13.34	UGCGGUAAAAUAAUGUCGGUUGC&GGAACCGACUAACCCUGCG	(((((.........(((((((.(&).))))))).....)))))
K01C8.10.1	1404	1416	PAO_13097	11	24	-13.32	ACGCAGGAUUGUC&GACUAACCCUGCGU	(((((((.(((((&))).)).)))))))
F44A6.5.1	165	184	PAO_13097	2	17	-13.06	GUUAGAAUCGUUGUUCCUGA&UUAGGAACCGACUAAC	(((((..(((..((((((((&))))))))))))))))
C27A2.2a.1	376	383	PAO_13097	18	25	-13.02	GACGCAGG&CCUGCGUC	((((((((&))))))))
C07D10.2b.2	222	241	PAO_13097	5	24	-13.01	AUGCAGCCGACAGUUGGUCC&GGAACCGACUAACCCUGCGU	((((((.....(((((((((&)).)))))))....))))))
E02H1.3.1	664	684	PAO_13097	8	25	-12.88	GGCGCGGAGCUAUUGGUCGGU&ACCGACUAACCCUGCGUC	(((((((.(...(((((((((&))))))))).))))))))
F22E10.2.1	2938	2945	PAO_13097	18	25	-12.88	GACGCAGG&CCUGCGUC	((((((((&))))))))
F37B4.7.1	1470	1476	PAO_13097	19	25	-12.88	GACGCGG&CUGCGUC	(((((((&)))))))
R08F11.3.1	352	358	PAO_13097	19	25	-12.79	GACGCAG&CUGCGUC	(((((((&)))))))
F57C12.4.1	4731	4740	PAO_13097	4	13	-12.75	GUUGGUUUCU&AGGAACCGAC	((((((((((&))))))))))
K11G9.1.1	973	998	PAO_13097	1	25	-12.74	GAUGACCGGAAUAGUUGGGAACGAGG&CUUAGGAACCGACUAACCCUGCGUC	((((.(.((..(((((((...(.(((&))).)...)))))))..)).)))))
F14H8.6b.1	1035	1048	PAO_13097	3	23	-12.68	CGCAGUGGUUCCUG&UAGGAACCGACUAACCCUGCG	((((((((((((((&))))))))).......)))))
F08F3.7.1	1400	1408	PAO_13097	8	16	-12.53	UUGGUCGGU&ACCGACUAA	(((((((((&)))))))))
F57B10.3b.4	42	49	PAO_13097	18	25	-12.5	GACGCGGG&CCUGCGUC	((((((((&))))))))
C35B1.1.1	488	494	PAO_13097	19	25	-12.37	GACGCAG&CUGCGUC	(((((((&)))))))
C14A4.14.1	1196	1214	PAO_13097	9	25	-12.35	GACGUGGUGGUGGAAAAGG&CCGACUAACCCUGCGUC	(((((((.(((......((&)).....))))))))))
F41C3.5.2	1375	1395	PAO_13097	2	24	-12.28	ACGCCGUUCAACAGUUCCUGA&UUAGGAACCGACUAACCCUGCGU	((((.(((...(.((((((((&)))))))).)...)))...))))
C49A9.8.1	142	149	PAO_13097	18	25	-12.21	GAUGCAGG&CCUGCGUC	((((((((&))))))))
F44E7.8a.1	1266	1273	PAO_13097	18	25	-12.19	GAUGCGGG&CCUGCGUC	((((((((&))))))))
F28A12.4.1	949	957	PAO_13097	17	25	-12.11	GACGCGGGG&CCCUGCGUC	(((((((((&)))))))))
W02D3.7.1	87	96	PAO_13097	11	20	-12.1	GGGGUUGGUC&GACUAACCCU	((((((((((&))))))))))
Y48G8AL.5a.1	272	281	PAO_13097	11	21	-12.02	CAGGGUUGUC&GACUAACCCUG	((((((((((&))).)))))))
ZK1320.4.1	1114	1121	PAO_13097	8	15	-11.99	UAGUCGGU&ACCGACUA	((((((((&))))))))
D2063.1.1	302	321	PAO_13097	1	19	-11.93	GGGAUUAAGUUGGUCCAAGG&CUUAGGAACCGACUAACCC	(((.((.(((((((((.(((&))).)).))))))))))))
C01G6.6a.1	738	749	PAO_13097	2	13	-11.8	GUCGGUUUCUAA&UUAGGAACCGAC	((((((((((((&))))))))))))
C27A7.5a.1	1056	1063	PAO_13097	18	25	-11.73	GACGUAGG&CCUGCGUC	((((((((&))))))))
C37H5.13a.1	245	252	PAO_13097	18	25	-11.68	GAUGCAGG&CCUGCGUC	((((((((&))))))))
C27H6.4a.1	993	1008	PAO_13097	4	24	-11.65	ACGUAAUUUGGUUCCU&AGGAACCGACUAACCCUGCGU	(((((..(((((((((&))))))))).......)))))
C52G5.2.1	601	616	PAO_13097	1	14	-11.63	AGUCGGAUAUCUUGAG&CUUAGGAACCGACU	((((((...(((((((&))))))).))))))
F54B8.4a.1	20	37	PAO_13097	5	24	-11.63	ACGCUGUGGUCGGUCACC&GGAACCGACUAACCCUGCGU	((((..((((((((..((&)).)))))))).....))))
C46F4.2.1	1877	1888	PAO_13097	5	17	-11.59	GUUGGUCGUUCC&GGAACCGACUAAC	((((((((((((&)))).))))))))
F14F9.3.1	572	585	PAO_13097	9	25	-11.45	GAUGUAGUAGAAGG&CCGACUAACCCUGCGUC	((((((((((..((&))..)))...)))))))
C16A3.7.1	308	317	PAO_13097	5	14	-11.42	AGUCGGUUCU&GGAACCGACU	((((((((((&))))))))))
F13C5.1.1	388	394	PAO_13097	9	15	-11.37	UAGUCGG&CCGACUA	(((((((&)))))))
R07E5.2.1	739	750	PAO_13097	6	17	-11.36	GUUUGUCGGUUU&GAACCGACUAAC	(((.((((((((&)))))))).)))
C47A10.1.1	3800	3817	PAO_13097	6	25	-11.33	GACGCAGAAACAGUCCUC&GAACCGACUAACCCUGCGUC	(((((((....((((.((&))...))))....)))))))
Y46H3A.3a.1	348	371	PAO_13097	4	25	-11.31	GAUGUAGAUGUUGGUGCAGUUGCU&AGGAACCGACUAACCCUGCGUC	(((((((..((((((.(.(((.((&)).))).))))))).)))))))
B0272.3.1	239	245	PAO_13097	19	25	-11.29	GACGCAG&CUGCGUC	(((((((&)))))))
C36A4.2.1	760	766	PAO_13097	19	25	-11.22	GAUGCAG&CUGCGUC	(((((((&)))))))
Y82E9BR.18.1	760	779	PAO_13097	5	25	-11.19	GAUGUUUGGGAUACGGUUCU&GGAACCGACUAACCCUGCGUC	(((((..(((.(((((((((&)))))))..)).))).)))))
Y50E8A.16.1	2174	2192	PAO_13097	5	23	-11.18	UGCGGGGAAAAAGGAGUCC&GGAACCGACUAACCCUGCG	(((((((.....((..(((&))).))......)))))))
C05A9.1a.1	516	540	PAO_13097	2	21	-11.17	CAGGGCACUUGUCAAUUGUUCUUAA&UUAGGAACCGACUAACCCUG	(((((.....(((....((((((((&)))))))).)))...)))))
Y73C8B.1.1	389	395	PAO_13097	17	23	-11.16	UGCAGGG&CCCUGCG	(((((((&)))))))
F11C1.5a.1	4105	4111	PAO_13097	5	11	-11.14	CGGUUCC&GGAACCG	(((((((&)))))))
C27B7.1a.1	643	655	PAO_13097	10	24	-11.12	AUGCAGGAAGUUG&CGACUAACCCUGCGU	(((((((.(((((&)))))...)))))))
K11D12.3a.1	900	918	PAO_13097	5	24	-11.07	ACGCUAUUAUGUUGGUUUU&GGAACCGACUAACCCUGCGU	((((......(((((((((&))))))))).......))))
C55B7.4b.6	32	55	PAO_13097	2	22	-10.97	GCUAAUGGGUGUUCAUGUUCCUGA&UUAGGAACCGACUAACCCUGC	((....((((..((..((((((((&)))))))).))...)))).))
F16B4.9.1	152	158	PAO_13097	17	23	-10.91	UGCAGGG&CCCUGCG	(((((((&)))))))
R11A5.4d.2	29	35	PAO_13097	8	14	-10.9	AGUCGGU&ACCGACU	(((((((&)))))))
B0361.8.1	212	218	PAO_13097	19	25	-10.89	GAUGCAG&CUGCGUC	(((((((&)))))))
B0564.1a.1	526	533	PAO_13097	18	25	-10.88	GAUGCAGG&CCUGCGUC	((((((((&))))))))
F08A8.3.1	397	413	PAO_13097	9	22	-10.86	GCAGGAGAAGUGGUUGG&CCGACUAACCCUGC	(((((.(...(((((((&))))))).))))))
F54D5.12.1	721	731	PAO_13097	2	13	-10.84	GCGGUUCCUAA&UUAGGAACCGAC	(((((((((((&)))))))))).)
R107.5b.1	268	274	PAO_13097	17	23	-10.79	UGCAGGG&CCCUGCG	(((((((&)))))))
K06A5.6.1	751	781	PAO_13097	1	24	-10.73	ACGUUCGGGUCCACAAGUCGUCAAUUCUGGG&CUUAGGAACCGACUAACCCUGCGU	((((..((((.....(((((....(((((((&)))))))..))))).)))).))))
C29F5.1.1	939	958	PAO_13097	4	24	-10.72	ACGUGGGCUCAGUUGUUCUU&AGGAACCGACUAACCCUGCGU	(((((((.(.((((((((((&)))))).)))).).)))))))
C52B9.7b.1	484	507	PAO_13097	8	25	-10.7	GACGGAGAAAAAUGGAGAGUUGGU&ACCGACUAACCCUGCGUC	((((.((......((..(((((((&)))))))..)))).))))
C12C8.1.1	1641	1647	PAO_13097	19	25	-10.61	GACGCAG&CUGCGUC	(((((((&)))))))
ZK632.3.1	389	409	PAO_13097	1	24	-10.61	AUGCAGGAAACAGAUUCUGAG&CUUAGGAACCGACUAACCCUGCGU	(((((((...(.(.(((((((&))))))).).)......)))))))
K02F2.2.1	1458	1477	PAO_13097	5	23	-10.6	CGCCUGAUUUAGUCGUUUUU&GGAACCGACUAACCCUGCG	(((..(..(((((((.((((&)))).)))))))..).)))
C49G7.10b.1	77	83	PAO_13097	18	24	-10.55	GCGCGGG&CCUGCGU	(((((((&)))))))
C05E4.9a.1	831	837	PAO_13097	19	25	-10.53	GACGCAG&CUGCGUC	(((((((&)))))))
F12E12.11.1	845	851	PAO_13097	18	24	-10.53	AUGCAGG&CCUGCGU	(((((((&)))))))
C34E10.6.1	299	319	PAO_13097	1	18	-10.52	GGUAGUCGGACGUUCCCCAAG&CUUAGGAACCGACUAACC	(((((((((...((((..(((&))).))))))))))).))
ZC97.1a.2	836	858	PAO_13097	1	18	-10.5	GGUGUGUUCAGAUUGUUCUUAAG&CUUAGGAACCGACUAACC	(((..(((......(((((((((&))))))))).)))..)))
Y58A7A.3.1	1379	1388	PAO_13097	17	25	-10.47	GACGUAGCGG&CCCUGCGUC	(((((((.((&)))))))))
C37A5.1.1	485	495	PAO_13097	4	22	-10.42	GCGGGGUUCCU&AGGAACCGACUAACCCUGC	(((((((((((&))))........)))))))
F14F7.3.1	950	973	PAO_13097	1	25	-10.4	GACGUAGAAUUAGAGAAUAAUGAG&CUUAGGAACCGACUAACCCUGCGUC	(((((((..((((.(..(..((((&))))..)..)..))))..)))))))
D2023.2a.1	396	412	PAO_13097	6	24	-10.34	AUGCAGGAAUAGUGUUC&GAACCGACUAACCCUGCGU	(((((((..((((((((&))))..))))..)))))))
F59B1.8.1	1145	1151	PAO_13097	17	23	-10.3	UGCAGGG&CCCUGCG	(((((((&)))))))
F02A9.4.1	1069	1075	PAO_13097	19	25	-10.23	GAUGCAG&CUGCGUC	(((((((&)))))))
H12C20.3a.1	633	650	PAO_13097	1	24	-10.22	ACGUUCAAGGUUUUUAAG&CUUAGGAACCGACUAACCCUGCGU	((((....((((((((((&))))))))))..........))))
C30H6.7a.1	634	653	PAO_13097	2	25	-10.19	GGCGUUUUGGCGAUUUCUAG&UUAGGAACCGACUAACCCUGCGUC	(((((.((((((.(((((((&))))))).)).))))....)))))
F09F3.9.1	641	648	PAO_13097	17	24	-10.09	AUGCAGGG&CCCUGCGU	((((((((&))))))))
F55F8.5.1	229	236	PAO_13097	8	15	-10.08	UGGUUGGU&ACCGACUA	((((((((&))))))))
K08D9.4a.1	501	519	PAO_13097	2	21	-10.04	CAGGGUUGAGGAUUAAUAA&UUAGGAACCGACUAACCCUG	((((((((.((.((..(((&)))..))))...))))))))
Y46H3D.6b.1	95	110	PAO_13097	10	25	-9.9	GAUGUAGUGGAAGUUG&CGACUAACCCUGCGUC	(((((((.((.(((((&)))))..)))))))))
C17C3.1a.1	889	898	PAO_13097	5	13	-9.86	GUAUGGUUCC&GGAACCGAC	((.(((((((&)))))))))
F28A10.6.1	451	458	PAO_13097	18	25	-9.86	GACGCGGG&CCUGCGUC	((((((((&))))))))
K08E7.9.1	1327	1333	PAO_13097	18	24	-9.81	AUGCAGG&CCUGCGU	(((((((&)))))))
Y53F4B.33.1	436	456	PAO_13097	2	20	-9.81	AGAGUAAGUCUGGAUUCCUAG&UUAGGAACCGACUAACCCU	((.((.((((.((.(((((((&))))))))))))).)).))
F28F8.2.1	125	132	PAO_13097	6	13	-9.78	GUCGGUUC&GAACCGAC	((((((((&))))))))
F53A2.7.1	753	759	PAO_13097	18	24	-9.76	AUGCAGG&CCUGCGU	(((((((&)))))))
R05D8.8.1	882	888	PAO_13097	18	24	-9.71	AUGCAGG&CCUGCGU	(((((((&)))))))
Y60A3A.7.1	455	463	PAO_13097	14	22	-9.7	GCGGGGUUA&UAACCCUGC	(((((((((&)))))))))
M117.2b.2	1043	1063	PAO_13097	2	23	-9.66	CGUCACUAUUGUCAUUCCUAA&UUAGGAACCGACUAACCCUGCG	(((.......(((.(((((((&)))))))..))).......)))
C23H5.8a.1	601	619	PAO_13097	9	25	-9.61	GGUGCAGUGUUUAUGUUGG&CCGACUAACCCUGCGUC	(((((((.(((...(((((&))))).))).)))))))
C10H11.6a.1	751	757	PAO_13097	19	25	-9.56	GAUGCAG&CUGCGUC	(((((((&)))))))
F59A2.3.1	620	626	PAO_13097	6	12	-9.55	UCGGUUC&GAACCGA	(((((((&)))))))
C14B1.3.1	159	165	PAO_13097	19	25	-9.53	GAUGCAG&CUGCGUC	(((((((&)))))))
K02A11.3.1	572	593	PAO_13097	5	24	-9.52	AUGCAUAAUUGGGUUAGAUUCU&GGAACCGACUAACCCUGCGU	(((((.....(((((((.((((&))))....))))))))))))
F26D10.9a.1	941	967	PAO_13097	1	25	-9.51	GAAUCAAGGGAUGAGUUGGUAGAUAAG&CUUAGGAACCGACUAACCCUGCGUC	((....((((...(((((((...((((&))))...)))))))..))))...))
Y51A2D.9a.1	420	426	PAO_13097	8	14	-9.51	AGUUGGU&ACCGACU	(((((((&)))))))
C25A1.7.1	1863	1879	PAO_13097	5	24	-9.46	AUUCAGAGGAUGGUUCC&GGAACCGACUAACCCUGCGU	((.(((.((.(((((((&))))))).....))))).))
W10D9.5a.1	137	143	PAO_13097	10	16	-9.43	UUGGUCG&CGACUAA	(((((((&)))))))
E04A4.4c.2	698	705	PAO_13097	5	12	-9.42	UUGGUUCC&GGAACCGA	((((((((&))))))))
C31C9.1a.1	1486	1495	PAO_13097	4	13	-9.41	GUUGGUUUUU&AGGAACCGAC	((((((((((&))))))))))
F27D4.1.1	355	386	PAO_13097	1	25	-9.41	GACGUGGAGUUAUUCCAAGAGUCGCCGCUAAG&CUUAGGAACCGACUAACCCUGCGUC	(((((((.(((........(((((...(((((&)))))....)))))))).)))))))
C54D10.1.1	257	280	PAO_13097	6	22	-9.39	GCUUCGUUGGUCAAGAAACGGUUC&GAACCGACUAACCCUGC	((...(((((((.......(((((&))))))))))))...))
C15B12.8.1	2	9	PAO_13097	8	15	-9.37	UGGUUGGU&ACCGACUA	((((((((&))))))))
C52E4.1.1	964	989	PAO_13097	1	24	-9.26	ACUGGGGAGAGAGCGGUUUCUUCAAG&CUUAGGAACCGACUAACCCUGCGU	(((((((..((..((((((((..(((&))))))))))).))..))))).))
F53C3.6a.1	168	183	PAO_13097	9	25	-9.26	GACGUGGUGGCGGCGG&CCGACUAACCCUGCGUC	(((((((.(..(((((&))).))..).)))))))
W01A8.1c.1	813	819	PAO_13097	18	24	-9.26	ACGUGGG&CCUGCGU	(((((((&)))))))
C33A12.3a.1	417	434	PAO_13097	13	24	-9.23	ACGCAACAAAUGGGUUGG&CUAACCCUGCGU	(((((......(((((((&))))))))))))
M88.1.1	536	542	PAO_13097	8	14	-9.14	AGUCGGU&ACCGACU	(((((((&)))))))
M04F3.4b.1	566	573	PAO_13097	2	9	-9.13	GUUCCUGA&UUAGGAAC	((((((((&))))))))
C15H11.3.1	1858	1875	PAO_13097	2	24	-9.12	AUGCUUAGUUCUUCCUGA&UUAGGAACCGACUAACCCUGCGU	((((((((((.(((((((&)))))))..))))))....))))
R02E12.6.2	13	28	PAO_13097	5	22	-9.06	GCGGCCACUCGGUUCC&GGAACCGACUAACCCUGC	((((....((((((((&))))))))......))))
F56B3.5.1	1440	1449	PAO_13097	2	11	-9.04	CGGUUUUUAA&UUAGGAACCG	((((((((((&))))))))))
C15C8.3b.2	22	31	PAO_13097	6	22	-8.98	GCAUCGGUUC&GAACCGACUAACCCUGC	((((((((((&))))))).......)))
C06A8.1a.1	694	700	PAO_13097	18	24	-8.97	GCGCAGG&CCUGCGU	(((((((&)))))))
F54A5.2a.1	455	462	PAO_13097	2	9	-8.94	GUUCCUAA&UUAGGAAC	((((((((&))))))))
C08F8.2b.1	2230	2256	PAO_13097	5	24	-8.93	AUGUUUAGGUUAGACACACCCGGUUUU&GGAACCGACUAACCCUGCGU	((((...((((((.......(((((((&))))))).))))))..))))
F54D11.1.1	1180	1189	PAO_13097	9	20	-8.92	AGGGUUACGG&CCGACUAACCCU	((((((((((&)))..)))))))
Y53G8B.2.1	875	893	PAO_13097	5	23	-8.87	CGAUACCGUAGUCGGAGCC&GGAACCGACUAACCCUGCG	((......(((((((..((&))..)))))))......))
W03G1.5.1	83	89	PAO_13097	19	25	-8.83	GAUGCAG&CUGCGUC	(((((((&)))))))
W09H1.5.1	307	317	PAO_13097	10	22	-8.77	GCGGUUGGUGG&CGACUAACCCUGC	(((((((((.(&).)))))))..))
F41G3.10.1	44	66	PAO_13097	1	19	-8.75	GGGAUUUCGGUUCAACAACUAGG&CUUAGGAACCGACUAACCC	(((...(((((((.....(((((&))))))))))))....)))
K07A12.3.1	258	277	PAO_13097	4	25	-8.75	GAGGUAGUCUUUUGGUUCUU&AGGAACCGACUAACCCUGCGUC	((.((((..(((((((((((&)))))))))..))..)))).))
Y57A10C.6.1	40	46	PAO_13097	8	14	-8.73	AGUCGGU&ACCGACU	(((((((&)))))))
C34C12.8.1	263	287	PAO_13097	1	22	-8.7	GCAGGCCGAAAGCUUGGAUUUUAAG&CUUAGGAACCGACUAACCCUGC	(((((.....((.((((.(((((((&))))))).))))))...)))))
K01D12.10.1	15	35	PAO_13097	1	25	-8.64	GACGCUGGUACUUCUUCUAGG&CUUAGGAACCGACUAACCCUGCGUC	(((((.(((...(((((((((&)))))))...))...)))..)))))
F49E12.9a.1	790	801	PAO_13097	4	14	-8.57	AGUCCGGUUCUU&AGGAACCGACU	((((.(((((((&)))))))))))
C54G7.2.1	1487	1493	PAO_13097	15	21	-8.44	CAGGGUU&AACCCUG	(((((((&)))))))
DH11.2.1	138	149	PAO_13097	10	21	-8.4	CAGAGUUAGUUG&CGACUAACCCUG	(((.((((((((&)))))))).)))
C17G10.8.1	715	721	PAO_13097	19	25	-8.32	GAUGCAG&CUGCGUC	(((((((&)))))))
C07G3.2.1	202	216	PAO_13097	9	25	-8.24	GGCGUUGCUAGUUGG&CCGACUAACCCUGCGUC	(((((.(.(((((((&)))))))...).)))))
Y49C4A.8a.1	1037	1053	PAO_13097	1	16	-8.18	UUAGUUAUGUUCCUGCG&CUUAGGAACCGACUAA	((((((..(((((((.(&).))))))).))))))
D2096.8.1	457	476	PAO_13097	5	22	-8.17	GCAAGGAUCCAGCCGGUUUC&GGAACCGACUAACCCUGC	(((.((....((.(((((((&))))))).))..)).)))
F56C11.6a.1	730	736	PAO_13097	19	25	-8.17	GAUGCGG&CUGCGUC	(((((((&)))))))
W07B8.5.1	403	411	PAO_13097	3	11	-8.17	CGGUUCCUG&UAGGAACCG	(((((((((&)))))))))
C01B10.11.1	378	389	PAO_13097	1	12	-8.14	UUGGAUCUUAAG&CUUAGGAACCGA	((((.(((((((&))))))).))))
ZK617.2.1	114	120	PAO_13097	19	25	-8.11	GAUGCAG&CUGCGUC	(((((((&)))))))
B0399.2.1	1699	1718	PAO_13097	1	20	-8.1	AGUAUUUGCGGUUUUAUGAG&CUUAGGAACCGACUAACCCU	((..((.((((((((.((((&))))))))))).).))..))
F40E10.3.1	206	212	PAO_13097	19	25	-8.1	GACGUGG&CUGCGUC	(((((((&)))))))
F43E2.4.1	211	219	PAO_13097	4	13	-8.08	GCGGUUCUU&AGGAACCGAC	(((((((((&)))))))).)
F58F9.7.1	1635	1652	PAO_13097	2	19	-8.08	GGGUUCAACAGUUCUUGA&UUAGGAACCGACUAACCC	(((((...(.((((((((&)))))))).)...)))))
ZC376.7a.1	1269	1287	PAO_13100	1	19	-21.24	GUGGAGUUGUUCUGAAGCC&GGCUUACAGAACGCUCCUC	(.((((.((((((((((((&))))).))))))))))).)
W03G1.5.1	582	597	PAO_13100	1	16	-20.51	GAGCGUUCUGGAAGUU&GGCUUACAGAACGCUC	((((((((((..((((&))))..))))))))))
K11G9.1.1	995	1011	PAO_13100	2	19	-19.41	GAGGGGCUUCUGUUUGC&GCUUACAGAACGCUCCUC	(((((((((((((..((&))..)))))).)))))))
Y22D7AL.5a.1	1209	1226	PAO_13100	1	20	-19.34	GGAGGAGGAUCUGAAGUU&GGCUUACAGAACGCUCCUCU	((((((((.(((((((((&))))).)))).).)))))))
F11C1.5a.1	4293	4310	PAO_13100	3	20	-19.21	GGAGGGGCGGAUGAUGAG&CUUACAGAACGCUCCUCU	(((((((((..((.((((&))))))...)))))))))
K01D12.10.1	439	456	PAO_13100	3	20	-18.78	GGAGGAGGAGGAAGUGGG&CUUACAGAACGCUCCUCU	(((((((......(((((&)))))......)))))))
C05A9.1a.1	3441	3452	PAO_13100	1	12	-18.55	GUUUUGUAAGCC&GGCUUACAGAAC	((((((((((((&))))))))))))
C27H6.4a.1	586	606	PAO_13100	3	19	-18.29	GAGGAGGGAAAACACUGUAAG&CUUACAGAACGCUCCUC	((((((.(......(((((((&)))))))..).))))))
C47E12.4a.1	664	682	PAO_13100	2	19	-18.27	GGGGAGCUGUUCUGCAAGU&GCUUACAGAACGCUCCUC	(((((((.((((((.((((&)))).)))))))))))))
F09F7.4a.1	333	350	PAO_13100	1	20	-18.23	GGAGGAGAUGUUCUUGCC&GGCUUACAGAACGCUCCUCU	(((((((.((((((.(((&)))....)))))))))))))
C05D11.11a.1	347	365	PAO_13100	1	19	-17.95	GGGGAGUCAAUGUGCAGCC&GGCUUACAGAACGCUCCUC	(((((((...((((.((((&))))))))....)))))))
F56C11.6a.1	287	305	PAO_13100	1	19	-17.74	GAGGAGCACUGUCUCAGCC&GGCUUACAGAACGCUCCUC	(((((((.((((...((((&)))).))))...)))))))
R03D7.1.1	1093	1110	PAO_13100	1	19	-17.64	GGGGAGCGCUGUAACGUC&GGCUUACAGAACGCUCCUC	((((((((((((((.(((&)))))))))..))))))))
F26D10.9a.1	518	537	PAO_13100	1	19	-17.47	GAGGAGCAGUUUAAGGAGCU&GGCUUACAGAACGCUCCUC	(((((((.((((...(((((&)))))...)))))))))))
F42E11.1a.1	1082	1095	PAO_13100	2	17	-17.21	GGAGUGUUUUGGGC&GCUUACAGAACGCUCC	((((((((((((((&)))..)))))))))))
F18E3.7a.1	610	630	PAO_13100	1	20	-17.19	AGAGGAGUCAUUUUGGAAGUU&GGCUUACAGAACGCUCCUCU	(((((((.(.(((((..((((&))))..))))).))))))))
R02E12.6.2	41	57	PAO_13100	1	18	-17.03	GGGGGCGACUGUAAAAC&GGCUUACAGAACGCUCCU	(((((((.((((((..(&)..))))))..)))))))
D2023.2a.1	3352	3369	PAO_13100	1	18	-16.95	AGGAGAUGUUUUGGAGCU&GGCUUACAGAACGCUCCU	(((((.((((((((((((&))))).))))))))))))
Y57A10C.6.1	55	66	PAO_13100	1	12	-16.78	GUUUUGUAAGCC&GGCUUACAGAAC	((((((((((((&))))))))))))
C30H6.7a.1	811	831	PAO_13100	1	20	-16.68	GGAGGAACUCGUUCUGAAGUU&GGCUUACAGAACGCUCCUCU	((((((...((((((((((((&))))).))))))).))))))
F08F3.7.1	999	1015	PAO_13100	1	19	-16.61	GAUGGAGAGAGUGAGCC&GGCUUACAGAACGCUCCUC	((.((((.(.(((((((&)))))))....).))))))
C27A7.5b.1	422	434	PAO_13100	2	14	-16.55	GUGUUCUGUUUGU&GCUUACAGAACGC	(((((((((..((&))..)))))))))
C34C12.8.1	17	36	PAO_13100	1	18	-16.54	AGGAGUGUCUUUCGUCGGCC&GGCUUACAGAACGCUCCU	((((((((.(((.((.((((&)))).)))))))))))))
F57B10.3b.1	64	78	PAO_13100	3	19	-16.06	GGGGAGUUUCUGAAG&CUUACAGAACGCUCCUC	(((((((((((((((&))).))))).)))))))
F16B4.9.1	644	668	PAO_13100	2	19	-15.81	GAGGAAAUGUUCGUGUUCUGCGAGC&GCUUACAGAACGCUCCUC	(((((.......((((((((.((((&)))).)))))))))))))
K02E11.10.1	714	729	PAO_13100	1	18	-15.74	GGGAGGUUUUGUUGCU&GGCUUACAGAACGCUCCU	((((((((((((.(((&)))..))))))).)))))
C47A10.1.1	1389	1401	PAO_13100	1	17	-15.72	GGAGUUGUGAGCC&GGCUUACAGAACGCUCC	(((((((((((((&))))))))....)))))
C17G10.8.1	676	694	PAO_13100	1	20	-15.69	GGAGGAGAAGCUGGAAGCC&GGCUUACAGAACGCUCCUCU	(((((((...(((..((((&))))..)))....)))))))
C23H5.8b.1	539	560	PAO_13100	1	20	-15.67	AGUUGGGCAAAUUCUGUGAACC&GGCUUACAGAACGCUCCUCU	((..((((...((((((((.((&)).)))))))).))))..))
E02H1.3.1	435	449	PAO_13100	1	18	-15.59	AGGAGUGUUUUGGUC&GGCUUACAGAACGCUCCU	(((((((((((((((&)))...))))))))))))
F10E7.8a.1	1154	1172	PAO_13100	2	20	-15.5	GGAGGAGCUUACUGUUCGU&GCUUACAGAACGCUCCUCU	((((((((((.((((..((&))..)))))).))))))))
C14C10.3a.1	1816	1830	PAO_13100	2	15	-15.46	AGCGUUAUUGUGAGC&GCUUACAGAACGCU	((((((.((((((((&))))))))))))))
ZK617.2.1	187	201	PAO_13100	1	20	-15.37	GGAGGAGUUGUAACU&GGCUUACAGAACGCUCCUCU	(((((((((((((((&)).)))))....))))))))
F14F9.3.1	625	643	PAO_13100	3	19	-15.33	GAGGAGUGUGAAGAUGAAG&CUUACAGAACGCUCCUC	(((((((((.....(((((&))).))..)))))))))
Y105E8A.4.1	556	576	PAO_13100	1	19	-15.32	GGGGAGGCUGUUCUGUUGGCU&GGCUUACAGAACGCUCCUC	((((((.(.(((((((.((((&)))).))))))))))))))
ZK822.5a.1	642	650	PAO_13100	9	17	-15.31	GGAGUGUUC&GAACGCUCC	(((((((((&)))))))))
F41B5.4.1	1633	1647	PAO_13100	3	17	-15.07	GGAGUGUUCCCUAAG&CUUACAGAACGCUCC	(((((((((..((((&))))..)))))))))
ZK652.2.1	228	239	PAO_13100	1	12	-15.05	GUUUUGUUAGCC&GGCUUACAGAAC	(((((((.((((&)))).)))))))
C52B9.7b.1	662	670	PAO_13100	12	20	-14.97	GGAGGGGGG&CGCUCCUCU	(((((((.(&).)))))))
C14A4.14.1	1162	1176	PAO_13100	3	20	-14.86	GGAGGAGGUGAAGAG&CUUACAGAACGCUCCUCU	(((((((((...(((&))).....)).)))))))
C16A3.7.1	1364	1385	PAO_13100	1	18	-14.86	AGGAGUGUGGAGAAUGUGAAAC&GGCUUACAGAACGCUCCU	((((((((......(((((..(&)..)))))..))))))))
C06H2.1.1	368	386	PAO_13100	1	20	-14.78	GGUGGAGGAAAAGUGGGCC&GGCUUACAGAACGCUCCUCU	((.((((.....(((((((&)))))))......)))).))
Y53F4B.33.1	254	272	PAO_13100	1	20	-14.78	AGAGGAGCAGGCUUGGGCU&GGCUUACAGAACGCUCCUCU	((((((((...((((((((&)))))).))...))))))))
C54D10.1.1	383	401	PAO_13100	1	18	-14.76	AGAAGCACAUUCUGUAGCC&GGCUUACAGAACGCUCCU	((.(((...((((((((((&))).))))))).))).))
C01B10.11.1	809	829	PAO_13100	1	18	-14.61	GGGAAUUUGGGAAUGUGAGCC&GGCUUACAGAACGCUCCU	((((....(.(..((((((((&))))))))...).)))))
C54G7.2.1	488	495	PAO_13100	13	20	-14.48	GGAGGAGC&GCUCCUCU	((((((((&))))))))
Y50D4B.2a.1	44	56	PAO_13100	7	19	-14.44	GAGGAGUUGUCUG&CAGAACGCUCCUC	(((((((..((((&))))..)))))))
F32D8.12a.1	1431	1447	PAO_13100	2	14	-14.41	GCGUAUUUUCUGUAAGU&GCUUACAGAACGC	((((....(((((((((&)))))))))))))
K09F6.10.1	2201	2216	PAO_13100	1	15	-14.41	AGUGUUUUGUGGCGUC&GGCUUACAGAACGCU	((((((((((((.(((&)))))))))))))))
K02A11.3.1	241	255	PAO_13100	1	14	-14.23	GCUGUUUCGUAAGCC&GGCUUACAGAACGC	((.((((.(((((((&))))))).))))))
F28A10.6.1	97	114	PAO_13100	1	19	-14.05	GAAGAUGUUUUGGAAGCC&GGCUUACAGAACGCUCCUC	((.(((((((((..((((&))))..))))))).)).))
C05C10.4.1	181	203	PAO_13100	1	20	-13.87	GGAGGAGGUGGUCUCGGAGAGCU&GGCUUACAGAACGCUCCUCU	(((((((.((.(((.(..(((((&))))).)))).)))))))))
C08F8.2b.1	112	125	PAO_13100	3	18	-13.86	AGGAAUUCUGUGAG&CUUACAGAACGCUCCU	((((.(((((((((&)))))))))...))))
K09A9.1.1	510	526	PAO_13100	2	20	-13.79	AGAGGAGAAGUCGAAGC&GCUUACAGAACGCUCCUCU	(((((((...(((((((&)))).).))...)))))))
F40F4.4a.1	535	556	PAO_13100	1	20	-13.68	GGAGUGAGCUGGUUUGUGAGAC&GGCUUACAGAACGCUCCUCU	((((.((((.(.((((((((.(&).)))))))).)))))))))
K12G11.3.1	368	381	PAO_13100	3	14	-13.66	GCGAAUUCUGUAAG&CUUACAGAACGC	(((..(((((((((&))))))))))))
W10D9.5b.1	120	135	PAO_13100	2	17	-13.63	GGGGUGUUAAGGGAGU&GCUUACAGAACGCUCC	((((((((..(.((((&)))).)..))))))))
F13C5.1.1	337	355	PAO_13100	1	20	-13.59	AGAAGGAGUGGAGUUGGCC&GGCUUACAGAACGCUCCUCU	((.(((((((..((.((((&)))).))....)))))))))
C06E7.1a.1	862	879	PAO_13100	2	20	-13.58	AGUCGAUCGUUCUGCCGC&GCUUACAGAACGCUCCUCU	((..((.(((((((..((&))...))))))).))..))
F49E8.5.1	669	684	PAO_13100	1	19	-13.57	GGGGAGUGUGUAUUCC&GGCUUACAGAACGCUCCUC	((((((((((((..((&))..)))...)))))))))
C49G7.5.1	284	291	PAO_13100	13	20	-13.55	AGAGGAGC&GCUCCUCU	((((((((&))))))))
F54C1.7.9	551	567	PAO_13100	1	19	-13.51	GAGGAGUUCUGGGAGUU&GGCUUACAGAACGCUCCUC	(((((((((((.(((((&))))).))))..)))))))
W08D2.4d.2	116	131	PAO_13100	7	20	-13.47	GGAGGAGCUGUUAUUG&CAGAACGCUCCUCU	((((((((.(((.(((&))))))))))))))
F38E11.1.1	65	76	PAO_13100	1	12	-13.42	GUCCUGUAAGCC&GGCUUACAGAAC	((.(((((((((&))))))))).))
C46F4.2.1	1365	1383	PAO_13100	1	20	-13.3	GGAGGAGCUCCAUUGAGCC&GGCUUACAGAACGCUCCUCU	((((((((((...((((((&))))))..))..))))))))
F22B5.4.1	207	230	PAO_13100	1	20	-13.27	AGAGAUCCACGUUUUGUUAAAGUC&GGCUUACAGAACGCUCCUCU	((((.....((((((((..(((((&)))))))))))))...))))
Y82E9BR.18.1	2499	2506	PAO_13100	13	20	-13.06	GGAGGAGC&GCUCCUCU	((((((((&))))))))
K07C5.4.1	408	419	PAO_13100	1	16	-13	GAGCGUUUGGCC&GGCUUACAGAACGCUC	((((((((((((&))))....))))))))
C27B7.1a.1	685	700	PAO_13100	4	19	-12.94	GAGGAGCGCGGUGUAG&UUACAGAACGCUCCUC	((((((((...(((((&)))))...))))))))
E04A4.4a.1	1798	1813	PAO_13100	1	17	-12.9	GGAAUGUUCUGAAACC&GGCUUACAGAACGCUCC	(((.(((((((((.((&)).)).))))))).)))
K11D12.3a.1	52	59	PAO_13100	13	20	-12.9	GGAGGAGC&GCUCCUCU	((((((((&))))))))
R53.4.1	99	108	PAO_13100	8	17	-12.89	GGAGUGUUCU&AGAACGCUCC	((((((((((&))))))))))
C31E10.7.1	314	327	PAO_13100	1	20	-12.85	AGAGGAGGAGAGUC&GGCUUACAGAACGCUCCUCU	(((((((..(((((&)))))........)))))))
R04B5.6.1	790	806	PAO_13100	8	20	-12.84	GGAGGAGUUGUUGUUCU&AGAACGCUCCUCU	((((((((....(((((&)))))))))))))
C15C8.3a.1	822	833	PAO_13100	9	20	-12.79	GGAGGAGCAUUC&GAACGCUCCUCU	((((((((.(((&))).))))))))
F57C12.4.1	1539	1546	PAO_13100	13	20	-12.78	AGAGGAGU&GCUCCUCU	((((((((&))))))))
F44C4.3.1	1026	1043	PAO_13100	1	20	-12.75	GGAGGAGUCCCAAAAGUC&GGCUUACAGAACGCUCCUCU	((((((((.(...(((((&)))))...)...))))))))
C01B12.3.1	1678	1693	PAO_13100	1	20	-12.69	AGAGGAGGAAGAAGCU&GGCUUACAGAACGCUCCUCU	(((((((....(((((&)))))........)))))))
F08H9.6.1	197	207	PAO_13100	1	12	-12.61	GUUCUGUAGCU&GGCUUACAGAAC	(((((((((((&))).))))))))
F15E6.6.1	2108	2125	PAO_13100	1	20	-12.59	AGGGGAGGGUGAUGAGUC&GGCUUACAGAACGCUCCUCU	(((((((.((..((((((&))))))....)).)))))))
Y46G5A.18b.1	1021	1028	PAO_13100	13	20	-12.59	AGAGGAGC&GCUCCUCU	((((((((&))))))))
W02D3.5.1	62	77	PAO_13100	3	19	-12.58	GAGGAGUACAUGAAGG&CUUACAGAACGCUCCUC	(((((((...((.(((&))).))....)))))))
F21F8.11.1	292	307	PAO_13100	3	20	-12.5	GGAGGAGAUGAUGGAG&CUUACAGAACGCUCCUCU	(((((((....(((((&))).)).....)))))))
C25A1.7.1	538	553	PAO_13100	7	20	-12.49	AGAUGGGGUGUUACUG&CAGAACGCUCCUCU	(((.((((((((.(((&))))))))))))))
H06H21.6.1	834	854	PAO_13100	2	20	-12.42	AGAGGGGCAAAAACCGAAAGC&GCUUACAGAACGCUCCUCU	((((((((.....(.(.((((&)))).).)...))))))))
F37B4.2.1	1036	1045	PAO_13100	7	18	-12.41	AGGAGCGCUG&CAGAACGCUCCU	((((((((((&)))..)))))))
C17C3.1a.1	827	835	PAO_13100	1	9	-12.36	CUGUGAGCC&GGCUUACAG	(((((((((&)))))))))
F53F4.10.1	413	419	PAO_13100	13	19	-12.33	GAGGAGC&GCUCCUC	(((((((&)))))))
D2063.1.1	566	582	PAO_13100	1	17	-12.32	GGAGCUGGUGGUGGGCU&GGCUUACAGAACGCUCC	(((((.....(((((((&))))))).....)))))
ZK455.4.1	1828	1843	PAO_13100	1	19	-12.31	GAGAGUUUCUGUGAUC&GGCUUACAGAACGCUCCUC	((((((((((((((((&)).)))))))).))).)))
F57B9.6a.1	163	178	PAO_13100	2	20	-12.17	GGAGGAGCUUCUUCGC&GCUUACAGAACGCUCCUCU	((((((((((((..((&))....)))).))))))))
D2096.8.1	794	811	PAO_13100	1	20	-12.16	AGAGGAGUUCCUUGAGCU&GGCUUACAGAACGCUCCUCU	((((((((((..((((((&))))))..))..))))))))
Y53G8B.2.1	1057	1074	PAO_13100	1	13	-12.13	UGUUCUGUGAAAAGUGCC&GGCUUACAGAACG	((((((((((.....(((&)))))))))))))
F54D11.1.1	26	41	PAO_13100	3	19	-12.09	GAAGAUGUCCUGUAAG&CUUACAGAACGCUCCUC	((.(((((.(((((((&))))))).))).)).))
Y60A3A.7.1	741	757	PAO_13100	1	19	-12.03	GACCAGUCUUGUGAGCC&GGCUUACAGAACGCUCCUC	((..(((.(((((((((&)))))))))...)))..))
B0285.4.1	837	858	PAO_13100	1	20	-11.98	GGAGGAGAGAUUCCGAAAUGCU&GGCUUACAGAACGCUCCUCU	(((((((.(.(((.(.((.(((&))))).).)))).)))))))
DH11.2.2	1178	1189	PAO_13100	1	15	-11.97	AGUGUUCCAGCC&GGCUUACAGAACGCU	(((((((.((((&))))....)))))))
F55F8.5.1	1239	1259	PAO_13100	1	19	-11.91	GAUGAUCGUAUUUUGUGUGCC&GGCUUACAGAACGCUCCUC	((.((.((..(((((((.(((&))).))))))))).)).))
F28F8.2.1	1110	1118	PAO_13100	10	18	-11.86	GGGGGUGUU&AACGCUCCU	(((((((((&)))))))))
C10H11.4.1	1572	1581	PAO_13100	2	11	-11.84	UUCUGUAGGU&GCUUACAGAA	((((((((((&))))))))))
Y50E8A.16.1	2441	2452	PAO_13100	7	19	-11.81	GAGGAGCUGAUG&CAGAACGCUCCUC	((((((((..((&))..).)))))))
F54D8.3a.1	1162	1179	PAO_13100	1	18	-11.8	AGGACACUUUGUGAAGCC&GGCUUACAGAACGCUCCU	(((((..(((((((.(((&))))))))))..).))))
K08E7.9.1	2144	2157	PAO_13100	7	20	-11.8	GGAGGAGAGAAUUG&CAGAACGCUCCUCU	(((((((.(..(((&)))..).)))))))
K08E5.1b.1	236	243	PAO_13100	13	20	-11.79	GGAGGAGC&GCUCCUCU	((((((((&))))))))
F14F7.3.1	345	362	PAO_13100	1	18	-11.77	AGGAAGUGUUUGUGAAAC&GGCUUACAGAACGCUCCU	((((.((((((((((..(&)..))))))).)))))))
F44G3.2.1	1044	1051	PAO_13100	13	20	-11.75	GGAGGAGU&GCUCCUCU	((((((((&))))))))
C34E10.6.1	654	661	PAO_13100	13	20	-11.71	GGAGGAGC&GCUCCUCU	((((((((&))))))))
K01C8.10.2	87	97	PAO_13100	9	20	-11.71	AGAGAGUGUUC&GAACGCUCCUCU	(((((((((((&))))))).))))
E03H4.7.1	1167	1176	PAO_13100	12	20	-11.64	AGAGGAGGCG&CGCUCCUCU	(((((((.((&)))))))))
C36A4.9a.1	645	657	PAO_13100	1	19	-11.63	GAGGAGCUAAACC&GGCUUACAGAACGCUCCUC	((((((((((.((&)).)))......)))))))
K11C4.4.1	1422	1440	PAO_13100	1	18	-11.57	GGGAGCGUACACUCUUGCC&GGCUUACAGAACGCUCCU	((((((((.(......(((&))).....).))))))))
R07E3.1a.1	813	832	PAO_13100	2	20	-11.55	GGAGGAGACGAGGACAAGGC&GCUUACAGAACGCUCCUCU	(((((((.((......((((&))))......)))))))))
C54G6.5.2	225	240	PAO_13100	2	19	-11.5	GAGGAGUACGGAGAGC&GCUUACAGAACGCUCCUC	(((((((.(.(.((((&)))).).)...)))))))
Y38F1A.6.1	575	587	PAO_13100	4	17	-11.5	GGAGGAUCUGUGA&UUACAGAACGCUCC	(((((.(((((((&))))))).).))))
F53A2.7.1	645	659	PAO_13100	3	18	-11.47	AGGGGCGCAAGGGAG&CUUACAGAACGCUCCU	(((((((.....(((&)))......)))))))
F43E2.5.1	19	28	PAO_13100	1	17	-11.26	GGAGCGUGCC&GGCUUACAGAACGCUCC	((((((((((&))).......)))))))
R05D8.8.1	798	809	PAO_13100	1	14	-11.24	GCGUUCUUGGCU&GGCUUACAGAACGC	(((((((.((((&))))...)))))))
C12C8.1.1	654	674	PAO_13100	1	20	-11.23	GGAGGAGGUACAUUUGAUGUC&GGCUUACAGAACGCUCCUCU	(((((((((...(((((.(((&))).).)))))).)))))))
R08F11.3.1	571	577	PAO_13100	13	19	-11.17	GAGGAGC&GCUCCUC	(((((((&)))))))
B0361.8.1	189	199	PAO_13100	2	12	-11.15	GUUUUGUGGGC&GCUUACAGAAC	(((((((((((&)))))))))))
Y73C8B.1.1	247	262	PAO_13100	2	18	-11.13	AGGCAGCGUUUGGAGC&GCUUACAGAACGCUCCU	(((.(((((((.((((&))))...))))))))))
F54D7.7.1	85	95	PAO_13100	1	20	-11.05	AGAGGAGAGCC&GGCUUACAGAACGCUCCUCU	(((((((((((&)))).........)))))))
H12C20.3a.1	963	976	PAO_13100	8	19	-10.97	GAGGAACGUGUUUU&AGAACGCUCCUC	(((((..(((((((&))))))))))))
W07B8.5.1	414	430	PAO_13100	1	16	-10.94	GGGCGUUCGCCGCUGCU&GGCUUACAGAACGCUC	((((((((......(((&))).....))))))))
F53C3.6a.1	230	245	PAO_13100	1	20	-10.93	AGGGGAGGAAGUAGUC&GGCUUACAGAACGCUCCUCU	((((((((..((((((&)))).))....).)))))))
CD4.7a.1	284	300	PAO_13100	1	16	-10.88	GAAAGUUCUGUGCAGUU&GGCUUACAGAACGCUC	((..((((((((.((((&))))))))))))..))
Y48G8AL.5a.1	1897	1912	PAO_13100	1	18	-10.81	GGGAGUGGAUUGUGCU&GGCUUACAGAACGCUCCU	(((((((..(((((((&)))..))))..)))))))
ZK697.14.1	625	643	PAO_13100	3	20	-10.76	GGGGGAGAAAAUGGAUGGG&CUUACAGAACGCUCCUCU	(((((((......(.((((&)))))......)))))))
C05E4.9a.1	1932	1946	PAO_13100	1	14	-10.65	GCCGUUCUGAAGGUC&GGCUUACAGAACGC	(.(((((((.(((((&))))).))))))))
F22E10.2.1	1446	1459	PAO_13100	4	18	-10.65	AGGAACGUCUGUAG&UUACAGAACGCUCCU	((((.(((((((((&))))))).)).))))
Y54F10AM.5.1	246	257	PAO_13100	1	15	-10.65	AGCGUUCCUGCC&GGCUUACAGAACGCU	(((((((..(((&))).....)))))))
F58F9.7.1	440	446	PAO_13100	1	7	-10.57	GUAGGCC&GGCUUAC	(((((((&)))))))
C55B7.3.1	709	727	PAO_13100	1	19	-10.47	GAAAGCGUUCAAAGAAGCU&GGCUUACAGAACGCUCCUC	((.(((((((....(((((&)))))...)))))))..))
Y49C4A.8a.1	929	938	PAO_13100	1	10	-10.4	UCUGUGGGCU&GGCUUACAGA	((((((((((&))))))))))
C15H11.3.1	1246	1252	PAO_13100	12	18	-10.38	AGGAGCG&CGCUCCU	(((((((&)))))))
F44E7.8a.1	1016	1022	PAO_13100	14	20	-10.38	AGAGGAG&CUCCUCU	(((((((&)))))))
F12E12.11.1	611	617	PAO_13100	1	7	-10.36	GUGAGCC&GGCUUAC	(((((((&)))))))
Y46H3A.2.1	2	12	PAO_13100	1	11	-10.35	UUCUGUAAGGC&GGCUUACAGAA	(((((((((.(&).)))))))))
C37H5.3a.1	1014	1031	PAO_13100	9	20	-10.34	AGAGGUUUUCAAGUGUUU&GAACGCUCCUCU	(((((......(((((((&))))))))))))
C45B11.3.1	660	676	PAO_13100	3	20	-10.32	GGAGGAGAUUCUGCAGG&CUUACAGAACGCUCCUCU	(((((((.(((((.(((&))).)))))..)))))))
F44C8.1.1	50	63	PAO_13100	1	15	-10.29	AGCGUUUCUGUUCC&GGCUUACAGAACGCU	(((((((.(((.((&))...))))))))))
C12D5.7.1	498	504	PAO_13100	14	20	-10.18	GGAGGAG&CUCCUCU	(((((((&)))))))
C12D8.11.1	1253	1278	PAO_13100	1	20	-10.17	AGAGGAGCUGCGUCGUUCUCGAAUUC&GGCUUACAGAACGCUCCUCU	((((((((......(((((..((.((&)).))..)))))))))))))
F54A5.2a.1	842	863	PAO_13100	1	19	-10.1	GAGGUGAACAUCUUCUGUAACC&GGCUUACAGAACGCUCCUC	((((.(......((((((((((&)).))))))))..).))))
F31D4.9.1	328	340	PAO_13100	9	19	-10.09	GAGUAAAGUGUUC&GAACGCUCCUC	(((...(((((((&))))))).)))
ZK632.3.1	43	55	PAO_13100	3	15	-10.08	GGCGAAUUGUGAG&CUUACAGAACGCU	((((..(((((((&)))))))..))))
F28A12.4.1	700	728	PAO_13100	1	20	-10.04	GGAGGAUUGGAUAAAAACCAUUGUGGGCC&GGCUUACAGAACGCUCCUCU	((((((.((..(.........((((((((&)))))))))..)).))))))
C06G3.1a.2	97	103	PAO_13100	14	20	-10	GGAGGAG&CUCCUCU	(((((((&)))))))
F09B12.3.1	521	527	PAO_13100	13	19	-9.99	GGGGAGC&GCUCCUC	(((((((&)))))))
C06A8.1a.1	585	591	PAO_13100	14	20	-9.95	AGAGGAG&CUCCUCU	(((((((&)))))))
F41C3.5.1	855	862	PAO_13100	13	20	-9.92	AGAGGAGU&GCUCCUCU	((((((((&))))))))
F52E4.5.1	357	374	PAO_13100	1	16	-9.88	GAGGUUUUGUUAAAUGCC&GGCUUACAGAACGCUC	((((((((((.....(((&)))..))))))).)))
F09E5.3.1	677	697	PAO_13100	1	17	-9.8	GGAAAAGAAUCUGUGAACGCC&GGCUUACAGAACGCUCC	(((...(..(((((((..(((&)))))))))).)..)))
B0399.2.1	1607	1622	PAO_13100	1	17	-9.74	GGAUGUUCUGUUUGUU&GGCUUACAGAACGCUCC	(((((((((((..(((&)))..)))))))).)))
F29G9.3.1	291	307	PAO_13100	1	17	-9.74	GGAAGUGUUUGUGAGCU&GGCUUACAGAACGCUCC	(((.(((((((((((((&))))))))).)))))))
C52E4.1.1	224	244	PAO_13100	1	20	-9.73	GGAGGAGAUGAAAUUCAAGCU&GGCUUACAGAACGCUCCUCU	(((((((.((......(((((&)))))......)))))))))
F40E10.3.1	826	834	PAO_13100	12	20	-9.65	GGAGGAGAG&CGCUCCUCU	(((((((.(&).)))))))
F41G3.10.1	607	619	PAO_13100	2	14	-9.63	GCGUUCUUAUUGC&GCUUACAGAACGC	(((((((....((&))....)))))))
W09H1.5.1	357	364	PAO_13100	1	8	-9.59	UGUGAGCU&GGCUUACA	((((((((&))))))))
W02F12.2.1	864	888	PAO_13100	2	20	-9.56	GGAGGGAAAAUUGUAUUUGUAACGC&GCUUACAGAACGCUCCUCU	((((((.....(((.(((((((.((&)))))))))))).))))))
DC2.5a.1	72	78	PAO_13100	14	20	-9.54	AGAGGAG&CUCCUCU	(((((((&)))))))
M88.1.1	1551	1567	PAO_13100	4	18	-9.43	AGGUGUUGUUUCUGUAA&UUACAGAACGCUCCU	(((.((...((((((((&)))))))).)).)))
C01G6.6a.1	2131	2144	PAO_13100	1	15	-9.42	GGUGUUCUUUAGUU&GGCUUACAGAACGCU	((((((((..((((&))))...))))))))
F59A2.3.1	843	850	PAO_13100	6	13	-9.41	UGUUCUGU&ACAGAACG	((((((((&))))))))
F28C10.3.1	847	860	PAO_13100	6	19	-9.32	GAGAGAGGUUUUGU&ACAGAACGCUCCUC	(((.((((((((((&))))))).))))))
Y46H3D.6a.1	922	928	PAO_13100	9	15	-9.27	AGCGUUC&GAACGCU	(((((((&)))))))
F59B1.8.1	408	421	PAO_13100	1	20	-9.26	GGAGGGGCUUCUCC&GGCUUACAGAACGCUCCUCU	((((((((((((((&)).....)))).))))))))
F14H8.6b.1	1763	1770	PAO_13100	1	8	-9.2	UGUGGGCU&GGCUUACA	((((((((&))))))))
C35B1.2b.1	1192	1202	PAO_13100	2	13	-9.17	CGUUUGUGAGU&GCUUACAGAACG	(((((((((((&)))))))).)))
K10D2.6.1	485	495	PAO_13100	9	19	-9.03	GUCGGGUGUUC&GAACGCUCCUC	(..((((((((&))))))))..)
F11G11.2.1	306	321	PAO_13100	1	20	-9.02	GGAGGAGGCUCAAGUC&GGCUUACAGAACGCUCCUCU	((((((((.(((((((&)))))...)).).)))))))
R11A5.4a.1	1005	1018	PAO_13100	1	14	-8.91	GUGUUCUCAUUGCU&GGCUUACAGAACGC	(((((((....(((&)))....)))))))
M60.7.1	762	771	PAO_13100	3	13	-8.79	CGUUCUGAAG&CUUACAGAACG	((((((((((&))).)))))))
C52G5.2.1	54	68	PAO_13100	4	17	-8.76	GGCGCAGUUUUGUGG&UUACAGAACGCUCC	((.((.(((((((((&))))))))))).))
F02A9.4.1	1257	1267	PAO_13100	1	13	-8.57	UGUUUUGUUCC&GGCUUACAGAACG	((((((((.((&))...))))))))
C07D10.2a.1	1369	1378	PAO_13100	1	10	-8.55	UUUGUGAGUC&GGCUUACAGA	((((((((((&))))))))))
F56B3.5.1	266	277	PAO_13100	2	14	-8.53	GUGUUCUGUAGU&GCUUACAGAACGC	((((((((((((&)).))))))))))
R07E5.13.1	292	307	PAO_13100	1	17	-8.51	GGUCGAUUUGUGAACC&GGCUUACAGAACGCUCC	((.((.(((((((.((&)).))))))).))..))
W01A8.1a.1	795	812	PAO_13100	1	19	-8.48	GAGAAGAAAACGUGGGUC&GGCUUACAGAACGCUCCUC	(((.((.....(((((((&)))))))......)).)))
C37A5.1.1	253	267	PAO_13100	2	15	-8.39	GGCGUUCUUCGUGAC&GCUUACAGAACGCU	((((((((..(((((&).))))))))))))
C14B1.3.1	101	108	PAO_13100	8	15	-8.38	AGCGUUCU&AGAACGCU	((((((((&))))))))
K06A5.6.1	417	429	PAO_13100	2	19	-8.37	GAGGAGCAAAAGC&GCUUACAGAACGCUCCUC	(((((((..((((&)))).......)))))))
C29F5.1.1	1327	1333	PAO_13100	8	14	-8.29	GUGUUCU&AGAACGC	(((((((&)))))))
F44A6.5.1	479	491	PAO_13100	4	16	-8.29	GACGUUUCUGUAA&UUACAGAACGCUC	(((((.(((((((&)))))))))).))
ZC97.1a.1	448	467	PAO_13100	1	17	-8.2	GGAAGUGUUUAUCACUGGCC&GGCUUACAGAACGCUCC	((.(((((((......((((&))))....)))))))))
F15E6.6.1	2954	2968	PAO_13108	5	19	-19.65	GAUGGGUCAGGGACU&AGUCGCUGACCCAUU	((((((((((.((((&)))).))))))))))
B0361.8.1	194	206	PAO_13108	5	18	-18.91	GUGGGCAGCGAUU&AGUCGCUGACCCAU	(((((((((((((&)))))))).)))))
ZK1320.4.1	728	744	PAO_13108	5	19	-17.91	AAUGGGUCAGACCGACU&AGUCGCUGACCCAUU	((((((((((..(((((&)))))))))))))))
C15B12.8.1	274	284	PAO_13108	6	17	-17.36	UGGGCGGCGAC&GUCGCUGACCCA	(((((((((((&))))))).))))
ZK632.3.1	607	616	PAO_13108	6	15	-17.03	GGUCGGCGAC&GUCGCUGACC	((((((((((&))))))))))
F58F9.7.1	1959	1974	PAO_13108	4	19	-16.66	GAUGGGUUUGCGAUUU&AAGUCGCUGACCCAUU	((((((((.(((((((&))))))).))))))))
K06A5.6.1	918	932	PAO_13108	1	16	-16.64	GGGCAGAGACUUAUA&UAUAAGUCGCUGACCC	((((((.((((((((&)))))))).))).)))
C55B7.4a.1	957	970	PAO_13108	2	15	-16.57	GGUCAGAGACUUAU&AUAAGUCGCUGACC	((((((.(((((((&))))))).))))))
F58B3.6.1	913	924	PAO_13108	6	16	-16.31	GGGCUCAGCGAU&GUCGCUGACCC	(((.((((((((&)))))))))))
C52B9.7a.2	70	80	PAO_13108	6	16	-16.26	GGGUCAGUUUC&GUCGCUGACCC	((((((((..(&)..))))))))
Y48G8AL.5a.1	1829	1837	PAO_13108	9	17	-16.26	UGGGUCGGC&GCUGACCCA	(((((((((&)))))))))
K08E7.9.1	1090	1107	PAO_13108	4	20	-15.88	UGAUGGGAUCAAUGGCUU&AAGUCGCUGACCCAUUA	(((((((.(((.((((((&)))))).))))))))))
F53C3.6a.1	630	641	PAO_13108	9	19	-15.75	GAUGGGUCAGAC&GCUGACCCAUU	((((((((((.(&)))))))))))
F22E10.2.1	737	750	PAO_13108	6	18	-15.48	AUGGUGUUGGUGAU&GUCGCUGACCCAU	((((.(((((((((&)))))))))))))
F18E3.7a.1	827	840	PAO_13108	4	19	-15.36	AAUGGUCAGCACUU&AAGUCGCUGACCCAUU	((((((((((((((&)))).))))))).)))
C33A12.3a.1	425	438	PAO_13108	6	19	-15	AAUGGGUUGGAAAU&GUCGCUGACCCAUU	((((((((((..((&))..))))))))))
F53F4.10.1	239	250	PAO_13108	6	17	-14.99	UGGCUCAGCGGC&GUCGCUGACCCA	(((.((((((((&)))))))).)))
R08F11.1a.1	774	790	PAO_13108	1	19	-14.92	AAUGCCAGUGACUUAUG&UAUAAGUCGCUGACCCAUU	((((.((((((((((((&))))))))))))...))))
F07F6.8.1	642	655	PAO_13108	5	19	-14.9	GAUGGGUCGCCUCU&AGUCGCUGACCCAUU	((((((((((..((&))..)).))))))))
E04A4.4c.2	266	277	PAO_13108	9	19	-14.39	AAUGGGUCAAGC&GCUGACCCAUU	(((((((((.((&)))))))))))
Y57A10C.6.1	433	446	PAO_13108	1	14	-14.37	GUCAGAGACUUAUG&UAUAAGUCGCUGAC	(((((.((((((((&)))))))).)))))
C36A4.2.1	1039	1057	PAO_13108	1	19	-14.2	AAUGGGGGAUUGACUUAUG&UAUAAGUCGCUGACCCAUU	((((((..(.(((((((((&))))))))).)..))))))
F43E2.3b.1	254	263	PAO_13108	6	15	-14.12	GGUCGGCUAC&GUCGCUGACC	(((((((.((&)).)))))))
C12D8.10a.1	253	264	PAO_13108	6	16	-14.03	GGAUGCAGCGAC&GUCGCUGACCC	((.(.(((((((&)))))))).))
D2023.2a.1	2741	2752	PAO_13108	3	14	-14.01	GUCGGUGACUUG&UAAGUCGCUGAC	((((((((((((&))))))))))))
W09H1.5.1	330	346	PAO_13108	1	17	-13.96	UGGGAAAGUGAUUAGUG&UAUAAGUCGCUGACCCA	((((..(((((((.(((&))).)))))))..))))
F28C10.3.1	234	246	PAO_13108	6	20	-13.86	UAAUGGGUGCGAU&GUCGCUGACCCAUUA	(((((((((((((&)))))..))))))))
ZC155.1.1	451	457	PAO_13108	9	15	-13.62	GGUCAGC&GCUGACC	(((((((&)))))))
F28F8.2.1	1275	1285	PAO_13108	6	16	-13.55	GGGUCAGUGAU&GUCGCUGACCC	(((((((((((&)))))))))))
F41G3.10.1	215	224	PAO_13108	4	13	-13.55	UCAGUGACUU&AAGUCGCUGA	((((((((((&))))))))))
B0272.3.1	763	776	PAO_13108	5	17	-13.46	UGAGCUCAGUGACU&AGUCGCUGACCCA	((.(.(((((((((&))))))))).)))
K11D12.3b.1	225	243	PAO_13108	8	19	-13.41	AAUGGGUCAAAAAUUUGCG&CGCUGACCCAUU	(((((((((.......(((&))))))))))))
F16B4.9.1	788	812	PAO_13108	1	18	-13.33	GUGGAGAUGUCAGUGAAAAUGUAUG&UAUAAGUCGCUGACCCAU	((((....((((((((.....((((&))))..))))))))))))
C25A1.7.1	207	227	PAO_13108	1	20	-13.3	UGGUGGACUCAACGACUUGUA&UAUAAGUCGCUGACCCAUUA	((((((..(((.(((((((((&))))))))).))).))))))
ZK822.5a.1	1136	1144	PAO_13108	6	15	-13.27	GGCAGCGGC&GUCGCUGACC	(((((((((&))))))).))
C55A6.5.1	250	271	PAO_13108	1	20	-13.21	UGAUGGGCUCAGCUUGCUGAUA&UAUAAGUCGCUGACCCAUUA	(((((((.(((((..(((.(((&))).))).))))))))))))
W07B8.5.1	575	587	PAO_13108	9	20	-13.21	UGGUGGGUCAAGC&GCUGACCCAUUA	((((((((((.((&))))))))))))
F11C1.5a.1	381	387	PAO_13108	6	12	-13.18	CAGCGAC&GUCGCUG	(((((((&)))))))
K11G9.1.1	707	722	PAO_13108	1	16	-13.13	GGAUCAGCGAUGUGUG&UAUAAGUCGCUGACCC	((.((((((((.((((&)))).)))))))).))
C47A10.1.1	1944	1953	PAO_13108	7	16	-13.05	GGAUCAGUGA&UCGCUGACCC	((.(((((((&))))))).))
ZK697.14.1	607	618	PAO_13108	5	17	-13.05	UGGGUCAAGACU&AGUCGCUGACCCA	(((((((.((((&))))..)))))))
C17C3.1a.1	582	594	PAO_13108	5	16	-13.02	GGGAGAAGUGACU&AGUCGCUGACCC	(((...(((((((&)))))))..)))
K08D9.4b.1	185	194	PAO_13108	5	15	-12.8	GGCAGCGAUU&AGUCGCUGACC	((((((((((&)))))))).))
F37B4.7.1	372	386	PAO_13108	1	17	-12.75	UGGGUCAUAUUUGUA&UAUAAGUCGCUGACCCA	(((((((.(((((((&)))))))...)))))))
F14F9.4.1	1588	1603	PAO_13108	1	19	-12.69	AAUGGAAGGACUUAUG&UAUAAGUCGCUGACCCAUU	(((((.((((((((((&)))))))).))...)))))
C14C10.3c.1	1799	1809	PAO_13108	6	15	-12.65	GGUCAGCAGUC&GUCGCUGACC	(((((((.(.(&).))))))))
F55F8.5.1	554	565	PAO_13108	7	17	-12.61	UGUGGUCGGCGG&UCGCUGACCCA	((.(((((((((&)))))))))))
Y50E8A.16.1	825	845	PAO_13108	1	19	-12.58	AGUGGUUUUCAGCUGCUUAUG&UAUAAGUCGCUGACCCAUU	(((((...(((((.(((((((&))))))).))))).)))))
F14H8.6b.1	1636	1650	PAO_13108	5	18	-12.57	AUGGUGGUGGCGAUU&AGUCGCUGACCCAU	((((.(..(((((((&)))))))..)))))
F41C3.5.1	1201	1212	PAO_13108	9	20	-12.56	UGAUGGGACAGC&GCUGACCCAUUA	(((((((.((((&)))).)))))))
F57B9.1.3	10	29	PAO_13108	2	17	-12.55	UGGGUCUCGCCACGACUUAU&AUAAGUCGCUGACCCA	((((((..((...(((((((&))))))))).))))))
C28C12.7b.1	763	774	PAO_13108	5	16	-12.54	GGGUCAGACUCU&AGUCGCUGACCC	(((((((...((&))...)))))))
E03H4.7.1	1513	1521	PAO_13108	6	14	-12.52	GUCGGCGAU&GUCGCUGAC	(((((((((&)))))))))
C47E12.1.1	775	781	PAO_13108	9	15	-12.46	GGUCAGC&GCUGACC	(((((((&)))))))
K09F6.10.1	1796	1817	PAO_13108	1	19	-12.33	AAUGGAGUAGGCAAGAUUUGUG&UAUAAGUCGCUGACCCAUU	(((((.((.(((..((((((((&))))))))))).)))))))
DH11.2.1	142	155	PAO_13108	1	14	-12.31	GUUAGUUGCUUAUG&UAUAAGUCGCUGAC	((((((.(((((((&))))))).))))))
F10E7.8a.1	1318	1341	PAO_13108	1	20	-12.31	UGAUGGCCCGUCAAAUGGCUUAUA&UAUAAGUCGCUGACCCAUUA	((((((...((((..(((((((((&))))))))).))))))))))
C05A9.1a.1	3592	3601	PAO_13108	6	15	-12.3	GGACAGUGAC&GUCGCUGACC	((.(((((((&))))))).))
VC5.5.1	872	883	PAO_13108	6	16	-12.13	GGGCUUAGCGAU&GUCGCUGACCC	(((.((((((((&)))))))))))
F54D5.12.1	1298	1311	PAO_13108	6	19	-12.07	AAUGGGUUGUCGAU&GUCGCUGACCCAUU	(((((((((.((((&)))).)))))))))
F09F7.4a.1	1120	1135	PAO_13108	6	19	-12.01	AGUGGAAUCCAGCGAC&GUCGCUGACCCAUU	(((((....(((((((&)))))))..)))))
F44A6.5.1	149	161	PAO_13108	7	20	-12.01	UAAUGGGAGGCGA&UCGCUGACCCAUUA	(((((((.(((((&)))))..)))))))
C54D10.1.1	719	734	PAO_13108	2	17	-11.98	UGCGUCGGUGAUUUAU&AUAAGUCGCUGACCCA	((.(((((((((((((&))))))))))))).))
R02E12.6.2	41	53	PAO_13108	1	16	-11.98	GGGGGCGACUGUA&UAUAAGUCGCUGACCC	(((((((((((((&))).)))))))..)))
C05C10.4.1	814	824	PAO_13108	7	18	-11.92	GUGGGUCUUGA&UCGCUGACCCAU	(((((((.(((&)))..)))))))
C49A9.8.1	532	540	PAO_13108	6	14	-11.92	GUUAGCGAU&GUCGCUGAC	(((((((((&)))))))))
D2063.1.1	184	198	PAO_13108	4	18	-11.79	GUGGCUAGGUGACUU&AAGUCGCUGACCCAU	((((...((((((((&))))))))...))))
K09A9.1.1	2365	2379	PAO_13108	6	17	-11.74	UGGGUCACAAACGAC&GUCGCUGACCCA	(((((((....((((&)))).)))))))
F09E5.3.1	840	847	PAO_13108	6	13	-11.7	UCGGCGAC&GUCGCUGA	((((((((&))))))))
M05D6.6.3	232	238	PAO_13108	9	15	-11.7	GGUCAGC&GCUGACC	(((((((&)))))))
F41B5.4.1	1339	1353	PAO_13108	5	19	-11.65	AAUGGGUAUGCAAUU&AGUCGCUGACCCAUU	(((((((..((.(((&))).))..)))))))
C07D10.2a.1	1334	1342	PAO_13108	5	13	-11.63	UCAGCGGCU&AGUCGCUGA	(((((((((&)))))))))
C10H11.6a.1	1151	1173	PAO_13108	4	19	-11.63	AAUGGGUACCUCAAACAGCUCUU&AAGUCGCUGACCCAUU	(((((((........((((.(((&)))..)))))))))))
C31E10.7.1	59	73	PAO_13108	1	13	-11.6	UCAGCAUGGCUUGUA&UAUAAGUCGCUGA	(((((..((((((((&)))))))))))))
Y53G8B.2.1	249	256	PAO_13108	10	17	-11.59	UGGGUCAG&CUGACCCA	((((((((&))))))))
Y60A3A.7.1	612	620	PAO_13108	7	15	-11.58	GGUCGGUGA&UCGCUGACC	(((((((((&)))))))))
F57C12.4.1	884	891	PAO_13108	6	13	-11.54	UCAGCGGC&GUCGCUGA	((((((((&))))))))
F21F8.11.1	1184	1205	PAO_13108	3	20	-11.49	UGAUGGGAAUUUCAGUUUCUUG&UAAGUCGCUGACCCAUUA	(((((((....(((((..((((&))))..))))))))))))
K12G11.3.1	419	429	PAO_13108	6	18	-11.48	AUGGGUUCGAU&GUCGCUGACCCAU	(((((((((((&))))..)))))))
F09F3.9.1	2068	2078	PAO_13108	10	19	-11.43	GAUGGGUACGG&CUGACCCAUU	(((((((.(((&))))))))))
C49G7.5.1	723	735	PAO_13108	6	17	-11.42	UGGAGAUAGUGAC&GUCGCUGACCCA	(((.(.(((((((&))))))).))))
Y73C8B.1.1	407	423	PAO_13108	7	20	-11.4	UAAUGGGGCAUAGCAGA&UCGCUGACCCAUUA	(((((((...((((.((&)))))).)))))))
K07E3.8.1	530	541	PAO_13108	6	19	-11.31	AAUGGUGGCGAC&GUCGCUGACCCAUU	((((((((((((&)))))))..)))))
R107.5b.1	29	35	PAO_13108	7	13	-11.23	UCAGCGA&UCGCUGA	(((((((&)))))))
C27A7.5a.1	282	289	PAO_13108	6	13	-11.18	UCAGCGAC&GUCGCUGA	((((((((&))))))))
F42E11.1a.1	817	823	PAO_13108	8	14	-11.18	GUCAGCG&CGCUGAC	(((((((&)))))))
K02A11.3.1	581	593	PAO_13108	5	17	-11.17	UGGGUUAGAUUCU&AGUCGCUGACCCA	((((((((...((&))...))))))))
F08A8.3.1	824	836	PAO_13108	1	19	-11.15	AAUGGGACUUAUA&UAUAAGUCGCUGACCCAUU	(((((((((((((&)))))))......))))))
H12C20.3a.1	1017	1026	PAO_13108	7	16	-11.12	GGGUUGGAGA&UCGCUGACCC	(((((((.((&)).)))))))
B0564.1a.1	560	566	PAO_13108	6	12	-11.02	CAGCGAC&GUCGCUG	(((((((&)))))))
C52G5.2.1	560	574	PAO_13108	5	18	-11.02	AUGGAGCAAGUGAUU&AGUCGCUGACCCAU	((((.(..(((((((&)))))))..)))))
C16A3.7.1	549	556	PAO_13108	6	14	-11	GUCAGUGC&GUCGCUGAC	((((((((&).)))))))
Y46G5A.18b.1	1323	1331	PAO_13108	5	14	-10.98	GUCAGCGCU&AGUCGCUGAC	(((((((((&)).)))))))
F56B3.5.1	423	443	PAO_13108	1	17	-10.97	UGGAGUUGGCACUGGCUUGUG&UAUAAGUCGCUGACCCA	(((.((((((...((((((((&)))))))))))))))))
M04F3.4b.1	621	640	PAO_13108	3	17	-10.93	UGGGUUAAUAAUGUGAUUUG&UAAGUCGCUGACCCA	(((((((.....((((((((&)))))))))))))))
C14B1.3.1	334	352	PAO_13108	6	19	-10.9	AGUGGAGAAGAGCAGCGAC&GUCGCUGACCCAUU	(((((.......(((((((&)))))))..)))))
K10D2.6.1	437	448	PAO_13108	6	20	-10.88	UAAUGCAGUGAC&GUCGCUGACCCAUUA	((((((((((((&)))))))...)))))
B0399.2.1	2009	2023	PAO_13108	6	16	-10.84	GGGUCCCGCAGUGGC&GUCGCUGACCC	((((....(((((((&)))))))))))
F28A10.6.1	1080	1093	PAO_13108	5	19	-10.77	GAUGUUCGGUGGCU&AGUCGCUGACCCAUU	((((.(((((((((&)))))))))..))))
F54D11.1.1	721	730	PAO_13108	4	13	-10.77	UCCGCGACUU&AAGUCGCUGA	((.(((((((&))))))).))
Y54E10A.17a.1	167	173	PAO_13108	9	15	-10.73	GGUCAGC&GCUGACC	(((((((&)))))))
C06G3.1a.1	1023	1030	PAO_13108	7	14	-10.72	GUCAGUGA&UCGCUGAC	((((((((&))))))))
F56C11.6a.1	931	939	PAO_13108	4	12	-10.7	CGGCGACUU&AAGUCGCUG	(((((((((&)))))))))
ZK896.5.1	831	848	PAO_13108	6	20	-10.7	UAAUGGAACGGCAGCGGC&GUCGCUGACCCAUUA	((((((.....(((((((&)))))))..))))))
F26D10.9a.1	1127	1134	PAO_13108	3	10	-10.69	GCGGCUUA&UAAGUCGC	((((((((&))))))))
ZC376.7a.2	5	16	PAO_13108	9	19	-10.65	GAUGUGGUUGGU&GCUGACCCAUU	((((.(((((((&)))))))))))
C30H6.7a.1	634	652	PAO_13108	1	16	-10.64	GGCGUUUUGGCGAUUUCUA&UAUAAGUCGCUGACCC	((.(((..((((((((.((&)).)))))))))))))
F14F7.3.1	456	468	PAO_13108	5	19	-10.58	GAUGGAAGCGGCU&AGUCGCUGACCCAUU	(((((.(((((((&)))))))...)))))
C31C9.1d.1	1278	1284	PAO_13108	6	12	-10.56	CAGUGAC&GUCGCUG	(((((((&)))))))
R05D8.8.1	874	889	PAO_13108	6	20	-10.53	UAAUGGGAAUGCAGGC&GUCGCUGACCCAUUA	(((((((...((.(((&)))))...)))))))
F40E10.3.1	459	466	PAO_13108	5	12	-10.44	CAGUGACU&AGUCGCUG	((((((((&))))))))
F49E12.9a.1	222	234	PAO_13108	6	18	-10.4	AUGGGUCUCGAAC&GUCGCUGACCCAU	(((((((.((.((&))))..)))))))
F59A2.3.1	176	182	PAO_13108	6	12	-10.39	CAGCGAC&GUCGCUG	(((((((&)))))))
R07E3.1a.1	678	685	PAO_13108	8	15	-10.36	GGUCAGUG&CGCUGACC	((((((((&))))))))
D2096.8.1	940	947	PAO_13108	6	13	-10.35	UCAGUGAC&GUCGCUGA	((((((((&))))))))
C02A12.4.1	626	640	PAO_13108	6	19	-10.34	AAUGUGUACAGCGGU&GUCGCUGACCCAUU	((((.((.(((((((&))))))))).))))
D1005.3.1	437	458	PAO_13108	1	19	-10.29	GAUGGGUACAAGAUGAAUUGUG&UAUAAGUCGCUGACCCAUU	(((((((.(.((.(((.(((((&))))).)))))))))))))
C37H5.13a.1	32	38	PAO_13108	9	15	-10.21	GGUCAGU&GCUGACC	(((((((&)))))))
F44C8.1.1	274	284	PAO_13108	6	16	-10.21	GGGAUGGUGAC&GUCGCUGACCC	(((.(((((((&))))))).)))
K01D12.10.1	499	519	PAO_13108	3	19	-10.21	GAUGGUAAAGGCGGCGGUGGA&UAAGUCGCUGACCCAUU	(((((....(.(((((((..(&)..))))))).))))))
F08F3.7.1	36	49	PAO_13108	1	14	-10.2	GUCGACCACUUAUA&UAUAAGUCGCUGAC	((((.(.(((((((&))))))).).))))
ZK617.2.1	278	284	PAO_13108	4	10	-10.17	GCGACUU&AAGUCGC	(((((((&)))))))
F08H9.6.1	811	823	PAO_13108	6	19	-10.15	GAUGGUUGGCCAC&GUCGCUGACCCAUU	((((((((((.((&)).))))))).)))
M60.7.1	949	963	PAO_13108	3	19	-10.13	GAUGGGUCCCGCUUG&UAAGUCGCUGACCCAUU	((((((((.((((((&)))).))..))))))))
Y51A2D.9b.1	133	139	PAO_13108	9	15	-10.05	GGUCGGC&GCUGACC	(((((((&)))))))
Y58A7A.3.1	557	563	PAO_13108	7	13	-10.05	UCAGCGA&UCGCUGA	(((((((&)))))))
Y54F10AM.5.1	688	694	PAO_13108	7	13	-9.98	UCAGCGA&UCGCUGA	(((((((&)))))))
W01A8.1a.1	806	813	PAO_13108	11	18	-9.97	GUGGGUCA&UGACCCAU	((((((((&))))))))
C37A5.1.1	569	576	PAO_13108	6	13	-9.96	UCGGCGAU&GUCGCUGA	((((((((&))))))))
C06A8.1a.1	891	903	PAO_13108	5	18	-9.87	AUGGGUUAUGAGU&AGUCGCUGACCCAU	(((((((((((.(&).))).))))))))
C01G6.6a.1	286	298	PAO_13108	5	15	-9.84	GGUCUCGGCGAUU&AGUCGCUGACC	((((..(((((((&)))))))))))
C01B12.3.1	1211	1223	PAO_13108	6	18	-9.79	GUGGGUCUGAAAC&GUCGCUGACCCAU	(((((((.(..((&))..).)))))))
C29F5.1.1	1224	1237	PAO_13108	4	16	-9.79	GGAGUCCGUGAUUU&AAGUCGCUGACCC	((.(((.(((((((&))))))).)))))
K08E5.1b.1	200	212	PAO_13108	6	19	-9.76	AAUGGGUUUUGAU&GUCGCUGACCCAUU	((((((((.((((&))))..))))))))
F13C5.1.1	447	460	PAO_13108	6	19	-9.73	AAUCGAGCAGCGAC&GUCGCUGACCCAUU	(((.(..(((((((&)))))))..).)))
Y22D7AL.5a.1	1685	1691	PAO_13108	13	19	-9.71	AAUGGGU&ACCCAUU	(((((((&)))))))
Y82E9BR.18.1	2659	2667	PAO_13108	5	13	-9.63	UCGGCGAUU&AGUCGCUGA	(((((((((&)))))))))
K02F2.2.1	103	117	PAO_13108	2	19	-9.61	GAUGCCAGGACUUAU&AUAAGUCGCUGACCCAUU	((((.((((((((((&))))))).)))...))))
W03G1.5.1	15	22	PAO_13108	5	12	-9.61	CAGUGACU&AGUCGCUG	((((((((&))))))))
H06H21.6.1	455	461	PAO_13108	7	13	-9.6	UCAGCGA&UCGCUGA	(((((((&)))))))
Y50D4B.2a.1	441	457	PAO_13108	1	19	-9.55	AGUGGUGGCUACUUGUA&UAUAAGUCGCUGACCCAUU	(((((.(((.(((((((&))))))).)))...)))))
C54G7.2.1	884	900	PAO_13108	1	17	-9.54	UGGAUUCAGUGGUUAUG&UAUAAGUCGCUGACCCA	(((..((((((((((((&))))).))))))).)))
C12D5.7.1	1070	1080	PAO_13108	8	18	-9.51	GUGGGUUGCCG&CGCUGACCCAU	((((((((.((&)).))))))))
K02E11.10.1	346	352	PAO_13108	13	19	-9.5	GGUGGGU&ACCCAUU	(((((((&)))))))
C44B7.10.1	1353	1359	PAO_13108	8	14	-9.39	GUCAGCG&CGCUGAC	(((((((&)))))))
B0285.4.1	263	270	PAO_13108	5	12	-9.38	CAGCGGCU&AGUCGCUG	((((((((&))))))))
C27H6.4c.5	118	124	PAO_13108	9	15	-9.37	GGUCAGU&GCUGACC	(((((((&)))))))
Y73F4A.2.1	730	736	PAO_13108	8	14	-9.37	GUCAGCG&CGCUGAC	(((((((&)))))))
C06H2.1.1	22	31	PAO_13108	6	16	-9.33	GGGUAGCGAC&GUCGCUGACCC	((((((((((&))))))).)))
W02D3.7.1	30	49	PAO_13108	2	18	-9.31	GUGGGUCGUUGGAAGCUUGU&AUAAGUCGCUGACCCAU	(((((((...((..((((((&))))))..)))))))))
F12E12.11.1	837	857	PAO_13108	1	20	-9.3	UGAUGGGAAUGCAGGCUCAUG&UAUAAGUCGCUGACCCAUUA	(((((((...((.((((.(((&))).))))))...)))))))
E02H1.3.1	678	688	PAO_13108	6	15	-9.24	GGUCGGUGAGC&GUCGCUGACC	(((((((((.(&))))))))))
F09B12.3.1	1366	1380	PAO_13108	3	19	-9.2	AAUGUUCACGACUUG&UAAGUCGCUGACCCAUU	((((.((((((((((&))))))).)))..))))
F54A5.2a.1	574	580	PAO_13108	6	12	-9.16	CGGCGAC&GUCGCUG	(((((((&)))))))
F52E4.5.1	143	159	PAO_13108	4	16	-9.12	GGGACAUCGCGUGGCUU&AAGUCGCUGACCC	(((...(((.(((((((&)))))))))))))
Y49C4A.8a.1	1102	1116	PAO_13108	5	19	-9.05	AAUUGGAUGGUGACU&AGUCGCUGACCCAUU	(((.((.((((((((&)))))))).)).)))
R04B5.6.1	250	258	PAO_13108	6	14	-9.03	GUUGGUGAC&GUCGCUGAC	(((((((((&)))))))))
ZC97.1a.1	546	563	PAO_13108	7	19	-9	AAUGGACGAAGUCGGUGA&UCGCUGACCCAUU	(((((.....((((((((&)))))))))))))
C15C8.3a.1	317	329	PAO_13108	6	18	-8.99	GUGGGUCCCAGAU&GUCGCUGACCCAU	(((((((...(((&)))...)))))))
B0205.6.1	911	922	PAO_13108	6	16	-8.97	GGAAUCAGUGAU&GUCGCUGACCC	((..((((((((&)))))))).))
C06E7.1a.1	370	379	PAO_13108	6	15	-8.94	GGAUAGUGAC&GUCGCUGACC	((.(((((((&))))))).))
C08F8.2b.1	1245	1260	PAO_13108	3	19	-8.94	AAUGGGUUUGAACUUG&UAAGUCGCUGACCCAUU	((((((((...(((((&)))))....))))))))
R03D7.1.1	1728	1744	PAO_13108	1	19	-8.88	AAUGGAAGCGAUUCGUG&UAUAAGUCGCUGACCCAUU	(((((.(((((((.(((&))).)))))))...)))))
C05E4.9a.1	2546	2554	PAO_13108	9	18	-8.75	AUGGGUUGC&GCUGACCCAU	(((((((((&)).)))))))
F57B10.3a.1	526	537	PAO_13108	2	15	-8.75	GGCCGGACUUGU&AUAAGUCGCUGACC	(((.((((((((&))))))).).).))
C35B1.2b.1	1482	1501	PAO_13108	7	19	-8.71	GAUGGUCAACGUGUUGGUGA&UCGCUGACCCAUU	(((((.......((((((((&)))))))))))))
F40F4.4a.1	442	457	PAO_13108	4	18	-8.71	AUGGCUGAGGCGGCUU&AAGUCGCUGACCCAU	((((....((((((((&))))))))...))))
R11A5.4c.3	171	184	PAO_13108	1	14	-8.7	GUCAGCGGCUGGUA&UAUAAGUCGCUGAC	((((((((((.(((&))).))))))))))
F31D4.9.1	156	166	PAO_13108	3	13	-8.65	UCACCGACUUA&UAAGUCGCUGA	(((.(((((((&))))))).)))
C01B10.11.1	476	489	PAO_13108	1	13	-8.6	UCAGGGAACUUAUG&UAUAAGUCGCUGA	((((.(.(((((((&)))))))).))))
W08D2.4b.2	82	88	PAO_13108	13	19	-8.56	AAUGGGU&ACCCAUU	(((((((&)))))))
ZK455.1.1	751	758	PAO_13108	6	13	-8.54	UCAGUGAU&GUCGCUGA	((((((((&))))))))
K01C8.10.1	459	470	PAO_13108	2	12	-8.53	CAGUCGAUUUGU&AUAAGUCGCUG	(((.((((((((&)))))))))))
F22B5.4.1	279	291	PAO_13108	1	15	-8.44	GGUCACGCUUAUG&UAUAAGUCGCUGACC	(((((.(((((((&)))))))...)))))
M117.2a.2	826	836	PAO_13108	3	13	-8.41	UUUCCGACUUA&UAAGUCGCUGA	((..(((((((&)))))))..))
C34C12.8.1	321	335	PAO_13108	7	19	-8.37	AAUGUUCGUCGGCGA&UCGCUGACCCAUU	((((...((((((((&)))))))).))))
Y37E3.9.1	27	34	PAO_13108	9	17	-8.28	UGGGUCGC&GCUGACCCA	((((((((&).)))))))
F53A2.7.1	474	481	PAO_13108	6	13	-8.26	UCAGCGAU&GUCGCUGA	((((((((&))))))))
R07E5.2.1	368	375	PAO_13108	6	13	-8.21	UCGGUGAU&GUCGCUGA	((((((((&))))))))
C29F7.2a.1	1124	1132	PAO_13108	5	13	-8.19	UCGGCGAGU&AGUCGCUGA	(((((((.(&).)))))))
C05D11.11a.1	496	505	PAO_13108	4	13	-8.16	UCUGCGACUU&AAGUCGCUGA	((.(((((((&))))))).))
F32D8.12a.1	776	782	PAO_13108	6	12	-8.05	CAGUGGC&GUCGCUG	(((((((&)))))))
F28A12.4.1	3	9	PAO_13108	13	19	-8.01	AAUGGGU&ACCCAUU	(((((((&)))))))
C05A9.1a.1	3577	3599	PAO_13111	2	22	-21.59	AGCGACGAGUGCUCUGGACAGUG&CACUUUCCAGAGCGUUCCGCU	((((..((((((((((((.((((&)))).))))))))))))))))
F11C1.5a.1	4282	4300	PAO_13111	1	22	-19.54	AGCGGAUGACUGGAGGGGC&GCACUUUCCAGAGCGUUCCGCU	((((((((.((((((((((&)).))))))))..)).))))))
F14F9.4.1	2615	2630	PAO_13111	3	18	-19.35	GAACACUUUGGAAAGU&ACUUUCCAGAGCGUUC	((((.(((((((((((&))))))))))).))))
F53A2.7.1	77	105	PAO_13111	1	25	-19.31	UUUGGUGGAAAGCUGAAAGGAUUGAGUGC&GCACUUUCCAGAGCGUUCCGCUAAA	((((((((((.(((....(((..((((((&)))))))))..))).))))))))))
Y22D7AL.5a.1	1671	1692	PAO_13111	2	22	-19.14	GGUGGAAUGGGUGGAAUGGGUG&CACUUUCCAGAGCGUUCCGCU	(((((((((..(((((..((((&)))))))))...)))))))))
B0361.8.1	1327	1349	PAO_13111	1	22	-19.11	AGCGGAAUGACACUAGAAAGUAC&GCACUUUCCAGAGCGUUCCGCU	(((((((((.(.((.((((((.(&).)))))).)).))))))))))
H06H21.6.1	750	768	PAO_13111	6	25	-19.1	UUUGGUGGAGGCUCUGGAA&UUCCAGAGCGUUCCGCUAAA	(((((((((((((((((((&))))))))).))))))))))
F14F7.3.1	206	224	PAO_13111	1	19	-18.83	GGAAGCGCUUUGGAAAUGU&GCACUUUCCAGAGCGUUCC	((((.((((((((((((((&))).)))))))))))))))
Y53G8B.2.1	1041	1073	PAO_13111	1	22	-18.83	AGCGGAAAAUUUGAAAUGUUCUGUGAAAAGUGC&GCACUUUCCAGAGCGUUCCGCU	((((((.........((((((((.(.(((((((&))))))))))))))))))))))
C16A3.7.1	1511	1527	PAO_13111	4	21	-18.77	GUGGAACUCCUGGAAAG&CUUUCCAGAGCGUUCCGC	(((((((.(((((((((&)))))))).).)))))))
W07B8.5.1	1003	1022	PAO_13111	4	21	-18.72	GUGGAACGUCGCCUGGGGAG&CUUUCCAGAGCGUUCCGC	(((((((((...((((((((&)))))))).)))))))))
F11G11.2.1	282	300	PAO_13111	1	20	-18.63	CGGAAUCAAUGGAAAGUGU&GCACUUUCCAGAGCGUUCCG	(((((((..((((((((((&))))))))))..).))))))
F15E6.6.1	2639	2657	PAO_13111	1	21	-18.52	GCGGGAAGUUGGGAAGAGC&GCACUUUCCAGAGCGUUCCGC	((((((.(((((((((.((&)).)))))))..)).))))))
R03D7.1.1	3515	3535	PAO_13111	1	22	-18.44	AGCGAACUCUUUGGAAGCUGC&GCACUUUCCAGAGCGUUCCGCU	(((((((.(((((((((.(((&))).))))))))).))).))))
B0205.13.1	354	371	PAO_13111	2	21	-18.11	GUGGAACUUUUGGAAGUG&CACUUUCCAGAGCGUUCCGC	((((((((((((((((((&))))).)))))).)))))))
F56B3.5.1	400	419	PAO_13111	2	20	-18.04	CGGAUUUGCACUGGGAGGUG&CACUUUCCAGAGCGUUCCG	((((..(((.((((((((((&)))))))))).))).))))
F12E12.1.1	277	290	PAO_13111	6	19	-17.83	GGGAUGCUCUGGAG&UUCCAGAGCGUUCC	((((((((((((((&))))))))))))))
Y53F4B.33.1	328	347	PAO_13111	4	23	-17.63	UGGCUCAACGCUCCGGAAAG&CUUUCCAGAGCGUUCCGCUA	((((..(((((((.((((((&)))))).)))))))..))))
F41G3.10.1	504	520	PAO_13111	7	21	-17.56	GCGGAUACUGCUCUGGA&UCCAGAGCGUUCCGC	(((((.((.((((((((&)))))))))))))))
F28C10.3.1	196	215	PAO_13111	1	22	-17.54	AGCGGAGCAUAUGGAGAGGU&GCACUUUCCAGAGCGUUCCGCU	((((((((...(((((((((&)).)))))))....))))))))
C14A4.14.1	1130	1150	PAO_13111	2	23	-17.49	UGGUGAAGAGUGAGGGAAGUG&CACUUUCCAGAGCGUUCCGCUA	(((((.((.((..((((((((&))))))))...)).)).)))))
F57C12.4.1	3453	3474	PAO_13111	1	22	-17.47	AGCUGAAACGUCUGGAAUCUGC&GCACUUUCCAGAGCGUUCCGCU	(((.(((.(((((((((..(((&)))..))))))).))))).)))
F42E11.1a.1	2163	2172	PAO_13111	1	10	-17.36	UGGAAAGUGC&GCACUUUCCA	((((((((((&))))))))))
C47A10.1.1	809	825	PAO_13111	1	20	-17.35	CGAGGAUGCUCUGGAGC&GCACUUUCCAGAGCGUUCCG	((.((((((((((((((&))....))))))))))))))
C06A8.1a.1	1191	1201	PAO_13111	1	11	-17.28	CUGGAAAGUGU&GCACUUUCCAG	(((((((((((&)))))))))))
F09B12.3.1	705	714	PAO_13111	1	10	-17.04	UGGAAAGUGC&GCACUUUCCA	((((((((((&))))))))))
R08F11.1a.1	1737	1761	PAO_13111	1	28	-17.04	GAUUGUGGACGGGGCGUUGGAGUGC&GCACUUUCCAGAGCGUUCCGCUAAAAUC	((((.(((.((((((((((((((((&)))))))....)))))))))))).))))
C55B7.4b.3	320	332	PAO_13111	7	20	-16.84	CGGAGGCUCUGGA&UCCAGAGCGUUCCG	(((((((((((((&)))))))).)))))
C29F5.1.1	559	575	PAO_13111	4	21	-16.76	GUGAACGCGUUGGAAAG&CUUUCCAGAGCGUUCCGC	((((((((.((((((((&)))))))).))))).)))
C17C3.1d.1	223	242	PAO_13111	1	20	-16.74	CGGAAACUCAUGGGAGGUGC&GCACUUUCCAGAGCGUUCCG	(((((.(((.((((((((((&)))))))))))))..)))))
K01D12.10.1	366	390	PAO_13111	4	23	-16.73	UAGUGGAUCAGGAAGUUCUGGAGGG&CUUUCCAGAGCGUUCCGCUA	(((((((.......(((((((((((&)))))))))))..)))))))
W03G1.5.1	582	596	PAO_13111	3	18	-16.66	GAGCGUUCUGGAAGU&ACUUUCCAGAGCGUUC	(((((((((((((((&))).))))))))))))
K08E5.1b.1	737	756	PAO_13111	1	19	-16.46	GGAACGCGUCAAGAAAGAGC&GCACUUUCCAGAGCGUUCC	(((((((.((..(((((.((&)).)))))..)))))))))
F21F8.11.1	348	371	PAO_13111	3	23	-16.39	UGGUGGAACGUUCAUCUGGUCAGU&ACUUUCCAGAGCGUUCCGCUA	(((((((((((...(((((..(((&)))..))))))))))))))))
Y82E9BR.18.1	1282	1306	PAO_13111	1	28	-16.39	GAUGAAGCUGAGGUUUUGAAGGUGC&GCACUUUCCAGAGCGUUCCGCUAAAAUC	(((..(((.((((((((((((((((&))))))).)))))).))).)))...)))
Y73C8B.1.1	417	437	PAO_13111	1	23	-16.32	UAGCAGAGGGUGUGAAAGUGC&GCACUUUCCAGAGCGUUCCGCUA	((((.(((.((..((((((((&))))))))....)).))).))))
F57B10.3a.1	472	498	PAO_13111	1	28	-16.27	GAGCUUGGUGGAUGCUUGCGAUCGUGC&GCACUUUCCAGAGCGUUCCGCUAAAAUC	((..(((((((((((((..((..((((&))))..))..)))))).)))))))..))
C12D5.7.1	1139	1158	PAO_13111	1	18	-16.24	GGAUGCUCAGAGGAAAAUGC&GCACUUUCCAGAGCGUUC	((((((((...(((((.(((&))).))))).))))))))
D2063.1.1	135	166	PAO_13111	1	26	-16.1	UUUUGGUGAAAAUGGAAUAUUCUGGAAUAUGC&GCACUUUCCAGAGCGUUCCGCUAAAA	(((((((......(((((.((((((((..(((&)))..)))))))).))))))))))))
F54D8.3a.1	1102	1114	PAO_13111	4	15	-16.05	CGCUGCUGGAAAG&CUUUCCAGAGCG	((((.((((((((&))))))))))))
C10H11.6a.1	199	220	PAO_13111	4	24	-16.02	UUGGCGGAUACGCUCACCGAAG&CUUUCCAGAGCGUUCCGCUAA	((((((((.((((((...((((&))))...))))))))))))))
F44C4.3.1	945	963	PAO_13111	4	20	-15.91	UGGAACGUCAACUGGGGAG&CUUUCCAGAGCGUUCCG	((((((((...((((((((&)))))))).))))))))
C30H6.7a.1	742	758	PAO_13111	1	19	-15.7	GGAAUGUUCGGAAGUGU&GCACUUUCCAGAGCGUUCC	(((((((((((((((((&)))))).)).)))))))))
F10E7.8a.1	469	478	PAO_13111	1	10	-15.56	UGGAAAGUGC&GCACUUUCCA	((((((((((&))))))))))
F22E10.2.1	2094	2113	PAO_13111	5	22	-15.5	GGACGAGAUUGCUUUGGAAA&UUUCCAGAGCGUUCCGCU	((.((.((.(((((((((((&))))))))))).))))))
F43C1.7.1	337	359	PAO_13111	4	24	-15.45	UUAAAGGAAUGCAGACAGGAGAG&CUUUCCAGAGCGUUCCGCUAA	(((..(((((((...(.((((((&)))))).).)))))))..)))
C05C10.3.1	376	398	PAO_13111	6	24	-15.43	UUAGCGGAGAGCUCGAGUUGGAA&UUCCAGAGCGUUCCGCUAA	(((((((((.((((....(((((&))))))))).)))))))))
B0285.4.1	803	819	PAO_13111	1	16	-15.36	ACGGUCUGGAAAUGUGU&GCACUUUCCAGAGCGU	(((.((((((((.((((&)))))))))))).)))
E02H1.3.1	1245	1262	PAO_13111	4	21	-15.28	GUGUGAAAGCCUGGAGAG&CUUUCCAGAGCGUUCCGC	(((.(((.((((((((((&)))))))).)).))))))
E03H4.7.1	1268	1285	PAO_13111	3	20	-15.27	CGGGGCUUGCUGGAAAGU&ACUUUCCAGAGCGUUCCG	((((((...(((((((((&)))))))))...))))))
F37B4.7.1	132	140	PAO_13111	2	10	-15.27	UGGAAAGUG&CACUUUCCA	(((((((((&)))))))))
Y50D4B.2b.1	106	120	PAO_13111	4	21	-15.19	GCGGUUGCUGGAAGG&CUUUCCAGAGCGUUCCGC	((((.((((((((((&)))))))..)))..))))
R53.4.1	305	322	PAO_13111	3	21	-15.16	GCGCAAUAUCUGGAGAGU&ACUUUCCAGAGCGUUCCGC	(((.(((.((((((((((&))))))))))..))).)))
F52E4.5.1	30	46	PAO_13111	5	21	-15.14	GCUGAAGGUUUUGGAAA&UUUCCAGAGCGUUCCGC	((.(((.((((((((((&)))))))))).))).))
F16B4.9.1	546	564	PAO_13111	4	22	-15.11	AGCUAAACAAUCUGGAAAG&CUUUCCAGAGCGUUCCGCU	(((..(((..(((((((((&)))))))))..)))..)))
C36A4.2.1	568	585	PAO_13111	1	17	-15.06	GAUGUGAUUGGAAAGUGU&GCACUUUCCAGAGCGUU	(((((..(((((((((((&))))))))))).)))))
F57B9.6a.1	1120	1132	PAO_13111	7	20	-14.89	CGGACGUUCUGGA&UCCAGAGCGUUCCG	(((((((((((((&))))))))).))))
F14H8.6b.1	588	617	PAO_13111	1	26	-14.82	UUUUGGUGGAAUUGUAUUCAGGAUAUAUGC&GCACUUUCCAGAGCGUUCCGCUAAAA	(((((((((((.(((..((.(((....(((&)))...))).))))))))))))))))
Y58A7A.3.1	2578	2593	PAO_13111	3	18	-14.81	GAGCAUUCUGGAAAGU&ACUUUCCAGAGCGUUC	((((.(((((((((((&))))))))))).))))
F55F8.5.1	308	330	PAO_13111	2	22	-14.8	AGUGGAAUGCGUAAUUGGAAUUG&CACUUUCCAGAGCGUUCCGCU	((((((((((.....(((((.((&))..)))))..))))))))))
F41B5.2.1	315	331	PAO_13111	6	23	-14.74	UGGUGGAAUCUUUGGAA&UUCCAGAGCGUUCCGCUA	(((((((((((((((((&)))))))).)))))))))
F54D11.1.1	966	983	PAO_13111	6	24	-14.71	UUGGCAAUCGCUUUGGAA&UUCCAGAGCGUUCCGCUAA	(((((...((((((((((&))))))))))....)))))
VC5.5.1	422	432	PAO_13111	1	11	-14.71	CUGGAAAGUGU&GCACUUUCCAG	(((((((((((&)))))))))))
F40E10.3.1	926	941	PAO_13111	5	21	-14.69	GCUGGAACCCUGGAAA&UUUCCAGAGCGUUCCGC	((.(((((((((((((&))))))).).)))))))
C27B7.1a.1	843	862	PAO_13111	4	22	-14.67	AGCGGAGGGUGAAGAAGAAG&CUUUCCAGAGCGUUCCGCU	(((((((.((......((((&)))).....)).)))))))
K02A11.3.1	556	575	PAO_13111	1	23	-14.64	UGGUGAAAUCUCUGGAAUGC&GCACUUUCCAGAGCGUUCCGCUA	(((((.((((((((((((((&)))..)))))))).))).)))))
K07C5.4.1	50	71	PAO_13111	4	22	-14.64	AGCUGGAUACGCUCUCAUGAAG&CUUUCCAGAGCGUUCCGCU	(((.(((.(((((((...((((&))))..)))))))))))))
Y48G8AL.5a.1	1095	1113	PAO_13111	4	22	-14.33	AGUGGAAGGUUUUUGAUAG&CUUUCCAGAGCGUUCCGCU	(((((((.(((((.((.((&)).)).))))).)))))))
R07E5.13.1	437	455	PAO_13111	10	26	-14.32	UUUUAGCGGGUUUCGCUCU&AGAGCGUUCCGCUAAAA	((((((((((...((((((&)))))).))))))))))
C02A12.4.1	774	785	PAO_13111	1	11	-14.27	CUGGAAAUGUGC&GCACUUUCCAG	(((((((.((((&)))))))))))
ZK617.2.1	252	269	PAO_13111	6	22	-14.27	AGCUGGAAGUCUCUGGAA&UUCCAGAGCGUUCCGCU	(((.((((..((((((((&))))))))..)))))))
K12G11.3.1	181	198	PAO_13111	1	18	-14.26	GAAUACUCUGGAAUUUGC&GCACUUUCCAGAGCGUUC	((((.((((((((..(((&)))..)))))))).))))
C01G6.6a.2	153	162	PAO_13111	7	16	-14.22	ACGCUCUGGA&UCCAGAGCGU	((((((((((&))))))))))
C07G3.2.1	487	506	PAO_13111	4	22	-14.16	AGAUGAACGAAACUGGAGAG&CUUUCCAGAGCGUUCCGCU	((..(((((...((((((((&))))))))..)))))..))
F53F4.10.1	82	99	PAO_13111	4	22	-14.01	GGCGGAGCUACUGGAUUG&CUUUCCAGAGCGUUCCGCU	((((((((..(((((..(&)..)))))...))))))))
R11A5.4a.1	1453	1475	PAO_13111	1	20	-14.01	CGGAGAGUACUUCUGGGAGGGAC&GCACUUUCCAGAGCGUUCCG	(((((.((...(((((((((..(&)..))))))))))).)))))
C27A7.5a.1	2092	2110	PAO_13111	10	23	-13.99	UGGCGGAACACCAAGCUCU&AGAGCGUUCCGCUA	(((((((((.....(((((&))))))))))))))
C14C10.3c.1	1714	1731	PAO_13111	1	20	-13.94	CAGAACGAUUUGGAAUGC&GCACUUUCCAGAGCGUUCCG	(.(((((.((((((((((&)))..))))))).))))).)
ZC376.7d.2	26	36	PAO_13111	4	14	-13.88	GUUCUGGGAGG&CUUUCCAGAGC	(((((((((((&)))))))))))
C35B1.2a.1	201	214	PAO_13111	4	18	-13.83	GAAAGCCUGGAAGG&CUUUCCAGAGCGUUC	(((.((((((((((&)))))))).)).)))
F09F3.9.1	1300	1316	PAO_13111	5	22	-13.83	GGUGGGGCUACUGGAGA&UUUCCAGAGCGUUCCGCU	((((((((..(((((((&)))))))...))))))))
F09E5.3.1	746	760	PAO_13111	4	18	-13.67	GAGCUCACUGGAAAG&CUUUCCAGAGCGUUC	((((.(.((((((((&)))))))).).))))
K02E11.10.1	698	720	PAO_13111	3	22	-13.67	AGCAGGGACCAGCUCAGGGAGGU&ACUUUCCAGAGCGUUCCGCU	(((.(((((..((((.(((((((&))))))).))))))))))))
B0399.2.1	395	409	PAO_13111	13	27	-13.64	GUUUUGGUGGGAUGU&GCGUUCCGCUAAAAU	(((((((((((((((&)))))))))))))))
K11C4.4.1	586	597	PAO_13111	11	21	-13.58	GCGGAACGUAUC&GAGCGUUCCGC	(((((((((.((&)))))))))))
C29F7.2a.1	172	188	PAO_13111	4	21	-13.52	GCGGAGCACGAGGAGAG&CUUUCCAGAGCGUUCCGC	(((((((.(..((((((&))))))...).)))))))
D2023.2a.1	869	885	PAO_13111	10	27	-13.48	AUUUUGGCAGACGCUCU&AGAGCGUUCCGCUAAAAU	((((((((.((((((((&))))))).).))))))))
ZK697.14.1	619	646	PAO_13111	4	28	-13.44	GAUAUGGGGGGAGAAAAUGGAUGGGAAG&CUUUCCAGAGCGUUCCGCUAAAAUC	(((...((.(((....(((..(((((((&)))))))...)))))).))...)))
Y46G5A.18a.1	312	327	PAO_13111	7	22	-13.43	AGUGGAGACGUGUGGA&UCCAGAGCGUUCCGCU	(((((((.(((.((((&))))..))))))))))
E04A4.4a.1	1185	1198	PAO_13111	1	14	-13.4	GCUGUGGAAAGUGU&GCACUUUCCAGAGC	(((.((((((((((&)))))))))).)))
H12C20.3a.1	1009	1030	PAO_13111	1	22	-13.36	AGAAGGACGGGUUGGAGAAAGC&GCACUUUCCAGAGCGUUCCGCU	((..(((((..(((((((..((&))..)))))))..)))))..))
C54G7.2.1	258	272	PAO_13111	3	17	-13.35	AAUGCACUGGGAAGU&ACUUUCCAGAGCGUU	(((((.(((((((((&))))))))).)))))
Y71F9B.4.1	77	92	PAO_13111	6	20	-13.35	CGUCGCGUCUCUGGAA&UUCCAGAGCGUUCCG	((..(((.((((((((&)))))))))))..))
W09H1.5.1	332	339	PAO_13111	2	9	-13.33	GGAAAGUG&CACUUUCC	((((((((&))))))))
F54D5.11.1	215	239	PAO_13111	7	22	-13.29	AGCGAAAAAGAAGAAAAGCUCUGGA&UCCAGAGCGUUCCGCU	((((........(((..((((((((&)))))))).)))))))
K08D9.4a.1	858	877	PAO_13111	3	22	-13.29	AGCAGAAAAUAAUGGAAAGU&ACUUUCCAGAGCGUUCCGCU	(((.(((.....((((((((&)))))))).....))).)))
K11D12.3a.1	1071	1092	PAO_13111	1	23	-13.28	UGGUGGACCGCUCGCUAAAGUC&GCACUUUCCAGAGCGUUCCGCUA	(((((((.(((((...((((((&).)))))...))))).)))))))
D2096.8.1	676	696	PAO_13111	3	22	-13.27	AGGGAGCUAAUGCUGGAAAGU&ACUUUCCAGAGCGUUCCGCU	(((((((.....(((((((((&)))))))))...))))).))
F22B5.4.1	427	447	PAO_13111	1	21	-13.25	GUGACACGUACUGGAAGAUGC&GCACUUUCCAGAGCGUUCCGC	(((..((((.(((((((.(((&))).))))))).))))..)))
R107.5a.1	204	219	PAO_13111	5	22	-13.25	AGCGCCUGCCUGGAAA&UUUCCAGAGCGUUCCGCU	((((..((((((((((&))))))).)))...))))
C06E7.1a.1	816	837	PAO_13111	1	19	-13.23	GGGGAGCUCACGGAGGAGGUGC&GCACUUUCCAGAGCGUUCC	((((.((((...(.((((((((&))))))))).)))).))))
C08F8.2b.1	617	632	PAO_13111	1	17	-13.22	AACGUUUUGGUGAGGC&GCACUUUCCAGAGCGUU	((((((((((.(((((&)).))).))))))))))
C37A5.1.1	74	96	PAO_13111	1	23	-13.18	UGGCGGGGCUCCGUCUGGAAGUC&GCACUUUCCAGAGCGUUCCGCUA	(((((((((.(..((((((((((&).)).)))))))).)))))))))
C47E12.1.1	555	580	PAO_13111	1	23	-13.17	UGGUUGAUGGCUUUGAUGGAGAGCGC&GCACUUUCCAGAGCGUUCCGCUA	((((.((..((((...(((((((.((&)).)))))))))))..)).))))
F56C11.6a.1	632	653	PAO_13111	1	22	-13.17	GGUGGAGCAUCUGUGGAUCUGC&GCACUUUCCAGAGCGUUCCGCU	((((((((.((((.(((..(((&)))..)))))))..))))))))
C05D11.11a.1	76	101	PAO_13111	3	27	-13.09	AUUUUGGUGGACCAUGUUGAGAAAGU&ACUUUCCAGAGCGUUCCGCUAAAAU	(((((((((((..(((((..((((((&))))))...))))))))))))))))
F58B3.1.1	568	588	PAO_13111	1	23	-13.09	UAGUUUGAUGCUCUGGUGGGC&GCACUUUCCAGAGCGUUCCGCUA	((((..((((((((((.((((&)).))..))))))))))..))))
Y73C8C.2.1	303	322	PAO_13111	4	23	-13.09	UAGCGGACAAUUUUGGAUAG&CUUUCCAGAGCGUUCCGCUA	(((((((...(((((((.((&)).)))))))...)))))))
Y105E8A.4.1	359	371	PAO_13111	1	11	-13.08	CUGGAGAGAAUGC&GCACUUUCCAG	((((((((..(((&)))))))))))
Y46H3A.2.1	52	75	PAO_13111	1	22	-13.08	AGCCAACACGCUUUGUUCUAGUGC&GCACUUUCCAGAGCGUUCCGCU	(((....((((((((....(((((&)))))...))))))))...)))
K08E7.9.1	2147	2167	PAO_13111	1	19	-13.02	GGAGAGAAUUGGAAAAGAUGC&GCACUUUCCAGAGCGUUCC	((((.(..(((((((.(.(((&)))))))))))..).))))
R04B5.6.1	186	215	PAO_13111	1	28	-13.02	GGUUUUAGGCCAUGAGAGUUCUGGAGUUGU&GCACUUUCCAGAGCGUUCCGCUAAAAUC	((((((((.(...(((.(((((((((.(((&)))..))))))))).))).)))))))))
DH11.2.1	415	428	PAO_13111	11	23	-12.91	UAGUGGAACAGCUU&GAGCGUUCCGCUA	(((((((((.((((&)))))))))))))
W02F12.2.1	59	66	PAO_13111	1	8	-12.9	GAAAGUGC&GCACUUUC	((((((((&))))))))
C31C9.1a.1	461	476	PAO_13111	8	23	-12.89	UGGUGGAAUGUUAAGG&CCAGAGCGUUCCGCUA	((((((((((((..((&))..))))))))))))
F49E8.5.1	653	677	PAO_13111	1	21	-12.84	GCUGGUAUUGCCAAUUGGGGAGUGU&GCACUUUCCAGAGCGUUCCGC	((.((...(((...(((((((((((&))))))))))).)))..))))
C15B12.8.1	36	57	PAO_13111	1	22	-12.82	AGCCGGUAUUUUUGGAUCGUGC&GCACUUUCCAGAGCGUUCCGCU	(((.((.(((((((((..((((&))))..))))))).)).)))))
C27H6.4b.1	243	263	PAO_13111	3	23	-12.73	UAGUGGAGCUCUCAAGACUGU&ACUUUCCAGAGCGUUCCGCUA	(((((((((.(((..((..((&))..))..))).)))))))))
B0272.3.1	880	889	PAO_13111	4	13	-12.65	CUCUGGAAAG&CUUUCCAGAG	((((((((((&))))))))))
C44B7.10.1	1128	1146	PAO_13111	5	21	-12.63	GUGGAGCAGCAAUUGGAAA&UUUCCAGAGCGUUCCGC	(((((((.((..(((((((&))))))).)))))))))
DC2.5a.1	1027	1042	PAO_13111	3	18	-12.62	GAACUGUCUGGAAGGU&ACUUUCCAGAGCGUUC	((((..((((((((((&))))))))))..))))
F09F7.4a.1	374	381	PAO_13111	2	9	-12.58	GGAGAGUG&CACUUUCC	((((((((&))))))))
ZK455.4.1	1071	1088	PAO_13111	1	19	-12.55	GGAAGCUUUGGAUACUGU&GCACUUUCCAGAGCGUUCC	((((((((((((...(((&)))...)))))))).))))
F59B1.8.1	126	146	PAO_13111	3	22	-12.51	GGCGGAGAGCAAAAUGGAGGU&ACUUUCCAGAGCGUUCCGCU	(((((((.((....(((((((&)))).)))..)).)))))))
C14B1.3.1	549	568	PAO_13111	4	22	-12.49	AGUGGAAUCCACAUGGAAAG&CUUUCCAGAGCGUUCCGCU	((((((((.(...(((((((&)))))))..).))))))))
F43E2.3a.1	70	89	PAO_13111	1	22	-12.43	AGUGGAGCAAAUGAUUGUGC&GCACUUUCCAGAGCGUUCCGCU	((((((((....((..((((&))))..))......))))))))
Y57A10C.6.1	598	619	PAO_13111	2	19	-12.4	GGAAUUCUCUCUGGAUCAGGUG&CACUUUCCAGAGCGUUCC	(((((...(((((((..(((((&)))))))))))).)))))
F32D8.12a.1	520	537	PAO_13111	2	21	-12.39	GUGGUGAAUUUGGAAGUG&CACUUUCCAGAGCGUUCCGC	((((....((((((((((&))).))))))).....))))
K09F6.10.1	495	512	PAO_13111	4	22	-12.36	GGCGGAGCUUCUAGCAAG&CUUUCCAGAGCGUUCCGCU	((((((((((((.(.(((&))).).)))).))))))))
K09A9.1.1	263	288	PAO_13111	1	27	-12.34	AUUUUGGCACGACGCUUCCAAUCUGC&GCACUUUCCAGAGCGUUCCGCUAAAAU	((((((((..(((((((..((..(((&)))..))...)))))))..))))))))
K02E2.4.1	56	75	PAO_13111	5	24	-12.25	UUGGCGUCGCCAACUGGAAA&UUUCCAGAGCGUUCCGCUAA	((((((.(((...(((((((&))))))).)))...))))))
C01B12.3.1	1475	1496	PAO_13111	1	19	-12.16	GGAAGGCUUUGGAGUUCGAUGC&GCACUUUCCAGAGCGUUCC	((((.(((((((((...(.(((&)))).))))))))).))))
F08H9.6.1	939	957	PAO_13111	1	22	-12.15	AGUGUUGCCUGGGGAAUGC&GCACUUUCCAGAGCGUUCCGCU	((((.((((((((((.(((&))).))))))).)))...))))
F18E3.7a.1	608	631	PAO_13111	2	24	-12.15	UUAGAGGAGUCAUUUUGGAAGUUG&CACUUUCCAGAGCGUUCCGCUAA	((((.((((.(.(((((((((.((&)).))))))))).))))).))))
Y49C4A.8a.1	642	656	PAO_13111	2	18	-12.14	GGACCCUGGAAAGCG&CACUUUCCAGAGCGUUC	(((((((((((((.(&).)))))))).).))))
F22A3.6a.1	273	293	PAO_13111	1	22	-12.04	AGCUGCCUGGAAGAGAUGUGC&GCACUUUCCAGAGCGUUCCGCU	(((((((((((((....((((&))))))))))).)))....)))
Y60A3A.7.1	580	599	PAO_13111	6	22	-12.01	GGAGGAAUGAUUCUCUGGAA&UUCCAGAGCGUUCCGCU	((.((((((...((((((((&)))))))))))))).))
C37H5.3a.1	728	747	PAO_13111	9	23	-11.96	UAGCCACAUCCUACGCUCUG&CAGAGCGUUCCGCUA	((((........((((((((&))))))))...))))
C52B9.7b.1	583	593	PAO_13111	1	10	-11.83	UGUGAAAGUGU&GCACUUUCCA	((.((((((((&))))))))))
W08D2.4d.2	1	18	PAO_13111	11	26	-11.82	UUUUAGCGGCCGCCGCUC&GAGCGUUCCGCUAAAA	(((((((((....(((((&)))))..)))))))))
M60.7.1	5	13	PAO_13111	1	10	-11.8	UGGAAAGUC&GCACUUUCCA	(((((((((&).))))))))
Y73F4A.2.1	517	524	PAO_13111	1	8	-11.71	GAAAGUGU&GCACUUUC	((((((((&))))))))
C34E10.6.1	473	488	PAO_13111	4	18	-11.69	GAACGUCAUUGGAGAG&CUUUCCAGAGCGUUC	(((((.(.((((((((&)))))))).))))))
F44A6.5.1	692	707	PAO_13111	1	17	-11.6	AACGCAAAGGAGGUGC&GCACUUUCCAGAGCGUU	(((((...((((((((&))))))))....)))))
Y46H3D.6b.1	22	32	PAO_13111	10	20	-11.53	UGGAGCGCUUU&AGAGCGUUCCG	(((((((((((&)))))))))))
R02E12.6.2	36	55	PAO_13111	5	24	-11.51	UUAGCGGGGGCGACUGUAAA&UUUCCAGAGCGUUCCGCUAA	(((((((((((..(((.(((&))).))).)).)))))))))
F28F8.2.1	774	802	PAO_13111	1	22	-11.45	AGUGGAACCACUGGUCAUCCAAAAGGAGC&GCACUUUCCAGAGCGUUCCGCU	(((((((((.((((.......((((..((&)).)))))))).).))))))))
F58F9.7.1	1871	1893	PAO_13111	1	27	-11.41	AUUUUACAUUCAGCUCUGGGAGC&GCACUUUCCAGAGCGUUCCGCUAAAAU	(((((((.....(((((((((((&))...))))))))).....).))))))
C12C8.1.1	584	597	PAO_13111	8	22	-11.38	GGCGGCAGCUUUGG&CCAGAGCGUUCCGCU	(((((..(((((((&)))))))...)))))
F27D4.1.1	805	812	PAO_13111	4	11	-11.38	CUGGAAAG&CUUUCCAG	((((((((&))))))))
C17G10.8.1	610	623	PAO_13111	10	21	-11.36	GCUGUGAACGCUCU&AGAGCGUUCCGC	((.(.(((((((((&))))))))))))
F41C3.5.1	564	582	PAO_13111	2	19	-11.36	GGAAUGGCACUUGGAAAUG&CACUUUCCAGAGCGUUCC	((((((....(((((((((&)).)))))))..))))))
F02A9.4.1	795	812	PAO_13111	1	18	-11.32	GAAUGUUGGACAAAGUGC&GCACUUUCCAGAGCGUUC	(((((((((..(((((((&))))))))))..))))))
K01C8.10.1	476	484	PAO_13111	9	17	-11.32	GACGCUCUG&CAGAGCGUU	(((((((((&)))))))))
F07F6.8.1	847	859	PAO_13111	4	17	-11.3	GACGUCUGGAAAG&CUUUCCAGAGCGUU	(((((((((((((&))))))))).))))
C25A1.7.1	1001	1008	PAO_13111	1	8	-11.24	GAAAGUGU&GCACUUUC	((((((((&))))))))
Y50E8A.16.1	1897	1905	PAO_13111	1	10	-11.21	UGGAAAGUC&GCACUUUCCA	(((((((((&).))))))))
ZK822.5a.1	1007	1014	PAO_13111	2	9	-11.18	GGAAAGUG&CACUUUCC	((((((((&))))))))
F53C3.6a.1	225	244	PAO_13111	1	27	-11.16	GUUUUAGGGGAGGAAGUAGU&GCACUUUCCAGAGCGUUCCGCUAAAAU	(((((((.(((((((((.((&))))))))........))).)))))))
ZC155.1.1	917	931	PAO_13111	9	23	-11.15	UACCGUGACGCUCUG&CAGAGCGUUCCGCUA	((.((.(((((((((&))))))))).)).))
C05E4.9a.1	2170	2186	PAO_13111	1	21	-11.1	GUGGAACCAUCAAGUGU&GCACUUUCCAGAGCGUUCCGC	(((((((..((((((((&))))))....))..)))))))
ZC97.1a.1	601	610	PAO_13111	1	11	-11.1	CUGGGAAGUC&GCACUUUCCAG	((((((((((&).)))))))))
F38E11.1.1	520	545	PAO_13111	5	22	-11.04	AGCGGAAUCCUUCACAUCUCCGGAAA&UUUCCAGAGCGUUCCGCU	((((((((.........(((.(((((&))))).))).))))))))
ZK1320.4.1	207	231	PAO_13111	7	28	-11.04	GGUUUUAUCAGUUACUACCUCUGGA&UCCAGAGCGUUCCGCUAAAAUC	(((((((...(..((...(((((((&))))))).))..)..)))))))
K02F2.2.1	318	329	PAO_13111	4	16	-11.03	ACGCCUGGAAGG&CUUUCCAGAGCGU	((((((((((((&)))))))).))))
M04F3.4a.1	149	176	PAO_13111	1	20	-10.99	CGGAAUGUUCGACUCGAAUGGAGACGGC&GCACUUUCCAGAGCGUUCCG	((((((((((........((((((..((&))..))))))))))))))))
C46F4.2.1	2483	2503	PAO_13111	7	27	-10.98	AUUUGUGUAUAACGUUCUCGA&UCCAGAGCGUUCCGCUAAAAU	((((..((..((((((((.((&)).))))))))..))..))))
F40F4.4a.1	662	678	PAO_13111	5	22	-10.97	GGUGGGAGCUCGGGAAA&UUUCCAGAGCGUUCCGCU	(((((((((((.(((((&))))).)))).)))))))
K07E3.8.1	351	371	PAO_13111	6	22	-10.97	AGUGGGAUGAUCAUACUGGAA&UUCCAGAGCGUUCCGCU	(((((((((......((((((&))))))..)))))))))
C07D10.2a.1	811	824	PAO_13111	10	22	-10.96	GGUGGAAAUGCUUU&AGAGCGUUCCGCU	((((((.(((((((&)))))))))))))
F54A5.2a.1	665	682	PAO_13111	1	18	-10.9	GGACGAAUCGGAAGGUGU&GCACUUUCCAGAGCGUUC	(((((..(((((((((((&))))))))).)).)))))
F28A12.4.1	742	748	PAO_13111	15	21	-10.77	GCGGAAC&GUUCCGC	(((((((&)))))))
M88.1.1	504	527	PAO_13111	2	22	-10.75	AGUGGAGCACUGAUGGAUUUUGUG&CACUUUCCAGAGCGUUCCGCU	((((((((.((..((((....(((&)))..)))).)).))))))))
R05D8.8.1	187	199	PAO_13111	1	11	-10.72	CUGGAAGAAAUGC&GCACUUUCCAG	(((((((...(((&))).)))))))
C12D8.10a.1	1168	1189	PAO_13111	2	24	-10.68	UUGGUGGGGAGUUGGAGUUGUG&CACUUUCCAGAGCGUUCCGCUAA	(((((((((.(((((((..(((&))).)))))..)).)))))))))
C31E10.7.1	121	130	PAO_13111	1	9	-10.68	GGGAGGUUGC&GCACUUUCC	(((((((.((&)))))))))
F08A8.3.1	1480	1499	PAO_13111	4	23	-10.61	UAGAAGGCAGGCUUGGAAAG&CUUUCCAGAGCGUUCCGCUA	(((..((.(.((((((((((&))))))).))).).)).)))
F08F3.7.1	1647	1654	PAO_13111	1	8	-10.61	GGAGGUGU&GCACUUUC	((((((((&))))))))
C49G7.10a.1	640	649	PAO_13111	1	9	-10.59	GGGAAGUAGC&GCACUUUCC	(((((((.((&)))))))))
C52E4.1.1	630	653	PAO_13111	1	21	-10.51	GCCCCAUGCACAUCUGGAAACUGC&GCACUUUCCAGAGCGUUCCGC	((...((((...((((((((.(((&))).))))))))))))...))
F29G9.3.1	235	254	PAO_13111	1	22	-10.47	AGCUCAUCACUUUGGAAGUC&GCACUUUCCAGAGCGUUCCGCU	(((....(.(((((((((((&).)).)))))))).)....)))
Y54E10A.17b.1	249	264	PAO_13111	6	20	-10.47	UGGAACGACUCAGGGA&UUCCAGAGCGUUCCG	(((((((.(((.((((&)))).))))))))))
F54C1.7.6	573	581	PAO_13111	3	11	-10.46	CUGGAGAGU&ACUUUCCAG	(((((((((&)))))))))
R07E3.1b.1	128	134	PAO_13111	16	22	-10.46	AGCGGAA&UUCCGCU	(((((((&)))))))
W10D9.5b.1	115	136	PAO_13111	2	28	-10.38	GAUUUGGGGUGUUAAGGGAGUG&CACUUUCCAGAGCGUUCCGCUAAAAUC	(((((((((((((..(((((((&)))))))...))))))))....)))))
W01A8.1a.1	331	348	PAO_13111	6	24	-10.31	UUGGUGGUACAUUCGGAA&UUCCAGAGCGUUCCGCUAA	(((((((.((.(((((((&)))).))).)).)))))))
C15C8.3a.1	1284	1303	PAO_13111	1	22	-10.3	AGCGGAAGACUUGGCCUUGC&GCACUUUCCAGAGCGUUCCGCU	((((((((..((((...(((&)))....))))..).)))))))
D1005.3.1	299	328	PAO_13111	1	28	-10.29	GAUUUUGAUGAUGCCGAGCUCCAAAAGUGC&GCACUUUCCAGAGCGUUCCGCUAAAAUC	(((((((.....((.((((((..(((((((&)))))))...))))..)).)))))))))
C54G6.5.1	149	166	PAO_13111	4	22	-10.25	GGUGGAAACGUGGCGAAG&CUUUCCAGAGCGUUCCGCU	(((((((.(((((.((((&))))))...))))))))))
C23H5.8a.1	304	312	PAO_13111	2	10	-10.22	UGGGAAGUG&CACUUUCCA	(((((((((&)))))))))
ZK896.5.1	247	259	PAO_13111	11	22	-10.22	AGCGUGAAUGCUU&GAGCGUUCCGCU	((((.((((((((&))))))))))))
C54D10.1.1	169	176	PAO_13111	1	8	-10.18	GAAAGUGU&GCACUUUC	((((((((&))))))))
K10D2.6.1	469	479	PAO_13111	1	11	-10.18	CUGGAGACUGU&GCACUUUCCAG	(((((((.(((&))).)))))))
K06A5.6.1	689	695	PAO_13111	4	10	-10.09	UGGAAAG&CUUUCCA	(((((((&)))))))
K11G9.1.1	1550	1570	PAO_13111	1	22	-10.07	AGCGGAAUGGAGGAUGAGUUC&GCACUUUCCAGAGCGUUCCGCU	(((((((((..(((.((((.(&).)))))))....)))))))))
C15H11.3.1	945	951	PAO_13111	1	7	-10.02	GAAGUGC&GCACUUU	(((((((&)))))))
F31D4.9.1	275	281	PAO_13111	15	21	-10	GCGGAAC&GUUCCGC	(((((((&)))))))
C01A2.4.1	348	361	PAO_13111	11	22	-9.88	AGCAAUGAAUGCUC&GAGCGUUCCGCU	(((...((((((((&)))))))).)))
F44E7.8a.1	992	1006	PAO_13111	5	19	-9.87	GGAAAUUUUUGGAAA&UUUCCAGAGCGUUCC	((((..(((((((((&)))))))))..))))
F44G3.2.1	886	901	PAO_13111	9	22	-9.86	GGUGGCUGACGUUCUG&CAGAGCGUUCCGCU	(((((..(((((((((&))))))))))))))
C49A9.8.1	723	730	PAO_13111	4	11	-9.76	CUGGAGAG&CUUUCCAG	((((((((&))))))))
F49E12.9a.1	829	844	PAO_13111	7	21	-9.76	GUGAUUACUCUCUGGA&UCCAGAGCGUUCCGC	(((...((.(((((((&))))))).))..)))
R151.9.1	133	148	PAO_13111	3	21	-9.64	GCGGAACGAAAAAAGU&ACUUUCCAGAGCGUUCCGC	((((((((...(((((&)))))......))))))))
Y37E3.9.1	21	41	PAO_13111	5	22	-9.64	AGCUUUUGGGUCGCUUGGGAA&UUUCCAGAGCGUUCCGCU	(((....(((.((((((((((&))))))).))).))))))
ZK632.3.1	791	810	PAO_13111	5	19	-9.6	GGAAUUAUCGCAACUGGAAA&UUUCCAGAGCGUUCC	((((....(((..(((((((&))))))).)))))))
C01B10.11.1	808	825	PAO_13111	2	22	-9.52	AGGGAAUUUGGGAAUGUG&CACUUUCCAGAGCGUUCCGCU	((((((((((((((.(((&)))))))))))...)))).))
C52G5.2.1	243	250	PAO_13111	4	11	-9.42	UUGGAGAG&CUUUCCAG	((((((((&))))))))
F28A10.6.1	976	982	PAO_13111	15	21	-9.34	GCGGAGC&GUUCCGC	(((((((&)))))))
C27A2.2a.1	162	168	PAO_13111	4	10	-9.29	UGGAAAG&CUUUCCA	(((((((&)))))))
M117.2a.1	107	113	PAO_13111	2	8	-9.16	GAAAGUG&CACUUUC	(((((((&)))))))
C06H2.1.1	356	371	PAO_13111	2	19	-9.14	GGAGGCCAAGAAGGUG&CACUUUCCAGAGCGUUCC	(((((((..(((((((&)))))))..).)).))))
F59A2.3.1	834	849	PAO_13111	9	24	-9.09	UUAGUUUUUUGUUCUG&CAGAGCGUUCCGCUAA	(((((....(((((((&)))))))....)))))
C28C12.7b.1	1164	1171	PAO_13111	7	14	-9.04	GCUCUGGA&UCCAGAGC	((((((((&))))))))
R12E2.11.1	516	531	PAO_13111	4	23	-9.01	UAGCUGUUUUGGAUAG&CUUUCCAGAGCGUUCCGCUA	(((((((((((((.((&)).)))))))))....))))
F44C8.1.1	591	619	PAO_13111	7	28	-8.93	GAUUUUAAGAAGCUAAGAGAGCUCAUGGA&UCCAGAGCGUUCCGCUAAAAUC	(((((((....((...(((.((((.((((&)))))))).))).)))))))))
C06G3.1a.1	894	905	PAO_13111	10	22	-8.92	AGUGAACGCUUU&AGAGCGUUCCGCU	((((((((((((&))))))))).)))
F26D10.9a.1	164	178	PAO_13111	5	18	-8.64	GAUCCGUUCUGGAAG&UUUCCAGAGCGUUC	((..(((((((((((&))))))))))).))
M02F4.8.1	66	79	PAO_13111	10	21	-8.58	GCGAAAUGCGCUCU&AGAGCGUUCCGC	(((....(((((((&)))))))..)))
ZK652.2.1	208	218	PAO_13111	9	19	-8.56	GGAUCGUUCUG&CAGAGCGUUCC	(((.(((((((&))))))).)))
Y57G11C.34.1	536	542	PAO_13111	4	10	-8.39	UGGAGAG&CUUUCCA	(((((((&)))))))
K07A12.3.1	227	234	PAO_13111	1	9	-8.34	GGAAAGUC&GCACUUUCC	((((((((&).)))))))
C33A12.3a.1	527	545	PAO_13111	1	20	-8.33	CGGAACGCGUUUACGCCGC&GCACUUUCCAGAGCGUUCCG	((((((((.........((&))..........))))))))
W02D3.7.1	211	221	PAO_13111	2	13	-8.33	CUCUGGGAGUG&CACUUUCCAGAG	(((((((((((&))).))))))))
F13C5.1.1	388	398	PAO_13111	14	23	-8.29	UAGUCGGAGCG&CGUUCCGCUA	(((.(((((((&))))))))))
Y38F1A.6.1	897	909	PAO_13111	4	16	-8.28	ACGCGUUGGAAAG&CUUUCCAGAGCGU	((((.((((((((&)))))))).))))
CD4.7a.1	2	8	PAO_13111	6	12	-8.2	UCUGGAA&UUCCAGA	(((((((&)))))))
C45B11.3.1	599	610	PAO_13111	10	22	-8.15	AGUGAACGCUUU&AGAGCGUUCCGCU	((((((((((((&)))))))).))))
R107.5a.1	47	68	PAO_13120	2	22	-24.78	UUCGAAUCUUCACCAGCCCUAC&GUGGGUCUGGGCAGAUUCGAA	(((((((((.(.((((.(((((&))))).))))).)))))))))
F26D10.9a.1	1211	1232	PAO_13120	1	22	-24.33	UUCGAAUCAGCCACCGCCCAUC&GGUGGGUCUGGGCAGAUUCGAA	((((((((.(((...(((((((&)))))))...))).))))))))
F09F7.8.1	129	145	PAO_13120	1	17	-24.24	AUCUGCCUACGCCUACC&GGUGGGUCUGGGCAGAU	(((((((((.(((((((&))))))).)))))))))
K02E11.10.1	162	179	PAO_13120	1	17	-22.03	AUCUGCCCCAGCCCCACU&GGUGGGUCUGGGCAGAU	((((((((.((.((((((&)))))).))))))))))
F44C8.1.1	1226	1242	PAO_13120	1	18	-21.8	AAUCUUCCCAGACCCCU&GGUGGGUCUGGGCAGAUU	(((((.(((((((((((&)).))))))))).)))))
C01B12.3.1	512	535	PAO_13120	2	22	-21.25	UUCGAGUCUAUCCCUAGUCCACAC&GUGGGUCUGGGCAGAUUCGAA	(((((((((...(((((.((.(((&))))).))))).)))))))))
C27A7.5b.1	333	357	PAO_13120	1	22	-20.97	UUCGUAAUUUGUCCUCUUCCCUUCC&GGUGGGUCUGGGCAGAUUCGAA	((((.(((((((((....(((..((&)).)))...)))))))))))))
K01C8.10.1	348	369	PAO_13120	1	21	-20.61	UUGAUGCUGCUCAGAACCUGCU&GGUGGGUCUGGGCAGAUUCGA	((((..((((((((.(((((((&)))))))))))))))..))))
C47A10.1.1	1982	2002	PAO_13120	1	20	-20.01	CGAGAAGCCCGGAGCCCCACC&GGUGGGUCUGGGCAGAUUCG	((((..(((((((..((((((&)))))))))))))...))))
F28F8.2.1	880	906	PAO_13120	1	19	-19.26	GAAUCUGUAUCCCAAACCCUCUUUACC&GGUGGGUCUGGGCAGAUUC	(((((((...((((.((((.....(((&))))))).)))))))))))
C52E4.1.1	310	329	PAO_13120	1	21	-19.15	UCGCCUCUGUCCCAGCCACC&GGUGGGUCUGGGCAGAUUCGA	(((..(((((((.(.(((((&))))).)..)))))))..)))
C06G3.1a.1	91	119	PAO_13120	1	19	-18.8	GACUCUGCCCUUUGCAAGUACCGCCCACC&GGUGGGUCUGGGCAGAUUC	((.(((((((......((....(((((((&)))))))))))))))).))
C05E4.9a.1	1878	1893	PAO_13120	1	17	-18.63	AUCUCCUACACCCACC&GGUGGGUCUGGGCAGAU	((((((((.(((((((&))))))).)))).))))
E03H4.7.1	911	930	PAO_13120	1	17	-18.42	AUCUGCUCCACUGGCCUAUC&GGUGGGUCUGGGCAGAU	((((((.(((..((((((((&)))))))))))))))))
K09F6.10.3	136	155	PAO_13120	1	19	-18.23	GAAUCUGUCAAAACCAAACC&GGUGGGUCUGGGCAGAUUC	(((((((((...(((..(((&))).)))...)))))))))
D1005.3.1	482	503	PAO_13120	1	22	-18.21	UUCGGAGCUACCAAGACCCGCC&GGUGGGUCUGGGCAGAUUCGAA	((((((.((.((.(((((((((&))))))))).)).)).))))))
F15E6.7a.1	676	698	PAO_13120	1	19	-18.14	GAAUCUUCAAAUCUCAACCCACC&GGUGGGUCUGGGCAGAUUC	((((((......(((((((((((&))))))).)))).))))))
C01B10.11.1	25	44	PAO_13120	1	21	-18.06	UUGAAAUUGCCCAGCUCAAC&GGUGGGUCUGGGCAGAUUCGA	(((((.((((((((((((.(&).)))).)))))))).)))))
C37H5.3a.1	174	185	PAO_13120	3	14	-17.86	UGCCCAGACUCA&UGGGUCUGGGCA	((((((((((((&))))))))))))
F43E2.3a.1	1646	1669	PAO_13120	1	21	-17.66	UUGAAUUUUUAUCCCUUACCCAUC&GGUGGGUCUGGGCAGAUUCGA	((((((((....(((..(((((((&)))))))..))).))))))))
K02E2.4.1	250	264	PAO_13120	1	15	-17.42	CUGCCCAGAGCCAGU&GGUGGGUCUGGGCAG	(((((((((.(((.(&).))).)))))))))
C35B1.2b.1	1100	1117	PAO_13120	1	16	-17.36	UUUGCCACUAUGCCCGCC&GGUGGGUCUGGGCAGA	((((((.(...(((((((&)))))))..)))))))
C25A1.7.1	2421	2436	PAO_13120	1	17	-17.32	AUCUGCUCAAUUCACU&GGUGGGUCUGGGCAGAU	((((((((((((((((&))))))).)))))))))
K08E7.9.1	3014	3031	PAO_13120	1	18	-17.26	GAUCAUCACCGACCCACC&GGUGGGUCUGGGCAGAUU	((((..(.((((((((((&)))))))).)))..))))
C07D10.2a.1	1398	1418	PAO_13120	2	22	-17.25	UUCAUUUUCUGCCCAUCUCAU&GUGGGUCUGGGCAGAUUCGAA	(((....((((((((.(((((&)))))..))))))))...)))
C55B7.3.1	849	876	PAO_13120	2	20	-17.16	CGAAAAGAUUCAUCUGCACCCAGGCCCC&GUGGGUCUGGGCAGAUUCG	(((........((((((..(((((((((&).)))))))))))))))))
F09E5.3.1	977	998	PAO_13120	2	22	-17.13	UUCGAAUUGCCAUAGCAUCCAU&GUGGGUCUGGGCAGAUUCGAA	(((((((((((.(((.((((((&))))))))))))).)))))))
C49G7.3.1	586	608	PAO_13120	1	21	-17.12	UCAAUACUGCCAAAAGACUUGCC&GGUGGGUCUGGGCAGAUUCGA	(((((.(((((...(((((((((&))))))))).)))))))).))
F08A8.3.1	1012	1022	PAO_13120	1	11	-17.1	CCAGACCCAGC&GGUGGGUCUGG	(((((((((.(&).)))))))))
M60.7.1	1359	1369	PAO_13120	2	13	-17.04	GCCCAGAUCCC&GUGGGUCUGGGC	(((((((((((&).))))))))))
F41C3.5.1	167	187	PAO_13120	1	20	-17.02	CGAGCCAUCCAACGACCCACU&GGUGGGUCUGGGCAGAUUCG	(((((..((((..((((((((&))))))))))))..).))))
K10D2.6.2	2229	2243	PAO_13120	1	13	-16.9	GCCCACUAACCCACU&GGUGGGUCUGGGC	(((((...(((((((&))))))).)))))
W07B8.5.1	689	703	PAO_13120	1	14	-16.9	UGCCCAGAAGACACC&GGUGGGUCUGGGCA	((((((((...((((&))))..))))))))
R08F11.3.1	966	988	PAO_13120	2	22	-16.82	UUCGAAUAAUUGCCUAGAUUUAU&GUGGGUCUGGGCAGAUUCGAA	(((((((..((((((((((((((&)))))))))))))))))))))
F41B5.4.1	1072	1093	PAO_13120	2	21	-16.7	UCGAAUACCUGCCUGGAUUUAU&GUGGGUCUGGGCAGAUUCGA	((((((..((((((((((((((&))))))))))))))))))))
ZK896.5.1	346	359	PAO_13120	1	15	-16.63	CUGCUAGAUCCAUC&GGUGGGUCUGGGCAG	((((((((((((((&))))))))).)))))
R11A5.4a.1	1875	1895	PAO_13120	1	19	-16.55	GAAAGAUGCCAAAGAUCUACC&GGUGGGUCUGGGCAGAUUC	(((...((((..(((((((((&))))))))).))))..)))
Y73C8B.1.1	169	185	PAO_13120	1	16	-16.38	UCUGCAUCAGGCUCACC&GGUGGGUCUGGGCAGA	(((((.(((((((((((&))))))))))))))))
C05A9.1a.1	3028	3048	PAO_13120	1	18	-16.3	AAUUAUGCCCUACGAUUCAUC&GGUGGGUCUGGGCAGAUU	((((.(((((...((((((((&)))))))).)))))))))
Y38F1A.6.1	1143	1159	PAO_13120	1	16	-16.28	UUUGCCACGGACUCUCC&GGUGGGUCUGGGCAGA	((((((.(((((((.((&)).)))))))))))))
F44C4.3.1	752	766	PAO_13120	3	18	-16.17	GGUCUCCCAGAUCCA&UGGGUCUGGGCAGAUU	(((((((((((((((&)))))))))).)))))
Y46G5A.18a.2	111	135	PAO_13120	1	21	-16.16	UCGAAUGUUCAGCCAGAAACUCACC&GGUGGGUCUGGGCAGAUUCGA	((((((.(....((((..(((((((&)))))))))))..).))))))
W03G1.5.1	1429	1447	PAO_13120	1	16	-16.12	UCUGGCCACCAUGCCCACC&GGUGGGUCUGGGCAGA	((((.(((....(((((((&))))))).))).))))
Y73F4A.2.1	30	52	PAO_13120	1	22	-16.08	UUCGAAAAAUGUUCCGAUCCAUU&GGUGGGUCUGGGCAGAUUCGAA	((((((...(((((.((((((((&)))))))).)))))..))))))
C55A6.5.1	497	526	PAO_13120	1	21	-15.99	UCUGGAUCUGCACAAUUCCCAGUUCUCGCC&GGUGGGUCUGGGCAGAUUCGA	((.((((((((.......((((..((((((&)))))).))))))))))))))
F14F9.4.1	2203	2222	PAO_13120	2	22	-15.99	UUCUAAUCUGCCCCAACUGC&GUGGGUCUGGGCAGAUUCGAA	(((.(((((((((...((((&))))....))))))))).)))
C06H2.1.1	234	252	PAO_13120	2	19	-15.97	GAAUCUGUAAAGAUCCCAU&GUGGGUCUGGGCAGAUUC	((((((((..(((.(((((&))))))))..))))))))
C12C8.1.1	1431	1453	PAO_13120	1	22	-15.9	UUUGAAUUAACUGGAAUCCCACC&GGUGGGUCUGGGCAGAUUCGAA	((((((((..(((((..((((((&)))))))))))...))))))))
R03D7.1.1	2453	2472	PAO_13120	1	21	-15.74	UCGGACUCUCUGGACUCAUU&GGUGGGUCUGGGCAGAUUCGA	(((((((.((((((((((((&)))))))))))).)).)))))
K09A9.1.1	278	308	PAO_13120	2	22	-15.65	UUCCAAUCUGCUAUUCUUCAAUCGGACCUGC&GUGGGUCUGGGCAGAUUCGAA	(((.((((((((..........(((((((((&))))))))))))))))).)))
W08D2.4b.1	145	162	PAO_13120	2	19	-15.64	GGAUCUUCUCAGGCUUAU&GUGGGUCUGGGCAGAUUC	((((((.(((((((((((&))))))))))).))))))
M117.2a.1	500	516	PAO_13120	1	19	-15.59	GAUGCAGCCAACCCACC&GGUGGGUCUGGGCAGAUUC	((..(.(((.(((((((&)))))))...))).)..))
R12E2.11.2	180	196	PAO_13120	1	13	-15.58	GUCCAGGCCGCUUCACC&GGUGGGUCUGGGC	(((((((((....((((&)))))))))))))
Y82E9BR.18.1	829	850	PAO_13120	1	21	-15.53	UCGACUCCAAUCCAAAUCUACC&GGUGGGUCUGGGCAGAUUCGA	((((.((...((((.(((((((&))))))).))))..)).))))
Y60A3A.7.1	735	760	PAO_13120	2	19	-15.49	GAAUCUGACCAGUCUUGUGAGCCCAU&GUGGGUCUGGGCAGAUUC	(((((((.((((........((((((&)))))))))).)))))))
F58B3.1.1	323	343	PAO_13120	1	21	-15.46	UCUAACUGCCCAUCUGCUGCC&GGUGGGUCUGGGCAGAUUCGA	((.(((((((((....(((((&)))))...))))))).)).))
W09H1.5.1	806	822	PAO_13120	2	20	-15.46	CGAGUCUCCUGGACCAC&GUGGGUCUGGGCAGAUUCG	(((((((((((((((((&)).)))))))).)))))))
W01A8.1b.1	1271	1293	PAO_13120	1	22	-15.45	UUUGUUUUUGUCAGACCUUUGCC&GGUGGGUCUGGGCAGAUUCGAA	((((..((((((((((((..(((&)))))))))).)))))..))))
D2096.8.1	481	507	PAO_13120	2	21	-15.41	UCGAGUUCCACUUUGCCACCAACCCAU&GUGGGUCUGGGCAGAUUCGA	(((((((......((((.(..((((((&))))))..))))))))))))
F57B9.6a.1	1343	1367	PAO_13120	1	17	-15.35	AUCUGUUUUCUCCUCCACCCCCACC&GGUGGGUCUGGGCAGAU	(((((((........((..((((((&))))))..)))))))))
ZK617.2.1	81	100	PAO_13120	2	20	-15.3	CGGACAUGCAGUAGACCCAC&GUGGGUCUGGGCAGAUUCG	((((..(((..(((((((((&))))))))).)))..))))
F29G9.3.1	406	428	PAO_13120	1	20	-15.2	CGAUUGCUGCCCAAGAUCUCAUU&GGUGGGUCUGGGCAGAUUCG	(((.(.(((((((.((((.((((&)))))))))))))))).)))
F58F9.7.1	1788	1810	PAO_13120	1	22	-15.17	UUCGAGAGAAGCUUAGACUCGCU&GGUGGGUCUGGGCAGAUUCGAA	((((((....(((((((((((((&)))))))))))))...))))))
Y53G8B.2.1	514	536	PAO_13120	1	21	-15.17	UCGACUGCUCCAGAGAAUCCAUU&GGUGGGUCUGGGCAGAUUCGA	((((((((.((((...(((((((&)))))))))))))))..))))
F27D4.1.1	559	578	PAO_13120	1	21	-15.15	UUGAAAAUGCCCCAUCCGCU&GGUGGGUCUGGGCAGAUUCGA	(((((..(((((.(((((((&)))))))..)))))..)))))
C54G7.2.1	1246	1265	PAO_13120	1	21	-15.14	UCGCUCUUGCCUACGCCACC&GGUGGGUCUGGGCAGAUUCGA	(((...(((((((..(((((&)))))...)))))))...)))
C49A9.8.1	301	320	PAO_13120	1	22	-15.09	UUCGACUCUACACACCCAUC&GGUGGGUCUGGGCAGAUUCGAA	(((((.(((.((.(((((((&))))))).))...))).)))))
E02H1.3.1	128	144	PAO_13120	3	19	-15.06	GAGUAUGCCCAGAUGCA&UGGGUCUGGGCAGAUUC	((((.(((((((((.((&)).))))))))).))))
C15C8.3a.1	1229	1246	PAO_13120	1	21	-15.05	UUGGAUGCUCGGACCACC&GGUGGGUCUGGGCAGAUUCGA	((((((((((((((((((&))))).))))))))..)))))
F57C12.4.1	2212	2229	PAO_13120	1	19	-15.05	GGAUCUGGCUAAUCUACC&GGUGGGUCUGGGCAGAUUC	(((((((.((((((((((&))))))).))).)))))))
R151.9.1	463	481	PAO_13120	1	17	-14.95	GUCUGCCGAGAAAUCUACU&GGUGGGUCUGGGCAGAU	(((((((.(((..((((((&))))))))).)))))))
K02F2.2.1	610	631	PAO_13120	1	20	-14.93	CGAGUCUCUCCCAGACGGAAUC&GGUGGGUCUGGGCAGAUUCG	(((((((..(((((((...(((&)))..))))))).)))))))
C31C9.1a.1	490	513	PAO_13120	1	20	-14.83	CGACGUCUCCAAGACAUGCCCACC&GGUGGGUCUGGGCAGAUUCG	(((.((((((.((....(((((((&))))))))).)).)))))))
Y51A2D.9a.1	105	120	PAO_13120	1	16	-14.83	UCUGCUCAUUUCCACU&GGUGGGUCUGGGCAGA	((((((((..((((((&))))))..))))))))
B0272.3.1	628	640	PAO_13120	1	13	-14.79	GCCCGGAUUCAUU&GGUGGGUCUGGGC	(((((((((((((&)))))))))))))
C44B7.10.1	750	768	PAO_13120	4	21	-14.74	UCGGAGCUGUCCCAGAUGC&GGGUCUGGGCAGAUUCGA	(((((.(((.(((((((.(&).)))))))))).)))))
C17C3.1c.2	54	74	PAO_13120	1	22	-14.72	UUCAAUCUGUUCAGUAUUAUU&GGUGGGUCUGGGCAGAUUCGAA	((((((((((((((..(((((&)))))..))))))))))).)))
C23H5.8b.2	448	471	PAO_13120	1	21	-14.63	UCGAAUCUGCGCUUAAAUCAAAUC&GGUGGGUCUGGGCAGAUUCGA	((((((((((.(....(((..(((&))).)))..).))))))))))
C37A5.1.1	1190	1207	PAO_13120	1	17	-14.61	AUCCGCCGCAGACUUUCC&GGUGGGUCUGGGCAGAU	(((.(((.(((((((.((&)).)))))))))).)))
C15B12.8.1	963	976	PAO_13120	1	15	-14.58	CUCCCCGGACCACC&GGUGGGUCUGGGCAG	((.(((((((((((&)))).))))))).))
C15H11.3.1	71	90	PAO_13120	1	21	-14.58	UCGACUUGACCCAGACACUC&GGUGGGUCUGGGCAGAUUCGA	((((.((..(((((((.(((&)).).)))))))..)).))))
F59A2.3.1	558	573	PAO_13120	1	17	-14.58	AUCGAUCCAGACCUCC&GGUGGGUCUGGGCAGAU	(((..(((((((((((&)).)))))))))..)))
F28C10.3.1	466	484	PAO_13120	1	19	-14.49	GAAUCUGCUCAUUUUUACU&GGUGGGUCUGGGCAGAUUC	(((((((((((..((((((&))))))..)))))))))))
F57B10.3a.1	1806	1823	PAO_13120	1	16	-14.36	UCUUCCCAAUUACCUACU&GGUGGGUCUGGGCAGA	(((.((((...(((((((&))))))).)))).)))
F49E8.5.1	526	541	PAO_13120	1	16	-14.34	UCUGCUCAGAGACAUC&GGUGGGUCUGGGCAGA	((((((((((..((((&))))..))))))))))
C14B1.3.1	1024	1048	PAO_13120	1	21	-14.3	UCGAAGUUAUUCUGCCUGAUGAGCC&GGUGGGUCUGGGCAGAUUCGA	(((((.....((((((((((..(((&)))..))).))))))))))))
C36A4.9a.1	1556	1574	PAO_13120	1	20	-14.26	CGCUUUGUCAAGACCUAUU&GGUGGGUCUGGGCAGAUUCG	((.((((((.(((((((((&))))))))).))))))..))
F54D5.12.1	566	581	PAO_13120	2	17	-14.23	AUCUUCUCGGGCUCAC&GUGGGUCUGGGCAGAU	((((.(((((((((((&))))))))))).))))
F09B12.3.1	318	340	PAO_13120	1	15	-14.22	CUGCCCACAACUUCAAGCCUACU&GGUGGGUCUGGGCAG	(((((((.........(((((((&))))))).)))))))
C34E10.6.1	1397	1420	PAO_13120	3	20	-14.16	CGUUUCACGUGCCCGCAAGAUCCA&UGGGUCUGGGCAGAUUCG	((..((...(((((...(((((((&))))))))))))))..))
DC2.5a.1	876	896	PAO_13120	2	22	-14.16	UUCGGUUCAUCCGGGAUCCGC&GUGGGUCUGGGCAGAUUCGAA	(((((.((..((.((((((((&)))))))).))..)).)))))
C52B9.7a.1	233	253	PAO_13120	1	20	-14.06	CGACAUCUCUUCAUAUCCAUU&GGUGGGUCUGGGCAGAUUCG	(((.((((.((((.(((((((&))))))).)))).)))))))
C27H6.4c.6	71	81	PAO_13120	1	12	-14.01	UCCAGACCACC&GGUGGGUCUGGG	(((((((((((&))).))))))))
C28C12.7a.1	598	611	PAO_13120	2	16	-13.98	UCUCCAAGAUCCAC&GUGGGUCUGGGCAGA	(((((.((((((((&)))))))).)).)))
C29F7.2a.1	690	705	PAO_13120	3	17	-13.97	AUUUGCUACAGAUCCA&UGGGUCUGGGCAGAU	(((((((.((((((((&)))))))))))))))
C46F4.2.3	5	25	PAO_13120	1	22	-13.95	UUUGUAUCUCUCAUACCUAUU&GGUGGGUCUGGGCAGAUUCGAA	((((.((((((((.(((((((&))))))).)))).)))).))))
C05C10.4.1	614	636	PAO_13120	1	20	-13.93	UGACAUCUGGCCUAGACUCCUUC&GGUGGGUCUGGGCAGAUUCG	(((.(((((.(((((((.((.((&)).)))))))))))))))))
F21F8.11.1	798	818	PAO_13120	1	22	-13.87	UUUGACUGUUCGUAACUCGCC&GGUGGGUCUGGGCAGAUUCGAA	((((((((((((..(((((((&))))))).)))))))..)))))
M02F4.8.1	440	455	PAO_13120	1	16	-13.83	UCUGCUCUUAUCCAGC&GGUGGGUCUGGGCAGA	(((((((..(((((.(&).)))))..)))))))
B0361.8.1	814	838	PAO_13120	1	21	-13.82	UCGAAUCAGUUGCCGAGAGCUUAUU&GGUGGGUCUGGGCAGAUUCGA	(((((((...((((.(((.((((((&))))))))).)))))))))))
ZK455.1.1	344	360	PAO_13120	1	18	-13.81	AGUAUGCCCAGUUGACC&GGUGGGUCUGGGCAGAUU	(((.(((((((((.(((&))).)).))))))).)))
C16A3.7.1	363	385	PAO_13120	2	22	-13.8	UUCGAAUCAAAAUUCCAGACAAC&GUGGGUCUGGGCAGAUUCGAA	((((((((.....(((((((.((&))..)))))))..))))))))
Y58A7A.5.1	901	920	PAO_13120	1	16	-13.7	UCUGUCAAAACAAGCCCAUC&GGUGGGUCUGGGCAGA	((((((....((.(((((((&))))))).))))))))
Y50E8A.16.1	1147	1167	PAO_13120	1	20	-13.69	CGAAUCAAUCUCGAACUCACU&GGUGGGUCUGGGCAGAUUCG	((((((...((((.(((((((&))))))).))))..))))))
Y37E3.9.1	310	332	PAO_13120	1	20	-13.68	CGAUCGUCUUCCAAACAUCUACC&GGUGGGUCUGGGCAGAUUCG	(((..((((((((...(((((((&))))))).)))).)))))))
F44G3.2.1	895	912	PAO_13120	1	20	-13.64	CGUUCUGCCCAACUAACC&GGUGGGUCUGGGCAGAUUCG	((.(((((((((((.(((&))).))).))))))))..))
C12D8.10a.1	1868	1887	PAO_13120	1	22	-13.63	UUCCUGUUCUGCCUCCUUCC&GGUGGGUCUGGGCAGAUUCGAA	(((....((((((((((.((&)).)))...)))))))...)))
F02A9.4.1	632	656	PAO_13120	1	21	-13.6	UUGAUUUUGCUGACAUAUACCCACU&GGUGGGUCUGGGCAGAUUCGA	((((.((((((..((...(((((((&))))))).)))))))).))))
F54D8.3a.1	392	409	PAO_13120	1	18	-13.6	GAUCUGCCACUUUCUAUC&GGUGGGUCUGGGCAGAUU	((((((((....((((((&))))))....))))))))
F32D8.12c.1	132	158	PAO_13120	1	19	-13.53	GAAUCUGUAAGAAGGCAAUGCACCACC&GGUGGGUCUGGGCAGAUUC	((((((((....((((......(((((&)))))))))..))))))))
B0399.2.1	56	79	PAO_13120	1	21	-13.52	UCGACCAAUAUCUUACCGCCCAUC&GGUGGGUCUGGGCAGAUUCGA	((((.....((((..(((((((((&)))))))..))..))))))))
F55F8.5.1	253	272	PAO_13120	1	20	-13.49	CGAGUCUAGCUGAAUUCAUC&GGUGGGUCUGGGCAGAUUCG	(((((((.(((.((((((((&))))))).).))))))))))
M05D6.6.1	305	325	PAO_13120	1	17	-13.47	GUCUGCCGCUGAUAUUCCACC&GGUGGGUCUGGGCAGAU	(((((((.(.(((...(((((&)))))))).))))))))
F22E10.3.1	406	438	PAO_13120	1	21	-13.45	UCGCGUCACUAAUGCCCUUCUUGUCUAUCCACC&GGUGGGUCUGGGCAGAUUCGA	(((.(((.....(((((.........(((((((&)))))))..)))))))).)))
F11C1.5a.1	1708	1723	PAO_13120	1	15	-13.43	CUGUCCCAAAUCUAUC&GGUGGGUCUGGGCAG	(((.((((.(((((((&))))))).)))))))
K11C4.4.1	1054	1074	PAO_13120	1	19	-13.43	GAGUUCUUUCCAGACACCAAC&GGUGGGUCUGGGCAGAUUC	((((.((.(((((((.(((.(&).)))))))))).))))))
Y71F9B.4.1	228	245	PAO_13120	1	19	-13.42	GAAUCUCCUAGAUUUUUC&GGUGGGUCUGGGCAGAUUC	(((((((((((((((.((&)).))))))))).))))))
F14H8.6b.1	427	438	PAO_13120	1	12	-13.27	CUCGGACCCUCC&GGUGGGUCUGGG	(((((((((.((&)).)))))))))
F56C11.6a.1	646	663	PAO_13120	1	19	-13.26	GGAUCUGCUUUGCCUAUC&GGUGGGUCUGGGCAGAUUC	((((((((((.(((((((&)))))))..))))))))))
K08D9.4a.1	722	739	PAO_13120	5	19	-13.18	GAACUGCCCACAAAGACU&GGUCUGGGCAGAUUC	((((((((((....((((&))))))))))).)))
ZC376.7a.1	944	972	PAO_13120	1	21	-13.1	UCGAAUCUUUUGAGACUGUCAACUCCAUC&GGUGGGUCUGGGCAGAUUCGA	((((((((.((.((((........(((((&))))))))).)).))))))))
F44A6.5.1	33	52	PAO_13120	1	19	-13.09	GAACAUGCUCAGCGCUCAGC&GGUGGGUCUGGGCAGAUUC	(((..(((((((.(((((.(&).))))))))))))..)))
C08F8.2b.1	1769	1791	PAO_13120	1	21	-13.08	UUGAAUGGCCGCCUAAACCUGCU&GGUGGGUCUGGGCAGAUUCGA	((((((....(((((.(((((((&))))))).)))))..))))))
Y53F4B.33.1	196	216	PAO_13120	1	18	-12.92	AAUCUGCUGCAAUCAUCCGCU&GGUGGGUCUGGGCAGAUU	((((((((.((...(((((((&))))))).))))))))))
C47E12.4c.1	365	383	PAO_13120	4	19	-12.87	GAGUCUGCACACGAGGCCC&GGGUCUGGGCAGAUUC	((((((((...(.((((((&)))))).)))))))))
F22A3.6c.1	36	56	PAO_13120	1	21	-12.76	UCGCUUCUGCUCCUUUCUGUC&GGUGGGUCUGGGCAGAUUCGA	(((..(((((((...((((((&))))))...)))))))..)))
Y48G8AL.5b.1	1399	1414	PAO_13120	4	19	-12.75	GAAUCUGCUGAAACUC&GGGUCUGGGCAGAUUC	(((((((((.(.((((&)))).).)))))))))
Y54E10A.17a.2	9	32	PAO_13120	1	15	-12.74	CUGCCAACCAGUCCAAAACCCAUC&GGUGGGUCUGGGCAG	(((((...(((......(((((((&)))))))))))))))
F37B4.2.1	485	504	PAO_13120	1	19	-12.69	GGAUGUGCUCAGAAUUCGUC&GGUGGGUCUGGGCAGAUUC	((((.((((((((.((((((&)))))))))))))).))))
F49D11.8.1	528	551	PAO_13120	1	22	-12.69	UUCACUUUCUGUUCCCAAUUCACU&GGUGGGUCUGGGCAGAUUCGAA	(((....((((..(((((((((((&))))))).))))))))...)))
K07E3.8.1	211	224	PAO_13120	3	16	-12.67	UCUGUUUGGACUCA&UGGGUCUGGGCAGA	((((((((((((((&))))))))))))))
C33A12.3b.1	208	220	PAO_13120	1	11	-12.63	CCAGACUUCCACC&GGUGGGUCUGG	(((((((..((((&)))))))))))
F14F7.3.1	1154	1168	PAO_13120	3	19	-12.58	GAAUGUGCAGAUCCA&UGGGUCUGGGCAGAUUC	((((((.((((((((&)))))))).)))..)))
F12E12.1.1	88	108	PAO_13120	1	22	-12.51	UUCGGAGCCGCAGAAUCUACC&GGUGGGUCUGGGCAGAUUCGAA	(((((((((.(((.(((((((&)))))))))))))...))))))
C06A8.1a.1	1832	1846	PAO_13120	2	19	-12.5	GAUUGCCCAGCCAAC&GUGGGUCUGGGCAGAUUC	((((((((((((.((&)).)).))))))))..))
F42E11.1a.1	172	181	PAO_13120	4	13	-12.46	GUCCAGACCU&GGGUCUGGGC	((((((((((&))))))))))
F18E3.11.1	112	128	PAO_13120	1	16	-12.3	UCUGCUUCGUCUUCAUC&GGUGGGUCUGGGCAGA	(((((((.(.(.(((((&)))))).).)))))))
W02D3.5.1	372	398	PAO_13120	1	21	-12.3	UUGAAUCUGGAUCCGUUGUUUCUCGCC&GGUGGGUCUGGGCAGAUUCGA	(((((((((..((((......((((((&))))))..)))))))))))))
VC5.5.1	273	285	PAO_13120	1	15	-12.23	CUGUCCAACCGCC&GGUGGGUCUGGGCAG	(((((((.(((((&)))))...)))))))
R07E5.2.1	47	58	PAO_13120	1	15	-12.18	UUGCCACCCGCC&GGUGGGUCUGGGCAG	((((((((((((&)))))))...)))))
Y57A10C.6.1	736	748	PAO_13120	5	19	-12.18	GAAAGCCCAGGCC&GGUCUGGGCAGAUUC	(((.(((((((((&)))))))))...)))
C06E7.1a.1	842	859	PAO_13120	1	16	-12.13	UCUGGAAAAGACCCAACC&GGUGGGUCUGGGCAGA	((((....(((((((.((&)))))))))...))))
K07C5.4.1	1044	1061	PAO_13120	1	21	-12.08	UUGAAGACCAGAUCCAAC&GGUGGGUCUGGGCAGAUUCGA	(((((..(((((((((.(&).))))))))).....)))))
K11D12.3a.1	834	850	PAO_13120	1	16	-12.07	UCUGCUUCUUCUCCAUC&GGUGGGUCUGGGCAGA	(((((((...(.(((((&))))))...)))))))
C54G6.5.1	27	52	PAO_13120	1	21	-12.04	UCGUCCUUCUGCUCGUCGCCUCCACC&GGUGGGUCUGGGCAGAUUCGA	(((....((((((((..(.(.(((((&)))))).)))))))))..)))
F56E10.4.2	238	250	PAO_13120	1	13	-12.04	GGCCAAGCUCACC&GGUGGGUCUGGGC	(.(((.(((((((&))))))).))).)
Y57G11C.34.1	355	370	PAO_13120	1	21	-12.04	UCGAAUUAGACCCAUU&GGUGGGUCUGGGCAGAUUCGA	((((((((((((((((&))))))))).....)))))))
C31E10.7.1	410	422	PAO_13120	1	15	-12.03	CUGUUGAUCCACU&GGUGGGUCUGGGCAG	(((((((((((((&))))))))..)))))
C10H11.4.1	1262	1284	PAO_13120	1	22	-12	UUCGAAAUGCUCGGAUGAUUGCU&GGUGGGUCUGGGCAGAUUCGAA	((((((.(((((((((..(((((&))))))))))))))..))))))
F38E11.1.1	92	106	PAO_13120	2	18	-12	AAUCUGCAUGCCUAC&GUGGGUCUGGGCAGAUU	(((((((..((((((&))))))....)))))))
F53C3.6a.1	801	818	PAO_13120	1	17	-11.98	AUCUGUUGCAUUCCUACU&GGUGGGUCUGGGCAGAU	(((((((.((..((((((&))))))..)))))))))
F54C1.7.1	60	75	PAO_13120	1	16	-11.97	UCUGCCCGACGAAGCU&GGUGGGUCUGGGCAGA	((((((((((...(((&)))..))).)))))))
K11G9.1.1	221	234	PAO_13120	1	12	-11.94	CCCAGAUGCCCACC&GGUGGGUCUGGG	(((((..(((((((&))))))))))))
Y105E8A.4.1	303	318	PAO_13120	6	20	-11.88	CGGAUUUGCCUUAGGC&GUCUGGGCAGAUUCG	(((((((((((.((((&)))))))))))))))
K06A5.6.1	744	764	PAO_13120	2	22	-11.84	UUUGACAACGUUCGGGUCCAC&GUGGGUCUGGGCAGAUUCGAA	(((((....((((((((((((&))))))))))))....)))))
Y73C8C.2.1	258	282	PAO_13120	1	22	-11.78	UUCGAAUUUUUUGGCUUCUUCCGCC&GGUGGGUCUGGGCAGAUUCGAA	((((((((...((.((...((((((&))))))...)).))))))))))
B0205.13.1	146	168	PAO_13120	1	21	-11.75	UUGUUUCCGGUAUAAGAUUCACC&GGUGGGUCUGGGCAGAUUCGA	(((..((..((...(((((((((&)))))))))..)).))..)))
F31D4.9.2	217	235	PAO_13120	1	18	-11.72	AAUCGUCUCGGACCCUGCU&GGUGGGUCUGGGCAGAUU	((((..(((((((((.(((&))))))))))))..))))
F28A10.6.1	423	436	PAO_13120	1	13	-11.68	GCUCGGAUCCUACU&GGUGGGUCUGGGC	(((((((.((((((&)))))))))))))
C14C10.3a.1	730	758	PAO_13120	1	19	-11.67	GAAUCAGAUGCCCAGCUGUUUCACGUACC&GGUGGGUCUGGGCAGAUUC	(((((...(((((((.......((.((((&)))).))))))))))))))
ZK632.3.1	831	846	PAO_13120	1	15	-11.63	CUGCUCAAGACUCGGC&GGUGGGUCUGGGCAG	(((((((.((((((.(&).)))))))))))))
F54D11.1.1	1477	1492	PAO_13120	1	15	-11.58	UUGCCCAAAAACCAUU&GGUGGGUCUGGGCAG	(((((((....(((((&)))))...)))))))
R53.4.1	281	293	PAO_13120	2	17	-11.42	AUCUGCCUUCUAC&GUGGGUCUGGGCAGAU	(((((((((((((&)))))...))))))))
F41G3.10.1	87	111	PAO_13120	1	20	-11.41	CGGAUCUUAAUGGAGCUUGCCCACC&GGUGGGUCUGGGCAGAUUCG	(((((((.......(((((((((((&)))))))..)))))))))))
F16B4.9.1	394	418	PAO_13120	1	22	-11.39	UUUGAAACCAGUCAAGAGACCUACC&GGUGGGUCUGGGCAGAUUCGAA	((((((.(..(((...(((((((((&))))))))).))).).))))))
Y46H3D.6a.1	589	600	PAO_13120	1	13	-11.38	GCCCAGAACAUC&GGUGGGUCUGGGC	(((((((.((((&))))..)))))))
C30H6.7a.1	125	141	PAO_13120	3	21	-11.36	UUGAUGGAACAGGCCCA&UGGGUCUGGGCAGAUUCGA	((((..(..((((((((&))))))))..)....))))
DH11.2.1	1006	1034	PAO_13120	1	20	-11.33	CGAAUCUCAUGUACUGUAUAAGGCUGACC&GGUGGGUCUGGGCAGAUUCG	(((((((........((...(((((.(((&))).)))))..)))))))))
F40F4.2.2	508	527	PAO_13120	2	21	-11.31	UCGAAGGCCGCAGAUUCUAC&GUGGGUCUGGGCAGAUUCGA	(((((.(((.(((((((.((&))))))))))))...)))))
ZK1320.4.1	540	559	PAO_13120	2	21	-11.27	UGGAAAAGGCUCAGAGCUAU&GUGGGUCUGGGCAGAUUCGA	(.(((...(((((((.((((&)))).)))))))...))).)
Y54F10AM.5.1	253	270	PAO_13120	3	15	-11.26	CUGCCUUCCACAGACUCA&UGGGUCUGGGCAG	(((((.....((((((((&)))))))))))))
F56B3.5.1	727	751	PAO_13120	1	22	-11.23	UUUGGGCUCUCAGACUGAUAUUACC&GGUGGGUCUGGGCAGAUUCGAA	((((((((((((((((.....((((&)))))))))))).)).))))))
H06H21.6.1	106	126	PAO_13120	1	16	-11.23	UCUGCCCACGCUGGAGCCGCC&GGUGGGUCUGGGCAGA	(((((((.....(((.(((((&))))).))))))))))
C05D11.11a.1	824	843	PAO_13120	1	19	-11.14	GAAAGGGUGUCCGAUCUACC&GGUGGGUCUGGGCAGAUUC	(((....(((((((((((((&)))))))).)))))..)))
F54A5.2a.1	713	725	PAO_13120	2	15	-11.14	CUGUCGGACUCAC&GUGGGUCUGGGCAG	(((((((((((((&)))))))).)))))
E04A4.4a.1	1796	1827	PAO_13120	1	21	-11.11	UCGGAAUGUUCUGAAACCAAUGAAGACCUACU&GGUGGGUCUGGGCAGAUUCGA	(((((....((((...((.....(((((((((&))))))))))).)))))))))
F22B5.4.1	194	216	PAO_13120	2	21	-11.11	UCGUAAUUGGUCAAGAGAUCCAC&GUGGGUCUGGGCAGAUUCGA	(((.((((.(((...((((((((&)))))))).))).)))))))
F59B1.8.1	1108	1131	PAO_13120	1	20	-11.06	CUGAUCUCCUUGUUCGGGCCGGCU&GGUGGGUCUGGGCAGAUUCG	(.(((((....(((((((((.(((&))).)))))))))))))).)
F08F3.7.1	93	108	PAO_13120	1	16	-10.97	UCUGCCUGUUGUCACU&GGUGGGUCUGGGCAGA	((((((((...(((((&)))))...))))))))
D2023.2b.1	38	57	PAO_13120	1	16	-10.96	UCUGCUCAACGUUCUUCGCC&GGUGGGUCUGGGCAGA	((((((((((.....(((((&))))))).))))))))
F11G11.2.1	239	252	PAO_13120	2	15	-10.96	UUGCCCAAUCUCAU&GUGGGUCUGGGCAG	(((((((..(((((&)))))..)))))))
C14A4.14.1	2	12	PAO_13120	1	12	-10.78	UCCAGAUCUCC&GGUGGGUCUGGG	(((((((((((&)).)))))))))
C12D5.7.1	1369	1379	PAO_13120	3	14	-10.71	UGUCAGACCCA&UGGGUCUGGGCA	(((((((((((&)))))))).)))
M04F3.4a.1	403	425	PAO_13120	2	22	-10.65	UUUGCGUCGUUCUUCAGACCCUC&GUGGGUCUGGGCAGAUUCGAA	((((.(((....(((((((((.(&).)))))))))..))).))))
C29F5.1.1	126	149	PAO_13120	4	22	-10.63	UUCGAUAUGUCUGCCGACGGAUUC&GGGUCUGGGCAGAUUCGAA	(((((...(((((((..(((((((&)))))))))))))))))))
F40E10.3.1	1150	1168	PAO_13120	1	19	-10.58	GAUUCUUUCCGGAUCUAUU&GGUGGGUCUGGGCAGAUUC	((.(((.((((((((((((&)))))))))))).))).))
W10D9.5b.1	251	272	PAO_13120	1	21	-10.54	UUGAUCUUUUCCUAGAUUUUCC&GGUGGGUCUGGGCAGAUUCGA	(((((((...(((((((((.((&)).))))))))).))).))))
F09F3.9.1	1333	1351	PAO_13120	1	19	-10.25	GGAGCUGAGUUAGACCACC&GGUGGGUCUGGGCAGAUUC	(((.(((..((((((((((&))).))))))).))).)))
F53A2.7.1	568	584	PAO_13120	4	16	-10.2	UCUGAGAUCUCAGACCC&GGGUCUGGGCAGA	((((....(((((((((&)))))))))))))
K01D12.11.1	499	521	PAO_13120	1	22	-10.16	UUCGGUGAUCUCUUCAACUUGCC&GGUGGGUCUGGGCAGAUUCGAA	((((..(((((.(((((((((((&))))))).)))).)))))))))
K12G11.3.1	1122	1133	PAO_13120	1	13	-10.14	GCUUUACCCACU&GGUGGGUCUGGGC	((((.(((((((&)))))))..))))
R05D8.8.1	526	550	PAO_13120	1	21	-10.14	UCGGAGCAGGACCACAGGCUCAACC&GGUGGGUCUGGGCAGAUUCGA	(((((....(.((.((((((((.((&)))))))))))))...)))))
ZK822.5a.1	1403	1430	PAO_13120	2	22	-10.05	UUCGAAUCUCUUCUGUUUAAUUAUUUGC&GUGGGUCUGGGCAGAUUCGAA	((((((.....((((((((...((((((&)))))).))))))))))))))
Y22D7AL.5a.1	140	161	PAO_13120	3	20	-10.04	CGUCUCUGUCACUAUGGGCCCA&UGGGUCUGGGCAGAUUCG	((..((((((....((((((((&))))))))))))))..))
C17G10.8.1	1027	1050	PAO_13120	1	19	-10.03	GAAUUCUUGUUAAAAGACCCAACU&GGUGGGUCUGGGCAGAUUC	(((((..((((...(((((((.((&))))))))).)))))))))
ZC155.1.1	956	968	PAO_13120	1	13	-9.92	GCUACUGCCCACU&GGUGGGUCUGGGC	(((...(((((((&)))))))...)))
Y46H3A.2.1	159	176	PAO_13120	1	20	-9.82	UGGAUCUGUUCAAUUUCC&GGUGGGUCUGGGCAGAUUCG	((((((((((((((((((&)).)))).))))))))))))
C01G6.6a.1	846	866	PAO_13120	1	20	-9.8	UGAAUUUGUGACUGAUCCAUU&GGUGGGUCUGGGCAGAUUCG	(((((((((..(.((((((((&)))))))).).)))))))))
W02F12.2.1	643	661	PAO_13120	1	16	-9.73	UCUGUUCCAUUUGCUCGCC&GGUGGGUCUGGGCAGA	(((((.(((...(((((((&))))))).))))))))
D1025.4.1	64	80	PAO_13120	1	16	-9.71	UCUGCUUUCUUACUGCC&GGUGGGUCUGGGCAGA	(((((((.....(((((&)))))....)))))))
ZK652.2.1	125	145	PAO_13120	1	14	-9.7	UGCCAAAUGGACAGAUCCUCC&GGUGGGUCUGGGCA	((((.......(((((((.((&)).)))))))))))
F53F4.10.1	691	708	PAO_13120	4	19	-9.59	GAAACCCCGCCUGGACCU&GGGUCUGGGCAGAUUC	(((.(...((((((((((&)))))))))).).)))
Y50D4B.2a.1	631	652	PAO_13120	1	22	-9.57	UUGGAAUCUGAAUACGAUCUCU&GGUGGGUCUGGGCAGAUUCGAA	((.(((((((..((.(((((((&)).)))))))..))))))).))
C34C12.8.1	587	610	PAO_13120	1	20	-9.54	CGAAGCCGUUUUCCAGAUUCCAUC&GGUGGGUCUGGGCAGAUUCG	(((....(((((((((((.(((((&)))))))))))).)))))))
C02A12.1.1	324	335	PAO_13120	2	13	-9.5	GCCUGGGCUGAC&GUGGGUCUGGGC	(((((((((.((&)).)))))))))
F54D7.7.1	200	217	PAO_13120	1	17	-9.47	GUCUCCUUGUUACCUACU&GGUGGGUCUGGGCAGAU	(((((((....(((((((&)))))))..))).))))
Y49C4A.8a.1	1189	1204	PAO_13120	2	18	-9.47	GAUCUUCCAGAUUGGC&GUGGGUCUGGGCAGAUU	(((((((((((((.((&)).)))))))).)))))
F10E7.8a.1	2433	2448	PAO_13120	8	22	-9.44	UUCAAAUCUGCUCCAG&CUGGGCAGAUUCGAA	(((.(((((((.((((&))))))))))).)))
B0564.1a.1	148	159	PAO_13120	2	13	-9.43	GCUCAGAUUCGU&GUGGGUCUGGGC	((((((((((((&))))))))))))
R02E12.6.1	694	711	PAO_13120	1	18	-9.4	GAUUUGCCAGAAAAUACC&GGUGGGUCUGGGCAGAUU	(((((((((((...((((&))))..))).))))))))
B0457.6.1	51	73	PAO_13120	2	21	-9.37	UCUACAUCCUCCCAUCGAUUCGC&GUGGGUCUGGGCAGAUUCGA	((...(((..((((..(((((((&)))))))))))..)))..))
R07E3.1a.1	142	163	PAO_13120	2	19	-9.35	GAAAUCAUUGCUCAGAACAUGC&GUGGGUCUGGGCAGAUUC	(((.((..((((((((.(..((&))..))))))))))))))
D2063.1.1	839	856	PAO_13120	3	19	-9.21	GGACUUGCGAAAGACUCA&UGGGUCUGGGCAGAUUC	(((.((((...(((((((&)))))))..)))).)))
K07A12.3.1	8	14	PAO_13120	2	8	-9.14	GACCCAC&GUGGGUC	(((((((&)))))))
B0285.4.1	739	759	PAO_13120	1	20	-8.93	CGAACUUCUGAUGCAUUCACC&GGUGGGUCUGGGCAGAUUCG	((((((.((.(.(.(((((((&))))))))).)).)).))))
C52G5.2.1	411	427	PAO_13120	1	19	-8.79	GAAACAAUGGAUUCACC&GGUGGGUCUGGGCAGAUUC	(((.(..((((((((((&))))))))))....).)))
F43C1.7.1	480	508	PAO_13120	1	20	-8.79	CGAAUUCUCCCCGAAGAAACAGACUUCUC&GGUGGGUCUGGGCAGAUUCG	((((((..((.........(((((((.((&)).)))))))))..))))))
CD4.7a.1	358	371	PAO_13120	2	15	-8.68	UUGCUCACUUCCAU&GUGGGUCUGGGCAG	(((((((..(((((&)))))..)))))))
H12C20.3b.2	25	42	PAO_13120	1	18	-8.68	GAUUAUUUCAGACCAGCU&GGUGGGUCUGGGCAGAUU	((((..((((((((.(((&))).))))))))..))))
ZC97.1b.1	814	827	PAO_13120	5	18	-8.6	GGUGUGUUCAGAUU&GGUCUGGGCAGAUU	(((.((((((((((&)))))))))).)))
K08E5.1b.1	109	123	PAO_13120	1	15	-8.57	CUAACCAGGCUCGUU&GGUGGGUCUGGGCAG	((..(((((((((((&)))))))))))..))
M88.1.1	415	432	PAO_13120	1	18	-8.52	AGUUUGAUGUGGCCUACU&GGUGGGUCUGGGCAGAUU	((((((....((((((((&))))))))....))))))
F49E12.9a.1	178	191	PAO_13120	1	15	-8.5	UUGCUCCGCCUAUU&GGUGGGUCUGGGCAG	((((((.(((((((&)))))))..))))))
F28A12.4.1	275	285	PAO_13120	1	11	-8.37	CCGGAUCAGCC&GGUGGGUCUGG	(((((((.(((&))).)))))))
F08H9.6.1	469	488	PAO_13120	1	20	-8.28	CGUUUUGCAAACAGACUCCU&GGUGGGUCUGGGCAGAUUCG	((.(((((...(((((((((&)).))))))).)))))..))
F54B8.4a.1	216	232	PAO_13120	1	18	-8.02	AAUUCAACCAGCUCACU&GGUGGGUCUGGGCAGAUU	((((...((((((((((&))))))).)))...))))
F14F9.4.1	1570	1587	PAO_14304	5	23	-24.55	CAGUUGGUGGAAAGUUGG&CCAACUGCUCUACCGACUG	(((((((((((.((((((&))))))..)))))))))))
K01D12.10.1	523	540	PAO_14304	4	21	-22.52	GGAGGUGGAGGAGAUGGU&GCCAACUGCUCUACCGAC	(..(((((((.((.((((&)))).)).)))))))..)
F18E3.7a.1	564	582	PAO_14304	3	21	-22.13	GUACGGUGGAAAGUUGGCU&AGCCAACUGCUCUACCGAC	((.(((((((.((((((((&))))))))..)))))))))
R02E12.6.1	12	26	PAO_14304	2	19	-21.01	CGGUAGAGCACGCUU&AAGCCAACUGCUCUACCG	((((((((((.((((&))))....))))))))))
Y105E8A.4.1	539	554	PAO_14304	4	19	-20.82	CGGUGCAGCAGUUGGU&GCCAACUGCUCUACCG	(((((.((((((((((&)))))))))).)))))
D2063.1.1	668	688	PAO_14304	2	22	-18.94	AGUCUUGGAGCAGAAUGGUUU&AAGCCAACUGCUCUACCGACU	((((.((((((((..((((((&)))))).))))))))..))))
Y22D7AL.5a.1	1646	1661	PAO_14304	4	18	-18.91	GGAAGAAGCAGUUGGU&GCCAACUGCUCUACC	((.(((.(((((((((&)))))))))))).))
K09F6.10.1	2419	2435	PAO_14304	4	20	-18.85	UCGGUGGAGCAGCUUGC&GCCAACUGCUCUACCGA	((((((((((((.(.((&)).).))))))))))))
C06G3.1a.1	1377	1396	PAO_14304	4	22	-18.71	GGUGGAGUGGAGCAGUGUGC&GCCAACUGCUCUACCGACU	(((.(.((((((((((..((&))..))))))))))).)))
R08F11.4.1	985	1003	PAO_14304	6	22	-17.91	GGAAGGAAGAGAGCAGUUG&CAACUGCUCUACCGACU	((..((...((((((((((&)))))))))).))..))
Y53G8B.2.1	1035	1045	PAO_14304	9	19	-17.73	CGGUAGAGCGG&CUGCUCUACCG	(((((((((((&)))))))))))
C12D8.10a.1	1168	1182	PAO_14304	5	20	-17.42	UUGGUGGGGAGUUGG&CCAACUGCUCUACCGA	(((((((((((((((&)))))).)))))))))
M04F3.4a.1	474	490	PAO_14304	7	21	-17.36	GUCGGCUACGAGCAGUU&AACUGCUCUACCGAC	(((((.((.((((((((&)))))))))))))))
F08H9.6.1	4	17	PAO_14304	3	22	-17.31	AGUUGGAGUUGGCU&AGCCAACUGCUCUACCGACU	((((((((((((((&))))))))......))))))
F14H8.6b.1	1627	1646	PAO_14304	4	21	-17.16	GUCGGUAAUAUGGUGGUGGC&GCCAACUGCUCUACCGAC	(((((((....(((((((((&)))).))))).)))))))
F56B3.5.1	412	432	PAO_14304	4	22	-16.99	GGGAGGUGGAUUGGAGUUGGC&GCCAACUGCUCUACCGACU	((..((((((..(.(((((((&))))))).)))))))..))
C29F7.2a.1	629	645	PAO_14304	3	20	-16.88	UCGGAGAAAAGUUGGCU&AGCCAACUGCUCUACCGA	(((((((..((((((((&))))))))..))).))))
C47A10.1.1	2512	2531	PAO_14304	4	23	-16.69	CAGUUGGUGGAGGUCUCGGC&GCCAACUGCUCUACCGACUG	((((((((((((.....(((&))).....))))))))))))
Y82E9BR.18.1	299	311	PAO_14304	2	14	-16.63	GAGUAGUUGGCUU&AAGCCAACUGCUC	(((((((((((((&)))))))))))))
C25A1.7.1	2046	2058	PAO_14304	4	16	-16.22	UGGAGCAGAUGGU&GCCAACUGCUCUA	((((((((.((((&)))).))))))))
F54A5.2a.1	606	622	PAO_14304	4	21	-16.15	GUCCGUUAGCAGUUGGU&GCCAACUGCUCUACCGAC	(((.((.((((((((((&))))))))))..)).)))
D2023.2a.1	2089	2107	PAO_14304	3	19	-16.14	CGGUGGAGUUGUUGAAGCU&AGCCAACUGCUCUACCG	(((((((((.((((..(((&))))))).)))))))))
C27B7.1a.1	864	880	PAO_14304	6	22	-16.09	AGAGGAUGGAGCAAUUG&CAACUGCUCUACCGACU	((.((.(((((((.(((&))).)))))))))..))
F22E10.3.1	2471	2492	PAO_14304	1	21	-16.02	GUCGGUGUCGGAGUUUGGUUUU&AAAGCCAACUGCUCUACCGAC	(((((((..(.((.((((((((&)))))))))).)..)))))))
C06H2.1.1	364	385	PAO_14304	4	22	-15.79	AGAAGGUGGAGGAAAAGUGGGC&GCCAACUGCUCUACCGACU	((..(((((((.(...((.(((&))).))).)))))))..))
C44B7.10.1	1125	1143	PAO_14304	5	20	-15.76	UCCGUGGAGCAGCAAUUGG&CCAACUGCUCUACCGA	((.(((((((((...((((&))))))))))))).))
Y51A2D.9a.1	418	426	PAO_14304	4	12	-15.7	GCAGUUGGU&GCCAACUGC	(((((((((&)))))))))
C54G7.2.1	487	497	PAO_14304	9	19	-15.69	CGGAGGAGCAG&CUGCUCUACCG	(((.(((((((&))))))).)))
F54D5.12.1	684	694	PAO_14304	5	15	-15.45	AGGGCAGUUGG&CCAACUGCUCU	(((((((((((&)))))))))))
R03D7.1.1	929	945	PAO_14304	4	20	-15.43	UUGGUGGAUGCUGUGGU&GCCAACUGCUCUACCGA	((((((((.((.(((((&)))).).))))))))))
C37H5.3a.1	1116	1131	PAO_14304	5	19	-15.42	CGGAGAGCGCAGUUGG&CCAACUGCUCUACCG	(((..((.((((((((&)))))))).)).)))
Y46H3A.3a.1	357	372	PAO_14304	2	21	-15.4	GUUGGUGCAGUUGCUU&AAGCCAACUGCUCUACCGAC	((((((((((((((((&))).)))))))...))))))
C12D5.7.1	1035	1049	PAO_14304	6	20	-15.06	UCGAAUGAGCAGUUG&CAACUGCUCUACCGA	(((...(((((((((&)))))))))...)))
F11C1.5a.1	5134	5145	PAO_14304	7	19	-15.01	CGGUAGAGAGUU&AACUGCUCUACCG	((((((((((((&)))).))))))))
K02E11.10.1	329	352	PAO_14304	4	23	-14.92	CAUUCGGUGGACUUGGCGGUGGGU&GCCAACUGCUCUACCGACUG	((.((((((((....(((((.(((&))).))))))))))))).))
M60.7.1	1154	1170	PAO_14304	4	20	-14.9	UUGGUGAGCAGUAUGAC&GCCAACUGCUCUACCGA	((((((((((((.((.(&).))))))))).)))))
F58B3.1.1	271	283	PAO_14304	4	16	-14.87	UAGAGCAGCUGGC&GCCAACUGCUCUA	((((((((.((((&)))).))))))))
C52B9.7b.1	501	514	PAO_14304	9	22	-14.86	AGUUGGUGGAACAG&CUGCUCUACCGACU	((((((((((.(((&))).))))))))))
F08A8.3.1	395	413	PAO_14304	5	23	-14.82	CAGCAGGAGAAGUGGUUGG&CCAACUGCUCUACCGACUG	(((..(((((.((((((((&))))))))))).))..)))
F13C5.1.1	337	354	PAO_14304	4	22	-14.82	AGAAGGAGUGGAGUUGGC&GCCAACUGCUCUACCGACU	((..((((.(.(((((((&))))))).).)).))..))
F54D11.1.1	894	914	PAO_14304	3	22	-14.78	GGUGGUGGAGCUAGACAGGUU&AGCCAACUGCUCUACCGACU	(((((((((((.((...((((&))))..)))))))))).)))
W09H1.5.1	308	318	PAO_14304	13	23	-14.73	CGGUUGGUGGA&UCUACCGACUG	(((((((((((&)))))))))))
ZK1320.4.1	1557	1581	PAO_14304	2	23	-14.57	CAGUGCGUUGGAAUGCGAUUGGCUU&AAGCCAACUGCUCUACCGACUG	((((.((.((((..(((.(((((((&))))))).))))))).))))))
F53C3.6a.1	161	178	PAO_14304	4	22	-14.56	GGCGGUGGACGUGGUGGC&GCCAACUGCUCUACCGACU	(((((((((.((((((((&)))).))))))))))).))
F15E6.6.1	2089	2101	PAO_14304	4	15	-14.55	AGAGCAGUUUGGU&GCCAACUGCUCU	((((((((.((((&))))))))))))
Y48G8AL.5a.1	151	163	PAO_14304	6	18	-14.54	GGUGGAGAAGGAG&CAACUGCUCUACC	(((((((.((..(&)..)).)))))))
ZC376.7a.2	1	17	PAO_14304	3	17	-14.51	GUGCGAUGUGGUUGGUU&AGCCAACUGCUCUAC	(((.((.((((((((((&)))))))))))))))
F21F8.11.1	287	301	PAO_14304	6	20	-14.44	UUGGUGGAGGAGAUG&CAACUGCUCUACCGA	(((((((((.((.((&)).)).)))))))))
C14A4.14.1	992	1009	PAO_14304	5	23	-14.24	CAGAUCAGGAGCAGACGG&CCAACUGCUCUACCGACUG	(((.((.(((((((..((&))..)))))))...)))))
F49E8.5.1	261	279	PAO_14304	5	20	-14.21	UCGGAGGAUGUGCAGUUGG&CCAACUGCUCUACCGA	((((.(((...((((((((&))))))))))).))))
Y54E10A.17a.1	167	179	PAO_14304	5	18	-14.19	GGUCAGCAGUUGG&CCAACUGCUCUACC	(((.(((((((((&)))))))))..)))
F09F7.4a.1	372	382	PAO_14304	9	20	-14.11	UCGGAGAGUGG&CUGCUCUACCGA	(((((((((((&))))))).))))
F28F8.2.1	1488	1498	PAO_14304	11	21	-13.99	GUCGGUAGAAC&GCUCUACCGAC	(((((((((.(&).)))))))))
E02H1.3.1	678	689	PAO_14304	10	22	-13.89	GGUCGGUGAGCA&UGCUCUACCGACU	((((((((((((&))))).)))))))
R07E3.1a.1	282	293	PAO_14304	10	22	-13.89	AGUCGUAGAGCA&UGCUCUACCGACU	((((((((((((&))))))).)))))
M05D6.6.1	468	477	PAO_14304	6	15	-13.87	GGAGUAGUUG&CAACUGCUCU	((((((((((&))))))))))
R11A5.4d.4	28	36	PAO_14304	15	23	-13.79	CAGUCGGUG&UACCGACUG	(((((((((&)))))))))
C35B1.2a.1	1460	1479	PAO_14304	2	21	-13.75	GUUGGUGAAGAAGUUGAAUU&AAGCCAACUGCUCUACCGAC	(((((((.((.(((((..((&))..))))).)).)))))))
B0285.4.1	575	593	PAO_14304	4	22	-13.72	AGUUGGAUCAAAAGUUGGC&GCCAACUGCUCUACCGACU	((((((......(((((((&)))))))......))))))
C02A12.4.1	634	651	PAO_14304	5	23	-13.6	CAGCGGUGGAGUCACUGG&CCAACUGCUCUACCGACUG	((((((((((((...(((&)))...))))))))).)))
F09F3.9.1	1300	1313	PAO_14304	5	18	-13.59	GGUGGGGCUACUGG&CCAACUGCUCUACC	((((((((...(((&)))...))))))))
F41B5.3a.1	166	189	PAO_14304	5	23	-13.51	CAGACGGUGGACUAAGCAGUUCGG&CCAACUGCUCUACCGACUG	(((.(((((((....((((((.((&))))))))))))))).)))
Y50D4B.2b.1	25	44	PAO_14304	2	21	-13.48	GUCUAUGGAGCAACUGGUUU&AAGCCAACUGCUCUACCGAC	(((..(((((((..((((((&))))))..)))))))..)))
W10D9.5b.1	131	144	PAO_14304	3	15	-13.46	GGAGUGGUGUGGCU&AGCCAACUGCUCU	((((((((.(((((&)))))))))))))
H06H21.6.1	642	659	PAO_14304	5	22	-13.44	AGUUGCAUCAGUAGUUGG&CCAACUGCUCUACCGACU	(((((....(((((((((&)))))))))....)))))
E04A4.4a.1	1623	1631	PAO_14304	7	15	-13.43	AGAGCAGUU&AACUGCUCU	(((((((((&)))))))))
VC5.5.1	921	929	PAO_14304	15	23	-13.41	UAGUCGGUG&UACCGACUG	(((((((((&)))))))))
C36A4.9a.1	855	869	PAO_14304	5	19	-13.39	CGGUAGAAUGGAUGG&CCAACUGCUCUACCG	(((((((.(((.(((&))).))).)))))))
C05E4.9a.1	616	625	PAO_14304	11	20	-13.3	UCGGUGGAGC&GCUCUACCGA	((((((((((&))))))))))
F28A10.6.1	536	553	PAO_14304	2	20	-13.24	UCAGUGGAGCAGGAACUU&AAGCCAACUGCUCUACCGA	((.(((((((((...(((&)))....))))))))).))
Y60A3A.7.1	612	634	PAO_14304	5	22	-13.16	GGUCGGUGAGAAUGCGGAUUUGG&CCAACUGCUCUACCGACU	(((((((.(((..((((..((((&))))))))))))))))))
K01C8.10.1	1274	1281	PAO_14304	11	18	-13.13	GGUGGAGC&GCUCUACC	((((((((&))))))))
K08D9.4b.1	108	131	PAO_14304	7	22	-13.08	AGAUUGGUAGAUUUAAAUGCAGUU&AACUGCUCUACCGACU	((.((((((((.......((((((&))))))))))))))))
F44C8.1.1	1019	1033	PAO_14304	9	22	-13.01	GGUUGGUAGUGAUAG&CUGCUCUACCGACU	(((((((((.(.(((&)))).)))))))))
C05A9.1a.1	1583	1600	PAO_14304	3	21	-12.89	GUUGGUGAGAGAGGAGCU&AGCCAACUGCUCUACCGAC	(((((((.(((((..(((&)))...)).))))))))))
K08E7.9.1	2684	2691	PAO_14304	4	11	-12.82	CGGUUGGC&GCCAACUG	((((((((&))))))))
K10D2.6.1	1700	1711	PAO_14304	4	15	-12.81	AGAUGAGUUGGC&GCCAACUGCUCU	(((..(((((((&)))))))..)))
ZK896.5.2	48	75	PAO_14304	1	21	-12.8	GUUGGAAUUUGUUGAGUAUUUUGGUUUU&AAAGCCAACUGCUCUACCGAC	(((((........(((((..((((((((&)))))))).)))))..)))))
F43E2.3b.1	253	267	PAO_14304	10	23	-12.78	CGGUCGGCUACAGCA&UGCUCUACCGACUG	(((((((.((.((((&)))).)))))))))
F58F9.7.1	711	731	PAO_14304	3	18	-12.78	GGCAGGGAGUAGAAAAUGGCU&AGCCAACUGCUCUACC	((...(((((((....(((((&))))).))))))).))
M117.2a.3	734	744	PAO_14304	5	15	-12.73	AGAGCAGGAGG&CCAACUGCUCU	(((((((..((&))..)))))))
F57C12.4.1	1258	1266	PAO_14304	13	21	-12.72	GUCGGUGGA&UCUACCGAC	(((((((((&)))))))))
F42E11.1a.1	585	595	PAO_14304	13	23	-12.63	CAGUUGGUGGA&UCUACCGACUG	(((((((((((&)))))))))))
C01B12.3.1	759	770	PAO_14304	8	20	-12.55	UUGGUAGACAGU&ACUGCUCUACCGA	((((((((((((&)))).))))))))
F07F6.8.1	52	68	PAO_14304	5	23	-12.45	CAGUCGGAAGACAACGG&CCAACUGCUCUACCGACUG	(((((((.(((((..((&))...)).))).)))))))
F57B10.3b.1	20	30	PAO_14304	14	23	-12.45	CAGUUCGGUGG&CUACCGACUG	(((.(((((((&))))))))))
Y57A10C.6.1	1186	1197	PAO_14304	5	16	-12.41	UGGAGUAGUUGG&CCAACUGCUCUA	((((((((((((&))))))))))))
F56C11.6a.1	273	292	PAO_14304	9	23	-12.33	CAGUCGGGAAAAGUGAGGAG&CUGCUCUACCGACUG	(((((((.......(((.((&)).)))..)))))))
F43C1.7.1	348	367	PAO_14304	2	23	-12.3	CAGACAGGAGAGAUUGGUUU&AAGCCAACUGCUCUACCGACUG	(((...((((((.(((((((&)))))))...)))).))..)))
K09A9.1.1	1608	1617	PAO_14304	6	15	-12.27	AGAGCAGAUG&CAACUGCUCU	(((((((.((&)).)))))))
C08F8.2b.1	891	903	PAO_14304	3	16	-12.25	UGGAGCAGCUGCU&AGCCAACUGCUCUA	((((((((..(((&)))...))))))))
F26D10.9a.1	954	963	PAO_14304	13	22	-12.19	AGUUGGUAGA&UCUACCGACU	((((((((((&))))))))))
ZK617.2.1	60	72	PAO_14304	1	13	-12.19	AGCUGUUGGCUUU&AAAGCCAACUGCU	(((.(((((((((&))))))))).)))
C14B1.3.1	334	348	PAO_14304	9	22	-12.16	AGUGGAGAAGAGCAG&CUGCUCUACCGACU	(((.(.(.(((((((&))))))).)).)))
ZK822.5a.1	827	845	PAO_14304	3	16	-12.11	UGGAGUUAACCAGUUGGCU&AGCCAACUGCUCUA	(((((.....(((((((((&))))))))))))))
C54D10.1.1	40	59	PAO_14304	1	23	-12.05	UAGUUGGAGCCGUUGGGUUU&AAAGCCAACUGCUCUACCGACUG	((((((((((.(((((.(((&))).))))).)))...)))))))
C15H11.3.1	1279	1291	PAO_14304	11	23	-12.02	CAGCGCGUGGAGC&GCUCUACCGACUG	(((((.(((((((&))))))))).)))
M88.1.1	535	543	PAO_14304	15	23	-12.01	CAGUCGGUG&UACCGACUG	(((((((((&)))))))))
C31C9.1a.1	889	915	PAO_14304	4	21	-11.99	GUCGUACAAUCUAGUGGAGCCAAUUGC&GCCAACUGCUCUACCGAC	((((.........(((((((.....((&)).....)))))))))))
C52E4.1.1	973	981	PAO_14304	7	15	-11.95	AGAGCGGUU&AACUGCUCU	(((((((((&)))))))))
C46F4.2.1	1990	2000	PAO_14304	3	13	-11.91	AGGAGUUGGCU&AGCCAACUGCU	((.((((((((&)))))))).))
C01A2.4.1	266	278	PAO_14304	4	17	-11.9	GUGGAGUACAGGC&GCCAACUGCUCUAC	((((((((..(((&)))...))))))))
Y38F1A.6.1	569	580	PAO_14304	10	21	-11.88	GUUGGUGGAGGA&UGCUCUACCGAC	((((((((((.(&).))))))))))
C12C8.1.1	204	216	PAO_14304	9	21	-11.87	GUUGGUGAUGCAG&CUGCUCUACCGAC	(((((((..((((&))))..)))))))
K07C5.4.1	928	944	PAO_14304	4	20	-11.85	UCGGAGAACAAGUUGGU&GCCAACUGCUCUACCGA	(((((((.(.(((((((&)))))))).))).))))
Y73C8B.1.1	136	156	PAO_14304	7	20	-11.8	UUGGUAGAUUUAAAUGCAGUU&AACUGCUCUACCGA	((((((((.......((((((&))))))))))))))
E03H4.7.1	501	507	PAO_14304	16	22	-11.73	AGUCGGU&ACCGACU	(((((((&)))))))
Y54F10AM.5.1	287	311	PAO_14304	1	21	-11.73	GUUGAUCAGAGCAGUGCCAAGCUUU&AAAGCCAACUGCUCUACCGAC	((((...((((((((.....(((((&)))))..))))))))..))))
ZK455.4.1	582	597	PAO_14304	4	20	-11.73	UCAGUACGUAGUUGGC&GCCAACUGCUCUACCGA	((.(((.(((((((((&)))))))))..))).))
F02A9.4.1	301	320	PAO_14304	5	23	-11.67	CAGCCGGGAGCAGAAGUUGG&CCAACUGCUCUACCGACUG	(((.(((((((((...((((&)))))))))))..)).)))
K06A5.6.1	280	294	PAO_14304	9	22	-11.67	AGUAUGGUGGACCAG&CUGCUCUACCGACU	(((.(((((((.(((&))).))))))))))
C15B12.8.1	3	15	PAO_14304	10	22	-11.5	GGUUGGUAAGGCA&UGCUCUACCGACU	((((((((.((((&)))).))))))))
C07G3.2.1	573	589	PAO_14304	9	22	-11.45	AGUCUAACAGAGAGCAG&CUGCUCUACCGACU	((((......(((((((&)))))))...))))
Y46G5A.18b.1	1427	1452	PAO_14304	2	22	-11.41	AGUCGAUGGACGGCGAGAUUUGGUUU&AAGCCAACUGCUCUACCGACU	(((((.(((((((......(((((((&)))))))))).)))).)))))
F14F7.3.1	695	705	PAO_14304	8	21	-11.4	GUCAGGGCAGU&ACUGCUCUACCGAC	(((((((((((&))))))))...)))
K11G9.1.1	984	1000	PAO_14304	9	23	-11.38	UAGUUGGGAACGAGGGG&CUGCUCUACCGACUG	(((((((....(((.((&)).)))..)))))))
C27H6.4b.1	240	248	PAO_14304	5	14	-11.36	GAGUAGUGG&CCAACUGCUC	(((((((((&)).)))))))
F32D8.12a.1	425	448	PAO_14304	2	23	-11.34	CAGUUGAUCCUGGAGCAGAUGCUU&AAGCCAACUGCUCUACCGACUG	((((((....((((((((..((((&))))...)))))))).))))))
DH11.2.1	494	508	PAO_14304	4	15	-11.28	GGAGCAGAAUGUGGU&GCCAACUGCUCU	(((((((....((((&)))).)))))))
C55B7.3.1	277	286	PAO_14304	7	16	-11.22	UGGAGCAGUU&AACUGCUCUA	((((((((((&))))))))))
F10E7.8a.1	1672	1684	PAO_14304	8	20	-11.22	UCUGUGGAGCUGU&ACUGCUCUACCGA	((.(((((((.((&)).))))))).))
F52E4.5.1	305	316	PAO_14304	5	16	-11.2	UGGAGCAAUUGG&CCAACUGCUCUA	(((((((.((((&)))).)))))))
F54D8.3a.1	567	583	PAO_14304	3	20	-11.2	UUGGACCAGCGUUGGCU&AGCCAACUGCUCUACCGA	((((...((((((((((&))))))).)))...))))
R04B5.6.1	249	266	PAO_14304	4	22	-11.19	AGUUGGUGACAGAAUUGC&GCCAACUGCUCUACCGACU	((((((((((((....((&))...))).)).)))))))
Y58A7A.3.1	1542	1559	PAO_14304	5	23	-11.19	UGGUUGGAGGAAAAUUGG&CCAACUGCUCUACCGACUG	((((((((((..(.((((&)))).)..))).)))))))
W01A8.1a.1	330	346	PAO_14304	5	21	-11.12	GUUGGUGGUACAUUCGG&CCAACUGCUCUACCGAC	((((((((..((.(.((&)).).))..))))))))
C47E12.1.1	547	568	PAO_14304	1	22	-11.1	GGUUGUGAUGGUUGAUGGCUUU&AAAGCCAACUGCUCUACCGACU	(((((..(.(((.(.(((((((&))))))).).))).)..)))))
Y37E3.9.1	107	120	PAO_14304	8	22	-11.08	GGUCAACGAGCAGU&ACUGCUCUACCGACU	((((...(((((((&)))))))....))))
C05C10.3.1	642	648	PAO_14304	9	15	-11.02	AGAGCAG&CUGCUCU	(((((((&)))))))
DC2.5a.1	119	130	PAO_14304	5	19	-11.02	UGGUAGACAGGG&CCAACUGCUCUACCG	((((((((((((&))..))).)))))))
C05D11.11b.3	47	53	PAO_14304	9	15	-10.93	AGAGCAG&CUGCUCU	(((((((&)))))))
B0205.6.1	763	773	PAO_14304	12	21	-10.88	GUCUGGUGGAG&CUCUACCGAC	(((.(((((((&))))))))))
Y49C4A.8a.1	1653	1662	PAO_14304	4	13	-10.81	GGCAGUUGUC&GCCAACUGCU	((((((((.(&).))))))))
B0272.3.1	381	395	PAO_14304	6	23	-10.78	CAGAGGUGGAGGUUG&CAACUGCUCUACCGACUG	(((.(((((((((((&))))..)))))))..)))
F37B4.7.1	116	134	PAO_14304	5	23	-10.66	CGGUACAAUGGAGCAAUGG&CCAACUGCUCUACCGACUG	((((.(..(((((((.(((&)))..)))))))..)))))
C15C8.3a.1	1282	1298	PAO_14304	4	15	-10.65	AGAGCGGAAGACUUGGC&GCCAACUGCUCU	(((((((.....(((((&))))))))))))
F08F3.7.1	1402	1408	PAO_14304	16	22	-10.53	GGUCGGU&ACCGACU	(((((((&)))))))
F12E12.11.1	326	335	PAO_14304	6	15	-10.52	GGAGCAGCUG&CAACUGCUCU	(((((((.((&)).)))))))
F53A2.7.1	155	168	PAO_14304	4	18	-10.49	GUUGGAGCAGAUGC&GCCAACUGCUCUACC	(.((((((((..((&))...)))))))).)
C16A3.7.1	307	314	PAO_14304	16	23	-10.47	CAGUCGGU&ACCGACUG	((((((((&))))))))
K07A12.3.1	30	40	PAO_14304	4	14	-10.44	GAAAAGUUGGC&GCCAACUGCUC	((..(((((((&)))))))..))
F28A12.4.1	443	460	PAO_14304	6	22	-10.4	AGAUCGGUGGAUCAGGAG&CAACUGCUCUACCGACU	((.((((((((.(((..(&)..))).))))))))))
C06A8.1b.1	2	9	PAO_14304	16	23	-10.35	CAGUCGGU&ACCGACUG	((((((((&))))))))
C34E10.6.1	442	464	PAO_14304	4	23	-10.35	CAGUCGGACCAGAAACUCUUGGC&GCCAACUGCUCUACCGACUG	(((((((...(((..(..(((((&)))))..).))).)))))))
F09B12.3.1	980	986	PAO_14304	17	23	-10.34	CAGUCGG&CCGACUG	(((((((&)))))))
Y53F4B.33.1	257	272	PAO_14304	3	15	-10.26	GGAGCAGGCUUGGGCU&AGCCAACUGCUCU	(((((((.....((((&))))..)))))))
B0399.2.1	1583	1589	PAO_14304	9	15	-10.18	GGAGCAG&CUGCUCU	(((((((&)))))))
F28C10.3.1	379	401	PAO_14304	1	23	-10.17	CAGACGAAACGGCAUUUGGUUUU&AAAGCCAACUGCUCUACCGACUG	(((.((....((((.((((((((&)))))))).))))....)).)))
K07E3.8.2	76	104	PAO_14304	2	23	-10.17	CAGUCACAAUGGAUCUUAGCUCUUGGUUU&AAGCCAACUGCUCUACCGACUG	(((((....((((.....((..(((((((&)))))))..))))))..)))))
C49G7.3.1	858	869	PAO_14304	4	16	-10.12	UAGAGCAUUGCC&GCCAACUGCUCUA	((((((((((.(&).))).)))))))
ZC97.1a.1	555	562	PAO_14304	15	22	-10.07	AGUCGGUG&UACCGACU	((((((((&))))))))
K02E2.4.1	156	166	PAO_14304	10	20	-9.99	UCUGUGGAGCA&UGCUCUACCGA	((.((((((((&)))))))).))
C14C10.3a.1	948	956	PAO_14304	8	16	-9.98	UGGGGCAGU&ACUGCUCUA	(((((((((&)))))))))
F55F8.5.1	230	236	PAO_14304	16	22	-9.96	GGUUGGU&ACCGACU	(((((((&)))))))
R07E5.2.1	521	538	PAO_14304	6	23	-9.77	CAGUUGGAAGAUCUGUUG&CAACUGCUCUACCGACUG	(((((((.(((.(.((((&)))).).))).)))))))
C49A9.8.1	1233	1243	PAO_14304	9	19	-9.76	CGGCGGAGCAG&CUGCUCUACCG	(((.(((((((&))))))).)))
R151.9.1	254	276	PAO_14304	5	23	-9.75	CAUUUGGUGGAGAUCGGAACUGG&CCAACUGCUCUACCGACUG	((.(((((((((..(((...(((&))).)))))))))))).))
C07D10.2a.1	42	49	PAO_14304	16	23	-9.66	CAGUUGGU&ACCGACUG	((((((((&))))))))
CD4.7b.1	650	658	PAO_14304	2	10	-9.63	GGUUGGCUU&AAGCCAACU	(((((((((&)))))))))
B0361.8.1	170	182	PAO_14304	4	19	-9.4	CGGUGGAGGUGGU&GCCAACUGCUCUACCG	(((((((((((((&)))).)..))))))))
R05D8.8.1	135	149	PAO_14304	3	18	-9.35	GGUAGAGCCACUGCU&AGCCAACUGCUCUACC	((((((((....(((&))).....))))))))
W03G1.5.1	73	87	PAO_14304	4	22	-9.32	AGCGAGAGCGGAUGC&GCCAACUGCUCUACCGACU	(((((((((((..((&))...)))))))..)).))
F57B9.6a.3	1499	1521	PAO_14304	1	22	-9.08	AGUUAUAGAGCCACCUUGGUUUU&AAAGCCAACUGCUCUACCGACU	((((.((((((....((((((((&))))))))..))))))..))))
C52G5.2.1	561	571	PAO_14304	6	16	-9.05	UGGAGCAAGUG&CAACUGCUCUA	(((((((..((&))..)))))))
F53F4.10.1	505	518	PAO_14304	5	17	-9.02	GUAGAGUGCCUUGG&CCAACUGCUCUAC	((((((((..((((&)))).))))))))
Y46H3D.6a.1	702	711	PAO_14304	6	15	-8.95	GGAGCAGAUG&CAACUGCUCU	(((((((.((&)).)))))))
F49E12.9a.1	546	570	PAO_14304	2	20	-8.87	UUGGUACUUUCCAGCAGUUUGGUUU&AAGCCAACUGCUCUACCGA	((((((......(((((((.(((((&)))))))))))).))))))
R12E2.11.1	278	298	PAO_14304	3	21	-8.87	GUUGUUGGAGUACCAUAUGCU&AGCCAACUGCUCUACCGAC	((((.(((((((......(((&)))....))))))).))))
F59B1.8.1	1091	1106	PAO_14304	4	23	-8.77	CAGUUGGAGCAUUGAC&GCCAACUGCUCUACCGACUG	((((((((((((((.(&).))).))))...)))))))
W02D3.5.1	339	345	PAO_14304	3	9	-8.76	GUUGGCU&AGCCAAC	(((((((&)))))))
F44C4.3.1	525	542	PAO_14304	4	21	-8.73	GUCAAGAGCGGAUUCUGC&GCCAACUGCUCUACCGAC	(((.(((((((.((..((&)).)))))))))...)))
F27D4.1.1	794	804	PAO_14304	13	22	-8.68	AGUCGGUCAGA&UCUACCGACU	(((((((.(((&))))))))))
C37A5.1.1	991	997	PAO_14304	3	9	-8.62	GUUGGCU&AGCCAAC	(((((((&)))))))
F40E10.3.1	188	194	PAO_14304	14	20	-8.53	UCGGUAG&CUACCGA	(((((((&)))))))
C27A7.5a.1	51	57	PAO_14304	9	15	-8.5	GGAGCAG&CUGCUCU	(((((((&)))))))
W02F12.2.1	610	617	PAO_14304	1	8	-8.35	UUGGCUUU&AAAGCCAA	((((((((&))))))))
K11D12.3a.1	910	918	PAO_14304	1	9	-8.32	GUUGGUUUU&AAAGCCAAC	(((((((((&)))))))))
C06E7.1a.1	1156	1162	PAO_14304	9	15	-8.2	GGAGCAG&CUGCUCU	(((((((&)))))))
C23H5.8a.1	174	181	PAO_14304	3	10	-8.2	AGUUGGCU&AGCCAACU	((((((((&))))))))
ZK632.3.2	158	168	PAO_14304	10	19	-8.18	CGCGUGGGGCA&UGCUCUACCG	((.((((((((&))))))))))
C10H11.4.1	1206	1216	PAO_14304	2	12	-8.15	GGAAUUGGCUU&AAGCCAACUGC	(.(.(((((((&))))))).).)
F42E11.1a.1	1678	1687	PAO_14306	6	15	-16.62	GUCCGGUGGC&GCUACCGGAC	((((((((((&))))))))))
F28A10.6.1	1083	1092	PAO_14306	6	15	-16.55	GUUCGGUGGC&GCUACCGGAC	((((((((((&))))))))))
C05E4.9b.1	2794	2819	PAO_14306	1	22	-16.51	UGGCUCAGAGGAACCGGAUGCGUGCC&GGCGCGCUACCGGACUGCGCUA	((((.(((.....((((..(((((((&)))))))..)))).))).))))
ZC376.7a.1	1331	1347	PAO_14306	8	23	-15.56	AUAGCAGCAGUUCGGUA&UACCGGACUGCGCUAU	(((((.(((((((((((&))))))))))))))))
C05C10.4.1	463	486	PAO_14306	1	20	-15.24	GUCGAUGGUCCGGAUCAGUGUGCC&GGCGCGCUACCGGACUGCGC	(.((.((((((((...((((((((&)))))))).)))))))))))
F57B10.3b.1	21	31	PAO_14306	6	16	-14.94	AGUUCGGUGGC&GCUACCGGACU	(((((((((((&)))))))))))
F44C4.3.1	560	580	PAO_14306	1	21	-14.77	GGCUCAGUUCGGAUGCAAGCC&GGCGCGCUACCGGACUGCGCU	(((.((((((((..((..(((&)))..))..)))))))).)))
C47A10.1.1	3518	3527	PAO_14306	6	15	-14.73	GUCCGGUGGC&GCUACCGGAC	((((((((((&))))))))))
W07B8.5.1	618	636	PAO_14306	1	19	-14.64	CCCAGUUCGGAUGCAAGCC&GGCGCGCUACCGGACUGCG	(.((((((((..((..(((&)))..))..)))))))).)
C28C12.7b.1	1243	1259	PAO_14306	1	19	-14.23	CGCAGUCCUUGCAAGCC&GGCGCGCUACCGGACUGCG	((((((((..((..(((&)))..))....))))))))
Y57A10C.6.1	660	688	PAO_14306	1	21	-14.13	AGUGCAGUCCAACAUCCGACGGAGCCGCC&GGCGCGCUACCGGACUGCGCU	((((((((((..........(((((((((&)))).))).))))))))))))
R02E12.6.1	11	17	PAO_14306	7	13	-14.09	CCGGUAG&CUACCGG	(((((((&)))))))
C29F5.1.1	114	140	PAO_14306	1	25	-13.91	GUAUAGCCGCUGUUCGAUAUGUCUGCC&GGCGCGCUACCGGACUGCGCUAUAC	(((((((.((.(((((.((.((.((((&)))).)))).))))).)))))))))
F56C11.6a.1	1326	1334	PAO_14306	6	14	-13.8	UCCGGUGGC&GCUACCGGA	(((((((((&)))))))))
K09A9.1.1	1074	1090	PAO_14306	4	21	-13.16	AGAUCAGUCCGAAGCGC&GCGCUACCGGACUGCGCU	((..(((((((.(((((&)))))..)))))))..))
C31C9.1a.1	46	64	PAO_14306	1	20	-13.13	GCUCAUUUUGGUGGUGGCC&GGCGCGCUACCGGACUGCGC	((.((.(((((((((((((&))).)))))))))).)).))
F37B4.2.1	1449	1467	PAO_14306	1	21	-13.02	AGUGCAGCUGGUAGACACC&GGCGCGCUACCGGACUGCGCU	((((((((((((((.(.((&)).)..))))))).)))))))
C14C10.3c.1	2084	2104	PAO_14306	1	23	-12.95	AUGAAGCAGUCCAUGGUGUCC&GGCGCGCUACCGGACUGCGCUAU	(((..(((((((.((((((((&)).))))))..)))))))..)))
C36A4.9a.1	854	860	PAO_14306	7	13	-12.88	CCGGUAG&CUACCGG	(((((((&)))))))
C05A9.1a.1	1355	1362	PAO_14306	7	14	-12.8	UCCGGUAG&CUACCGGA	((((((((&))))))))
F43E2.5.2	75	95	PAO_14306	1	23	-12.73	AUGGCUUAUUUGGAGCGUGCC&GGCGCGCUACCGGACUGCGCUAU	(((((.(((((((((((((((&)))))))).))))).)).)))))
F07F6.8.1	585	593	PAO_14306	7	15	-12.44	GUUCGGUGG&CUACCGGAC	(((((((((&)))))))))
C52E4.1.1	94	110	PAO_14306	1	20	-12.29	GCGCAGUCACGCUUGCC&GGCGCGCUACCGGACUGCGC	((((((((..((.((((&)))).)).....))))))))
F26D10.9b.1	40	47	PAO_14306	6	13	-12.21	CCGGUGGC&GCUACCGG	((((((((&))))))))
Y53G8B.2.1	1027	1044	PAO_14306	3	22	-12.17	UGGUGCUCCGGUAGAGCG&CGCGCUACCGGACUGCGCUA	((((((((((((((.(((&))).))))))))..))))))
F54B8.4b.1	138	155	PAO_14306	6	21	-12.16	AGAUGCAGUCCGUGAAGC&GCUACCGGACUGCGCU	((.(((((((((.(.(((&))).))))))))))))
B0205.6.1	763	771	PAO_14306	7	15	-12.14	GUCUGGUGG&CUACCGGAC	(((((((((&)))))))))
C37H5.3a.1	128	150	PAO_14306	2	24	-12.05	UAGUGUGCAGUUUGAGAGAGCGC&GCGCGCUACCGGACUGCGCUAUA	((..((((((((((..((.((((&)))).))..))))))))))..))
C16A3.7.1	2120	2137	PAO_14306	1	20	-11.92	GUGGAGUUCAUGUGUGCC&GGCGCGCUACCGGACUGCGC	(((.(((((..(((((((&)))))))....))))).)))
E03H4.7.1	1698	1705	PAO_14306	7	14	-11.92	UCCGGUAG&CUACCGGA	((((((((&))))))))
ZK896.5.1	449	462	PAO_14306	1	16	-11.71	GGUCUGUGCGCGCC&GGCGCGCUACCGGACU	((((((.(((((((&)))))))...))))))
F11C1.5a.1	3066	3073	PAO_14306	6	13	-11.6	CCGGUGGC&GCUACCGG	((((((((&))))))))
C30H6.7a.1	200	209	PAO_14306	6	16	-11.5	AGCCGGUGGC&GCUACCGGACU	((((((((((&)))))))).))
C54G7.2.1	875	881	PAO_14306	9	15	-11.41	GUCCGGU&ACCGGAC	(((((((&)))))))
F15E6.7b.1	515	529	PAO_14306	6	20	-11.39	GCGCCAGUCCGGAGU&GCUACCGGACUGCGC	((((.((((((((((&))).)))))))))))
Y58A7A.3.1	1337	1344	PAO_14306	1	8	-11.38	AGCGCGCC&GGCGCGCU	((((((((&))))))))
W02F12.2.1	22	29	PAO_14306	6	13	-11.31	CCGGUGGU&GCUACCGG	((((((((&))))))))
F49E12.9a.1	790	797	PAO_14306	9	16	-11.28	AGUCCGGU&ACCGGACU	((((((((&))))))))
D2063.1.1	566	582	PAO_14306	1	18	-11.21	GGAGCUGGUGGUGGGCU&GGCGCGCUACCGGACUGC	(.(((((((((((.(((&))).))))))))).)).)
C52G5.2.1	54	75	PAO_14306	1	21	-11.17	GGCGCAGUUUUGUGGAUAUGUC&GGCGCGCUACCGGACUGCGCU	((((((((((.((((.(.((((&)))).))))).))))))))))
H06H21.6.1	1378	1384	PAO_14306	8	14	-11.15	UCCGGUA&UACCGGA	(((((((&)))))))
K11G9.1.1	365	383	PAO_14306	5	25	-11.14	GUAUAUGUGCACGGUGGUG&CGCUACCGGACUGCGCUAUAC	(((((.(((((((((((((&))))))))...))))))))))
K02F2.2.1	621	640	PAO_14306	1	17	-10.92	CAGACGGAAUCAAGCGCGCC&GGCGCGCUACCGGACUG	(((.(((.....((((((((&)))))))).)))..)))
E04A4.4a.1	614	620	PAO_14306	6	12	-10.88	CGGUAGC&GCUACCG	(((((((&)))))))
F10E7.8a.1	474	495	PAO_14306	1	21	-10.86	AGUGCAGAUUUGGAAGUUCGUU&GGCGCGCUACCGGACUGCGCU	(((((((.(((((.(((.((((&)))).))).))))))))))))
K08E7.9.1	1160	1167	PAO_14306	8	15	-10.86	GUCUGGUA&UACCGGAC	((((((((&))))))))
Y50D4B.2b.1	225	231	PAO_14306	10	16	-10.82	GGUCCGG&CCGGACU	(((((((&)))))))
C01B12.3.1	749	765	PAO_14306	7	23	-10.78	AUAGCGUUGUUUGGUAG&CUACCGGACUGCGCUAU	(((((((.(((((((((&))))))))).)))))))
Y54E10A.17b.1	90	108	PAO_14306	1	22	-10.77	UAGUGCUCGGUGGCAGGUU&GGCGCGCUACCGGACUGCGCUA	((((((((((((((..(((&)))..))))))))...))))))
C12D8.11.1	1452	1460	PAO_14306	6	14	-10.75	UCUGGUAGC&GCUACCGGA	(((((((((&)))))))))
K01C8.10.1	183	189	PAO_14306	10	16	-10.65	AGUCCGG&CCGGACU	(((((((&)))))))
F09B12.3.1	701	707	PAO_14306	7	13	-10.64	CCGGUGG&CUACCGG	(((((((&)))))))
K01D12.10.1	526	547	PAO_14306	3	21	-10.54	GGUGGAGGAGAUGGUGGUAGUG&CGCGCUACCGGACUGCGCU	((((.((....(((((((.(((&))))))))))..)).))))
M117.2a.1	828	837	PAO_14306	6	14	-10.49	UCCGGUACGU&GCUACCGGA	(((((((.((&)))))))))
Y22D7AL.5a.2	74	83	PAO_14306	6	16	-10.49	AGUUCGGAGC&GCUACCGGACU	((((((((((&))).)))))))
C17C3.1c.1	69	78	PAO_14306	6	16	-10.47	AGCUGGUAGU&GCUACCGGACU	((((((((((&)))))))).))
F29G9.3.1	568	577	PAO_14306	6	15	-10.42	GUCUGGUUGU&GCUACCGGAC	(((((((.((&)).)))))))
F44E7.8a.1	915	924	PAO_14306	7	16	-10.35	AGUUUGGAAG&CUACCGGACU	(((((((.((&)).)))))))
B0361.8.1	169	175	PAO_14306	7	13	-10.28	CCGGUGG&CUACCGG	(((((((&)))))))
F53C3.6a.1	129	147	PAO_14306	4	23	-10.25	GUGGUGCACGAGGUGGUGU&GCGCUACCGGACUGCGCUAU	((((((((...((((((((&))))))))....))))))))
F14H8.6b.1	805	815	PAO_14306	6	16	-10.08	AGUUUGGUUGC&GCUACCGGACU	((((((((.((&)).))))))))
F14F9.4.1	362	369	PAO_14306	6	13	-10.03	UCGGUGGC&GCUACCGG	((((((((&))))))))
B0285.4.2	1294	1305	PAO_14306	6	15	-9.98	GUCUGCGGUGGC&GCUACCGGAC	(((..(((((((&))))))))))
F54D8.3a.1	1438	1457	PAO_14306	3	18	-9.94	GCAGUCCGGAAUCGGUCGCG&CGCGCUACCGGACUGC	(((((((((....((.((((&)))))).)))))))))
W02D3.7.1	449	455	PAO_14306	9	15	-9.91	GUUCGGU&ACCGGAC	(((((((&)))))))
K07E3.8.1	444	451	PAO_14306	8	15	-9.86	GUCUGGUA&UACCGGAC	((((((((&))))))))
Y82E9BR.18.1	630	636	PAO_14306	8	14	-9.76	UCCGGUG&UACCGGA	(((((((&)))))))
F41B5.3a.1	181	195	PAO_14306	2	18	-9.68	GCAGUUCGGAGGUGU&GCGCGCUACCGGACUGC	(((((((((((((((&)))).)).)))))))))
F28C10.3.1	420	426	PAO_14306	6	12	-9.65	CGGUGGU&GCUACCG	(((((((&)))))))
F57C12.4.1	1050	1072	PAO_14306	1	21	-9.62	AGCCAGUUUGGAUCGGCUGCUCC&GGCGCGCUACCGGACUGCGCU	(((((((((((...(((.((.((&)).))))).)))))))).)))
ZK617.2.1	41	47	PAO_14306	6	12	-9.6	CGGUAGC&GCUACCG	(((((((&)))))))
F54D5.11.1	542	550	PAO_14306	6	15	-9.57	GUUGGUAGC&GCUACCGGAC	(((((((((&))))))).))
C49G7.5.1	311	317	PAO_14306	6	12	-9.52	UGGUAGC&GCUACCG	(((((((&)))))))
C35B1.1.1	822	828	PAO_14306	6	12	-9.5	CGGUAGU&GCUACCG	(((((((&)))))))
Y53F4B.33.1	578	593	PAO_14306	1	19	-9.46	CGCAGUUCCAGCCAUC&GGCGCGCUACCGGACUGCG	((((((((.((((.((&)).).)))...))))))))
F52E4.5.1	796	803	PAO_14306	6	13	-9.37	CUGGUGGC&GCUACCGG	((((((((&))))))))
C12C8.1.1	1540	1546	PAO_14306	7	13	-9.36	CUGGUAG&CUACCGG	(((((((&)))))))
R08F11.4.1	187	207	PAO_14306	4	21	-9.34	AGGUACGUCCGGGAGUGGUGC&GCGCUACCGGACUGCGCU	(((((.(((((...(((((((&))))))))))))))).))
C52B9.7a.1	426	437	PAO_14306	6	16	-9.17	GGUCUCGGUGGU&GCUACCGGACU	((((.(((((((&)))))))))))
F32D8.12a.1	457	467	PAO_14306	6	16	-9.08	GGAAUGGUAGC&GCUACCGGACU	((..(((((((&)))))))..))
K02E11.10.1	407	413	PAO_14306	7	13	-9.01	CCGGUGG&CUACCGG	(((((((&)))))))
F58F9.7.1	951	979	PAO_14306	1	21	-9	GGCGACAGUUUGGACCAGUAAAAGGCGCU&GGCGCGCUACCGGACUGCGCU	((((.((((((((...(((.....(((((&)))))))).))))))))))))
C47E12.1.1	1015	1023	PAO_14306	12	20	-8.97	GUGCAGUCC&GGACUGCGC	(((((((((&)))))))))
F57B9.6a.1	85	93	PAO_14306	6	14	-8.97	UUCGGUGGU&GCUACCGGA	(((((((((&)))))))))
ZK822.5a.1	1319	1325	PAO_14306	9	15	-8.96	GUCUGGU&ACCGGAC	(((((((&)))))))
C29F7.2b.1	1202	1208	PAO_14306	8	14	-8.89	UCUGGUA&UACCGGA	(((((((&)))))))
B0272.3.1	900	908	PAO_14306	7	16	-8.87	AGUCUGGAG&CUACCGGACU	(((((((((&)).)))))))
B0399.2.1	391	410	PAO_14306	1	20	-8.87	GCGAGUUUUGGUGGGAUGUC&GGCGCGCUACCGGACUGCGC	((((((.(((((((..((((&))))..)))))))))).)))
F09F3.9.1	2194	2201	PAO_14306	9	16	-8.81	AGUUUGGU&ACCGGACU	((((((((&))))))))
C02A12.1.1	311	318	PAO_14306	7	14	-8.79	UCCGGUAG&CUACCGGA	((((((((&))))))))
F11G11.2.1	278	284	PAO_14306	10	16	-8.79	AGUUCGG&CCGGACU	(((((((&)))))))
C54D10.1.1	739	745	PAO_14306	8	14	-8.77	UCCGGUG&UACCGGA	(((((((&)))))))
C34E10.6.1	1683	1690	PAO_14306	7	14	-8.76	UUUGGUAG&CUACCGGA	((((((((&))))))))
F09F7.8.1	189	195	PAO_14306	10	16	-8.76	AGUCUGG&CCGGACU	(((((((&)))))))
DH11.2.1	723	730	PAO_14306	9	16	-8.7	GGUCUGGU&ACCGGACU	((((((((&))))))))
K09F6.10.1	1011	1021	PAO_14306	6	16	-8.65	AGGCUGGUGGU&GCUACCGGACU	((.((((((((&)))))))).))
F21F8.11.1	185	191	PAO_14306	6	12	-8.57	CGGUGGC&GCUACCG	(((((((&)))))))
C17G10.8.1	308	317	PAO_14306	7	16	-8.56	AGUUCGGAGG&CUACCGGACU	(((((((.((&)).)))))))
F58B3.6.1	1208	1217	PAO_14306	7	16	-8.56	AGUUCGGGGG&CUACCGGACU	(((((((.((&)).)))))))
Y73F4A.2.1	733	754	PAO_14306	1	21	-8.54	AGCGUGGCUACCGUAACCCGUC&GGCGCGCUACCGGACUGCGCU	(((((((...(((((.(.((((&)))).).))).)).)))))))
F08H9.6.1	499	520	PAO_14306	4	23	-8.52	AUGGCGGAGUUUUCGGUGGUUC&GCGCUACCGGACUGCGCUAU	((((((.((((..(((((((.(&).))))))))))).))))))
CD4.7a.1	41	48	PAO_14306	6	13	-8.49	UCGGUGGU&GCUACCGG	((((((((&))))))))
DC2.5a.1	283	289	PAO_14306	8	14	-8.46	UCUGGUA&UACCGGA	(((((((&)))))))
C55B7.4a.1	1157	1163	PAO_14306	6	12	-8.45	CGGUGGU&GCUACCG	(((((((&)))))))
Y46G5A.18b.1	1064	1082	PAO_14306	3	24	-8.41	UGUACGGGGUUUUGGCGCG&CGCGCUACCGGACUGCGCUAUA	((((((.((((((((((((&)))))))..))))).)).))))
F12E12.11.1	291	297	PAO_14306	10	16	-8.39	AGUUCGG&CCGGACU	(((((((&)))))))
F22E10.3.1	3398	3404	PAO_14306	8	14	-8.35	UCCGGUA&UACCGGA	(((((((&)))))))
ZK632.3.1	214	221	PAO_14306	8	15	-8.34	GUUCGGUG&UACCGGAC	((((((((&))))))))
F40E10.3.1	188	195	PAO_14306	6	13	-8.31	UCGGUAGU&GCUACCGG	((((((((&))))))))
C01G6.6a.2	2171	2177	PAO_14306	8	14	-8.3	UCUGGUG&UACCGGA	(((((((&)))))))
F31D4.9.1	258	283	PAO_14306	1	23	-8.3	AUAGGACAACUUGUAGCGCGGAACCC&GGCGCGCUACCGGACUGCGCUAU	((((..((.((.((((((((....((&)))))))))).))..))..))))
Y49C4A.8a.1	1616	1623	PAO_14306	6	13	-8.28	UUGGUAGC&GCUACCGG	((((((((&))))))))
C08F8.2b.2	75	82	PAO_14306	8	15	-8.21	GUCUGGUG&UACCGGAC	((((((((&))))))))
K06A5.6.1	913	919	PAO_14306	10	16	-8.11	AGUUCGG&CCGGACU	(((((((&)))))))
R12E2.11.1	411	418	PAO_14306	6	13	-8.05	CUGGUGGU&GCUACCGG	((((((((&))))))))
K07A12.3.1	77	93	PAO_14306	1	18	-8.04	GCAGUUCCCACGCCGUC&GGCGCGCUACCGGACUGC	(((((((....((((((&)))).))....)))))))
R04B5.6.1	1173	1179	PAO_14306	6	12	-8	UGGUAGC&GCUACCG	(((((((&)))))))
F11C1.5a.1	4290	4304	PAO_14914	2	17	-18.93	ACUGGAGGGGCGGAU&GUUCGUCCACUCCGGU	(((((((((((((((&)))))))).)))))))
C07G3.2.1	498	515	PAO_14914	1	17	-18.7	ACUGGAGAGGAUCGAACU&GGUUCGUCCACUCCGGU	(((((((.(((.((((((&))))))))).)))))))
F37B4.7.1	912	927	PAO_14914	1	16	-18.13	CCGGAGUCUGCGAAUC&GGUUCGUCCACUCCGG	(((((((..(((((((&)))))))..)))))))
C37H5.3a.1	685	700	PAO_14914	1	16	-18.11	UUGGAGAAGAUGAACC&GGUUCGUCCACUCCGG	((((((..((((((((&))))))))..))))))
R11A5.4a.1	2006	2020	PAO_14914	1	17	-17.85	AUCGGAGUGGAAACC&GGUUCGUCCACUCCGGU	(((((((((((((((&))))..)))))))))))
C36A4.9a.1	1022	1039	PAO_14914	1	17	-17.37	GCCGAUUGUGGAUGGAUC&GGUUCGUCCACUCCGGU	((((...(((((((((((&)))))))))))..))))
E02H1.3.1	352	366	PAO_14914	1	15	-17.34	CGUUGUGGACGGACC&GGUUCGUCCACUCCG	((..(((((((((((&)))))))))))..))
C27B7.1a.1	784	795	PAO_14914	3	14	-17.25	GGAGAGGAUGAA&UUCGUCCACUCC	((((.(((((((&))))))).))))
Y53G8B.2.1	1005	1019	PAO_14914	2	14	-17.19	GGAGUGGAGAAGGAC&GUUCGUCCACUCC	((((((((...((((&)))).))))))))
R08F11.1a.1	2063	2078	PAO_14914	1	15	-16.93	CGGCAAUGGAUGAGCC&GGUUCGUCCACUCCG	(((.(.((((((((((&)))))))))).))))
C55B7.3.1	787	804	PAO_14914	1	17	-16.72	ACUGGAGGGACCAUGGCC&GGUUCGUCCACUCCGGU	(((((((((((...((((&)))).)))).)))))))
Y48G8AL.5a.1	1426	1440	PAO_14914	1	15	-16.65	CGGAGUCGAUGAAUC&GGUUCGUCCACUCCG	((((((.((((((((&)))))))).))))))
C14A4.14.1	1144	1154	PAO_14914	5	14	-16.25	GGAAGUGGACG&CGUCCACUCC	(((.(((((((&))))))))))
F56C11.6a.1	186	204	PAO_14914	1	17	-16.09	AUCGGAAAUGGACGGAGCC&GGUUCGUCCACUCCGGU	((((((..((((((((.((&)))))))))).))))))
D1005.3.1	364	380	PAO_14914	2	17	-15.98	ACCGGAGCUGAACGGAU&GUUCGUCCACUCCGGU	(((((((.((.((((((&)))))).)))))))))
W09H1.5.1	985	998	PAO_14914	3	17	-15.68	GCCGGUUGGAUGAA&UUCGUCCACUCCGGU	(((((.((((((((&))))))))..)))))
C05C10.3.1	1041	1054	PAO_14914	1	17	-15.45	AUUGGAGUGGGACC&GGUUCGUCCACUCCGGU	((((((((((((((&))))...))))))))))
E03H4.8.1	1090	1102	PAO_14914	6	17	-15.32	ACCAGGGGUGGGC&GUCCACUCCGGU	(((.(((((((((&))))))))))))
F08A8.3.1	316	332	PAO_14914	2	17	-15.31	AUUGGGGAUGGAGGGAC&GUUCGUCCACUCCGGU	(((((((.((((.((((&)))).)))))))))))
F54A5.2a.1	657	673	PAO_14914	1	17	-15.31	AUCAGAAUGGACGAAUC&GGUUCGUCCACUCCGGU	(((.((.((((((((((&)))))))))).)).)))
C52B9.7a.1	32	41	PAO_14914	1	10	-15.28	UGGACGAAUC&GGUUCGUCCA	((((((((((&))))))))))
W02D3.5.1	81	97	PAO_14914	1	16	-15.25	UUGGAGUUGGAUUGAUC&GGUUCGUCCACUCCGG	(((((((.((((.((((&)))).)))))))))))
F14F9.4.1	1389	1407	PAO_14914	1	17	-15.18	ACCGAAAUUUUGACGAACC&GGUUCGUCCACUCCGGU	((((.......((((((((&)))))))).....))))
C16A3.7.1	2303	2313	PAO_14914	1	11	-15.08	GUGGACGAAUU&GGUUCGUCCAC	(((((((((((&)))))))))))
F43E2.4.1	1995	2005	PAO_14914	2	13	-14.92	GAGUGGAGGAC&GUUCGUCCACUC	(((((((((((&)))).)))))))
C15B12.8.1	562	579	PAO_14914	1	17	-14.91	ACCGGAGAAUACAAAACC&GGUUCGUCCACUCCGGU	(((((((...((..((((&)))).))...)))))))
R02E12.6.2	249	260	PAO_14914	4	14	-14.86	GUGAGUGGACGA&UCGUCCACUCC	(.((((((((((&)))))))))))
C47A10.1.1	1872	1891	PAO_14914	1	17	-14.85	GCUGAUGUGGAUGACAAGCC&GGUUCGUCCACUCCGGU	((((..((((((((...(((&)))))))))))..))))
F14F7.3.1	253	272	PAO_14914	1	17	-14.81	ACUGAAAGAGUGGACAAAGC&GGUUCGUCCACUCCGGU	((((...((((((((.((.(&).)).))))))))))))
C54G7.2.1	1177	1197	PAO_14914	1	17	-14.7	GCUGGAGAUUCCUGGACGAUC&GGUUCGUCCACUCCGGU	(((((((.....(((((((((&))).)))))))))))))
C14B1.3.1	330	342	PAO_14914	3	16	-14.57	UUGGAGUGGAGAA&UUCGUCCACUCCGG	(((((((((((((&))).))))))))))
C35B1.2a.1	101	115	PAO_14914	3	17	-14.57	AUUGGAGAGGACGAG&UUCGUCCACUCCGGU	(((((((.(((((((&))))))).)))))))
C47E12.4c.1	432	448	PAO_14914	1	17	-14.53	ACCGGAGCCGGAGAUUC&GGUUCGUCCACUCCGGU	(((((((..(((((.((&)).)).))).)))))))
C01A2.4.1	476	493	PAO_14914	2	16	-14.4	CUGGAGACGCCGACGAAC&GUUCGUCCACUCCGG	((((((.....(((((((&)))))))..))))))
F53A2.7.1	1163	1183	PAO_14914	1	17	-14.29	AUUGGAGGAGGACAAGGAAUC&GGUUCGUCCACUCCGGU	(((((((..((((...(((((&))))))))).)))))))
F22E10.3.1	1012	1022	PAO_14914	6	16	-14.12	CUGGAGUGGAU&GUCCACUCCGG	(((((((((((&)))))))))))
Y46H3A.2.1	146	155	PAO_14914	1	10	-13.75	UGGACGAACU&GGUUCGUCCA	((((((((((&))))))))))
F09F7.4a.1	330	342	PAO_14914	5	17	-13.66	GCUGGAGGAGAUG&CGUCCACUCCGGU	(((((((..((((&))))..)))))))
C05D11.11a.1	1063	1074	PAO_14914	1	17	-13.65	ACCGGAGGAACC&GGUUCGUCCACUCCGGU	((((((((((((&))))).....)))))))
F13C5.1.1	341	355	PAO_14914	1	14	-13.65	GGAGUGGAGUUGGCC&GGUUCGUCCACUCC	((((((((...((((&))))..))))))))
K01D12.11.1	601	617	PAO_14914	1	17	-13.61	AUCGGAGAUUUUGAACC&GGUUCGUCCACUCCGGU	(((((((....((((((&))))))....)))))))
F15E6.6.1	3679	3695	PAO_14914	2	17	-13.6	AUUGGAGAAAGGAGAAU&GUUCGUCCACUCCGGU	(((((((...(((((((&)))).))).)))))))
K01C8.10.1	302	319	PAO_14914	1	17	-13.6	GCUGGAGAUGGAACAACU&GGUUCGUCCACUCCGGU	(((((((.((((..((((&))))..)))))))))))
C05A9.1a.1	2464	2477	PAO_14914	1	12	-13.59	AGUGGACGAUCGCC&GGUUCGUCCACU	(((((((((..(((&))))))))))))
C46F4.2.1	1692	1711	PAO_14914	1	17	-13.58	ACUGGAGAUAUUGGUGAAUU&GGUUCGUCCACUCCGGU	(((((((....(((((((((&)))))).))))))))))
Y37E3.9.1	701	723	PAO_14914	1	17	-13.58	GCCGGAGACGGACUUGUCGAGCU&GGUUCGUCCACUCCGGU	(((((((..((((.....(((((&))))))))).)))))))
D2096.8.1	746	764	PAO_14914	3	17	-13.55	ACCAAAGAGCAAGGACGAG&UUCGUCCACUCCGGU	(((...(((...(((((((&))))))).))).)))
F09F3.9.1	1234	1252	PAO_14914	1	17	-13.51	GCUGGAGAUGGUACUAAUC&GGUUCGUCCACUCCGGU	(((((((.(((.((.((((&)))).))))))))))))
D2063.1.1	569	588	PAO_14914	1	17	-13.49	GCUGGUGGUGGGCUGGGAUC&GGUUCGUCCACUCCGGU	(((((.(((((((..(((((&)))))))))))))))))
VC5.5.1	860	876	PAO_14914	1	17	-13.44	ACUGGACUCGACGGGCU&GGUUCGUCCACUCCGGU	((((((.(.((((((((&)))))))).).))))))
F28C10.3.1	903	918	PAO_14914	1	15	-13.41	CGGACCGGACGGAACU&GGUUCGUCCACUCCG	((((..(((((((.((&)))))))))..))))
F27D4.1.1	735	748	PAO_14914	1	17	-13.4	GCCGGAGUCGGAGC&GGUUCGUCCACUCCGGU	((((((((((((.(&).))))...))))))))
F49E8.5.1	149	155	PAO_14914	11	17	-13.31	ACCGGAG&CUCCGGU	(((((((&)))))))
F41C3.5.1	226	235	PAO_14914	1	10	-13.26	UGGACGGACU&GGUUCGUCCA	((((((((((&))))))))))
F09B12.3.1	192	200	PAO_14914	4	12	-13.22	AGUGGACGA&UCGUCCACU	(((((((((&)))))))))
F54D8.3a.1	1106	1125	PAO_14914	1	17	-13.01	GCUGGAAAGAAGGAUGGAGC&GGUUCGUCCACUCCGGU	((((((.....(((((((.(&).)))))))..))))))
C06E7.1a.1	959	975	PAO_14914	1	17	-12.99	AUCGGAGUAGCCAAACC&GGUUCGUCCACUCCGGU	((((((((.(.(.((((&)))).).).))))))))
K09F6.10.1	1222	1230	PAO_14914	1	9	-12.95	GGACGAAUC&GGUUCGUCC	(((((((((&)))))))))
W07B8.5.1	896	913	PAO_14914	1	17	-12.95	ACUGGAGUGUACGUACAC&GGUUCGUCCACUCCGGU	(((((((((.(((.((.(&))).))).)))))))))
B0399.2.1	1430	1446	PAO_14914	2	14	-12.89	GGAAAAUUUGGACGGAC&GUUCGUCCACUCC	(((.....(((((((((&))))))))).)))
C17C3.1a.1	516	522	PAO_14914	11	17	-12.83	ACCGGAG&CUCCGGU	(((((((&)))))))
K08E5.1b.1	791	798	PAO_14914	7	14	-12.74	GGAGUGGG&UCCACUCC	((((((((&))))))))
DC2.5a.1	547	565	PAO_14914	3	17	-12.71	GCCGGCGUUCUUGGACGAA&UUCGUCCACUCCGGU	(((((.((....(((((((&))))))))).)))))
F58B3.6.1	231	247	PAO_14914	1	17	-12.66	ACCAGAAUUGACGGAUU&GGUUCGUCCACUCCGGU	(((.((.(.((((((((&)))))))).).)).)))
F12E12.11.1	350	361	PAO_14914	2	14	-12.64	GGACGGAUGGGC&GUUCGUCCACUCC	(((.((((((((&))))))))..)))
ZK455.1.1	1858	1869	PAO_14914	2	15	-12.55	CGGAGUGGCAAC&GUUCGUCCACUCCG	((((((((((((&))).).))))))))
C34E10.6.1	660	677	PAO_14914	1	17	-12.47	GCUGGAGUCGGAAAGACU&GGUUCGUCCACUCCGGU	((((((((.(((..((((&))))..)))))))))))
F49D11.8.1	312	328	PAO_14914	3	16	-12.44	UCGGAGUCAAGGAUGAA&UUCGUCCACUCCGG	(((((((...(((((((&))))))))))))))
ZK822.5a.1	315	331	PAO_14914	1	17	-12.43	AUUGGGGUGGCGUCAUC&GGUUCGUCCACUCCGGU	((((((((((((..(((&))).)).))))))))))
F44G3.2.1	1118	1131	PAO_14914	1	15	-12.41	UGGAGUGAAGAAUC&GGUUCGUCCACUCCG	(((((((..(((((&)))))...)))))))
E04A4.4c.2	49	68	PAO_14914	1	17	-12.39	GCAUGGAAGCUGGAUGAGCU&GGUUCGUCCACUCCGGU	((.((((.(.((((((((((&)))))))))))))))))
C29F5.1.1	531	549	PAO_14914	1	17	-12.26	GCCGGAGAAGGAUUGUUCC&GGUUCGUCCACUCCGGU	(((((((..(((.((..((&))..))))).)))))))
Y58A7A.3.1	991	998	PAO_14914	10	17	-12.24	AUCGGAGU&ACUCCGGU	((((((((&))))))))
C06G3.1a.1	362	374	PAO_14914	1	15	-12.2	CGGAGUGACUGCU&GGUUCGUCCACUCCG	(((((((((.(((&)))..)).)))))))
F28F8.2.1	737	754	PAO_14914	1	17	-12.17	ACUUCGACCGGAUGAGCC&GGUUCGUCCACUCCGGU	(((..((..(((((((((&)))))))))..)).)))
F32D8.12a.1	1282	1304	PAO_14914	1	17	-12.16	ACUGGAGAACAUGGAAUUGGACU&GGUUCGUCCACUCCGGU	(((((((....((((..((((((&)))))))))))))))))
F44C4.3.1	837	844	PAO_14914	10	17	-12.16	ACCGGAGU&ACUCCGGU	((((((((&))))))))
C15H11.3.1	1629	1643	PAO_14914	3	17	-12.1	AUCGGAGUUAACGGA&UUCGUCCACUCCGGU	((((((((..(((((&)))))..))))))))
C29F7.2a.1	550	566	PAO_14914	2	17	-12.08	ACCGAAGAGUGGAAGAC&GUUCGUCCACUCCGGU	((((..(((((((.(((&)).).)))))))))))
F08F3.7.1	1002	1015	PAO_14914	1	14	-12.08	GGAGAGAGUGAGCC&GGUUCGUCCACUCC	((((.(.(((((((&))))))).).))))
K10D2.6.1	771	787	PAO_14914	1	14	-12.04	GGAGAAUUUGGACGACU&GGUUCGUCCACUCC	((((....(((((((((&)).)))))))))))
C12D8.10c.1	1008	1024	PAO_14914	1	16	-11.97	CCGGAGUAUCUUGCACC&GGUUCGUCCACUCCGG	(((((((....((.(((&))).))...)))))))
Y82E9BR.18.1	594	603	PAO_14914	1	10	-11.97	UGGACGAAUU&GGUUCGUCCA	((((((((((&))))))))))
D2023.2a.1	3155	3166	PAO_14914	7	17	-11.95	AUCGAGAGUGGA&UCCACUCCGGU	((((.(((((((&)))))))))))
C01B12.3.1	863	876	PAO_14914	3	17	-11.92	AUUGGGUGGAUGAA&UUCGUCCACUCCGGU	((((((((((((((&))))))))).)))))
ZC97.1a.1	11	24	PAO_14914	1	16	-11.89	CCGGGGUGAUAACC&GGUUCGUCCACUCCGG	((((((((((((((&)))).)).))))))))
C12C8.1.1	1198	1216	PAO_14914	1	16	-11.84	CUGGAGUAAAAGAUGAUAC&GGUUCGUCCACUCCGG	(((((((....(((((..(&)..))))).)))))))
C10H11.4.1	643	660	PAO_14914	1	17	-11.83	ACUGGAGAUGUGAUGACU&GGUUCGUCCACUCCGGU	(((((((.((.(((((((&))).)))))))))))))
ZK697.14.1	628	643	PAO_14914	3	14	-11.79	GGAGAAAAUGGAUGGG&UUCGUCCACUCC	((((....((((((((&))))))))))))
F54D5.12.1	1017	1027	PAO_14914	5	15	-11.78	CGGAGUGCUCG&CGUCCACUCCG	(((((((..((&))..)))))))
M60.7.1	379	389	PAO_14914	1	11	-11.76	GUUGACGAGCC&GGUUCGUCCAC	((.((((((((&)))))))).))
K07E3.8.1	250	270	PAO_14914	1	15	-11.75	CGGAAAAGGAUUUUACGGACC&GGUUCGUCCACUCCG	((((...((.....(((((((&)))))))))..))))
C17G10.8.1	934	948	PAO_14914	3	17	-11.72	GCCGGAGUUGUUGAA&UUCGUCCACUCCGGU	((((((((.(.((((&)))).).))))))))
Y105E8A.4.1	19	33	PAO_14914	3	17	-11.7	ACCGGAGCCGCCGAA&UUCGUCCACUCCGGU	(((((((..(.((((&)))).)..)))))))
F41B5.4.1	1276	1291	PAO_14914	1	15	-11.69	CAGAGAUGUGCGAACC&GGUUCGUCCACUCCG	(.(((.((.(((((((&))))))).))))).)
Y22D7AL.10.1	173	185	PAO_14914	6	17	-11.69	GCCGGAGCCGGAC&GUCCACUCCGGU	(((((((..((((&)))).)))))))
K12G11.3.1	601	620	PAO_14914	1	17	-11.66	GCCGGAGGUGGUCUCGGAUC&GGUUCGUCCACUCCGGU	(((((((.(((...((((((&)))))).))))))))))
F49E12.9a.1	1040	1055	PAO_14914	1	17	-11.62	GCUGGAGCAUGAAACC&GGUUCGUCCACUCCGGU	(((((((.(((.((((&)))))))...)))))))
F53C3.6a.1	164	171	PAO_14914	5	12	-11.62	GGUGGACG&CGUCCACU	((((((((&))))))))
M02F4.8.1	610	625	PAO_14914	1	17	-11.6	GCCUAUGGAAUGAACC&GGUUCGUCCACUCCGGU	(((..(((.(((((((&))))))))))....)))
F57B10.3a.1	392	405	PAO_14914	5	17	-11.58	AUCGGAGCCGGACG&CGUCCACUCCGGU	(((((((..(((((&))))).)))))))
F54D11.1.1	774	785	PAO_14914	2	13	-11.57	GAGUGGAUGUUC&GUUCGUCCACUC	(((((((((..(&)..)))))))))
C31C9.1a.1	240	253	PAO_14914	2	16	-11.51	UCGGCGGGAUGAAC&GUUCGUCCACUCCGG	((((.(((((((((&)))))))).).))))
F26D10.9a.1	818	831	PAO_14914	1	14	-11.51	GGAGUCGACGGAUU&GGUUCGUCCACUCC	(((((.((((((((&)))))))).)))))
R03D7.1.1	229	240	PAO_14914	6	17	-11.51	GCCGGAGCAGAC&GUCCACUCCGGU	(((((((..(((&)))..)))))))
F57C12.4.1	2618	2630	PAO_14914	6	17	-11.46	AUUGGAGAUGGAU&GUCCACUCCGGU	(((((((.(((((&))))))))))))
C27A7.5a.1	1299	1307	PAO_14914	9	17	-11.4	AUCGGAGUG&CACUCCGGU	(((((((((&)))))))))
ZK896.5.1	1087	1094	PAO_14914	4	11	-11.31	GUGGACGG&UCGUCCAC	((((((((&))))))))
F09E5.3.1	590	596	PAO_14914	11	17	-11.3	ACUGGAG&CUCCGGU	(((((((&)))))))
C06A8.1b.1	88	94	PAO_14914	11	17	-11.24	ACUGGAG&CUCCGGU	(((((((&)))))))
K11C4.4.1	1227	1241	PAO_14914	1	15	-11.2	CGGAGUCUACGGAUC&GGUUCGUCCACUCCG	((((((..(((((((&)))))))..))))))
K02F2.2.1	497	512	PAO_14914	1	17	-11.19	ACUGGAGUCCACAACU&GGUUCGUCCACUCCGGU	((((((((..((((((&)))).))..))))))))
Y54E10A.17b.1	109	117	PAO_14914	3	11	-11.17	GUGGAUGGA&UUCGUCCAC	(((((((((&)))))))))
Y53F4B.33.1	75	82	PAO_14914	10	17	-11.15	GCCGGAGU&ACUCCGGU	((((((((&))))))))
Y57A10C.6.1	769	786	PAO_14914	1	17	-11.14	GCUGGGAACCGAUGAGCC&GGUUCGUCCACUCCGGU	((((((....((((((((&))))))))...))))))
F40F4.2.1	528	535	PAO_14914	2	9	-11.09	GGACGGAC&GUUCGUCC	((((((((&))))))))
F31D4.9.1	26	42	PAO_14914	1	16	-11.07	CUGGAGUCAUCACAACC&GGUUCGUCCACUCCGG	(((((((....((((((&)))).))..)))))))
C25A1.7.1	1355	1367	PAO_14914	3	17	-11.05	ACUGGAGAACGAA&UUCGUCCACUCCGGU	(((((((.(((((&)))))...)))))))
C14C10.3a.1	951	965	PAO_14914	1	14	-11.02	GGCAGUAGAUGAACU&GGUUCGUCCACUCC	((.(((.((((((((&)))))))).)))))
F52E4.5.1	888	904	PAO_14914	1	16	-11.02	UUGGAGUGGGUCCAACU&GGUUCGUCCACUCCGG	((((((((((.(.((((&)))).)))))))))))
F57B9.1.1	593	606	PAO_14914	1	16	-11.02	CUGGGGUGGAUAUC&GGUUCGUCCACUCCGG	((((((((((((((&)))..)))))))))))
[truncated: 5,135 more rows]
